# Supplementary material for: Updated and validated solar irradiance reference spectra for estimating environmental photodegradation rates
Source: Royal Society of Chemistry journal article supplement (doi:10.1039/c8em00478a), 2019-01-01
Supplement: c8em00478a2.xlsx [file c8em00478a2.xlsx]

## Sheet: 0deg
0 degrees latitude	Daily Irradiance (mE cm-2 d-1 nm-1)					Solar Noon Irradiance (mE cm-2 d-1 nm-1)
wavelength (nm)	March 20th	June 21st	September 22nd	December 22nd		March 20th	June 21st	September 22nd	December 22nd
280	4.89165e-17	3.42191e-18	9.71879e-18	1.16474e-17		6.73455e-16	4.8063e-17	1.37274e-16	1.60832e-16
281	1.3096e-15	1.13003e-16	3.00035e-16	3.4699e-16		1.72883e-14	1.52654e-15	4.06311e-15	4.60974e-15
282	4.13164e-14	5.14481e-15	1.0162e-14	1.47235e-14		5.04302e-13	6.39022e-14	1.30602e-13	1.7977e-13
283	2.41828e-13	3.41322e-14	6.66146e-14	9.24617e-14		2.85652e-12	4.12481e-13	8.09466e-13	1.10114e-12
284	2.51086e-12	4.12747e-13	7.46834e-13	1.04379e-12		2.83787e-11	4.81921e-12	8.62407e-12	1.21018e-11
285	7.51795e-12	1.22773e-12	2.16829e-12	3.01217e-12		8.57673e-11	1.42295e-11	2.43758e-11	3.5294e-11
286	6.22332e-11	1.3185e-11	4.427e-11	2.78964e-11		6.49352e-10	1.44332e-10	5.35723e-10	3.00573e-10
287	3.84424e-10	9.32081e-11	1.61413e-10	1.85599e-10		3.82926e-09	9.78332e-10	1.65279e-09	1.91821e-09
288	1.99997e-09	5.789e-10	9.30639e-10	1.07141e-09		1.86083e-08	5.72451e-09	8.90384e-09	1.04347e-08
289	1.15197e-08	3.70947e-09	5.70241e-09	6.57858e-09		1.02496e-07	3.51936e-08	5.22093e-08	6.14776e-08
290	5.56529e-08	1.99823e-08	3.01776e-08	3.28941e-08		4.69295e-07	1.82496e-07	2.60688e-07	2.96125e-07
291	1.50106e-07	5.80928e-08	8.61982e-08	9.17687e-08		1.22482e-06	5.07315e-07	7.19797e-07	7.8938e-07
292	5.07656e-07	2.17081e-07	3.13092e-07	3.25976e-07		3.95121e-06	1.77187e-06	2.49067e-06	2.61692e-06
293	1.02807e-06	4.63586e-07	6.61241e-07	6.76336e-07		7.82637e-06	3.58535e-06	5.14345e-06	5.13485e-06
294	1.90714e-06	9.27372e-07	1.30736e-06	1.28793e-06		1.39598e-05	6.68147e-06	9.7575e-06	9.14488e-06
295	4.22858e-06	2.20127e-06	2.99775e-06	2.97985e-06		2.92252e-05	1.55236e-05	2.1119e-05	2.0746e-05
296	1.14928e-05	6.37202e-06	8.49221e-06	8.37125e-06		7.55808e-05	4.28119e-05	5.68721e-05	5.55665e-05
297	1.43431e-05	8.31974e-06	1.09014e-05	1.07065e-05		9.07458e-05	5.38018e-05	7.01719e-05	6.84216e-05
298	3.60575e-05	2.19608e-05	2.8301e-05	2.76198e-05		0.000217933	0.000135609	0.000173888	0.000168579
299	5.89811e-05	3.71368e-05	4.72228e-05	4.60455e-05		0.000344762	0.000221377	0.000280487	0.000271018
300	7.04742e-05	4.61532e-05	5.84668e-05	5.50067e-05		0.00039426	0.000262266	0.00033228	0.000309755
301	0.000123186	8.32206e-05	0.000106237	9.77775e-05		0.000664273	0.0004571	0.000580629	0.000532566
302	0.000120574	8.32028e-05	0.000104609	9.73493e-05		0.000632996	0.000445192	0.000556526	0.000515924
303	0.000318976	0.000226908	0.000281753	0.000262098		0.00160688	0.00116298	0.00143758	0.00133099
304	0.000320866	0.00023149	0.000285857	0.000265799		0.00158393	0.00116155	0.00142912	0.00132152
305	0.000516655	0.000383034	0.000467245	0.000435146		0.00244476	0.00183931	0.00223816	0.00207029
306	0.000484921	0.000364377	0.00044187	0.000411766		0.00224533	0.00170875	0.00207029	0.00191391
307	0.000751011	0.000577579	0.000698404	0.000642646		0.00334145	0.00260401	0.00313055	0.00288091
308	0.00087594	0.000680245	0.000819083	0.000753794		0.00382782	0.00301147	0.00360687	0.0033185
309	0.000821626	0.000642359	0.000771414	0.000709754		0.00354231	0.00280487	0.0033515	0.0030832
310	0.00081052	0.000642491	0.000766911	0.00070602		0.00340028	0.00272596	0.00323959	0.0029799
311	0.00154204	0.00122949	0.00146369	0.00134797		0.00639166	0.00515206	0.00610758	0.00562122
312	0.00134913	0.00108575	0.00128682	0.00118637		0.00547918	0.00445336	0.00525967	0.0048436
313	0.00163136	0.00132292	0.0015622	0.00144121		0.00651217	0.00532997	0.00627401	0.00578047
314	0.00191508	0.00155907	0.00183733	0.00169639		0.00757673	0.00622236	0.00730988	0.00674173
315	0.00201682	0.00165688	0.00194353	0.00179672		0.00781059	0.00645765	0.00755808	0.00697702
316	0.00143937	0.00118528	0.00138857	0.00128415		0.00554661	0.00458679	0.00537014	0.0049512
317	0.00243075	0.00200912	0.0023501	0.00217239		0.0092697	0.00766138	0.00899567	0.00825679
318	0.00193378	0.00160077	0.00187181	0.0017297		0.00733713	0.00606598	0.00712767	0.00653369
319	0.00257205	0.00214675	0.0025022	0.00231231		0.00952795	0.00793398	0.00929696	0.00852651
320	0.0027095	0.00224993	0.00262791	0.00242798		0.0101779	0.00843039	0.00990384	0.00907744
321	0.00269386	0.00227035	0.00258434	0.00243796		0.0097532	0.00824674	0.00942321	0.00884359
322	0.0028828	0.00241036	0.00280596	0.00259509		0.0106384	0.00887658	0.0103845	0.00953655
323	0.00238667	0.00200441	0.00232767	0.00219826		0.00870011	0.00728979	0.00850786	0.00798563
324	0.00321638	0.00272611	0.00315063	0.00292089		0.0114648	0.00974172	0.0112439	0.0104275
325	0.00304569	0.00256817	0.00292239	0.0027583		0.0110143	0.00932135	0.0106456	0.0099971
326	0.00442357	0.00375245	0.00433501	0.00401959		0.0157245	0.0133773	0.0154375	0.0143156
327	0.00435657	0.00370301	0.00427411	0.00396383		0.0154088	0.0131291	0.0151362	0.014043
328	0.00393653	0.00333096	0.00385072	0.00357252		0.0141004	0.0119698	0.0138134	0.0128235
329	0.00461105	0.00393025	0.00452971	0.00420292		0.0161692	0.0138106	0.0158966	0.0147632
330	0.00528089	0.00450291	0.00518793	0.00481421		0.0185078	0.0158106	0.0181922	0.0168866
331	0.00445507	0.00378722	0.00436919	0.00405469		0.0157532	0.0134232	0.0154662	0.0143615
332	0.00469863	0.00401206	0.00461832	0.00428831		0.0163988	0.01402	0.0161262	0.0149784
333	0.00461892	0.00394657	0.0045419	0.00421756		0.0160832	0.0137661	0.0158249	0.0147058
334	0.00438631	0.00373983	0.00430724	0.00399971		0.0153658	0.013132	0.0151076	0.0140358
335	0.00479995	0.00410604	0.00473493	0.00437759		0.016657	0.0142754	0.0164275	0.0152223
336	0.00371765	0.00318072	0.00366479	0.00339263		0.0128952	0.011053	0.0127116	0.0117876
337	0.00364926	0.003119	0.00358715	0.00333359		0.0126958	0.0108723	0.0124863	0.0116155
338	0.00456356	0.00390594	0.00450165	0.00416427		0.0158106	0.0135609	0.0155954	0.0144619
339	0.00497693	0.00426004	0.00490444	0.00454522		0.0172453	0.0147919	0.0170014	0.0157819
340	0.00589215	0.0050447	0.00581102	0.00537917		0.0204017	0.0175035	0.0201147	0.0186656
341	0.004968	0.00425337	0.00489514	0.00453809		0.0172022	0.0147489	0.016944	0.0157388
342	0.0054605	0.00467576	0.00537848	0.0049908		0.0188952	0.0162123	0.0186083	0.0173027
343	0.00564147	0.00483251	0.00555693	0.0051566		0.0195121	0.0167431	0.0192108	0.0178622
344	0.00406886	0.00348545	0.00401175	0.00371716		0.0140645	0.0120746	0.013868	0.0128766
345	0.00526622	0.00451072	0.0051866	0.00481398		0.0181922	0.0156097	0.0179196	0.016657
346	0.00457564	0.00392151	0.00450596	0.00418547		0.0157962	0.0135638	0.0155523	0.0144763
347	0.00557204	0.00477574	0.00548876	0.00509698		0.0192252	0.0165136	0.0189382	0.0176183
348	0.0051448	0.00440975	0.0050659	0.00470775		0.0177474	0.0152367	0.0174748	0.0162697
349	0.00478044	0.00409885	0.00470728	0.00437547		0.0164705	0.0141549	0.0162266	0.0151076
350	0.00587219	0.00503556	0.00578208	0.00537576		0.0202295	0.0173744	0.0199139	0.0185509
351	0.00553783	0.00474875	0.00545318	0.00506984		0.0190674	0.0163845	0.0187804	0.0174892
352	0.0057985	0.00497341	0.00571012	0.0053078		0.0199569	0.0171592	0.0196556	0.018307
353	0.0057107	0.00490008	0.00562257	0.00522951		0.0196413	0.0168866	0.01934	0.01802
354	0.0063284	0.00542854	0.00623057	0.00579489		0.0217646	0.0187087	0.0214346	0.0199712
355	0.00641906	0.00550866	0.00632122	0.00587921		0.0220659	0.0189813	0.0217359	0.0202582
356	0.00609585	0.00523204	0.00600137	0.00558575		0.0209325	0.0180057	0.0206169	0.0192252
357	0.0043053	0.00369552	0.00423908	0.0039448		0.0147919	0.0127202	0.0145624	0.0135781
358	0.00418995	0.00359726	0.0041254	0.00383972		0.0143902	0.0123773	0.0141621	0.0132109
359	0.00502683	0.00431673	0.00495025	0.00460785		0.0172453	0.0148493	0.016987	0.0158393
360	0.00681034	0.0058489	0.00670586	0.00624214		0.0233572	0.0201147	0.0229985	0.0214633
361	0.00496648	0.0042654	0.00488966	0.00455359		0.0170301	0.0146628	0.0167718	0.0156527
362	0.00495447	0.00425692	0.00487897	0.00454476		0.0169727	0.0146198	0.0167144	0.0156097
363	0.00616712	0.00530041	0.00607335	0.00565807		0.0211047	0.0181922	0.020789	0.0194117
364	0.0069615	0.00598473	0.0068548	0.00638818		0.0238163	0.0205164	0.0234433	0.0219081
365	0.00606508	0.00521272	0.00597119	0.00556536		0.020746	0.0178766	0.020416	0.0190817
366	0.00808529	0.00695119	0.00795954	0.0074204		0.0276326	0.0238163	0.0272022	0.0254232
367	0.00741295	0.00637611	0.0073002	0.0068047		0.0253227	0.0218364	0.0249354	0.0232998
368	0.00673836	0.0057944	0.00663338	0.00618524		0.0230128	0.0198421	0.0226542	0.0211764
369	0.00736821	0.00633716	0.00725438	0.00676528		0.0251506	0.0216786	0.0247632	0.023142
370	0.00839857	0.00722551	0.00827011	0.00771304		0.0286513	0.0247058	0.0282065	0.0263701
371	0.0069876	0.00601378	0.00688118	0.00641926		0.0238163	0.0205451	0.0234576	0.0219368
372	0.00580703	0.00499777	0.00571738	0.00533552		0.0197991	0.0170731	0.0194834	0.0182352
373	0.00710588	0.00611615	0.00699683	0.00652889		0.0242036	0.0208895	0.0238306	0.0222955
374	0.00673592	0.00579923	0.00663249	0.00619034		0.0229268	0.0197991	0.0225824	0.0211334
375	0.00543683	0.00468134	0.00535323	0.00499734		0.0184935	0.0159684	0.0182209	0.0170444
376	0.006735	0.00580058	0.00663277	0.00619116		0.0229124	0.0197847	0.0225681	0.021119
377	0.00741326	0.00638517	0.00729917	0.00681562		0.025208	0.0217646	0.0248206	0.0232424
378	0.00943606	0.00813047	0.00929227	0.00867662		0.0320659	0.0277044	0.0315781	0.0295695
379	0.00738048	0.00635728	0.00726639	0.00678624		0.0250788	0.0216642	0.0246915	0.0231133
380	0.00701832	0.00604531	0.00690997	0.00645329		0.023845	0.0206025	0.0234863	0.0219798
381	0.00854466	0.00736275	0.00841313	0.00785922		0.0290099	0.0250645	0.0285652	0.0267574
382	0.00602992	0.0051967	0.00593763	0.0055466		0.020459	0.0176757	0.0201434	0.0188665
383	0.00477205	0.0041135	0.00469785	0.00439123		0.0161836	0.0139856	0.0159253	0.0149354
384	0.00507796	0.00437729	0.00499896	0.00467272		0.0172166	0.014878	0.016944	0.0158823
385	0.00742263	0.00640126	0.00730949	0.00683194		0.0251506	0.0217503	0.0247632	0.0232137
386	0.00594024	0.00512322	0.00584849	0.00546924		0.0201147	0.0173888	0.0197991	0.0185652
387	0.00650332	0.00561056	0.0064036	0.0059886		0.0220085	0.0190387	0.0216642	0.0203156
388	0.00676119	0.0058332	0.00665812	0.00622558		0.0228694	0.0197847	0.022525	0.021119
389	0.00723147	0.00624041	0.0071206	0.00666031		0.0244619	0.0211621	0.0240745	0.0225824
390	0.00881511	0.00760846	0.00868027	0.00812056		0.029799	0.0257818	0.0293399	0.0275178
391	0.00957541	0.00826491	0.00942902	0.00882287		0.0323528	0.0279913	0.0318507	0.0298851
392	0.00824042	0.00711261	0.00811434	0.00759289		0.0278335	0.0240889	0.0274031	0.0257101
393	0.00412091	0.00355769	0.00405736	0.00379769		0.0139067	0.0120401	0.0136929	0.0128522
394	0.00611152	0.00527683	0.00601856	0.00563439		0.0206169	0.0178479	0.0203012	0.019053
395	0.00950206	0.00820721	0.00935567	0.00876012		0.0320372	0.0277474	0.0315494	0.0296125
396	0.00838433	0.00723892	0.00825412	0.00772767		0.0282639	0.0244762	0.0278335	0.0261262
397	0.00369195	0.00318944	0.0036351	0.00340432		0.0124361	0.0107733	0.0122453	0.0114992
398	0.0105265	0.00909275	0.0103644	0.00970623		0.0354662	0.0307173	0.034921	0.0327832
399	0.0118206	0.0102132	0.011639	0.0109023		0.0397847	0.0344762	0.0391821	0.0368005
400	0.0122489	0.0105839	0.0120609	0.0112982		0.0412337	0.0357244	0.0406024	0.0381347
401	0.0126039	0.0108887	0.0124109	0.0116236		0.0424532	0.0367718	0.0417933	0.0392538
402	0.0133466	0.0115326	0.0131404	0.0123111		0.0449066	0.0389238	0.0442179	0.0415494
403	0.0127187	0.010992	0.0125231	0.0117353		0.0427689	0.037073	0.0421232	0.0395838
404	0.0125409	0.0108411	0.0123478	0.0115714		0.0421663	0.0365566	0.0415207	0.0390243
405	0.0125599	0.0108575	0.0123668	0.0115896		0.0422237	0.0365996	0.0415781	0.0390673
406	0.0124017	0.0107218	0.0122105	0.0114457		0.0416641	0.0361261	0.0410185	0.0385508
407	0.0122465	0.010592	0.0120566	0.0113055		0.0411046	0.0356527	0.0404733	0.038063
408	0.0127274	0.0110061	0.0125306	0.0117484		0.0427258	0.0370587	0.0420659	0.0395551
409	0.0136488	0.0118048	0.0134404	0.0126009		0.0458105	0.0397416	0.0451075	0.0424102
410	0.0119531	0.0103399	0.0117694	0.0110376		0.0401003	0.0347919	0.0394834	0.0371304
411	0.0129823	0.0112307	0.0127828	0.0119884		0.0435293	0.0377617	0.042855	0.0403155
412	0.0139894	0.0121058	0.0137753	0.0129223		0.0468722	0.0406742	0.0461548	0.0434145
413	0.0136417	0.0118032	0.0134314	0.0126		0.0457244	0.0396699	0.0450214	0.0423528
414	0.0138538	0.0119883	0.0136402	0.0127974		0.0463987	0.0402725	0.0456813	0.0429841
415	0.0139303	0.0120574	0.0137161	0.0128716		0.0466283	0.0404733	0.0459109	0.0432136
416	0.0142288	0.0123195	0.0140101	0.0131514		0.0475895	0.0413198	0.0468578	0.0441032
417	0.0139075	0.0120417	0.0136933	0.0128542		0.0464991	0.0403872	0.0457961	0.0430989
418	0.0136747	0.0118411	0.0134655	0.0126403		0.0457244	0.0396986	0.0450214	0.0423815
419	0.0138837	0.0120238	0.0136694	0.0128339		0.0463987	0.0403012	0.0456813	0.0430128
420	0.0138473	0.0119942	0.0136355	0.0128031		0.0462696	0.0401864	0.0455666	0.042898
421	0.0145232	0.0125807	0.0143007	0.0134288		0.0485077	0.0421376	0.0477617	0.0449783
422	0.0138344	0.0119847	0.0136213	0.0127925		0.0461978	0.040129	0.0454805	0.0428406
423	0.0135488	0.0117382	0.0133401	0.0125302		0.0452222	0.0392969	0.0445336	0.0419367
424	0.0143577	0.0124401	0.0141376	0.0132801		0.0479195	0.0416354	0.0471878	0.0444475
425	0.0143792	0.01246	0.0141566	0.0133008		0.0479625	0.0416785	0.0472165	0.0444905
426	0.0140594	0.0121865	0.0138425	0.0130091		0.0468578	0.0407316	0.0461261	0.0434719
427	0.0138136	0.0119754	0.0136016	0.0127829		0.0460257	0.0400142	0.0453227	0.0427115
428	0.0134718	0.0116774	0.0132626	0.0124641		0.0448922	0.0390243	0.0441892	0.0416498
429	0.0128082	0.0111056	0.0126108	0.0118557		0.0426397	0.037073	0.0419798	0.0395695
430	0.0112359	0.00974315	0.0110626	0.0104014		0.0373887	0.0325107	0.0368148	0.0347058
431	0.011143	0.00966081	0.0109703	0.0103136		0.0370874	0.0322524	0.0365135	0.0344188
432	0.0144422	0.0125263	0.0142182	0.0133715		0.0480343	0.0417789	0.0472882	0.044591
433	0.0145573	0.0126272	0.0143332	0.0134783		0.048393	0.0420946	0.0476469	0.0449353
434	0.013533	0.0117373	0.0133235	0.0125307		0.0449927	0.039139	0.044304	0.0417789
435	0.0141434	0.0122668	0.0139263	0.0130956		0.04703	0.0409037	0.0463126	0.0436727
436	0.0159898	0.0138731	0.0157435	0.0148084		0.0531275	0.0462265	0.0523097	0.0493399
437	0.0158332	0.0137405	0.0155887	0.0146672		0.052568	0.0457387	0.0517502	0.0488234
438	0.0144631	0.0125527	0.0142401	0.0133997		0.0479912	0.0417646	0.0472452	0.0445766
439	0.0149356	0.0129593	0.014705	0.0138345		0.0496125	0.0431706	0.0488521	0.0460831
440	0.015466	0.0134209	0.0152259	0.0143279		0.0513341	0.044677	0.050545	0.0476899
441	0.0161034	0.0139796	0.0158543	0.0149236		0.0534001	0.0464848	0.0525823	0.0496268
442	0.0173117	0.0150292	0.0170417	0.0160453		0.0573886	0.0499711	0.0564991	0.0533427
443	0.016853	0.0146274	0.0165918	0.0156162		0.0559109	0.0486655	0.05505	0.051951
444	0.0172655	0.0149876	0.0169968	0.0160006		0.0572451	0.0498277	0.0563556	0.0531992
445	0.0168876	0.0146588	0.0166253	0.0156483		0.0560256	0.048766	0.0551505	0.0520515
446	0.0161837	0.0140523	0.0159338	0.015001		0.0536297	0.0466856	0.0527975	0.049842
447	0.0175583	0.0152501	0.0172857	0.0162793		0.0581347	0.0506311	0.0572308	0.0540457
448	0.0178129	0.0154672	0.0175371	0.0165115		0.0590242	0.0513915	0.0581203	0.0548635
449	0.0179729	0.0156117	0.0176956	0.0166676		0.0594833	0.0518076	0.0585651	0.0553083
450	0.0185384	0.0161056	0.0182503	0.0171935		0.0613197	0.0534145	0.0603728	0.0570156
451	0.0192648	0.0167375	0.0189653	0.0178678		0.0637014	0.0554948	0.0627258	0.0592394
452	0.0185976	0.0161589	0.0183082	0.0172512		0.0614919	0.0535723	0.0605306	0.0571878
453	0.0175283	0.0152304	0.017256	0.0162612		0.0579338	0.0504733	0.0570299	0.0538879
454	0.0183516	0.0159503	0.0180661	0.0170277		0.0606167	0.0528262	0.0596698	0.0563843
455	0.0184899	0.0160696	0.0182012	0.0171546		0.0610758	0.0532279	0.0601289	0.0568147
456	0.0189806	0.0164984	0.0186866	0.0176133		0.0626827	0.0546196	0.0617071	0.0583068
457	0.0193501	0.0168213	0.0190491	0.0179579		0.0638879	0.0556813	0.0628979	0.0594403
458	0.0187084	0.01626	0.0184156	0.017359		0.0617932	0.0538449	0.0608319	0.057489
459	0.0186715	0.0162309	0.0183804	0.0173282		0.0616497	0.0537301	0.0606885	0.0573599
460	0.0187587	0.0163054	0.0184656	0.017409		0.0619367	0.0539883	0.0609754	0.0576325
461	0.019234	0.0167196	0.018932	0.0178512		0.0635005	0.0553513	0.0625106	0.0590816
462	0.01944	0.0169016	0.0191354	0.018046		0.0641318	0.0559109	0.0631418	0.0596842
463	0.0192974	0.0167754	0.0189966	0.0179108		0.0637014	0.0555235	0.0627114	0.0592681
464	0.0190274	0.0165448	0.0187293	0.0176634		0.0627545	0.05472	0.0617788	0.0584073
465	0.0188473	0.0163931	0.0185535	0.0175025		0.0621088	0.0541605	0.0611476	0.057819
466	0.0190891	0.0166053	0.0187908	0.0177288		0.0628692	0.0548348	0.0618936	0.0585364
467	0.0187449	0.0163035	0.0184517	0.0174066		0.0617645	0.0538592	0.0608032	0.0575034
468	0.0190197	0.0165432	0.018722	0.0176622		0.062654	0.0546483	0.0616784	0.0583355
469	0.0191799	0.0166835	0.0188791	0.0178133		0.0631705	0.0550931	0.0621806	0.058809
470	0.0186001	0.0161792	0.018308	0.0172742		0.0612624	0.0534288	0.0603011	0.0570443
471	0.0186265	0.0162036	0.0183339	0.0173006		0.0613341	0.0535005	0.0603728	0.057116
472	0.0196613	0.0171042	0.0193533	0.0182628		0.0647487	0.0564704	0.0637301	0.0602867
473	0.0194486	0.0169196	0.0191438	0.0180642		0.0640457	0.0558535	0.0630414	0.0596268
474	0.0194918	0.0169531	0.0191858	0.0181006		0.0642179	0.0560113	0.0632279	0.0597989
475	0.0197273	0.0171563	0.019418	0.0183191		0.065007	0.0566856	0.0639883	0.0605163
476	0.0192264	0.0167209	0.0189241	0.0178539		0.063357	0.0552509	0.0623814	0.0589955
477	0.0193469	0.0168249	0.019042	0.0179649		0.0637731	0.0556096	0.0627688	0.0593685
478	0.0199269	0.0173304	0.019611	0.0185047		0.0656669	0.0572595	0.0646339	0.0611332
479	0.0198317	0.0172495	0.0195157	0.0184189		0.0653369	0.0569869	0.0643039	0.0608463
480	0.0198944	0.0173061	0.0195781	0.0184801		0.0655235	0.0571591	0.0645048	0.0610328
481	0.020316	0.0176746	0.0199914	0.0188753		0.0668721	0.0583499	0.0658247	0.0622953
482	0.0204704	0.0178131	0.0201431	0.0190223		0.0673455	0.0587659	0.0662839	0.0627401
483	0.0202745	0.0176459	0.0199503	0.0188451		0.0666425	0.0581634	0.0655952	0.0621088
484	0.0198937	0.0173163	0.019576	0.0184917		0.0653656	0.0570586	0.064347	0.060918
485	0.0189659	0.0165093	0.0186628	0.0176306		0.0623097	0.0543901	0.0613341	0.0580773
486	0.016605	0.0144565	0.0163415	0.0154384		0.0545335	0.0476039	0.0536871	0.050832
487	0.0174425	0.0151864	0.0171638	0.0162172		0.0572595	0.0499855	0.0563556	0.0533714
488	0.0191499	0.016672	0.0188457	0.0178043		0.0628836	0.0548922	0.0618936	0.0586081
489	0.0192243	0.0167352	0.0189193	0.0178719		0.0631562	0.0551218	0.0621662	0.058852
490	0.0203006	0.0176754	0.0199764	0.0188753		0.0666425	0.0581777	0.0655952	0.0621232
491	0.0200211	0.017436	0.0197012	0.0186197		0.0656813	0.0573599	0.0646483	0.0612337
492	0.0189455	0.0165004	0.0186429	0.0176205		0.0621519	0.0542753	0.0611763	0.0579482
493	0.0196016	0.0170712	0.0192887	0.0182307		0.0642896	0.0561404	0.0632853	0.0599424
494	0.0198203	0.0172613	0.019503	0.0184336		0.0650213	0.0567717	0.0639883	0.0606167
495	0.0200259	0.0174401	0.0197047	0.0186245		0.0656813	0.0573599	0.0646483	0.061248
496	0.0201896	0.0175829	0.0198652	0.0187769		0.0662265	0.0578334	0.0651791	0.0617358
497	0.0205667	0.0179117	0.0202358	0.0191305		0.067446	0.0588951	0.0663843	0.0628836
498	0.019671	0.0171354	0.0193558	0.018301		0.0644905	0.0563269	0.0634718	0.0601433
499	0.0199857	0.0174099	0.0196622	0.0185952		0.0655235	0.0572308	0.0644761	0.0611045
500	0.0194578	0.0169471	0.0191413	0.0181019		0.0638018	0.0557243	0.0627831	0.0594977
501	0.0191389	0.0166679	0.0188261	0.0178041		0.0627831	0.0548205	0.0617788	0.0585507
502	0.0188778	0.0164354	0.0185687	0.0175562		0.0619941	0.0541318	0.0610041	0.0578047
503	0.0196498	0.017101	0.0193268	0.0182683		0.0646052	0.0563987	0.0635722	0.0602294
504	0.0189578	0.0164729	0.0186453	0.0175983		0.062654	0.0546053	0.0616497	0.0583068
505	0.0199115	0.0173266	0.0195837	0.0185092		0.0655091	0.0571734	0.0644474	0.0610471
506	0.0205694	0.0178964	0.0202302	0.0191195		0.0676899	0.0590672	0.0665995	0.0630844
507	0.0195901	0.0170443	0.0192675	0.0182096		0.0644761	0.0562552	0.0634431	0.0600859
508	0.0190406	0.0165721	0.0187276	0.0177041		0.0625966	0.054634	0.0615923	0.0583499
509	0.0196241	0.0170821	0.0193003	0.0182486		0.0644618	0.0562839	0.0634288	0.0601002
510	0.0195658	0.0170346	0.0192444	0.0181975		0.0642466	0.056083	0.0632136	0.0598994
511	0.0201727	0.0175683	0.0198416	0.0187672		0.0661691	0.0577903	0.0651074	0.0617071
512	0.0204524	0.0178145	0.0201167	0.0190324		0.0670586	0.0585651	0.0659826	0.0625536
513	0.0194172	0.0169159	0.0190975	0.0180705		0.0636296	0.0555952	0.062611	0.0593685
514	0.019336	0.0168459	0.0190181	0.0179968		0.0633427	0.055337	0.062324	0.0590959
515	0.0191893	0.0167199	0.0188727	0.0178615		0.0628549	0.0549209	0.0618506	0.0586512
516	0.01919	0.01672	0.018872	0.0178622		0.0628549	0.0549209	0.0618362	0.0586512
517	0.0170875	0.0148897	0.0168059	0.0159069		0.0559539	0.0488951	0.05505	0.0522236
518	0.0179954	0.0156793	0.0176977	0.016751		0.0589381	0.0514919	0.0579912	0.0549926
519	0.0189035	0.0164697	0.0185899	0.0175967		0.0619223	0.0541031	0.060918	0.057776
520	0.0196305	0.0171037	0.0193059	0.0182733		0.0643039	0.0561835	0.063271	0.0599998
521	0.0198673	0.0173105	0.0195369	0.0184954		0.0650787	0.0568578	0.064017	0.0607315
522	0.0199343	0.0173681	0.0196032	0.0185574		0.0653082	0.0570586	0.0642466	0.0609324
523	0.0196235	0.017098	0.0192956	0.0182671		0.0642896	0.0561691	0.0632423	0.0599855
524	0.0203617	0.0177378	0.0200215	0.0189531		0.0667286	0.0582925	0.0656526	0.0622667
525	0.0206305	0.0179681	0.0202843	0.0191998		0.0676612	0.0590959	0.0665565	0.0631275
526	0.0197732	0.017221	0.0194393	0.0184037		0.0648491	0.0566426	0.0637874	0.060502
527	0.0186785	0.0162664	0.0183605	0.017383		0.0612767	0.0535292	0.0602724	0.0571734
528	0.0198164	0.0172568	0.0194808	0.0184438		0.0650213	0.0568004	0.0639596	0.0606741
529	0.0209344	0.0182286	0.020577	0.0194823		0.0687085	0.0600141	0.0675751	0.0641031
530	0.0206862	0.0180116	0.0203332	0.0192508		0.0679051	0.0592968	0.066786	0.063357
531	0.0210463	0.0183264	0.0206856	0.0195879		0.0690959	0.0603441	0.0679481	0.0644618
532	0.0203725	0.0177374	0.0200227	0.0189595		0.0668721	0.0584073	0.0657674	0.0623958
533	0.0198188	0.0172579	0.0194773	0.0184452		0.06505	0.0568147	0.063974	0.0607028
534	0.0204516	0.0178098	0.0201003	0.0190365		0.067116	0.0586225	0.0659969	0.0626253
535	0.0209366	0.0182345	0.0205774	0.01949		0.0686798	0.0599998	0.0675464	0.0640887
536	0.0211624	0.018431	0.0207995	0.0197012		0.0694115	0.0606311	0.0682638	0.0647774
537	0.0203642	0.0177383	0.0200142	0.0189596		0.0667717	0.0583355	0.0656669	0.062324
538	0.0207501	0.0180745	0.020393	0.0193187		0.0680342	0.0594403	0.0669008	0.0635005
539	0.0206115	0.0179519	0.0202557	0.0191897		0.0675894	0.0590385	0.066456	0.0630844
540	0.0197791	0.0172253	0.0194386	0.0184141		0.0648778	0.0566713	0.0638018	0.060545
541	0.0198831	0.0173081	0.0195396	0.0185015		0.0653226	0.0570299	0.0642322	0.0609324
542	0.0205366	0.0178759	0.0201807	0.0191068		0.067489	0.0589238	0.0663699	0.0629553
543	0.0204446	0.0178043	0.0200897	0.0190325		0.0670873	0.0585938	0.0659682	0.062611
544	0.0207883	0.0180955	0.0204271	0.0193455		0.0682925	0.0596268	0.0671447	0.0637157
545	0.0207841	0.0180959	0.0204228	0.0193449		0.0682494	0.0596124	0.067116	0.063687
546	0.0208478	0.018143	0.0204842	0.0193953		0.0685507	0.059842	0.0674029	0.0639453
547	0.0209365	0.0182269	0.020572	0.0194866		0.0687659	0.0600572	0.0676181	0.0641605
548	0.020748	0.0180653	0.0203853	0.0193126		0.0681059	0.0594833	0.0669725	0.0635579
549	0.0208714	0.0181768	0.0205072	0.0194325		0.068479	0.0598276	0.0673312	0.0639166
550	0.021182	0.0184484	0.0208133	0.0197245		0.0694833	0.0607028	0.0683212	0.0648635
551	0.0209875	0.0182804	0.0206201	0.019544		0.0688233	0.0601289	0.0676612	0.0642466
552	0.0211844	0.0184523	0.020813	0.0197293		0.0694546	0.0606741	0.0682925	0.0648348
553	0.0208424	0.0181549	0.0204768	0.0194104		0.0683355	0.0597129	0.0671877	0.0638018
554	0.0213919	0.0186325	0.0210159	0.0199222		0.0701432	0.0612767	0.0689524	0.0654804
555	0.0214826	0.0187105	0.0211034	0.020006		0.0704445	0.0615349	0.0692537	0.0657674
556	0.0212467	0.0185063	0.0208719	0.0197873		0.0696698	0.060875	0.0684933	0.06505
557	0.0206314	0.0179682	0.0202662	0.0192141		0.0676612	0.0591103	0.0665278	0.0631705
558	0.0205218	0.0178709	0.0201578	0.0191104		0.0673312	0.058809	0.0661834	0.0628549
559	0.0201899	0.0175806	0.019831	0.0188003		0.0662552	0.0578764	0.0651361	0.0618506
560	0.0204964	0.0178465	0.0201298	0.0190852		0.0672738	0.0587659	0.066126	0.0627975
561	0.0208165	0.018127	0.0204446	0.0193855		0.0683355	0.0596985	0.0671734	0.0638018
562	0.0207196	0.0180399	0.0203477	0.0192933		0.0680342	0.0594259	0.0668721	0.0635149
563	0.0213378	0.0185744	0.0209535	0.0198664		0.0701002	0.0612193	0.068895	0.065423
564	0.0207983	0.0181038	0.0204235	0.0193632		0.0683498	0.0596842	0.0671734	0.0638018
565	0.0206724	0.0179922	0.0202973	0.0192446		0.0679481	0.0593398	0.066786	0.0634288
566	0.0204262	0.0177772	0.0200567	0.0190168		0.067159	0.0586368	0.0659969	0.0626827
567	0.0208519	0.018146	0.0204728	0.019409		0.0685937	0.059885	0.0674029	0.0640027
568	0.0206296	0.0179393	0.0202539	0.0191906		0.0680055	0.0593398	0.066829	0.0634288
569	0.0199692	0.0173386	0.0196044	0.0185471		0.0661547	0.0576469	0.065007	0.061621
570	0.0201293	0.0174872	0.0197611	0.0187076		0.0665565	0.0580342	0.0654087	0.0620371
571	0.0202023	0.0175652	0.0198336	0.018791		0.0666425	0.0581347	0.0654804	0.0621519
572	0.0206331	0.0179244	0.0202551	0.0191747		0.0682494	0.0594977	0.0670586	0.0636009
573	0.020936	0.0181895	0.0205539	0.0194583		0.0692394	0.0603728	0.0680342	0.0645335
574	0.0209451	0.0181967	0.0205612	0.0194667		0.0692681	0.0603872	0.0680629	0.0645478
575	0.0205959	0.0178899	0.0202186	0.0191388		0.0681346	0.0593972	0.0669582	0.0635005
576	0.0204758	0.0177884	0.0201003	0.0190292		0.0677186	0.0590385	0.0665421	0.0631131
577	0.0207441	0.0180234	0.0203647	0.0192803		0.0685794	0.0597989	0.0673886	0.0639166
578	0.0205094	0.0178266	0.0201345	0.0190699		0.0677186	0.0590672	0.0665421	0.0631418
579	0.0206276	0.0179349	0.02025	0.0191862		0.0680199	0.0593398	0.0668434	0.0634431
580	0.0210164	0.0182824	0.0206345	0.0195566		0.0691963	0.0604015	0.0680055	0.0645622
581	0.0211442	0.0183998	0.0207597	0.0196822		0.0695407	0.0607172	0.0683355	0.0648922
582	0.0215538	0.0187634	0.0211633	0.0200703		0.0708176	0.0618506	0.069598	0.0661117
583	0.0216294	0.0188326	0.0212357	0.0201437		0.0710041	0.0620227	0.0697702	0.0662839
584	0.0218202	0.0189996	0.0214245	0.0203235		0.0716066	0.0625536	0.0703728	0.0668577
585	0.0212987	0.0185475	0.0209128	0.0198383		0.069885	0.0610471	0.0686798	0.0652509
586	0.0208357	0.0181386	0.0204577	0.0194018		0.0684072	0.0597416	0.0672308	0.0638592
587	0.0211968	0.0184427	0.0208138	0.0197259		0.0697559	0.0608893	0.0685507	0.0650787
588	0.0202708	0.0175917	0.0199055	0.0188162		0.0672595	0.0585794	0.0661117	0.062611
589	0.0174356	0.0150783	0.0171199	0.0161261		0.0584647	0.0508176	0.0574604	0.0543183
590	0.0182678	0.015796	0.0179385	0.0168961		0.0613054	0.0532279	0.060258	0.0569008
591	0.0196492	0.0170181	0.0192931	0.0182012		0.0656239	0.0570443	0.0644905	0.0609611
592	0.0193249	0.0167278	0.018974	0.0178924		0.0646196	0.0561691	0.0635005	0.0600285
593	0.0199598	0.0173098	0.0195966	0.0185162		0.0663556	0.0577616	0.0652078	0.0617502
594	0.0198129	0.0171772	0.0194522	0.0183734		0.0659539	0.0573743	0.0648061	0.0613341
595	0.0191527	0.0165761	0.0188029	0.0177319		0.0641031	0.0556813	0.0629984	0.0595263
596	0.0204292	0.0177341	0.0200551	0.0189719		0.0677186	0.0589955	0.0665421	0.0630701
597	0.020216	0.0175429	0.019844	0.0187684		0.0670873	0.0584216	0.0659252	0.0624675
598	0.020323	0.0176467	0.019948	0.0188811		0.0673025	0.0586368	0.066126	0.0626971
599	0.020491	0.0178042	0.0201123	0.0190494		0.0677186	0.0590529	0.0665421	0.0631275
600	0.0207373	0.0180365	0.020353	0.0192983		0.0683068	0.0596124	0.067116	0.0637301
601	0.0207426	0.0180545	0.0203567	0.0193185		0.068149	0.059512	0.0669438	0.0636296
602	0.0206677	0.017995	0.0202837	0.0192542		0.067862	0.0592681	0.0666712	0.0633714
603	0.0210798	0.0183568	0.0206879	0.0196424		0.0691533	0.0604159	0.0679338	0.0645909
604	0.0214711	0.0187007	0.0210727	0.0200094		0.0704158	0.0615206	0.069182	0.0657817
605	0.0214135	0.0186529	0.0210176	0.019958		0.0701863	0.0613341	0.0689524	0.0655665
606	0.0213744	0.0186234	0.0209784	0.0199244		0.0699998	0.0611763	0.0687803	0.0654087
607	0.0216306	0.0188517	0.0212315	0.0201682		0.0707889	0.0618793	0.069555	0.0661547
608	0.0214277	0.018677	0.0210337	0.0199823		0.0700859	0.0612624	0.0688663	0.0654948
609	0.0214956	0.0187387	0.0211009	0.0200474		0.0702724	0.0614345	0.0690529	0.0656813
610	0.021347	0.0186105	0.0209569	0.019909		0.0697559	0.0610041	0.0685507	0.0652078
611	0.0214922	0.0187389	0.0210996	0.0200451		0.070215	0.0613915	0.0689955	0.0656239
612	0.0214397	0.018695	0.0210497	0.019997		0.0700285	0.061248	0.0688233	0.0654661
613	0.0211917	0.0184789	0.020807	0.019765		0.0692107	0.0605306	0.0680199	0.0646913
614	0.0209258	0.018249	0.0205475	0.0195197		0.0683068	0.0597416	0.0671447	0.0638592
615	0.021413	0.018676	0.0210258	0.0199756		0.0698706	0.0611189	0.0686655	0.0653226
616	0.0207307	0.0180839	0.0203576	0.0193404		0.0676181	0.0591533	0.066456	0.0632136
617	0.0207114	0.0180665	0.0203391	0.0193223		0.0675464	0.0590816	0.0663843	0.0631418
618	0.0215304	0.0187833	0.0211457	0.0200876		0.0702006	0.0614202	0.0690098	0.0656382
619	0.0213398	0.0186181	0.0209591	0.0199103		0.0695694	0.0608606	0.0683785	0.06505
620	0.0214873	0.0187447	0.0211041	0.0200457		0.0700715	0.061291	0.0688807	0.0655091
621	0.0215132	0.0187636	0.0211302	0.0200644		0.0702006	0.0614058	0.0690098	0.0656239
622	0.0211454	0.0184294	0.0207699	0.0197069		0.0691533	0.0604446	0.0679768	0.0646052
623	0.02071	0.0180389	0.0203426	0.0192889		0.0678764	0.0592968	0.0667286	0.0633714
624	0.0204518	0.0178194	0.0200883	0.019055		0.0669582	0.0585077	0.0658104	0.0625249
625	0.0205583	0.017922	0.0201957	0.0191628		0.0672021	0.0587516	0.0660686	0.0627831
626	0.0208959	0.0182145	0.020527	0.0194768		0.0683068	0.0597129	0.067159	0.0638161
627	0.0210775	0.0183602	0.0207051	0.0196318		0.0690529	0.0603298	0.0678907	0.0644761
628	0.01991	0.0172713	0.0195593	0.0184665		0.066126	0.0575608	0.065007	0.0615206
629	0.0207075	0.0180139	0.0203441	0.0192595		0.068149	0.059469	0.0670012	0.0635435
630	0.0204025	0.0177544	0.0200442	0.018982		0.0670729	0.0585507	0.0659395	0.0625536
631	0.0208792	0.0181962	0.0205132	0.0194544		0.0682925	0.0596842	0.0671447	0.0637731
632	0.0204967	0.0178578	0.020138	0.0190921		0.0671016	0.0586225	0.0659682	0.0626397
633	0.0212254	0.0185104	0.020856	0.0197898		0.0692824	0.0605737	0.0681203	0.0647344
634	0.0210879	0.0184013	0.0207203	0.0196733		0.0686798	0.0600859	0.0675321	0.0642035
635	0.0214116	0.0186876	0.0210394	0.019977		0.0696985	0.0609898	0.0685364	0.0651648
636	0.0211476	0.018462	0.0207812	0.0197356		0.0687803	0.0602007	0.0676325	0.0643183
637	0.0214893	0.0187619	0.0211172	0.0200556		0.0698706	0.0611619	0.0687085	0.0653369
638	0.0217618	0.0190075	0.0213858	0.0203189		0.0706454	0.0618506	0.0694689	0.066083
639	0.0215449	0.0188216	0.0211732	0.0201181		0.0698993	0.0612193	0.0687372	0.0653943
640	0.0213761	0.0186784	0.021008	0.0199643		0.0692968	0.0606885	0.068149	0.0648491
641	0.021382	0.0186863	0.021015	0.0199718		0.0692824	0.0606885	0.068149	0.0648348
642	0.0213224	0.0186377	0.0209572	0.0199208		0.0690529	0.0604876	0.0679051	0.0646196
643	0.0215833	0.0188635	0.0212158	0.0201611		0.069928	0.0612624	0.0687803	0.0654374
644	0.0215549	0.0188406	0.0211868	0.0201366		0.0697846	0.0611332	0.0686368	0.0653082
645	0.0215341	0.0188158	0.0211671	0.0201098		0.0698133	0.0611476	0.0686655	0.0653226
646	0.020779	0.0181282	0.0204251	0.0193736		0.0677186	0.0592251	0.0665995	0.063271
647	0.0201868	0.0175712	0.0198453	0.0187778		0.0662839	0.0578621	0.0652078	0.0618075
648	0.0200927	0.0174768	0.0197516	0.0186776		0.0661117	0.0576612	0.0650213	0.0615923
649	0.0197812	0.0172122	0.019447	0.018393		0.0650213	0.0567286	0.0639453	0.0606024
650	0.0203785	0.0177851	0.0200337	0.0190051		0.0663269	0.0580199	0.0652365	0.0619797
651	0.021358	0.0186491	0.0209976	0.0199288		0.0694115	0.0607459	0.0682781	0.0648922
652	0.0198077	0.017226	0.0194744	0.0184076		0.0652222	0.0568721	0.0641605	0.0607459
653	0.0211028	0.0184259	0.0207482	0.0196898		0.0685794	0.0600141	0.0674603	0.0641031
654	0.0209207	0.0182694	0.0205699	0.0195218		0.0679481	0.059469	0.0668434	0.0635292
655	0.019914	0.0173666	0.0195793	0.0185561		0.0649639	0.056786	0.0639022	0.0606454
656	0.0177592	0.0154953	0.017463	0.016558		0.0578334	0.0505737	0.0568865	0.054017
657	0.018222	0.0159006	0.0179174	0.0169901		0.0593398	0.0518937	0.0583642	0.0554374
658	0.0206127	0.0180056	0.0202685	0.0192388		0.0668721	0.0585364	0.0657817	0.0625249
659	0.0208081	0.0181793	0.0204607	0.0194247		0.0674747	0.0590816	0.0663699	0.0630988
660	0.0208504	0.0182138	0.0205032	0.0194608		0.0676468	0.0592251	0.0665421	0.0632566
661	0.0209764	0.0183211	0.0206267	0.0195741		0.0680916	0.0596124	0.0669869	0.0636583
662	0.0209986	0.0183306	0.0206498	0.0195848		0.0682781	0.0597416	0.0671734	0.0638161
663	0.0206814	0.0180596	0.0203383	0.0192959		0.067159	0.0587803	0.0660686	0.0627831
664	0.0211161	0.0184601	0.0207672	0.0197227		0.0683355	0.0598563	0.0672308	0.0639309
665	0.0212494	0.0185884	0.0208981	0.019859		0.0686081	0.0601289	0.0675034	0.0642179
666	0.0213928	0.0187231	0.0210392	0.0200021		0.0689524	0.0604589	0.0678333	0.0645622
667	0.021457	0.0187852	0.0211021	0.0200691		0.0690672	0.0605737	0.0679481	0.0646913
668	0.0215344	0.0188597	0.0211789	0.0201487		0.0692394	0.0607459	0.0681203	0.0648778
669	0.0218993	0.0191815	0.0215384	0.0204919		0.0703871	0.0617502	0.0692537	0.0659539
670	0.0218468	0.0191385	0.0214871	0.0204441		0.0701863	0.0615923	0.0690529	0.0657674
671	0.0218718	0.0191638	0.0215127	0.0204697		0.0702437	0.0616497	0.0691102	0.0658247
672	0.0217148	0.0190263	0.0213593	0.0203246		0.0697272	0.0611906	0.0686081	0.0653513
673	0.0220719	0.0193391	0.0217104	0.0206579		0.0708462	0.0621806	0.0697128	0.0663986
674	0.02202	0.0192963	0.0216603	0.0206119		0.0706597	0.0620227	0.0695407	0.0662408
675	0.0218479	0.0191466	0.0214912	0.0204512		0.0701002	0.0615349	0.0689811	0.06571
676	0.0220236	0.019301	0.0216645	0.0206167		0.0706454	0.0620084	0.0695263	0.0662265
677	0.0218287	0.019132	0.0214738	0.0204343		0.0700141	0.0614632	0.068895	0.0656239
678	0.0219106	0.0192035	0.021554	0.0205115		0.0702724	0.0616784	0.0691533	0.0658678
679	0.0215841	0.0189183	0.0212335	0.0202071		0.0692107	0.0607602	0.0681059	0.0648778
680	0.0217862	0.0190966	0.0214326	0.0203973		0.0698563	0.0613197	0.0687372	0.0654804
681	0.0216717	0.0189959	0.0213198	0.0202899		0.0694833	0.0609898	0.0683785	0.0651361
682	0.0216736	0.0189982	0.0213224	0.0202912		0.0694833	0.0610041	0.0683785	0.0651361
683	0.0216576	0.0189844	0.0213087	0.020277		0.0694402	0.0609611	0.0683355	0.065093
684	0.0215664	0.0189021	0.02122	0.0201894		0.0691533	0.0607028	0.0680629	0.0648204
685	0.0217986	0.0191089	0.0214462	0.020409		0.0698706	0.0613341	0.0687516	0.0654948
686	0.0216864	0.0190083	0.0213358	0.020301		0.0695407	0.0610471	0.0684359	0.0651791
687	0.0159385	0.0136344	0.0156807	0.0145616		0.0552652	0.0475321	0.0543901	0.0507602
688	0.0179593	0.0155143	0.0176712	0.0165689		0.0604159	0.0524102	0.059469	0.0559539
689	0.0180109	0.0155635	0.0177216	0.0166208		0.060545	0.0525249	0.0595837	0.056083
690	0.0186532	0.0161668	0.0183541	0.0172664		0.0620945	0.0540027	0.0611045	0.0576612
691	0.0192894	0.0167685	0.0189792	0.0179082		0.0635722	0.0554374	0.0625679	0.059182
692	0.0194389	0.0169203	0.0191276	0.01807		0.0638018	0.0556813	0.0627975	0.0594546
693	0.0183601	0.0159424	0.0180668	0.0170249		0.0606167	0.0530127	0.0596555	0.0565995
694	0.0178074	0.0154521	0.0175223	0.0165017		0.0589094	0.0513772	0.0579769	0.0548492
695	0.0189637	0.0165105	0.0186604	0.0176309		0.0621806	0.0542179	0.061205	0.0578908
696	0.0190124	0.0165554	0.0187078	0.0176798		0.0622953	0.0543327	0.0613054	0.0580055
697	0.0209361	0.018309	0.0206023	0.0195529		0.0676325	0.0592537	0.0665708	0.063271
698	0.0205946	0.018007	0.0202658	0.0192283		0.0665708	0.0583212	0.0655235	0.0622667
699	0.0195761	0.0170584	0.0192644	0.0182152		0.0640314	0.0558535	0.0630271	0.0596268
700	0.0193159	0.0168306	0.0190093	0.0179738		0.0631275	0.0551505	0.0621375	0.0588807
701	0.0188688	0.0164105	0.0185693	0.0175228		0.0620658	0.0541462	0.0610902	0.057819
702	0.0192525	0.0167664	0.0189457	0.0179048		0.0630414	0.05505	0.0620514	0.0587803
703	0.0193953	0.0169076	0.0190874	0.0180546		0.0632566	0.0553226	0.0622667	0.0590672
704	0.0203964	0.0178149	0.0200737	0.0190242		0.0661547	0.0578764	0.0651217	0.0617932
705	0.0202326	0.0176494	0.0199119	0.018846		0.0659252	0.0576325	0.0648922	0.0615349
706	0.0204503	0.0178567	0.0201249	0.0190679		0.0663986	0.0580916	0.0653513	0.0620227
707	0.0204915	0.0178974	0.0201672	0.0191114		0.0664991	0.0581777	0.0654517	0.0621232
708	0.0205666	0.0179594	0.0202392	0.0191776		0.0667573	0.0584216	0.06571	0.0623671
709	0.0209176	0.018301	0.0205857	0.0195408		0.0674747	0.0591246	0.066413	0.0631275
710	0.0207639	0.018147	0.0204344	0.0193775		0.0672308	0.0588664	0.0661691	0.0628549
711	0.0208766	0.0182585	0.0205465	0.0194952		0.0674316	0.0590816	0.0663699	0.0630701
712	0.0209673	0.0183524	0.0206348	0.0195974		0.0675321	0.0591964	0.0664704	0.0631992
713	0.020664	0.0180722	0.020338	0.0192974		0.066743	0.058479	0.0656956	0.0624245
714	0.020797	0.0181935	0.0204675	0.0194256		0.067116	0.058809	0.0660686	0.0627831
715	0.0198299	0.0173122	0.0195174	0.0184848		0.0644331	0.05637	0.0634288	0.060172
716	0.0197246	0.0172091	0.019413	0.0183752		0.0642322	0.0561548	0.0632279	0.0599568
717	0.0151919	0.0130801	0.0149512	0.013965		0.0512767	0.0447918	0.0504733	0.0478191
718	0.013613	0.0116448	0.013397	0.0124344		0.0471161	0.0404159	0.04637	0.0431562
719	0.0125136	0.0107099	0.0123163	0.0114353		0.0432423	0.0370874	0.042568	0.0395981
720	0.0129123	0.0110177	0.0127092	0.0117636		0.0450357	0.0385508	0.0443327	0.0411476
721	0.0154647	0.0133433	0.0152225	0.0142467		0.0521519	0.0451075	0.0513485	0.0481634
722	0.0189214	0.0164748	0.0186228	0.0175922		0.0619654	0.0541318	0.0609898	0.0577903
723	0.0169869	0.0147136	0.0167199	0.0157104		0.0565852	0.0491247	0.05571	0.0524389
724	0.0145951	0.0125617	0.0143649	0.0134118		0.0495838	0.0427832	0.048809	0.045667
725	0.0139702	0.0119767	0.0137494	0.0127874		0.0480343	0.0413055	0.0472882	0.0440888
726	0.0148525	0.0127803	0.0146198	0.0136459		0.0504589	0.0436154	0.0496698	0.0465565
727	0.0155248	0.0133863	0.0152803	0.0142938		0.0524389	0.0453227	0.0516211	0.048393
728	0.0140583	0.0120799	0.0138385	0.0128976		0.0480199	0.0413485	0.0472739	0.0441462
729	0.0153009	0.0132283	0.0150617	0.014123		0.0512767	0.0444475	0.0504733	0.047446
730	0.0159806	0.0137945	0.0157298	0.014728		0.0536871	0.0467	0.0528549	0.0498564
731	0.0151833	0.0131062	0.0149454	0.0139929		0.0508894	0.0444618	0.0501003	0.0474747
732	0.0170587	0.0148054	0.0167915	0.0158072		0.0563126	0.0492394	0.0554374	0.052568
733	0.0187569	0.0163436	0.0184639	0.0174492		0.0612193	0.053644	0.0602724	0.0572595
734	0.0194772	0.0169986	0.0191722	0.0181481		0.0632423	0.0554661	0.0622667	0.0592107
735	0.0189555	0.0165313	0.0186591	0.0176498		0.0616641	0.0541175	0.0607028	0.057776
736	0.0189052	0.0164689	0.0186091	0.0175821		0.0618362	0.0540457	0.060875	0.0576899
737	0.0190155	0.0165736	0.0187179	0.0176953		0.0620084	0.0543327	0.0610471	0.0580055
738	0.0197543	0.0172585	0.019447	0.0184256		0.0640314	0.05604	0.0630414	0.0598133
739	0.0194069	0.0169595	0.0191028	0.0181066		0.0628405	0.055007	0.0618649	0.0587229
740	0.0201802	0.0176618	0.0198651	0.0188561		0.0650213	0.0570012	0.064017	0.0608463
741	0.0201402	0.0176406	0.0198262	0.0188327		0.0647344	0.0567717	0.0637301	0.0606024
742	0.0203505	0.0178414	0.0200325	0.019047		0.0651791	0.0572165	0.0641748	0.0610758
743	0.0209527	0.0183744	0.0206239	0.0196169		0.0670443	0.0588664	0.0659969	0.0628405
744	0.0210274	0.0184503	0.0206986	0.0196993		0.0671303	0.0589812	0.0660973	0.0629553
745	0.0211509	0.0185703	0.0208197	0.0198264		0.0674029	0.0592394	0.0663556	0.0632423
746	0.0212759	0.0186791	0.0209417	0.0199418		0.0678047	0.0595981	0.0667573	0.0636153
747	0.0213764	0.0187705	0.0210428	0.0200418		0.0680916	0.0598563	0.0670299	0.0639022
748	0.0213747	0.0187696	0.0210404	0.0200401		0.0680772	0.0598276	0.0670156	0.0638735
749	0.0211651	0.0185874	0.0208344	0.0198447		0.0673886	0.0592394	0.0663412	0.0632423
750	0.021182	0.0186028	0.0208514	0.0198611		0.067446	0.0592824	0.0663986	0.0632853
751	0.0209947	0.0184377	0.0206658	0.0196845		0.0668434	0.0587516	0.0657961	0.0627258
752	0.0211163	0.0185456	0.0207869	0.0198007		0.0672164	0.0590959	0.0661691	0.0630844
753	0.0212559	0.0186689	0.0209241	0.0199314		0.0676468	0.059469	0.0665995	0.0634862
754	0.0213264	0.0187315	0.0209946	0.0199971		0.0678764	0.0596698	0.066829	0.0637014
755	0.0212297	0.0186463	0.0208991	0.0199058		0.0675751	0.0594116	0.0665278	0.0634144
756	0.0212611	0.0186753	0.0209311	0.0199366		0.0676612	0.0594833	0.0666138	0.0635005
757	0.0213213	0.0187279	0.0209889	0.0199932		0.0678477	0.0596555	0.0668004	0.0636727
758	0.0210887	0.0185207	0.0207605	0.0197726		0.067116	0.0589955	0.066083	0.062984
759	0.0207677	0.0182205	0.0204431	0.0194519		0.0663412	0.0582638	0.0653082	0.0621949
760	0.00573483	0.00455346	0.00564496	0.00486101		0.0239311	0.0192395	0.0235724	0.0205451
761	0.00372673	0.00285937	0.00366951	0.00305249		0.0166284	0.0129411	0.0163701	0.0138149
762	0.0125085	0.0105677	0.012314	0.0112829		0.044964	0.0382639	0.0442753	0.0408463
763	0.00769307	0.00625085	0.00757333	0.00667355		0.0305451	0.0250932	0.0300716	0.0267861
764	0.0102419	0.00851126	0.0100829	0.00908685		0.0385078	0.0322811	0.0379052	0.0344619
765	0.0125661	0.0106163	0.0123728	0.0113335		0.0451935	0.0384504	0.0445049	0.0410472
766	0.0144821	0.0124055	0.0142576	0.0132441		0.0499998	0.0430558	0.0492251	0.0459683
767	0.0174335	0.0151083	0.0171628	0.0161288		0.0580342	0.0504733	0.0571304	0.0538736
768	0.0195228	0.0170602	0.0192196	0.018213		0.0632136	0.0553513	0.062238	0.0590816
769	0.0198285	0.0173602	0.0195198	0.0185329		0.0637874	0.0559396	0.0627975	0.0597129
770	0.0203848	0.0178851	0.020068	0.019094		0.0651217	0.0572021	0.0641174	0.0610615
771	0.0205146	0.018015	0.0201954	0.0192318		0.0653226	0.0574173	0.0643183	0.061291
772	0.0205664	0.0180659	0.020246	0.0192866		0.065423	0.0575177	0.0644044	0.0614058
773	0.0207317	0.0182132	0.0204095	0.0194429		0.0659395	0.0579769	0.0649209	0.0618793
774	0.0206552	0.018146	0.0203342	0.0193725		0.0656813	0.0577473	0.0646626	0.0616497
775	0.0205223	0.0180314	0.0202025	0.0192503		0.0652509	0.0573743	0.0642322	0.061248
776	0.0207999	0.0182746	0.0204753	0.0195111		0.0661117	0.0581347	0.065093	0.0620658
777	0.0205533	0.0180584	0.0202323	0.0192783		0.0653369	0.057446	0.0643183	0.0613197
778	0.0204522	0.0179691	0.0201318	0.0191832		0.0650213	0.0571734	0.0640027	0.0610328
779	0.0204936	0.0180064	0.0201756	0.019224		0.0651504	0.0572882	0.0641461	0.0611619
780	0.0204077	0.0179321	0.0200909	0.0191434		0.0648635	0.0570443	0.0638592	0.0608893
781	0.0204546	0.0179723	0.020136	0.0191874		0.065007	0.0571734	0.0640027	0.0610328
782	0.020605	0.018105	0.0202852	0.0193288		0.0654948	0.0575895	0.0644761	0.0614776
783	0.020271	0.0178124	0.019956	0.0190151		0.0644187	0.0566569	0.0634288	0.0604733
784	0.0203944	0.0179201	0.0200758	0.0191307		0.0647918	0.0569869	0.0637874	0.0608319
785	0.0202075	0.0177502	0.0198931	0.0189501		0.0642896	0.0565134	0.0632853	0.0603298
786	0.0204045	0.01792	0.0200877	0.0191292		0.0649783	0.057116	0.063974	0.0609611
787	0.0197562	0.0173121	0.0194503	0.0184837		0.0633714	0.0555952	0.0623958	0.0593542
788	0.0193829	0.0169686	0.0190812	0.0181149		0.0623671	0.054677	0.0614058	0.0583642
789	0.0192518	0.01684	0.0189523	0.0179786		0.0621232	0.0544188	0.0611619	0.0580916
790	0.0184912	0.0161506	0.0182041	0.0172403		0.0599568	0.0524819	0.0590242	0.0560256
791	0.0189759	0.0166016	0.0186819	0.0177227		0.061205	0.0536153	0.060258	0.0572308
792	0.018943	0.0165824	0.0186508	0.0177024		0.0609754	0.0534432	0.0600428	0.0570586
793	0.0186132	0.0162871	0.0183243	0.0173876		0.0599855	0.0525536	0.0590529	0.0561117
794	0.0194559	0.0170831	0.0191542	0.0182355		0.0619941	0.0544761	0.0610328	0.058149
795	0.0196588	0.0172426	0.0193542	0.0184071		0.0628549	0.0551935	0.0618793	0.0589094
796	0.0184992	0.0161664	0.0182138	0.0172564		0.0598994	0.0524389	0.0589812	0.0559683
797	0.0184817	0.0161371	0.0181954	0.0172282		0.0599998	0.0524532	0.0590816	0.0559969
798	0.0195856	0.0171666	0.0192822	0.018325		0.0627831	0.0550931	0.0618075	0.058809
799	0.0193771	0.016972	0.0190771	0.0181179		0.0622667	0.0546053	0.0613054	0.0582925
800	0.0188892	0.016525	0.0185978	0.0176407		0.0609324	0.0533858	0.0599998	0.0569869

## Sheet: 10degN
10 degrees N latitude	Daily Irradiance (mE cm-2 d-1 nm-1)					Solar Noon Irradiance (mE cm-2 d-1 nm-1)
wavelength (nm)	March 20th	June 21st	September 22nd	December 22nd		March 20th	June 21st	September 22nd	December 22nd
280	3.1046e-17	4.10434e-18	6.10034e-18	7.03641e-19		4.30702e-16	5.64847e-17	8.67716e-17	9.28261e-18
281	8.6267e-16	1.36138e-16	1.95639e-16	2.52016e-17		1.14806e-14	1.7977e-15	2.66857e-15	3.26111e-16
282	2.89495e-14	4.99973e-15	6.91996e-15	1.57451e-15		3.55809e-13	6.26971e-14	8.96123e-14	1.94834e-14
283	1.73435e-13	3.54572e-14	4.72915e-14	1.08486e-14		2.06456e-12	4.19511e-13	5.78477e-13	1.3274e-13
284	1.85501e-12	4.23622e-13	5.48788e-13	1.35187e-13		2.11764e-11	4.7776e-12	6.38879e-12	1.62984e-12
285	5.52122e-12	1.26889e-12	1.62094e-12	3.88177e-13		6.33714e-11	1.39583e-11	1.83931e-11	4.65135e-12
286	4.81785e-11	2.38961e-11	3.15166e-11	4.62639e-12		5.08894e-10	2.73744e-10	3.7733e-10	5.32853e-11
287	3.04833e-10	1.04049e-10	1.2708e-10	3.53361e-11		3.07603e-09	1.0472e-09	1.31606e-09	3.92825e-10
288	1.63771e-09	6.37305e-10	7.57131e-10	2.43216e-10		1.54519e-08	6.01002e-09	7.33427e-09	2.57962e-09
289	9.61329e-09	4.0439e-09	4.72746e-09	1.6724e-09		8.67716e-08	3.65279e-08	4.38449e-08	1.71592e-08
290	4.74411e-08	2.23412e-08	2.56176e-08	9.17622e-09		4.06598e-07	1.91535e-07	2.24676e-07	9.05019e-08
291	1.2945e-07	6.52018e-08	7.40606e-08	2.88058e-08		1.07058e-06	5.38736e-07	6.26397e-07	2.70013e-07
292	4.44932e-07	2.43616e-07	2.73389e-07	1.19852e-07		3.4921e-06	1.90817e-06	2.19368e-06	1.04117e-06
293	9.07541e-07	5.2039e-07	5.81724e-07	2.79638e-07		6.91533e-06	3.95121e-06	4.5337e-06	2.26685e-06
294	1.70318e-06	1.04917e-06	1.16462e-06	5.99639e-07		1.23759e-05	7.56525e-06	8.63555e-06	4.49496e-06
295	3.79441e-06	2.47507e-06	2.68612e-06	1.43346e-06		2.63127e-05	1.68866e-05	1.89813e-05	1.068e-05
296	1.04287e-05	7.16497e-06	7.69806e-06	4.31194e-06		6.88233e-05	4.64704e-05	5.17071e-05	3.06742e-05
297	1.3119e-05	9.34236e-06	9.96371e-06	5.79667e-06		8.32996e-05	5.82638e-05	6.4347e-05	3.97129e-05
298	3.32636e-05	2.46566e-05	2.6093e-05	1.58219e-05		0.000201864	0.000146771	0.000160832	0.000103256
299	5.4733e-05	4.16032e-05	4.38022e-05	2.74602e-05		0.000320946	0.000239311	0.000260975	0.000172309
300	6.58441e-05	5.21892e-05	5.46101e-05	3.43123e-05		0.000369296	0.0002868	0.00031119	0.000205021
301	0.000115725	9.58785e-05	9.98086e-05	6.29363e-05		0.00062611	0.000506885	0.000547057	0.000364848
302	0.000113699	9.5093e-05	9.86498e-05	6.42094e-05		0.00059885	0.000489668	0.000526397	0.000361979
303	0.000302374	0.000258751	0.000267127	0.000179086		0.00152797	0.00127704	0.001367	0.00096585
304	0.00030491	0.000263738	0.000271676	0.000184611		0.00150932	0.0012746	0.00136183	0.000973741
305	0.000493281	0.000435152	0.000446176	0.00031206		0.00234002	0.00201291	0.00214203	0.00157101
306	0.000464064	0.000413451	0.000422957	0.000300045		0.00215351	0.00186943	0.00198565	0.00147345
307	0.000721746	0.000658824	0.000671577	0.000479162		0.00321807	0.00285078	0.00301577	0.00227402
308	0.000843172	0.000775249	0.000788933	0.000568205		0.00369296	0.00329411	0.00348062	0.00264705
309	0.000791895	0.00073173	0.00074386	0.000539206		0.0034218	0.00306599	0.00323672	0.00247632
310	0.000782981	0.000730908	0.000741228	0.000544726		0.0032898	0.00297703	0.00313629	0.00243041
311	0.00149109	0.00139766	0.00141618	0.00104686		0.0061908	0.00562122	0.0059182	0.00461118
312	0.00130682	0.00123289	0.00124705	0.000931078		0.00531562	0.00485508	0.00510328	0.0040129
313	0.00158216	0.0015004	0.00151601	0.00114091		0.00632423	0.00580342	0.00609467	0.00482782
314	0.00185872	0.001767	0.00178429	0.00134881		0.00736296	0.00677042	0.00710758	0.00565278
315	0.00196008	0.00187479	0.00189043	0.00144368		0.00759108	0.00701719	0.00735722	0.00590529
316	0.00139927	0.00134041	0.00135096	0.00103513		0.00538736	0.00498133	0.00522093	0.00420228
317	0.00236365	0.00227048	0.00228729	0.001762		0.00901145	0.0083357	0.00874889	0.00704732
318	0.00188137	0.00180878	0.00182221	0.00140655		0.00713627	0.00661117	0.00693541	0.00558965
319	0.00250713	0.00242626	0.00244072	0.00189988		0.00928261	0.00865133	0.00906166	0.00731561
320	0.00263824	0.00254334	0.00256057	0.00198404		0.00990671	0.00920083	0.00964559	0.0077862
321	0.00263035	0.00251034	0.00252288	0.00201677		0.00952651	0.00878763	0.00919509	0.00767286
322	0.00281096	0.00272241	0.00273795	0.00213501		0.0103687	0.00966998	0.0101262	0.00819079
323	0.00232805	0.00226088	0.00227222	0.00181747		0.00848491	0.00793254	0.00830126	0.00692681
324	0.00314374	0.00307614	0.00308184	0.00243203		0.011208	0.0105322	0.0109985	0.00909753
325	0.00297434	0.00283964	0.00285336	0.00228267		0.0107604	0.00993254	0.0103902	0.00868003
326	0.00432445	0.00423407	0.00424053	0.00335035		0.0153801	0.0144619	0.0150932	0.0125021
327	0.00426068	0.0041782	0.00418246	0.00331099		0.0150789	0.0141879	0.0148063	0.0122855
328	0.00384662	0.00375664	0.00376574	0.00296856		0.0137833	0.0129368	0.0135107	0.011175
329	0.0045114	0.00443459	0.00443534	0.00352248		0.0158249	0.014921	0.0155667	0.0129497
330	0.00516659	0.00508026	0.00507929	0.00403633		0.0181061	0.0170731	0.0178048	0.0148206
331	0.00435697	0.00427178	0.00427563	0.00338743		0.0154088	0.014505	0.0151362	0.012571
332	0.00459868	0.00452539	0.00452306	0.00360172		0.0160401	0.0151362	0.0157819	0.0131678
333	0.00452196	0.00445188	0.00444826	0.00354457		0.0157532	0.0148637	0.0154949	0.012934
334	0.0042912	0.00421745	0.00421801	0.00335352		0.0150358	0.0141736	0.0147919	0.0123256
335	0.00469958	0.00464489	0.00463965	0.00368351		0.0163127	0.0154375	0.0160975	0.0134045
336	0.00364006	0.00359584	0.00359129	0.00285528		0.0126284	0.011944	0.0124548	0.010383
337	0.00357239	0.00351657	0.00351435	0.00280242		0.0124304	0.0117274	0.0122324	0.0102238
338	0.00446851	0.0044176	0.00441151	0.00350601		0.0154806	0.0146628	0.0152797	0.0127446
339	0.0048737	0.0048126	0.00480625	0.00382651		0.0168866	0.0159684	0.016657	0.0139024
340	0.00576996	0.00570332	0.00569601	0.00452958		0.0199856	0.0189095	0.019713	0.0164562
341	0.00486512	0.00480405	0.00479707	0.00382208		0.0168436	0.0159253	0.0165997	0.0138766
342	0.00534865	0.00527993	0.00527123	0.00420372		0.0185078	0.0174892	0.0182352	0.015251
343	0.00552544	0.00545543	0.00544736	0.00434522		0.0191104	0.0180631	0.0188378	0.0157532
344	0.00398518	0.00393805	0.00393241	0.00313206		0.0137776	0.0130373	0.0135925	0.0113629
345	0.00515653	0.0050917	0.00508365	0.00405755		0.0178192	0.0168436	0.0175609	0.0147058
346	0.00448215	0.0044246	0.00441757	0.00352856		0.0154806	0.0146198	0.015251	0.0127761
347	0.00545787	0.0053881	0.00537973	0.00429763		0.0188378	0.0178048	0.0185652	0.0155523
348	0.00503966	0.00497568	0.00496755	0.00396986		0.0173888	0.0164275	0.0171305	0.0143615
349	0.00468289	0.00462226	0.00461508	0.00369039		0.0161405	0.015251	0.015911	0.0133429
350	0.00575281	0.00567848	0.00566883	0.0045349		0.0198134	0.018723	0.0195265	0.0163845
351	0.0054245	0.00535561	0.00534571	0.00427647		0.01868	0.0176613	0.0184074	0.0154519
352	0.00568026	0.00560686	0.00559914	0.00448032		0.0195552	0.0184791	0.0192682	0.0161836
353	0.00559438	0.00552332	0.00551278	0.00441444		0.0192395	0.0181922	0.0189669	0.0159397
354	0.00619935	0.00611948	0.00610886	0.0048925		0.0213342	0.0201578	0.0210042	0.0176613
355	0.00628881	0.00620795	0.00619779	0.00496388		0.0216212	0.0204447	0.0213055	0.0179052
356	0.00597211	0.00589604	0.00588551	0.00471699		0.0205164	0.0193974	0.0202151	0.0170014
357	0.00421809	0.00416397	0.00415662	0.00333134		0.0144906	0.0136972	0.0142754	0.01201
358	0.00410525	0.00405261	0.00404532	0.00324302		0.0140975	0.0133256	0.013888	0.0116872
359	0.00492587	0.00486211	0.00485401	0.0038922		0.0169009	0.0159827	0.016657	0.0140215
360	0.00667244	0.00658622	0.00657557	0.00527413		0.0228981	0.0216499	0.0225537	0.0189956
361	0.00486677	0.00480419	0.00479527	0.00384683		0.0167001	0.0157819	0.0164418	0.0138507
362	0.00485561	0.00479367	0.00478494	0.00384073		0.0166427	0.0157245	0.0163845	0.0138163
363	0.00604428	0.00596715	0.00595541	0.00478298		0.0207029	0.0195695	0.0203873	0.0171879
364	0.00682307	0.0067373	0.00672393	0.00540194		0.0233428	0.0220803	0.0229985	0.0194117
365	0.00594362	0.00586798	0.00585708	0.00470629		0.0203299	0.0192252	0.0200286	0.0169009
366	0.0079239	0.00782319	0.00780798	0.0062773		0.0270874	0.0256097	0.0266857	0.0225394
367	0.00726693	0.00717418	0.00716087	0.00575889		0.0248349	0.0234863	0.0244619	0.0206599
368	0.00660435	0.00651919	0.00650759	0.00523265		0.0225681	0.0213342	0.0222237	0.0187804
369	0.00722236	0.00712963	0.00711636	0.00572577		0.0246628	0.0233141	0.0242897	0.0205308
370	0.00823317	0.00812828	0.00811398	0.00653005		0.0280917	0.0265566	0.0276757	0.0234002
371	0.00685018	0.00676339	0.00674973	0.00543572		0.0233572	0.0220946	0.0230128	0.0194691
372	0.00569369	0.00562042	0.00561061	0.00451678		0.0194117	0.01835	0.0191248	0.0161692
373	0.00696577	0.00687727	0.00686382	0.0055288		0.0237302	0.0224389	0.0233859	0.0197847
374	0.00660471	0.00652037	0.00650682	0.00524418		0.0224963	0.0212625	0.022152	0.0187517
375	0.00533146	0.00526307	0.00525302	0.00423367		0.0181492	0.0171592	0.0178766	0.0151362
376	0.00660511	0.00652033	0.00650758	0.00524616		0.022482	0.0212625	0.0221377	0.0187517
377	0.00726844	0.00717681	0.00716338	0.00577581		0.0247201	0.0233859	0.0243615	0.0206456
378	0.00925268	0.0091346	0.0091179	0.00735429		0.0314633	0.029756	0.0309899	0.0262696
379	0.00723517	0.00714444	0.00713071	0.00575249		0.024591	0.0232567	0.0242323	0.0205451
380	0.00688078	0.0067934	0.0067802	0.00546943		0.0233859	0.0221233	0.0230415	0.0195265
381	0.00837801	0.00827183	0.00825594	0.00666252		0.0284648	0.0269153	0.0280343	0.0237732
382	0.00591277	0.00583734	0.00582663	0.00470425		0.0200717	0.0189813	0.0197704	0.0167718
383	0.00467934	0.0046203	0.00461147	0.00372452		0.015868	0.0150215	0.0156384	0.013274
384	0.00497904	0.00491536	0.00490579	0.00396382		0.0168866	0.0159684	0.0166284	0.0141219
385	0.00728013	0.00718702	0.00717303	0.00579661		0.0246771	0.0233428	0.0243041	0.0206456
386	0.00582692	0.00575185	0.00574107	0.00464124		0.0197417	0.0186656	0.0194404	0.0165136
387	0.00637817	0.00629798	0.00628545	0.00508272		0.0215925	0.0204303	0.0212768	0.0180774
388	0.00663173	0.00654752	0.00653508	0.00528585		0.0224389	0.0212338	0.022109	0.0187948
389	0.00709393	0.00700415	0.00699072	0.00565655		0.0240028	0.0226972	0.0236441	0.0201004
390	0.00864644	0.00853718	0.00851987	0.00689542		0.0292395	0.0276613	0.0287947	0.0245049
391	0.00939329	0.00927486	0.00925729	0.00749436		0.0317503	0.0300286	0.0312768	0.026614
392	0.00808388	0.0079818	0.00796519	0.00644964		0.027317	0.0258392	0.0269009	0.0228981
393	0.00404244	0.00399134	0.00398333	0.00322664		0.0136484	0.0129124	0.0134447	0.0114476
394	0.00599599	0.00591988	0.00590846	0.00478729		0.0202295	0.0191391	0.0199282	0.0169727
395	0.00932257	0.00920474	0.00918543	0.00744605		0.031449	0.029756	0.0309755	0.0263988
396	0.00822366	0.00811963	0.00810342	0.00656902		0.027733	0.0262409	0.0273313	0.0232854
397	0.00362202	0.00357627	0.00356906	0.00289435		0.0122066	0.0115495	0.0120258	0.010251
398	0.010327	0.0101967	0.0101768	0.00825242		0.0348062	0.0329267	0.0342897	0.0292252
399	0.0115977	0.0114518	0.0114282	0.00927215		0.039053	0.0369583	0.0384791	0.0328119
400	0.0120177	0.0118662	0.0118419	0.00960763		0.0404733	0.0382926	0.0398707	0.0340028
401	0.0123652	0.0122097	0.012185	0.00988142		0.0416641	0.039426	0.0410472	0.0350071
402	0.013094	0.0129279	0.0129031	0.0104677		0.0440888	0.0417072	0.0434288	0.0370444
403	0.0124798	0.0123218	0.0122972	0.0099809		0.0419941	0.0397273	0.0413628	0.0353083
404	0.0123058	0.0121506	0.0121262	0.00984281		0.0413915	0.0391677	0.0407746	0.0348062
405	0.0123241	0.0121692	0.0121439	0.00985925		0.0414489	0.0392251	0.040832	0.0348636
406	0.0121684	0.0120144	0.0119901	0.00973927		0.0408894	0.0386943	0.0402868	0.0344045
407	0.0120164	0.0118658	0.0118418	0.0096227		0.0403585	0.0381921	0.039756	0.0339741
408	0.012489	0.0123311	0.0123063	0.00999877		0.0419511	0.0396986	0.0413198	0.0353083
409	0.013394	0.013225	0.0131975	0.0107254		0.0449783	0.042568	0.044304	0.0378621
410	0.0117311	0.0115821	0.0115583	0.00939529		0.0393686	0.0372596	0.0387804	0.0331563
411	0.0127401	0.0125797	0.0125529	0.0102075		0.0427402	0.0404446	0.0421089	0.035997
412	0.0137305	0.0135573	0.0135283	0.011005		0.0460257	0.043558	0.045337	0.0387804
413	0.013388	0.013219	0.013192	0.0107299		0.0448922	0.0424819	0.0442179	0.0378191
414	0.013595	0.0134246	0.0133959	0.0109016		0.0455522	0.0431132	0.0448779	0.038393
415	0.0136713	0.0135006	0.0134722	0.010967		0.0457818	0.0433284	0.0451075	0.0386082
416	0.013966	0.0137901	0.0137611	0.0112081		0.0467287	0.0442323	0.04604	0.039426
417	0.013651	0.0134788	0.0134506	0.0109548		0.045667	0.043228	0.0449927	0.0385221
418	0.0134215	0.013254	0.0132259	0.0107739		0.0448922	0.0424963	0.0442323	0.0378765
419	0.0136272	0.0134552	0.0134279	0.0109404		0.0455666	0.0431275	0.0448922	0.0384504
420	0.0135932	0.0134218	0.0133946	0.0109136		0.0454374	0.0430128	0.0447631	0.0383499
421	0.0142571	0.014078	0.0140478	0.0114502		0.0476469	0.0450931	0.0469295	0.0402151
422	0.0135797	0.0134091	0.0133816	0.0109078		0.0453657	0.042941	0.0446914	0.0383069
423	0.0133004	0.0131337	0.0131048	0.0106867		0.0444188	0.0420372	0.0437588	0.0375178
424	0.0140942	0.0139167	0.0138879	0.0113255		0.0470587	0.0445479	0.0463557	0.039756
425	0.0141161	0.0139379	0.0139086	0.011345		0.0471017	0.044591	0.0463987	0.039799
426	0.0138027	0.0136286	0.0136013	0.0111008		0.0460257	0.043558	0.045337	0.0389095
427	0.0135625	0.0133924	0.0133625	0.0109081		0.0452079	0.0427976	0.0445336	0.0382208
428	0.0132253	0.0130585	0.0130308	0.0106359		0.0440888	0.0417359	0.0434288	0.0372739
429	0.0125754	0.0124187	0.012391	0.0101204		0.0418793	0.0396555	0.0412624	0.0354231
430	0.0110312	0.0108922	0.0108699	0.00887856		0.0367287	0.0347632	0.0361835	0.0310759
431	0.0109394	0.0108017	0.01078	0.00880365		0.0364274	0.0344906	0.0358966	0.0308177
432	0.0141803	0.0140018	0.0139718	0.0114167		0.0471878	0.0446627	0.0464848	0.0399281
433	0.014294	0.0141134	0.0140831	0.0115105		0.0475465	0.045007	0.0468291	0.0402438
434	0.0132881	0.0131207	0.0130917	0.0106996		0.0442036	0.0418507	0.0435436	0.0374174
435	0.0138884	0.0137127	0.0136838	0.0111821		0.0462122	0.0437445	0.0455092	0.0391103
436	0.0157016	0.0155049	0.0154706	0.0126483		0.0521949	0.0494116	0.0514202	0.0442036
437	0.0155487	0.0153542	0.0153196	0.0125325		0.0516498	0.0488951	0.050875	0.0437445
438	0.0142016	0.0140243	0.013993	0.0114517		0.0471448	0.044634	0.0464417	0.0399568
439	0.0146665	0.0144814	0.0144498	0.0118173		0.0487373	0.0461404	0.0480056	0.0412768
440	0.0151873	0.014995	0.0149625	0.0122412		0.0504446	0.0477473	0.0496842	0.0427258
441	0.0158144	0.0156147	0.0155813	0.0127552		0.0524675	0.0496698	0.0516785	0.0444762
442	0.0170017	0.0167858	0.0167503	0.0137141		0.0563843	0.0533858	0.0555522	0.0478191
443	0.0165501	0.0163405	0.0163056	0.0133439		0.0549353	0.0520084	0.0541175	0.0465565
444	0.0169544	0.0167403	0.0167048	0.0136769		0.0562408	0.0532566	0.0554087	0.0476899
445	0.0165841	0.0163743	0.016339	0.0133727		0.0550357	0.0521089	0.0542179	0.0466426
446	0.0158934	0.0156932	0.0156608	0.0128248		0.0526971	0.0498851	0.051908	0.0446914
447	0.0172444	0.0170267	0.0169892	0.0139209		0.057116	0.0540888	0.0562695	0.0484647
448	0.0174952	0.0172735	0.0172363	0.0141153		0.0580055	0.0549209	0.0571304	0.049182
449	0.0176532	0.0174301	0.0173922	0.0142547		0.0584503	0.055337	0.0575751	0.0495981
450	0.0182096	0.017977	0.0179398	0.0147083		0.060258	0.0570443	0.0593542	0.0511476
451	0.0189211	0.0186826	0.0186423	0.0152866		0.0625966	0.0592681	0.0616641	0.0531562
452	0.0182665	0.0180359	0.0179971	0.0147586		0.0604159	0.0572165	0.059512	0.0513054
453	0.0172168	0.0169989	0.0169626	0.0139124		0.0569295	0.0539023	0.056083	0.0483499
454	0.0180261	0.0177975	0.0177604	0.0145722		0.0595694	0.0563987	0.0586799	0.0506024
455	0.0181624	0.0179311	0.017893	0.0146807		0.0600285	0.0568291	0.0591246	0.0509898
456	0.0186448	0.0184085	0.0183684	0.0150749		0.0615923	0.0583212	0.0606741	0.0523384
457	0.0190086	0.0187675	0.0187259	0.015371		0.0627831	0.0594546	0.0618362	0.0533571
458	0.018377	0.018142	0.0181031	0.0148559		0.0607315	0.0575034	0.0598133	0.0515924
459	0.018342	0.0181066	0.0180685	0.0148324		0.060588	0.0573599	0.0596698	0.0514919
460	0.0184272	0.0181893	0.0181518	0.0149001		0.060875	0.0576325	0.0599568	0.0517358
461	0.0188949	0.0186502	0.0186118	0.0152794		0.0624101	0.0590816	0.0614632	0.0530414
462	0.019097	0.0188512	0.0188114	0.0154502		0.0630414	0.0596842	0.0620801	0.053601
463	0.0189571	0.0187129	0.0186734	0.0153318		0.062611	0.0592681	0.0616641	0.0532136
464	0.0186927	0.0184532	0.0184135	0.0151236		0.0616784	0.0584073	0.0607459	0.0524532
465	0.0185169	0.0182802	0.0182414	0.0149885		0.0610471	0.0578047	0.0601289	0.0519367
466	0.0187542	0.0185139	0.0184749	0.0151864		0.0617932	0.0585077	0.0608606	0.0525823
467	0.0184158	0.0181794	0.0181416	0.0149076		0.0607028	0.057489	0.0597989	0.0516498
468	0.0186856	0.0184451	0.0184068	0.0151281		0.061578	0.0583068	0.0606598	0.0523958
469	0.0188438	0.0186002	0.0185607	0.015259		0.0620945	0.0587946	0.0611476	0.0528406
470	0.0182729	0.0180372	0.0180003	0.014796		0.060215	0.0570156	0.0593111	0.051248
471	0.0182993	0.0180629	0.0180255	0.01482		0.0602867	0.0570873	0.0593685	0.0513054
472	0.0193175	0.019068	0.0190291	0.0156427		0.063644	0.060258	0.0626827	0.0541605
473	0.0191087	0.0188614	0.0188222	0.0154738		0.0629553	0.0596124	0.0619941	0.0535723
474	0.0191487	0.0189008	0.0188642	0.0155017		0.0631275	0.0597702	0.0621662	0.0537014
475	0.0193798	0.0191282	0.019089	0.0156869		0.0639022	0.060502	0.0629266	0.0543614
476	0.0188878	0.0186422	0.0186044	0.0152882		0.062281	0.0589668	0.0613341	0.052984
477	0.0190058	0.0187575	0.0187204	0.0153824		0.0626827	0.0593398	0.0617215	0.053314
478	0.0195768	0.0193171	0.0192805	0.0158461		0.0645478	0.0611045	0.0635579	0.0549209
479	0.0194835	0.0192246	0.0191877	0.0157739		0.0642179	0.0608032	0.0632423	0.0546483
480	0.0195461	0.0192868	0.0192477	0.0158272		0.0644187	0.0609898	0.0634288	0.0548205
481	0.0199607	0.0196931	0.0196558	0.0161698		0.0657387	0.062238	0.0647344	0.0559826
482	0.020113	0.0198437	0.0198061	0.0162991		0.0661978	0.0626684	0.0651791	0.0563843
483	0.0199227	0.0196564	0.0196171	0.0161518		0.0655235	0.0620371	0.0645192	0.0558391
484	0.0195471	0.0192865	0.019249	0.0158503		0.0642609	0.0608463	0.0632853	0.0547774
485	0.0186358	0.0183886	0.0183523	0.0151111		0.0612624	0.0580055	0.0603298	0.0522093
486	0.0163176	0.016101	0.0160695	0.0132348		0.0536153	0.0507746	0.0527975	0.04571
487	0.0171404	0.0169118	0.0168791	0.0139051		0.0562982	0.0532997	0.0554374	0.0479912
488	0.0188174	0.0185686	0.0185314	0.0152631		0.0618219	0.0585364	0.060875	0.0526971
489	0.018891	0.0186393	0.0186038	0.0153186		0.0620945	0.0587946	0.0611476	0.0529267
490	0.0199482	0.0196831	0.0196443	0.0161834		0.0655235	0.0620371	0.0645192	0.0558678
491	0.0196743	0.0194119	0.0193748	0.0159669		0.0645765	0.0611476	0.0635866	0.0550787
492	0.0186172	0.0183694	0.0183335	0.0151098		0.0611045	0.0578621	0.060172	0.0521232
493	0.0192625	0.0190046	0.018968	0.0156346		0.0632136	0.0598563	0.0622523	0.053931
494	0.019478	0.0192155	0.0191803	0.0158079		0.0639309	0.0605306	0.062941	0.0545335
495	0.0196798	0.0194142	0.0193777	0.0159713		0.0645765	0.0611476	0.0635866	0.0550931
496	0.0198404	0.0195729	0.0195368	0.016103		0.0651074	0.0616497	0.0641174	0.0555378
497	0.0202105	0.0199381	0.0199006	0.0164069		0.0663125	0.0627831	0.0652939	0.0565708
498	0.0193331	0.0190711	0.0190357	0.0156967		0.0634144	0.0600428	0.0624388	0.0541175
499	0.0196415	0.0193736	0.0193382	0.0159481		0.0644187	0.0609898	0.0634288	0.0549783
500	0.0191213	0.0188584	0.0188249	0.0155261		0.0627258	0.0593829	0.0617645	0.0535436
501	0.0188075	0.0185472	0.0185159	0.0152671		0.0617215	0.058436	0.0607745	0.0526684
502	0.0185496	0.0182921	0.0182601	0.0150493		0.0609467	0.0577043	0.0599998	0.0519797
503	0.0193078	0.0190346	0.0190048	0.0156526		0.0635292	0.0601289	0.0625392	0.0541462
504	0.0186227	0.0183552	0.0183296	0.0150509		0.061578	0.0582638	0.0606167	0.0523384
505	0.0195649	0.0192858	0.0192562	0.0158566		0.0644044	0.0609467	0.0634001	0.0548779
506	0.0202108	0.0199228	0.0198919	0.0163768		0.0665421	0.062984	0.0655091	0.0567
507	0.0192488	0.0189741	0.0189451	0.0155968		0.0633857	0.0599855	0.0623958	0.0540027
508	0.01871	0.0184441	0.0184152	0.0151689		0.0615493	0.0582494	0.060588	0.0524675
509	0.0192833	0.0190097	0.0189796	0.0156389		0.0633857	0.0599998	0.0623958	0.0540457
510	0.0192267	0.0189543	0.0189255	0.0156001		0.0631562	0.0597846	0.0621806	0.0538736
511	0.0198241	0.0195442	0.0195114	0.0160931		0.0650643	0.061578	0.0640457	0.0555235
512	0.0201004	0.0198164	0.0197832	0.0163219		0.0659252	0.0624101	0.0649065	0.0562839
513	0.0190837	0.0188143	0.0187829	0.0155005		0.0625679	0.0592394	0.0615923	0.0534288
514	0.0190037	0.0187351	0.0187042	0.0154395		0.062281	0.0589668	0.0613197	0.0531992
515	0.018859	0.0185918	0.0185612	0.015324		0.0618075	0.0585077	0.0608463	0.0527975
516	0.0188602	0.0185915	0.0185606	0.0153252		0.0618075	0.0585077	0.0608319	0.0527975
517	0.0167935	0.0165549	0.0165287	0.0136483		0.0550213	0.0520802	0.0541605	0.0470013
518	0.017686	0.0174345	0.0174059	0.0143726		0.0579482	0.0548635	0.0570443	0.049512
519	0.0185782	0.0183112	0.0182835	0.0150961		0.0608893	0.0576325	0.0599281	0.0520084
520	0.0192931	0.0190181	0.0189868	0.0156767		0.0632279	0.0598563	0.062238	0.054017
521	0.0195248	0.0192449	0.0192146	0.0158668		0.0639883	0.0605737	0.062984	0.0546627
522	0.0195924	0.019309	0.0192796	0.0159188		0.0642179	0.0607745	0.0631992	0.0548492
523	0.0192862	0.0190059	0.0189765	0.0156707		0.0632136	0.0598276	0.0622093	0.0540027
524	0.020011	0.0197193	0.0196898	0.0162556		0.0656239	0.0621088	0.0645765	0.05604
525	0.0202746	0.0199764	0.0199483	0.0164635		0.0665278	0.0629697	0.0654804	0.0568147
526	0.0194326	0.0191459	0.0191182	0.0157809		0.0637588	0.0603441	0.0627545	0.0544475
527	0.0183564	0.0180821	0.0180573	0.0149032		0.060258	0.0570156	0.0592968	0.0514489
528	0.0194751	0.0191837	0.0191574	0.015811		0.0639453	0.060502	0.0629123	0.0545909
529	0.0205728	0.0202625	0.0202364	0.0167002		0.0675608	0.0639309	0.0664847	0.0576756
530	0.0203285	0.0200215	0.0199952	0.0165016		0.0667717	0.0631705	0.0656956	0.0570012
531	0.0206828	0.0203681	0.0203431	0.0167893		0.0679338	0.0642753	0.0668434	0.0579912
532	0.0200192	0.0197149	0.0196903	0.0162511		0.065753	0.0622093	0.0646913	0.0561404
533	0.0194763	0.0191786	0.019155	0.0158112		0.0639596	0.0605163	0.0629266	0.0546196
534	0.0200996	0.0197917	0.0197673	0.0163194		0.0659826	0.0624245	0.0649209	0.0563556
535	0.0205762	0.0202619	0.0202368	0.0167099		0.0675321	0.0638879	0.0664417	0.0576756
536	0.020797	0.0204801	0.0204544	0.0168915		0.0682494	0.0645765	0.0671447	0.0582925
537	0.0200141	0.0197075	0.0196836	0.0162571		0.0656526	0.0621232	0.0646052	0.0560974
538	0.0203917	0.0200811	0.0200561	0.0165647		0.0669008	0.0632996	0.0658247	0.0571591
539	0.0202563	0.0199463	0.0199213	0.0164531		0.066456	0.0628692	0.06538	0.0567717
540	0.0194391	0.0191401	0.0191175	0.0157868		0.0638018	0.0603585	0.0627688	0.0544905
541	0.0195395	0.0192359	0.0192143	0.0158522		0.0642179	0.0607602	0.0631849	0.0548061
542	0.0201802	0.0198659	0.0198441	0.0163689		0.0663556	0.0627688	0.0652796	0.0566282
543	0.0200936	0.0197808	0.0197573	0.0163136		0.0659682	0.0624101	0.0648922	0.0563413
544	0.0204281	0.0201083	0.0200872	0.0165747		0.0671447	0.0635149	0.0660543	0.0573169
545	0.0204251	0.0201053	0.0200846	0.0165771		0.067116	0.0634862	0.0660256	0.0573025
546	0.0204858	0.0201635	0.0201424	0.0166121		0.0674029	0.0637588	0.0662982	0.0575034
547	0.0205755	0.0202514	0.0202308	0.0166966		0.0676181	0.0639596	0.0665134	0.0577186
548	0.0203896	0.0200671	0.0200472	0.0165506		0.0669725	0.0633427	0.0658821	0.0571878
549	0.0205128	0.0201887	0.0201678	0.0166555		0.0673455	0.0637014	0.0662408	0.0575177
550	0.0208183	0.0204913	0.0204676	0.0169081		0.0683212	0.0646339	0.0672164	0.0583786
551	0.020627	0.0203013	0.0202799	0.0167559		0.0676755	0.064017	0.0665708	0.057819
552	0.0208195	0.0204916	0.0204685	0.0169142		0.0682925	0.0646052	0.0671734	0.0583642
553	0.0204844	0.0201603	0.0201374	0.0166407		0.0672021	0.0635722	0.0660973	0.0574317
554	0.0210237	0.0206907	0.0206688	0.0170789		0.0689668	0.0652365	0.0678333	0.0589381
555	0.0211125	0.0207761	0.0207556	0.0171509		0.0692681	0.0655091	0.0681346	0.0591964
556	0.0208823	0.0205487	0.0205267	0.0169626		0.068522	0.0648061	0.0673886	0.0585507
557	0.0202772	0.0199516	0.0199317	0.01647		0.0665421	0.0629266	0.0654374	0.0568578
558	0.0201678	0.0198426	0.0198235	0.0163787		0.0662121	0.062611	0.0651074	0.0565708
559	0.0198422	0.0195212	0.0195024	0.0161125		0.0651504	0.061621	0.0640744	0.055667
560	0.0201424	0.0198151	0.0197961	0.0163563		0.0661547	0.0625536	0.06505	0.0565134
561	0.0204591	0.0201245	0.0201057	0.0166117		0.0672021	0.0635435	0.066083	0.057403
562	0.020363	0.0200276	0.0200089	0.0165309		0.0669008	0.0632566	0.0657817	0.0571447
563	0.0209679	0.0206209	0.020604	0.0170187		0.0689237	0.0651648	0.067776	0.0588664
564	0.0204385	0.0200998	0.0200836	0.0165851		0.0672164	0.0635435	0.066083	0.0573886
565	0.020314	0.0199754	0.0199603	0.0164826		0.0668147	0.0631705	0.0656956	0.0570443
566	0.0200722	0.0197377	0.0197223	0.0162861		0.0660256	0.0624245	0.0649209	0.0563843
567	0.0204903	0.0201465	0.0201315	0.0166184		0.067446	0.0637588	0.0663125	0.0575608
568	0.0202677	0.0199263	0.0199134	0.0164172		0.0668577	0.0631992	0.0657387	0.0570012
569	0.0196148	0.0192767	0.0192707	0.0158393		0.0650213	0.0614489	0.0639309	0.0552939
570	0.0197746	0.0194347	0.0194265	0.0159864		0.0654374	0.0618362	0.0643326	0.0556957
571	0.0198486	0.0195094	0.0195	0.0160718		0.0655091	0.0619223	0.0644044	0.0558535
572	0.0202689	0.0199191	0.0199111	0.016383		0.0670873	0.0634001	0.0659539	0.0571017
573	0.0205672	0.020211	0.020203	0.0166271		0.0680629	0.0643183	0.0669008	0.0579338
574	0.0205745	0.0202193	0.020212	0.0166339		0.0680772	0.064347	0.0669295	0.0579625
575	0.0202323	0.0198809	0.0198745	0.01635		0.0669869	0.0632996	0.0658391	0.0570012
576	0.0201134	0.019766	0.0197574	0.0162572		0.0665565	0.0629123	0.0654374	0.0566569
577	0.0203778	0.0200253	0.0200187	0.0164745		0.0674173	0.0637014	0.0662695	0.0573886
578	0.0201482	0.0198007	0.0197928	0.0163016		0.0665708	0.0629123	0.0654374	0.0567143
579	0.020265	0.0199182	0.0199082	0.0164087		0.0668721	0.0631992	0.0657387	0.0570012
580	0.0206503	0.0202985	0.020287	0.0167352		0.0680342	0.0643183	0.0668864	0.0580486
581	0.0207774	0.0204253	0.0204127	0.0168507		0.0683785	0.0646339	0.0672164	0.0583642
582	0.0211819	0.0208244	0.0208106	0.0171891		0.0696411	0.0658247	0.0684646	0.059469
583	0.0212555	0.0208981	0.0208835	0.0172576		0.0698133	0.0660113	0.0686368	0.0596555
584	0.0214431	0.021084	0.0210685	0.0174132		0.0704158	0.0665708	0.069225	0.060172
585	0.0209324	0.0205809	0.0205668	0.0169983		0.0687229	0.0649783	0.0675608	0.0587229
586	0.0204754	0.0201318	0.0201188	0.0166203		0.0672738	0.0636009	0.0661404	0.0574604
587	0.0208282	0.0204759	0.0204662	0.0168837		0.0685794	0.0648348	0.0674316	0.058522
588	0.0199114	0.0195665	0.0195657	0.0160551		0.0661117	0.0624819	0.065007	0.0561548
589	0.0171167	0.0168132	0.01682	0.0137017		0.0575177	0.0543327	0.0565565	0.0485077
590	0.0179319	0.0176134	0.0176212	0.014355		0.0602437	0.0569008	0.0592394	0.0508176
591	0.0192919	0.0189518	0.0189558	0.015495		0.0644761	0.0609037	0.0633857	0.0545622
592	0.0189734	0.0186362	0.0186414	0.0152225		0.0635149	0.0599998	0.0624388	0.0536871
593	0.0196021	0.0192606	0.0192601	0.0157875		0.0652222	0.0616354	0.0641318	0.0553226
594	0.0194585	0.0191141	0.0191166	0.0156607		0.0648204	0.0612337	0.0637157	0.0549353
595	0.0188032	0.01847	0.0184734	0.0150849		0.0629697	0.0594833	0.061908	0.0532279
596	0.0200672	0.0197146	0.0197127	0.0161942		0.0665565	0.0628979	0.0654374	0.0565852
597	0.0198567	0.0195068	0.0195042	0.0160141		0.0659395	0.0623097	0.0648204	0.0560113
598	0.0199641	0.0196103	0.0196086	0.016123		0.0661547	0.0624962	0.0650213	0.0562695
599	0.0201311	0.0197751	0.0197727	0.0162772		0.0665708	0.0629123	0.0654374	0.0566856
600	0.0203765	0.0200186	0.0200125	0.0165118		0.067159	0.0634718	0.0660113	0.0573025
601	0.0203841	0.0200281	0.0200196	0.0165448		0.0670156	0.0633283	0.0658678	0.0572451
602	0.020313	0.0199581	0.0199485	0.0164934		0.0667286	0.0630701	0.0655808	0.0570299
603	0.0207173	0.020356	0.0203451	0.0168308		0.0680055	0.0642753	0.0668434	0.0581347
604	0.0211034	0.0207362	0.0207253	0.0171475		0.0692537	0.0654517	0.0680629	0.0592107
605	0.0210471	0.020683	0.0206709	0.0171074		0.0690242	0.0652365	0.0678477	0.0590385
606	0.0210091	0.0206456	0.0206342	0.017083		0.068852	0.0650787	0.0676755	0.0589094
607	0.0212616	0.0208968	0.0208821	0.0172956		0.0696267	0.0658104	0.0684359	0.0595837
608	0.0210636	0.0207031	0.0206888	0.0171402		0.0689237	0.0651648	0.0677473	0.0590098
609	0.0211296	0.0207693	0.0207565	0.0171992		0.0691102	0.0653369	0.0679338	0.059182
610	0.0209849	0.0206289	0.0206145	0.0170827		0.0686224	0.0648778	0.0674603	0.0587516
611	0.0211263	0.0207705	0.020757	0.0172004		0.0690529	0.0652939	0.0678907	0.059139
612	0.0210762	0.020721	0.0207072	0.0171601		0.0688807	0.0651361	0.0677186	0.0589955
613	0.0208321	0.0204814	0.0204684	0.0169597		0.0680772	0.0643613	0.0669295	0.0582925
614	0.0205711	0.0202265	0.0202126	0.0167523		0.0671877	0.0635435	0.0660686	0.0575608
615	0.0210501	0.0207002	0.0206851	0.0171462		0.0687229	0.0649926	0.0675751	0.0588807
616	0.0203811	0.0200424	0.0200271	0.0166028		0.0665134	0.0628979	0.0653943	0.0569869
617	0.0203606	0.0200242	0.020008	0.0165883		0.0664417	0.0628262	0.0653226	0.0569295
618	0.0211674	0.0208163	0.0208013	0.0172458		0.0690529	0.0653082	0.0679051	0.0591677
619	0.02098	0.0206338	0.0206185	0.0170936		0.0684359	0.06472	0.0672882	0.0586368
620	0.0211243	0.0207761	0.0207615	0.017207		0.0689237	0.0651935	0.067776	0.0590529
621	0.021149	0.0207993	0.0207859	0.0172184		0.0690529	0.0653082	0.0679051	0.059139
622	0.0207847	0.0204397	0.0204288	0.0168979		0.0680199	0.0643326	0.0668864	0.0581777
623	0.0203545	0.020015	0.020008	0.0165248		0.0667573	0.0631275	0.0656526	0.0570443
624	0.0201008	0.019768	0.0197586	0.0163317		0.0658391	0.0622667	0.0647487	0.0562982
625	0.0202095	0.019875	0.0198647	0.0164342		0.0660973	0.0625106	0.065007	0.0565565
626	0.0205402	0.0202008	0.0201903	0.0167018		0.0671877	0.0635435	0.0660686	0.0574747
627	0.0207151	0.0203704	0.0203636	0.0168199		0.0679051	0.0642322	0.066786	0.0580342
628	0.0195519	0.0192131	0.0192219	0.0157372		0.0649783	0.0614345	0.0639166	0.0551361
629	0.0203473	0.0200048	0.0200047	0.0164717		0.0670012	0.0633714	0.0659108	0.057116
630	0.0200484	0.0197111	0.0197098	0.0162403		0.0659395	0.0623671	0.0648635	0.0562552
631	0.0205216	0.0201832	0.0201753	0.0166762		0.067159	0.0635292	0.0660543	0.0574317
632	0.0201444	0.0198119	0.0198065	0.016361		0.0659826	0.0624101	0.0649065	0.0563987
633	0.0208651	0.020525	0.0205148	0.0169765		0.0681346	0.0644618	0.0670299	0.0583212
634	0.020732	0.0203973	0.0203853	0.0168912		0.0675464	0.0639166	0.066456	0.0578908
635	0.0210517	0.0207144	0.0206999	0.0171548		0.0685651	0.0648778	0.067446	0.0587659
636	0.0207928	0.0204599	0.0204461	0.0169527		0.0676612	0.064017	0.0665565	0.0580199
637	0.02113	0.0207935	0.0207776	0.0172296		0.0687372	0.0650357	0.0676181	0.0589381
638	0.021399	0.0210607	0.0210431	0.0174654		0.0694976	0.0657674	0.0683785	0.0596411
639	0.0211851	0.0208511	0.0208353	0.0172964		0.0687659	0.0650787	0.0676612	0.0590242
640	0.0210217	0.0206912	0.0206734	0.0171694		0.0681777	0.0645192	0.0670729	0.0585364
641	0.0210275	0.0206994	0.0206816	0.0171797		0.0681777	0.0645192	0.0670729	0.0585507
642	0.0209691	0.0206438	0.0206233	0.0171388		0.0679338	0.0643039	0.0668434	0.0583642
643	0.0212271	0.0208968	0.0208776	0.0173407		0.068809	0.0651217	0.0676899	0.0590816
644	0.0211987	0.02087	0.0208505	0.0173253		0.0686655	0.0649926	0.0675608	0.0589812
645	0.0211755	0.0208466	0.0208297	0.0172924		0.0686798	0.065007	0.0675894	0.0589668
646	0.0204284	0.0201041	0.0200954	0.0166271		0.0665995	0.0630414	0.0655378	0.0570299
647	0.0198389	0.0195212	0.0195163	0.0160718		0.0651791	0.0616641	0.0641318	0.0555665
648	0.0197438	0.0194217	0.0194233	0.0159727		0.0649926	0.0614919	0.0639596	0.055337
649	0.0194385	0.0191276	0.0191244	0.0157352		0.0639309	0.0604876	0.0629123	0.0544761
650	0.0200356	0.019722	0.0197104	0.0163183		0.0652365	0.0617502	0.0642035	0.0558678
651	0.0210014	0.0206741	0.0206595	0.0171179		0.0682781	0.0646339	0.0671877	0.058522
652	0.0194633	0.0191462	0.0191495	0.0157366		0.0641174	0.0606598	0.0630988	0.0545622
653	0.0207501	0.0204295	0.0204152	0.0169157		0.0674603	0.0638592	0.0663843	0.057819
654	0.0205711	0.0202529	0.0202395	0.0167715		0.0668434	0.0632853	0.0657817	0.0573025
655	0.0195777	0.0192693	0.0192618	0.0159199		0.0638879	0.0604733	0.0628836	0.054634
656	0.017461	0.0171872	0.017179	0.0142118		0.0568865	0.0538449	0.0559826	0.0486942
657	0.0179161	0.0176365	0.0176295	0.0145833		0.0583642	0.0552509	0.057446	0.0499711
658	0.0202689	0.0199594	0.0199443	0.0165375		0.0657817	0.062281	0.0647487	0.0564274
659	0.0204628	0.0201496	0.0201346	0.0166988		0.0663699	0.0628405	0.0653226	0.0569439
660	0.0205039	0.0201888	0.0201763	0.0167252		0.0665421	0.0629984	0.0654948	0.0570873
661	0.0206274	0.020311	0.0202974	0.0168194		0.0669869	0.0634144	0.0659252	0.057446
662	0.020646	0.0203281	0.0203175	0.0168171		0.067159	0.0635866	0.0661117	0.0575464
663	0.0203363	0.0200247	0.0200117	0.0165772		0.0660686	0.0625536	0.0650213	0.0566426
664	0.0207677	0.0204547	0.0204381	0.0169661		0.0672308	0.0636583	0.0661691	0.057733
665	0.0209009	0.0205904	0.020569	0.0170978		0.0675034	0.0639309	0.0664417	0.0580342
666	0.021042	0.0207324	0.0207095	0.017233		0.0678477	0.0642466	0.066786	0.0583786
667	0.0211068	0.0207989	0.0207737	0.0172977		0.0679625	0.0643757	0.0669008	0.0585077
668	0.0211847	0.0208779	0.020851	0.0173746		0.0681346	0.0645335	0.0670729	0.0586942
669	0.0215449	0.0212322	0.0212034	0.0176726		0.0692681	0.0656095	0.0681777	0.0596698
670	0.0214936	0.0211838	0.0211551	0.0176345		0.0690672	0.065423	0.0679912	0.059512
671	0.0215186	0.0212089	0.0211795	0.0176577		0.0691389	0.0654804	0.0680486	0.0595694
672	0.0213639	0.021059	0.0210302	0.0175334		0.0686224	0.065007	0.0675464	0.059139
673	0.0217157	0.0214041	0.0213742	0.0178245		0.0697272	0.0660543	0.0686368	0.0601002
674	0.0216655	0.0213553	0.0213247	0.0177842		0.069555	0.0658821	0.0684646	0.0599424
675	0.0214959	0.0211902	0.0211592	0.0176467		0.0689955	0.0653513	0.0679194	0.059469
676	0.0216692	0.0213614	0.0213301	0.0177917		0.0695407	0.0658678	0.0684503	0.0599424
677	0.0214784	0.0211732	0.0211418	0.017635		0.0689094	0.0652796	0.0678333	0.0594116
678	0.0215592	0.0212529	0.0212226	0.0177021		0.0691676	0.0655235	0.0680916	0.0596268
679	0.0212375	0.0209376	0.0209056	0.0174396		0.0681203	0.0645335	0.0670586	0.0587373
680	0.021436	0.021134	0.0211035	0.0176049		0.0687516	0.0651361	0.0676899	0.0592824
681	0.0213226	0.0210233	0.020992	0.0175106		0.0683785	0.0647918	0.0673312	0.0589668
682	0.0213258	0.0210246	0.0209946	0.0175128		0.0683929	0.0647918	0.0673312	0.0589668
683	0.0213115	0.0210095	0.0209803	0.0174996		0.0683498	0.0647487	0.0672882	0.0589238
684	0.0212198	0.0209205	0.0208915	0.0174228		0.0680629	0.0644905	0.0670156	0.0586799
685	0.0214495	0.0211471	0.0211159	0.0176166		0.0687659	0.0651504	0.0677042	0.0592968
686	0.0213379	0.0210368	0.0210085	0.01752		0.0684359	0.0648491	0.0673886	0.0590098
687	0.0156076	0.0153219	0.0153684	0.0121859		0.0541749	0.0511763	0.0533427	0.0448205
688	0.0176199	0.017318	0.0173498	0.0140288		0.0593255	0.0561117	0.0584216	0.0499281
689	0.0176716	0.0173694	0.0174007	0.0140759		0.0594546	0.0562408	0.0585364	0.0500429
690	0.0183124	0.0180071	0.0180318	0.0146785		0.0610041	0.0577186	0.0600572	0.0516211
691	0.0189485	0.0186417	0.0186576	0.0152837		0.0624819	0.0591533	0.0615206	0.0531419
692	0.019101	0.0187978	0.0188084	0.015449		0.0627258	0.0593829	0.0617645	0.0534575
693	0.0180463	0.0177556	0.0177703	0.0145078		0.0598707	0.0566569	0.0589525	0.0507028
694	0.0174972	0.0172129	0.0172293	0.0140624		0.0580629	0.0549496	0.0571734	0.0491103
695	0.0186358	0.0183464	0.0183512	0.0150887		0.0611045	0.0578477	0.060172	0.0520228
696	0.0186832	0.0183948	0.0183979	0.015134		0.0612193	0.0579625	0.0602867	0.0521376
697	0.0205918	0.0202925	0.0202765	0.0168229		0.0665421	0.0630414	0.0655235	0.0571447
698	0.0202545	0.0199595	0.0199454	0.0165411		0.0655091	0.0620514	0.0645048	0.0562265
699	0.0192397	0.0189443	0.0189467	0.0156048		0.0628979	0.059555	0.0619367	0.053644
700	0.0189889	0.0186976	0.0186992	0.0153956		0.0621232	0.0588233	0.0611763	0.0529553
701	0.0185429	0.0182519	0.0182609	0.0149724		0.0610758	0.057819	0.0601433	0.0518937
702	0.0189231	0.0186294	0.0186356	0.0153235		0.0620227	0.0587229	0.0610758	0.0528406
703	0.0190695	0.0187778	0.018778	0.0154738		0.0623097	0.0589955	0.0613484	0.0531419
704	0.0200563	0.0197593	0.0197513	0.0163491		0.0650643	0.0616354	0.0640744	0.05571
705	0.0198919	0.0195906	0.0195901	0.0161612		0.0648491	0.0614058	0.0638592	0.0554231
706	0.020108	0.0198083	0.019804	0.0163724		0.0653082	0.0618649	0.0643183	0.0559252
707	0.0201509	0.0198502	0.0198438	0.0164137		0.0654087	0.061951	0.0644044	0.0560256
708	0.020223	0.019921	0.0199171	0.0164663		0.0656669	0.0622093	0.064677	0.0562408
709	0.0205739	0.0202768	0.0202632	0.0168203		0.0663843	0.0628979	0.06538	0.0570443
710	0.0204207	0.0201167	0.0201113	0.0166539		0.0661404	0.062654	0.0651361	0.0567286
711	0.020533	0.0202327	0.0202233	0.0167715		0.0663412	0.0628549	0.0653369	0.0569726
712	0.020626	0.0203289	0.0203129	0.0168781		0.0664417	0.0629553	0.0654374	0.0571304
713	0.020325	0.0200256	0.0200168	0.0166007		0.0656669	0.0622093	0.0646626	0.0563843
714	0.0204563	0.0201589	0.0201454	0.0167192		0.06604	0.0625536	0.0650213	0.0567143
715	0.0194986	0.0192064	0.0192036	0.0158676		0.0633857	0.0600285	0.0624245	0.0542609
716	0.0193928	0.0190999	0.0191012	0.01576		0.0631705	0.059842	0.0622093	0.054017
717	0.0149248	0.0146608	0.0147019	0.0117692		0.0509898	0.0482064	0.0502294	0.0423958
718	0.0133383	0.0130934	0.0131374	0.0104247		0.0461835	0.0436297	0.0454805	0.0380487
719	0.0122588	0.0120346	0.0120752	0.00959173		0.0423815	0.0400286	0.0417359	0.034921
720	0.0126417	0.0124069	0.0124536	0.00982906		0.0441175	0.0416641	0.0434575	0.0361835
721	0.0151715	0.0149123	0.0149437	0.0120577		0.0511906	0.0484073	0.0504159	0.042855
722	0.0185977	0.0183065	0.0183176	0.0150485		0.0609898	0.0577616	0.0600715	0.051951
723	0.0166781	0.0164038	0.0164276	0.0133589		0.0555809	0.0525967	0.0547487	0.0468722
724	0.0143107	0.0140619	0.0140984	0.0113197		0.0486512	0.0459826	0.0479195	0.0405307
725	0.0136904	0.0134442	0.0134862	0.0107434		0.0471017	0.0445049	0.0463987	0.0389669
726	0.0145725	0.0143159	0.014354	0.0115124		0.0496268	0.0469152	0.0488808	0.0413055
727	0.0152299	0.014968	0.0150016	0.012092		0.0514632	0.0486655	0.0506885	0.0430415
728	0.0137825	0.0135393	0.0135768	0.0108664		0.047073	0.0445049	0.04637	0.0391103
729	0.0150211	0.0147719	0.0147956	0.0119829		0.0503872	0.0476612	0.0496268	0.0423098
730	0.0156939	0.0154237	0.0154599	0.0124628		0.0530271	0.0501433	0.0522236	0.0443614
731	0.0149188	0.014663	0.014697	0.0118301		0.0505163	0.0477617	0.0497559	0.0422093
732	0.016768	0.0164948	0.0165172	0.0134631		0.0556813	0.0526828	0.0548348	0.04703
733	0.0184455	0.0181616	0.0181686	0.0149342		0.0604446	0.0572308	0.0595263	0.0514776
734	0.0191585	0.018872	0.0188722	0.0155664		0.0624245	0.0591246	0.0614919	0.053314
735	0.0186464	0.0183663	0.0183674	0.0151218		0.0609467	0.0577186	0.0600285	0.0519654
736	0.0185861	0.0182964	0.0183079	0.0150482		0.0608893	0.0576612	0.0599568	0.051865
737	0.0187014	0.0184178	0.0184202	0.0151523		0.061205	0.0579625	0.0602867	0.0521663
738	0.0194271	0.0191396	0.0191369	0.0158298		0.062984	0.0596698	0.0620371	0.053974
739	0.019085	0.0188063	0.0187997	0.0155609		0.0618219	0.0585651	0.0608893	0.052984
740	0.0198511	0.0195686	0.0195546	0.016235		0.0639883	0.0606311	0.0630127	0.0549783
741	0.0198161	0.0195366	0.0195193	0.0162319		0.0637014	0.0603728	0.0627401	0.0548061
742	0.0200242	0.0197478	0.0197237	0.0164365		0.0641605	0.0608032	0.0631849	0.0552939
743	0.0206174	0.0203352	0.0203091	0.0169351		0.0659826	0.0625392	0.0649926	0.0569008
744	0.0206939	0.0204138	0.0203832	0.0170208		0.066083	0.0626397	0.065093	0.0570443
745	0.020818	0.0205412	0.0205049	0.0171435		0.0663556	0.0628979	0.0653513	0.0573312
746	0.0209406	0.0206606	0.0206251	0.0172431		0.0667573	0.063271	0.0657387	0.0576756
747	0.0210411	0.020763	0.0207262	0.0173329		0.0670443	0.0635435	0.0660256	0.0579338
748	0.0210388	0.020762	0.0207227	0.0173332		0.0670156	0.0635292	0.0659969	0.0579195
749	0.0208322	0.0205598	0.0205209	0.0171656		0.0663412	0.0628979	0.0653513	0.0573456
750	0.0208491	0.0205753	0.0205367	0.0171799		0.0663986	0.062941	0.0653943	0.0573886
751	0.0206642	0.0203936	0.0203547	0.0170265		0.0658104	0.0623814	0.0648061	0.0568721
752	0.020784	0.0205119	0.0204727	0.0171279		0.0661691	0.0627401	0.0651791	0.0572021
753	0.0209224	0.0206496	0.02061	0.0172421		0.0665995	0.0631418	0.0655952	0.0575751
754	0.0209917	0.0207178	0.0206786	0.0172988		0.066829	0.063357	0.0658247	0.0577616
755	0.0208962	0.020623	0.0205832	0.0172192		0.0665278	0.0630701	0.0655235	0.0575034
756	0.0209282	0.020655	0.0206158	0.017248		0.0666138	0.0631418	0.0656095	0.0575895
757	0.0209866	0.0207138	0.0206736	0.0172969		0.0668004	0.0633283	0.0657961	0.0577473
758	0.0207564	0.0204862	0.020447	0.017105		0.0660686	0.0626397	0.0650787	0.057116
759	0.0204354	0.0201595	0.0201319	0.0168007		0.0652939	0.0618936	0.0643039	0.0563413
760	0.00553294	0.00537632	0.00545342	0.0037281		0.0231563	0.0216786	0.0228263	0.0167001
761	0.00357167	0.00345213	0.00352076	0.00224674		0.0159827	0.0148923	0.0157532	0.0107977
762	0.0122168	0.0119777	0.0120378	0.00929767		0.0439884	0.0415063	0.0433284	0.0355953
763	0.00745675	0.00727059	0.00734803	0.00525747		0.0296843	0.0278622	0.0292395	0.0223529
764	0.00997109	0.00975506	0.00982546	0.00734736		0.0375609	0.0353657	0.0370013	0.0294977
765	0.0122749	0.012033	0.0120948	0.0093382		0.0442179	0.0417215	0.043558	0.0357675
766	0.0141834	0.0139253	0.0139754	0.0110913		0.0490242	0.0463413	0.0482925	0.0406598
767	0.0171147	0.0168268	0.0168612	0.0137016		0.0570156	0.053974	0.0561548	0.0482208
768	0.0191965	0.0189099	0.0189122	0.0156455		0.0621806	0.0589238	0.061248	0.0533284
769	0.0195046	0.0192246	0.0192139	0.0159607		0.0627688	0.0594833	0.0618219	0.0539883
770	0.0200615	0.0197885	0.0197622	0.0164915		0.0641031	0.0607602	0.0631275	0.0553083
771	0.0201907	0.0199262	0.0198896	0.0166343		0.0643039	0.0609611	0.0633427	0.0555809
772	0.0202431	0.0199801	0.0199414	0.0166872		0.0644044	0.0610615	0.0634431	0.0556813
773	0.0204077	0.0201429	0.0201031	0.0168252		0.0649209	0.0615349	0.0639309	0.0561261
774	0.0203313	0.0200697	0.0200284	0.0167657		0.0646626	0.0613054	0.063687	0.0559109
775	0.0202014	0.0199412	0.0199003	0.0166602		0.0642322	0.0609037	0.063271	0.0555522
776	0.0204747	0.02021	0.0201683	0.0168862		0.065093	0.0617071	0.0641174	0.0562982
777	0.0202312	0.0199702	0.0199295	0.0166874		0.0643183	0.0609754	0.0633427	0.0556383
778	0.0201319	0.0198722	0.0198308	0.0166046		0.0640027	0.0606885	0.0630414	0.0553657
779	0.0201745	0.0199146	0.0198728	0.0166391		0.0641461	0.0608176	0.0631705	0.0554804
780	0.0200898	0.0198308	0.0197887	0.0165703		0.0638735	0.060545	0.0628979	0.0552365
781	0.0201349	0.019877	0.0198338	0.0166089		0.0640027	0.0606885	0.0630414	0.0553657
782	0.0202835	0.0200234	0.0199812	0.0167317		0.0644761	0.0611332	0.0635005	0.0557674
783	0.0199543	0.0196977	0.0196568	0.0164617		0.0634288	0.0601289	0.0624675	0.0548635
784	0.0200758	0.0198189	0.0197759	0.0165619		0.0638018	0.0604876	0.0628405	0.0551935
785	0.0198907	0.0196335	0.0195956	0.0163976		0.0632853	0.0599998	0.0623384	0.05472
786	0.0200841	0.0198206	0.0197842	0.0165463		0.0639596	0.0606454	0.0629984	0.0552796
787	0.019439	0.0191778	0.0191517	0.0159429		0.0623671	0.0591103	0.0614345	0.0537014
788	0.0190672	0.0188126	0.0187853	0.0156072		0.0613771	0.0581634	0.0604589	0.0527545
789	0.0189367	0.0186662	0.0186552	0.0154708		0.0611189	0.0579195	0.0602007	0.0524675
790	0.0181855	0.0179207	0.0179157	0.0148099		0.0590242	0.0559252	0.058149	0.0504876
791	0.0186658	0.0184009	0.0183887	0.0152556		0.060215	0.0570586	0.0593111	0.0516928
792	0.0186361	0.0183747	0.0183594	0.0152499		0.0599998	0.0568578	0.0590959	0.0515637
793	0.0183095	0.0180514	0.0180368	0.0149726		0.0590242	0.0559252	0.0581347	0.0506885
794	0.0191499	0.018898	0.018866	0.0157685		0.0610328	0.0578477	0.0601146	0.0527114
795	0.0193458	0.0190867	0.0190585	0.0158966		0.0618649	0.0586368	0.0609324	0.0533571
796	0.0181945	0.0179331	0.0179248	0.01483		0.0589381	0.0558391	0.0580629	0.0504876
797	0.0181718	0.0179246	0.0179029	0.0147981		0.0589812	0.0558822	0.058106	0.0504733
798	0.0192718	0.0190069	0.0189866	0.0158089		0.0617932	0.0585651	0.0608606	0.0532279
799	0.0190648	0.0187998	0.0187829	0.015617		0.0612767	0.0580629	0.0603585	0.0527114
800	0.0185816	0.0183152	0.0183065	0.0151828		0.0599568	0.0568147	0.0590529	0.0514776

## Sheet: 10degS
10 degrees S latitude	Daily Irradiance (mE cm-2 d-1 nm-1)					Solar Noon Irradiance (mE cm-2 d-1 nm-1)
wavelength (nm)	March 20th	June 21st	September 22nd	December 22nd		March 20th	June 21st	September 22nd	December 22nd
280	3.09731e-17	1.90464e-19	5.92467e-18	2.26988e-17		4.29697e-16	2.52653e-18	8.43326e-17	3.0459e-16
281	8.60781e-16	7.57515e-18	1.90444e-16	6.50285e-16		1.14562e-14	9.90384e-17	2.5997e-15	8.37443e-15
282	2.88936e-14	5.16019e-16	6.7547e-15	2.29763e-14		3.55092e-13	6.42179e-15	8.75463e-14	2.73026e-13
283	1.73152e-13	3.79425e-15	4.62772e-14	1.40248e-13		2.06169e-12	4.67287e-14	5.66426e-13	1.61549e-12
284	1.8522e-12	5.20767e-14	5.38188e-13	1.53514e-12		2.11477e-11	6.30271e-13	6.27114e-12	1.6987e-11
285	5.5117e-12	1.61255e-13	1.59074e-12	4.55252e-12		6.3271e-11	1.93256e-12	1.80631e-11	5.0502e-11
286	4.81138e-11	2.07109e-12	3.08579e-11	4.14032e-11		5.08176e-10	2.41463e-11	3.69439e-10	4.24819e-10
287	3.04437e-10	1.69029e-11	1.25147e-10	2.67088e-10		3.07173e-09	1.901e-10	1.29741e-09	2.61979e-09
288	1.6359e-09	1.26069e-10	7.47151e-10	1.47203e-09		1.54375e-08	1.35078e-09	7.24675e-09	1.35294e-08
289	9.60458e-09	9.07693e-10	4.67065e-09	8.77002e-09		8.66999e-08	9.39882e-09	4.33571e-08	7.71733e-08
290	4.73974e-08	5.3729e-09	2.53404e-08	4.39859e-08		4.06311e-07	5.36871e-08	2.22524e-07	3.68722e-07
291	1.29334e-07	1.76115e-08	7.33192e-08	1.21047e-07		1.06972e-06	1.67431e-07	6.20945e-07	9.78332e-07
292	4.44555e-07	7.72023e-08	2.7097e-07	4.20367e-07		3.48923e-06	6.81203e-07	2.17646e-06	3.22237e-06
293	9.06907e-07	1.854e-07	5.76695e-07	8.60032e-07		6.91102e-06	1.53084e-06	4.49783e-06	6.38879e-06
294	1.70208e-06	4.2228e-07	1.1552e-06	1.62376e-06		1.23687e-05	3.20802e-06	8.57099e-06	1.1482e-05
295	3.79195e-06	1.03839e-06	2.6667e-06	3.69986e-06		2.62983e-05	7.83068e-06	1.88522e-05	2.47632e-05
296	1.04227e-05	3.22716e-06	7.64723e-06	1.02648e-05		6.87946e-05	2.3228e-05	5.14059e-05	6.53943e-05
297	1.3113e-05	4.43581e-06	9.90505e-06	1.29989e-05		8.32709e-05	3.07603e-05	6.4017e-05	7.96841e-05
298	3.32526e-05	1.24057e-05	2.59546e-05	3.31978e-05		0.000201721	8.1994e-05	0.000160114	0.000194404
299	5.47055e-05	2.18502e-05	4.35819e-05	5.488e-05		0.000320802	0.000138981	0.000259827	0.000310472
300	6.58157e-05	2.85364e-05	5.43533e-05	6.63988e-05		0.000369296	0.000172022	0.000309899	0.000359109
301	0.000115693	5.31504e-05	9.9382e-05	0.000117263		0.000625966	0.000310472	0.000545048	0.000611906
302	0.00011366	5.44245e-05	9.82452e-05	0.000115576		0.000598707	0.000309899	0.000524675	0.000587086
303	0.00030229	0.000153876	0.000266147	0.000308734		0.00152797	0.000838017	0.00136284	0.00150358
304	0.000304837	0.000159659	0.000270701	0.000312052		0.00150932	0.000850356	0.00135781	0.00148923
305	0.000493124	0.000273007	0.000444736	0.000506919		0.00234002	0.00138751	0.00213629	0.00231563
306	0.000463972	0.000263968	0.000421646	0.000478015		0.00215351	0.00130875	0.00198134	0.00213486
307	0.000721568	0.00042914	0.000669702	0.000745647		0.00321663	0.00204877	0.00301003	0.00320085
308	0.000842968	0.000511012	0.000786706	0.00087251		0.00369152	0.00239454	0.00347201	0.00367861
309	0.000791626	0.000486452	0.000741906	0.000820235		0.00342036	0.00224676	0.00323098	0.00341175
310	0.00078277	0.000494357	0.000739337	0.000812817		0.0032898	0.00221664	0.00312911	0.00328693
311	0.00149091	0.000952242	0.00141274	0.00154938		0.0061908	0.00421519	0.00590672	0.00618793
312	0.00130659	0.000850249	0.00124426	0.00135971		0.00531419	0.00368291	0.00509467	0.00531992
313	0.00158178	0.00104507	0.0015126	0.00164814		0.00632423	0.00444188	0.00608463	0.0063357
314	0.00185822	0.00123722	0.00178025	0.00193736		0.00736153	0.00520802	0.0070961	0.00738018
315	0.0019598	0.00132905	0.00188633	0.0020458		0.00759108	0.00545766	0.00734574	0.0076169
316	0.00139908	0.000953996	0.00134814	0.00146074		0.00538736	0.00388808	0.00521232	0.00540027
317	0.00236325	0.0016271	0.00228263	0.0024683		0.00901001	0.00653082	0.00873455	0.00903297
318	0.00188099	0.00129999	0.00181834	0.00196496		0.00713484	0.00518363	0.00692394	0.00715636
319	0.00250673	0.00176273	0.0024359	0.00262222		0.00928117	0.00680629	0.00904732	0.00932135
320	0.0026379	0.00183654	0.00255533	0.00275735		0.00990528	0.00723097	0.00962981	0.00994114
321	0.00263	0.00187701	0.00251801	0.00275789		0.00952508	0.00715062	0.00918218	0.0095882
322	0.00281055	0.00198172	0.00273263	0.00294067		0.0103673	0.00762264	0.0101104	0.0104146
323	0.00232764	0.00165463	0.00226793	0.00243687		0.00848347	0.00626827	0.00828979	0.00852795
324	0.00314337	0.00226912	0.00307637	0.00330117		0.0112066	0.00849638	0.0109842	0.0112869
325	0.00297386	0.0021242	0.00284786	0.00311877		0.0107589	0.00808893	0.0103759	0.0108307
326	0.00432407	0.00312657	0.00423345	0.00454222		0.0153801	0.01168	0.0150789	0.0154949
327	0.00426024	0.00309207	0.004175	0.00447761		0.0150789	0.0114835	0.0147919	0.0151936
328	0.00384607	0.00276655	0.00375857	0.00403711		0.0137819	0.0104275	0.0134921	0.0138794
329	0.00451089	0.00329337	0.00442733	0.00474562		0.0158249	0.0121147	0.0155523	0.015954
330	0.0051662	0.00377428	0.0050707	0.00543595		0.0181061	0.0138694	0.0177905	0.0182496
331	0.00435653	0.00316305	0.00426792	0.00457896		0.0154088	0.0117489	0.0151076	0.0155236
332	0.00459751	0.00336908	0.00451556	0.00483983		0.0160401	0.0123228	0.0157675	0.0161692
333	0.00452079	0.00331638	0.00444099	0.00475966		0.0157388	0.0121076	0.0154806	0.0158823
334	0.0042907	0.00313495	0.00421001	0.00451439		0.0150358	0.0115294	0.0147632	0.0151506
335	0.00469907	0.00345517	0.00463154	0.00494939		0.0163127	0.0125738	0.0160832	0.0164418
336	0.00363943	0.00267686	0.00358482	0.00383383		0.0126269	0.00973598	0.0124404	0.0127331
337	0.00357183	0.00262181	0.0035081	0.00376023		0.0124289	0.00956955	0.0122166	0.0125322
338	0.0044674	0.0032886	0.00440436	0.0047067		0.0154806	0.011954	0.0152654	0.0156097
339	0.00487318	0.00358631	0.00479786	0.0051334		0.0168866	0.0130315	0.0166284	0.0170301
340	0.00576962	0.00424807	0.00568611	0.00607798		0.0199856	0.0154375	0.0196986	0.0201578
341	0.00486455	0.00358225	0.00478939	0.00512449		0.0168436	0.0130057	0.0165853	0.016987
342	0.00534699	0.00393871	0.00526224	0.00563327		0.0185078	0.0142898	0.0182209	0.0186656
343	0.00552503	0.0040713	0.00543758	0.00582019		0.0191104	0.0147632	0.0188091	0.0192682
344	0.00398437	0.00293693	0.00392559	0.00419773		0.0137761	0.0106556	0.0135753	0.0138967
345	0.00515613	0.003802	0.00507425	0.00543289		0.0178192	0.0137776	0.0175322	0.017977
346	0.00448169	0.00330609	0.00441026	0.00472233		0.0154806	0.0119713	0.0152367	0.0156097
347	0.00545674	0.00402665	0.00537006	0.00575003		0.0188378	0.0145767	0.0185365	0.0189956
348	0.00503872	0.00371944	0.00495779	0.0053091		0.0173888	0.0134576	0.0171018	0.0175322
349	0.00468231	0.00345746	0.00460691	0.00493426		0.0161405	0.0125021	0.0158823	0.016284
350	0.0057518	0.00424939	0.00565941	0.00606139		0.0198134	0.0153515	0.0194978	0.0199856
351	0.00542289	0.00400692	0.00533721	0.00571561		0.01868	0.0144763	0.0183931	0.0188522
352	0.00567931	0.00419732	0.00558811	0.00598426		0.0195552	0.0151649	0.0192395	0.0197273
353	0.00559337	0.00413611	0.00550414	0.0058948		0.0192395	0.0149354	0.0189382	0.0194117
354	0.00619827	0.00458308	0.00609848	0.00653206		0.0213199	0.0165423	0.0209899	0.0215207
355	0.00628833	0.00465093	0.00618674	0.00662632		0.0216212	0.0167862	0.0212768	0.021822
356	0.00597158	0.00441809	0.00587479	0.00629393		0.0205164	0.0159253	0.0201864	0.0207029
357	0.00421746	0.00312082	0.00414936	0.00444466		0.0144906	0.0112525	0.0142596	0.0146198
358	0.00410461	0.0030382	0.00403832	0.00432574		0.0140961	0.0109497	0.0138723	0.0142223
359	0.00492469	0.00364633	0.00484554	0.00518969		0.0169009	0.0131363	0.0166427	0.0170588
360	0.00667208	0.00494032	0.00656441	0.00703152		0.0228981	0.0177905	0.0225394	0.0230989
361	0.00486493	0.00360389	0.00478764	0.00512772		0.0166857	0.012977	0.0164275	0.0168436
362	0.00485508	0.00359809	0.00477594	0.00511691		0.0166427	0.012944	0.0163701	0.0167862
363	0.00604315	0.00448139	0.0059458	0.00636985		0.0206886	0.0161119	0.0203586	0.0208895
364	0.0068227	0.00506144	0.00671143	0.00718971		0.0233428	0.0181778	0.0229698	0.023558
365	0.00594309	0.004409	0.00584682	0.00626361		0.0203299	0.0158393	0.0200143	0.0205164
366	0.0079234	0.00587952	0.00779416	0.00835052		0.0270874	0.0211047	0.026657	0.0273457
367	0.00726596	0.00539423	0.00714866	0.00765876		0.0248349	0.0193543	0.0244332	0.0250645
368	0.00660285	0.00490314	0.00649636	0.00696036		0.0225537	0.0175896	0.022195	0.0227689
369	0.0072208	0.00536338	0.00710356	0.00761017		0.0246484	0.0192252	0.024261	0.0248923
370	0.0082316	0.00611769	0.00809886	0.00867673		0.0280917	0.0219225	0.027647	0.02835
371	0.00684916	0.00509175	0.00673846	0.0072192		0.0233572	0.0182352	0.0229841	0.0235724
372	0.00569263	0.00423145	0.00560001	0.00600014		0.0194117	0.0151506	0.0190961	0.0195982
373	0.0069654	0.0051798	0.00685302	0.0073417		0.0237302	0.0185365	0.0233572	0.0239597
374	0.00660321	0.00491223	0.00649665	0.00695968		0.022482	0.0175753	0.0221233	0.0226972
375	0.00533104	0.00396681	0.005244	0.00561795		0.0181492	0.0141836	0.0178622	0.0183213
376	0.00660356	0.00491468	0.00649682	0.00696059		0.022482	0.0175753	0.0221233	0.0226972
377	0.00726693	0.00541067	0.00714991	0.00765975		0.0247201	0.01934	0.0243328	0.024964
378	0.00925223	0.00688837	0.00910212	0.0097524		0.0314633	0.0246054	0.0309612	0.0317646
379	0.0072348	0.00538843	0.0071179	0.00762592		0.024591	0.0192395	0.0242036	0.0248349
380	0.00687928	0.00512427	0.0067688	0.00725124		0.0233859	0.0182926	0.0230128	0.0236154
381	0.00837703	0.00624191	0.00824127	0.00882896		0.0284648	0.0222811	0.0280056	0.0287374
382	0.00591229	0.00440625	0.00581647	0.00623112		0.0200717	0.0157101	0.019756	0.0202582
383	0.00467876	0.00348935	0.00460343	0.00493171		0.015868	0.0124361	0.0156241	0.0160258
384	0.00497851	0.0037134	0.00489789	0.00524689		0.0168866	0.0132309	0.016614	0.0170444
385	0.00727976	0.00543165	0.00716147	0.00767198		0.0246771	0.01934	0.0242754	0.0249067
386	0.0058259	0.00434892	0.00573224	0.0061409		0.0197273	0.0154806	0.019426	0.0199282
387	0.00637768	0.004762	0.00627435	0.00672263		0.0215925	0.016944	0.0212481	0.0218077
388	0.00663083	0.0049521	0.00652329	0.0069885		0.0224389	0.017604	0.0220803	0.0226542
389	0.0070929	0.0052984	0.00697864	0.00747636		0.0239884	0.0188378	0.0236154	0.0242323
390	0.00864593	0.00645981	0.00850619	0.00911322		0.0292395	0.0229554	0.028766	0.0295264
391	0.00939224	0.00702024	0.00924018	0.00989872		0.0317359	0.0249354	0.0312338	0.0320515
392	0.00808351	0.00604207	0.00795193	0.00851838		0.027317	0.021449	0.0268722	0.0275752
393	0.0040418	0.00302283	0.00397667	0.00426039		0.013647	0.0107245	0.0134304	0.0137819
394	0.00599551	0.00448558	0.00589829	0.00631915		0.0202295	0.015911	0.0199139	0.0204303
395	0.00932086	0.00697445	0.00917071	0.00982591		0.031449	0.0247201	0.0309468	0.0317646
396	0.00822263	0.00615343	0.00809056	0.00866743		0.027733	0.0218077	0.0273026	0.0280056
397	0.00362151	0.00271151	0.00356304	0.00381757		0.0122051	0.00960399	0.0120114	0.0123285
398	0.0103255	0.0077309	0.0101579	0.0108845		0.0348062	0.0273744	0.0342467	0.0351505
399	0.0115962	0.00868666	0.0114088	0.012224		0.039053	0.030746	0.038436	0.0394403
400	0.0120156	0.00900057	0.0118224	0.012666		0.0404733	0.0318507	0.0398277	0.040875
401	0.0123642	0.00925672	0.0121647	0.0130331		0.0416641	0.0327832	0.0410042	0.0420802
402	0.0130917	0.00980634	0.0128814	0.0138009		0.0440888	0.0347058	0.0433858	0.0445192
403	0.0124771	0.0093501	0.0122762	0.0131533		0.0419798	0.0330702	0.0413198	0.0424102
404	0.0123036	0.00922157	0.0121047	0.0129692		0.0413915	0.0326111	0.0407316	0.0418076
405	0.0123232	0.00923598	0.0121248	0.0129891		0.0414489	0.0326541	0.040789	0.041865
406	0.0121669	0.00912306	0.0119704	0.0128248		0.0408894	0.0322381	0.0402438	0.0413055
407	0.0120149	0.00901384	0.011821	0.0126654		0.0403585	0.031822	0.0397129	0.0407603
408	0.0124881	0.00936564	0.0122853	0.0131622		0.0419511	0.0330702	0.0412768	0.0423671
409	0.013393	0.0100478	0.0131768	0.014118		0.0449783	0.0354662	0.044261	0.0454374
410	0.0117283	0.00880216	0.0115388	0.0123638		0.0393686	0.0310616	0.0387373	0.0397703
411	0.0127391	0.0095625	0.0125319	0.0134273		0.0427402	0.0337302	0.0420515	0.0431706
412	0.0137283	0.0103103	0.0135069	0.0144707		0.0460257	0.036327	0.045294	0.0464991
413	0.0133858	0.0100525	0.0131701	0.0141104		0.0448922	0.0354375	0.0441749	0.0453514
414	0.013594	0.0102114	0.0133745	0.0143296		0.0455522	0.0359683	0.0448349	0.0460257
415	0.0136704	0.010273	0.0134502	0.014411		0.0457818	0.0361692	0.0450644	0.0462552
416	0.0139644	0.0104979	0.0137385	0.0147218		0.0467287	0.0369296	0.0459826	0.0472165
417	0.0136489	0.0102628	0.0134285	0.0143882		0.045667	0.0360974	0.0449353	0.0461404
418	0.0134205	0.0100924	0.013204	0.0141473		0.0448922	0.0354949	0.0441749	0.0453514
419	0.0136256	0.0102488	0.0134054	0.0143627		0.0455666	0.0360257	0.0448349	0.04604
420	0.0135916	0.0102247	0.0133726	0.0143279		0.0454374	0.0359253	0.0447201	0.0459109
421	0.0142549	0.0107262	0.0140256	0.0150269		0.0476326	0.0376756	0.0468865	0.0481347
422	0.0135781	0.0102181	0.0133584	0.0143136		0.0453657	0.0358822	0.0446483	0.0458392
423	0.0132976	0.0100108	0.0130842	0.014019		0.0444188	0.0351362	0.0437014	0.0448779
424	0.014092	0.0106092	0.0138651	0.0148561		0.0470587	0.0372452	0.0463126	0.0475465
425	0.0141145	0.0106282	0.0138852	0.0148782		0.0471017	0.0372883	0.0463557	0.0475895
426	0.0138011	0.0103984	0.0135781	0.0145497		0.0460113	0.0364418	0.0452796	0.0464991
427	0.0135615	0.0102182	0.0133423	0.0142955		0.0452079	0.0358105	0.0444905	0.0456813
428	0.0132237	0.00996374	0.0130095	0.0139403		0.0440888	0.034921	0.0433858	0.0445479
429	0.0125738	0.00947911	0.0123712	0.0132556		0.0418793	0.033185	0.0412194	0.0423241
430	0.0110296	0.00831758	0.0108517	0.011629		0.0367287	0.0291104	0.0361405	0.0371161
431	0.0109391	0.00824645	0.0107619	0.0115319		0.0364274	0.0288665	0.0358535	0.0368148
432	0.014178	0.0106943	0.0139491	0.0149473		0.0471878	0.037403	0.0464274	0.0476756
433	0.0142917	0.0107828	0.0140597	0.0150668		0.0475465	0.0377043	0.0467861	0.0480486
434	0.0132858	0.0100237	0.0130716	0.0140057		0.0442036	0.0350501	0.0435006	0.0446627
435	0.0138862	0.0104735	0.0136611	0.0146376		0.0461978	0.0366283	0.0454661	0.0466856
436	0.0157	0.0118491	0.0154444	0.0165514		0.0521949	0.0414059	0.0513628	0.0527545
437	0.0155459	0.0117394	0.0152951	0.0163888		0.0516354	0.0409898	0.0508176	0.0521949
438	0.0142011	0.0107262	0.0139708	0.0149713		0.0471448	0.0374317	0.0463987	0.0476469
439	0.0146654	0.0110703	0.0144268	0.0154596		0.0487373	0.0386656	0.0479625	0.0492538
440	0.0151851	0.0114674	0.0149381	0.016009		0.0504302	0.0400286	0.0496268	0.0509754
441	0.0158128	0.0119471	0.0155561	0.0166696		0.0524675	0.0416641	0.0516354	0.0530271
442	0.0169988	0.0128469	0.0167223	0.0179198		0.0563843	0.0447918	0.0554948	0.0569869
443	0.0165485	0.0124998	0.016279	0.0174437		0.0549353	0.0436154	0.0540601	0.0555091
444	0.0169527	0.0128103	0.0166787	0.0178722		0.0562408	0.044677	0.0553513	0.0568434
445	0.0165818	0.0125266	0.016313	0.0174797		0.0550357	0.0437014	0.0541605	0.0556239
446	0.0158918	0.0120128	0.0156337	0.0167529		0.0526828	0.041865	0.0518506	0.0532566
447	0.0172421	0.0130403	0.0169623	0.0181778		0.057116	0.0453944	0.0562122	0.057733
448	0.0174923	0.0132224	0.0172093	0.0184406		0.0579912	0.0460831	0.057073	0.0586225
449	0.0176509	0.0133522	0.017364	0.018608		0.0584503	0.0464704	0.0575177	0.0590816
450	0.0182062	0.0137779	0.0179102	0.0191936		0.0602437	0.0479195	0.0592824	0.0609037
451	0.0189193	0.0143195	0.0186124	0.0199455		0.0625966	0.049799	0.0616067	0.063271
452	0.0182641	0.0138244	0.0179669	0.0192549		0.0604159	0.048063	0.0594546	0.0610758
453	0.0172157	0.0130322	0.0169351	0.0181487		0.0569295	0.045294	0.0560256	0.0575464
454	0.0180237	0.0136491	0.0177302	0.0190011		0.0595694	0.047403	0.0586081	0.060215
455	0.0181589	0.0137519	0.017864	0.0191447		0.0600141	0.0477617	0.0590672	0.0606741
456	0.0186425	0.0141193	0.0183392	0.0196529		0.0615923	0.0490242	0.0606024	0.0622667
457	0.0190057	0.014398	0.0186966	0.0200365		0.0627831	0.0499855	0.0617788	0.0634575
458	0.0183735	0.0139146	0.0180752	0.0193697		0.0607172	0.0483356	0.0597559	0.0613771
459	0.018339	0.0138917	0.0180395	0.0193319		0.0605737	0.0482351	0.0596124	0.0612337
460	0.0184249	0.0139549	0.0181233	0.019422		0.060875	0.0484647	0.0598994	0.0615349
461	0.0188919	0.0143095	0.0185802	0.0199132		0.0623958	0.0496842	0.0613915	0.0630844
462	0.0190947	0.014469	0.0187814	0.0201292		0.0630271	0.0502007	0.0620227	0.0637157
463	0.0189547	0.0143588	0.0186435	0.0199812		0.0625966	0.049842	0.0615923	0.0632853
464	0.018691	0.0141653	0.0183843	0.0197023		0.0616784	0.0491247	0.0606885	0.0623527
465	0.0185152	0.0140393	0.0182122	0.0195171		0.0610471	0.0486512	0.0600715	0.0617071
466	0.0187513	0.0142246	0.0184457	0.0197679		0.0617788	0.0492538	0.0608032	0.0624675
467	0.0184135	0.0139627	0.0181119	0.0194103		0.0607028	0.0483786	0.0597272	0.0613628
468	0.0186832	0.0141688	0.018377	0.0196948		0.061578	0.0490816	0.060588	0.0622523
469	0.0188409	0.0142899	0.0185314	0.0198602		0.0620801	0.0494977	0.0610902	0.0627688
470	0.01827	0.0138573	0.0179701	0.0192592		0.060215	0.0479912	0.0592394	0.060875
471	0.018297	0.0138805	0.017997	0.0192884		0.0602724	0.048063	0.0593111	0.0609467
472	0.0193139	0.0146505	0.0189973	0.02036		0.0636296	0.0507315	0.062611	0.0643326
473	0.0191063	0.0144927	0.0187911	0.0201395		0.062941	0.0501863	0.0619367	0.0636296
474	0.0191476	0.0145176	0.0188323	0.0201826		0.0631275	0.0503011	0.0621088	0.0638161
475	0.0193775	0.014691	0.0190589	0.0204257		0.0638879	0.0509181	0.0628692	0.0645909
476	0.0188849	0.0143178	0.0185751	0.0199065		0.062281	0.0496268	0.0612767	0.0629553
477	0.0190041	0.0144057	0.0186905	0.0200302		0.0626684	0.0499424	0.0616641	0.063357
478	0.0195733	0.0148396	0.0192504	0.0206309		0.0645335	0.0514345	0.0635005	0.0652509
479	0.0194805	0.0147717	0.0191571	0.0205323		0.0642179	0.0511906	0.0631849	0.0649209
480	0.0195431	0.0148194	0.0192177	0.0205981		0.0644044	0.0513485	0.0633714	0.0651217
481	0.0199577	0.0151395	0.0196238	0.0210347		0.0657387	0.0524245	0.0646626	0.066456
482	0.02011	0.0152629	0.0197734	0.0211956		0.0661978	0.0528119	0.0651217	0.0669295
483	0.0199191	0.015123	0.0195863	0.0209951		0.0655091	0.0522954	0.0644474	0.0662408
484	0.0195453	0.0148414	0.0192183	0.0205999		0.0642609	0.0513054	0.0632136	0.0649783
485	0.0186329	0.01415	0.0183237	0.0196402		0.0612624	0.0489095	0.0602724	0.0619367
486	0.0163146	0.0123931	0.0160429	0.017196		0.0536153	0.0428119	0.0527545	0.0542036
487	0.0171375	0.0130211	0.0168522	0.0180628		0.0562839	0.0449496	0.05538	0.0569152
488	0.018815	0.0142932	0.0185033	0.0198312		0.0618219	0.0493686	0.0608176	0.0624962
489	0.0188886	0.0143439	0.0185738	0.0199067		0.0620801	0.0495694	0.0610758	0.0627688
490	0.0199458	0.0151537	0.0196129	0.0210225		0.0655091	0.0523241	0.0644474	0.0662408
491	0.0196725	0.0149514	0.0193434	0.0207339		0.0645765	0.0515924	0.0635292	0.0652939
492	0.0186161	0.0141484	0.0183043	0.01962		0.0611045	0.0488234	0.0601146	0.0617788
493	0.0192595	0.0146395	0.0189386	0.0202993		0.0632136	0.050502	0.0621806	0.0639166
494	0.0194738	0.0148005	0.0191496	0.0205253		0.0639166	0.0510759	0.0628836	0.0646339
495	0.0196774	0.014955	0.0193469	0.0207368		0.0645765	0.0515924	0.0635292	0.0652939
496	0.0198374	0.0150774	0.0195049	0.0209057		0.0651074	0.0520228	0.0640457	0.0658247
497	0.0202075	0.0153614	0.0198691	0.0212964		0.0662982	0.052984	0.0652222	0.0670443
498	0.0193308	0.0146965	0.0190057	0.0203713		0.0634001	0.0506742	0.0623671	0.0641174
499	0.0196397	0.014931	0.0193069	0.0206955		0.0644187	0.0514919	0.0633714	0.0651361
500	0.019119	0.0145334	0.0187962	0.0201488		0.0627258	0.050129	0.0616928	0.0634288
501	0.0188058	0.0142925	0.018485	0.0198165		0.0617215	0.0493255	0.0607028	0.0624101
502	0.0185473	0.0140867	0.0182304	0.0195445		0.0609467	0.0486799	0.0599424	0.061621
503	0.0193048	0.0146493	0.0189743	0.0203406		0.0635149	0.0506885	0.0624675	0.0642179
504	0.0186203	0.0140882	0.0183006	0.0196154		0.061578	0.0490099	0.0605593	0.062238
505	0.0195626	0.0148402	0.0192244	0.0206099		0.06439	0.0513915	0.0633283	0.0651074
506	0.0202079	0.015328	0.0198599	0.0212905		0.0665421	0.0530845	0.0654374	0.0672738
507	0.019247	0.0145973	0.0189146	0.0202758		0.0633857	0.0505594	0.0623384	0.0640744
508	0.0187076	0.0141984	0.0183872	0.0197109		0.0615349	0.0491247	0.0605306	0.0622236
509	0.0192809	0.0146377	0.0189491	0.0203134		0.0633857	0.0506024	0.0623384	0.0640887
510	0.0192237	0.0146013	0.0188937	0.020255		0.0631562	0.0504446	0.0621088	0.0638592
511	0.0198205	0.0150642	0.0194807	0.0208849		0.06505	0.0519941	0.063974	0.0657817
512	0.0200968	0.0152779	0.019753	0.0211753		0.0659252	0.0526971	0.0648348	0.0666569
513	0.0190801	0.0145076	0.0187536	0.0201041		0.0625679	0.0500285	0.0615349	0.063271
514	0.0190008	0.0144507	0.0186743	0.0200202		0.062281	0.0498133	0.061248	0.062984
515	0.0188584	0.0143421	0.0185314	0.019869		0.0618075	0.0494259	0.0607745	0.0624962
516	0.0188585	0.0143438	0.0185314	0.0198693		0.0618075	0.0494259	0.0607745	0.0624962
517	0.0167931	0.012774	0.0165026	0.0176933		0.0550213	0.0440171	0.0541031	0.0556383
518	0.0176843	0.0134511	0.0173783	0.0186329		0.0579482	0.0463557	0.0569869	0.0585938
519	0.0185759	0.0141279	0.018255	0.019572		0.060875	0.0486942	0.0598707	0.0615636
520	0.0192913	0.014671	0.0189569	0.020325		0.0632279	0.0505737	0.0621806	0.0639309
521	0.019523	0.0148487	0.0191852	0.0205693		0.0639883	0.0511763	0.0629266	0.0647057
522	0.0195894	0.014897	0.019249	0.0206388		0.0642035	0.0513485	0.0631418	0.0649352
523	0.0192838	0.0146639	0.0189478	0.0203152		0.0632136	0.0505594	0.0621519	0.0639166
524	0.0200092	0.0152113	0.019659	0.02108		0.0656095	0.0524675	0.0645192	0.0663556
525	0.0202722	0.0154057	0.0199174	0.0213563		0.0665278	0.0531849	0.0654087	0.0672738
526	0.0194302	0.0147656	0.0190883	0.0204672		0.0637588	0.0509754	0.0626827	0.0644761
527	0.0183535	0.0139439	0.0180284	0.0193329		0.060258	0.0481634	0.0592394	0.060918
528	0.019471	0.014792	0.0191269	0.0205103		0.0639309	0.0511046	0.0628549	0.0646483
529	0.0205698	0.0156239	0.0202043	0.0216659		0.0675608	0.0539883	0.066413	0.0683068
530	0.020326	0.0154373	0.0199632	0.0214098		0.0667573	0.0533427	0.0656239	0.0675034
531	0.0206798	0.0157056	0.0203103	0.0217835		0.0679338	0.0542896	0.0667717	0.0686942
532	0.0200169	0.0152018	0.0196584	0.0210833		0.065753	0.0525393	0.0646339	0.0664847
533	0.019474	0.0147898	0.0191245	0.0205107		0.0639596	0.0511189	0.0628692	0.064677
534	0.0200966	0.0152643	0.0197354	0.0211673		0.0659826	0.0527401	0.0648635	0.0667286
535	0.0205738	0.0156309	0.0202053	0.0216708		0.0675321	0.0539883	0.0663843	0.0682925
536	0.0207945	0.0158007	0.0204228	0.0219036		0.0682494	0.0545622	0.0670873	0.0690098
537	0.0200116	0.0152062	0.0196517	0.0210766		0.0656526	0.0524962	0.0645335	0.0663843
538	0.0203911	0.015495	0.0200247	0.0214751		0.0669008	0.0534862	0.065753	0.0676468
539	0.0202545	0.0153908	0.0198912	0.0213328		0.066456	0.0531275	0.0653226	0.0672021
540	0.0194368	0.0147659	0.0190865	0.0204709		0.0637874	0.0510041	0.0626971	0.0645048
541	0.0195359	0.0148266	0.0191832	0.0205739		0.0642179	0.0512911	0.0631131	0.0649352
542	0.0201785	0.0153104	0.019814	0.0212493		0.0663556	0.0529984	0.0652222	0.0671016
543	0.0200894	0.0152578	0.0197272	0.021157		0.0659682	0.0527258	0.0648348	0.0666999
544	0.0204251	0.0155017	0.0200558	0.0215103		0.0671447	0.0536297	0.0659969	0.0678907
545	0.020422	0.0155034	0.0200527	0.0215068		0.0671016	0.0536153	0.0659539	0.067862
546	0.0204834	0.0155357	0.020111	0.0215691		0.0674029	0.0538162	0.0662408	0.068149
547	0.0205714	0.0156155	0.0201986	0.021665		0.0676038	0.054017	0.0664417	0.0683642
548	0.0203872	0.0154776	0.0200141	0.0214681		0.0669725	0.0535149	0.0658104	0.0677186
549	0.0205092	0.0155766	0.0201364	0.0215988		0.0673312	0.0538305	0.0661834	0.0680916
550	0.020816	0.0158112	0.0204366	0.0219208		0.0683212	0.0546196	0.0671447	0.0690815
551	0.0206228	0.0156688	0.0202473	0.0217194		0.0676612	0.0541031	0.0664991	0.0684216
552	0.0208171	0.0158177	0.020437	0.0219211		0.0682925	0.0546196	0.067116	0.0690529
553	0.0204815	0.0155598	0.0201077	0.0215687		0.0672021	0.0537301	0.06604	0.0679481
554	0.0210213	0.015971	0.0206355	0.022136		0.0689668	0.0551505	0.067776	0.0697415
555	0.0211101	0.0160375	0.0207228	0.0222292		0.0692681	0.05538	0.0680629	0.0700428
556	0.020878	0.0158605	0.0204952	0.0219867		0.0685077	0.0547774	0.0673168	0.0692824
557	0.0202736	0.015399	0.0199004	0.0213484		0.0665421	0.0531992	0.06538	0.0672882
558	0.0201647	0.0153152	0.0197922	0.021234		0.0661978	0.0529267	0.06505	0.0669438
559	0.0198398	0.0150646	0.0194718	0.0208896		0.0651504	0.0520802	0.064017	0.0658821
560	0.0201388	0.0152911	0.0197648	0.0212058		0.0661404	0.0528693	0.0649783	0.0668864
561	0.020455	0.0155297	0.0200738	0.0215381		0.0671877	0.0537014	0.0660113	0.0679481
562	0.0203599	0.0154533	0.0199794	0.0214363		0.0669008	0.0534575	0.0657243	0.0676468
563	0.0209655	0.0159088	0.0205725	0.0220732		0.0689237	0.0550644	0.0677042	0.0696841
564	0.0204355	0.0155039	0.0200523	0.0215151		0.0672021	0.0536871	0.0660256	0.0679625
565	0.0203122	0.0154071	0.0199284	0.0213841		0.0668147	0.0533714	0.0656239	0.0675608
566	0.0200699	0.0152219	0.0196911	0.0211289		0.0660256	0.0527401	0.0648635	0.0667573
567	0.0204879	0.0155337	0.0201002	0.0215666		0.0674316	0.0538449	0.0662408	0.0681777
568	0.0202665	0.015345	0.0198834	0.0213322		0.0668577	0.0533284	0.0656669	0.0675894
569	0.0196124	0.0148038	0.0192392	0.0206388		0.0650213	0.0517215	0.0638592	0.0657243
570	0.019771	0.0149405	0.0193955	0.0208077		0.065423	0.0520945	0.0642609	0.0661404
571	0.0198462	0.0150209	0.0194684	0.0208881		0.0655091	0.052238	0.064347	0.0662265
572	0.0202666	0.0153122	0.0198793	0.0213283		0.0670873	0.0534145	0.0658821	0.067819
573	0.0205636	0.0155389	0.0201712	0.0216414		0.0680486	0.0541892	0.0668434	0.0687946
574	0.0205715	0.015545	0.0201784	0.0216497		0.0680772	0.0542179	0.0668577	0.0688233
575	0.0202287	0.01528	0.0198428	0.0212871		0.0669725	0.053314	0.0657817	0.0677042
576	0.020111	0.015194	0.0197264	0.0211632		0.0665565	0.0529984	0.0653656	0.0672882
577	0.0203749	0.0153981	0.0199857	0.02144		0.0674029	0.0536871	0.0661978	0.0681346
578	0.0201459	0.0152355	0.0197629	0.021201		0.0665565	0.0530414	0.06538	0.0672882
579	0.0202632	0.015336	0.0198776	0.0213265		0.0668577	0.053314	0.0656669	0.0676038
580	0.0206479	0.0156422	0.0202557	0.0217318		0.0680342	0.0542896	0.066829	0.0687803
581	0.0207751	0.0157492	0.0203819	0.0218678		0.0683642	0.0545909	0.067159	0.0691246
582	0.0211789	0.0160661	0.0207778	0.0222936		0.0696267	0.0556239	0.0683929	0.0704015
583	0.021253	0.0161307	0.020852	0.0223716		0.0698133	0.0557961	0.0685794	0.070588
584	0.0214401	0.0162762	0.0210363	0.0225708		0.0704015	0.0562839	0.0691533	0.0711906
585	0.0209288	0.0158886	0.0205342	0.0220321		0.0687085	0.0549353	0.0675034	0.0694833
586	0.0204735	0.0155358	0.0200869	0.0215509		0.0672595	0.0537588	0.0660686	0.0680199
587	0.0208259	0.0157813	0.0204324	0.0219201		0.0685794	0.0547344	0.0673599	0.0693398
588	0.0199097	0.0150064	0.0195335	0.0209446		0.0661117	0.0525249	0.0649352	0.0668147
589	0.0171145	0.0128082	0.0167912	0.0179972		0.0575034	0.0453801	0.0564847	0.058106
590	0.0179302	0.0134182	0.0175915	0.018854		0.0602437	0.0475465	0.0591677	0.0608606
591	0.0192907	0.0144832	0.0189257	0.0202882		0.0644618	0.0510328	0.063314	0.0651361
592	0.0189699	0.0142285	0.0186113	0.0199508		0.0635005	0.050215	0.0623814	0.0641748
593	0.0196003	0.0147563	0.0192299	0.0206208		0.0652222	0.0517502	0.06406	0.0659108
594	0.0194555	0.014637	0.019087	0.0204638		0.0648061	0.0513772	0.0636583	0.0654948
595	0.0187996	0.0140984	0.0184429	0.0197741		0.0629553	0.0497846	0.0618362	0.0636153
596	0.0200643	0.0151339	0.0196804	0.021108		0.0665565	0.0529123	0.0653656	0.0672738
597	0.0198549	0.0149656	0.0194732	0.0208882		0.0659395	0.0523815	0.0647487	0.0666425
598	0.0199611	0.0150668	0.0195777	0.0209995		0.0661404	0.0526254	0.0649496	0.0668577
599	0.0201287	0.0152105	0.0197411	0.0211772		0.0665708	0.0530127	0.0653656	0.0673025
600	0.0203735	0.0154287	0.0199802	0.021439		0.067159	0.0535866	0.0659395	0.0679051
601	0.0203817	0.0154584	0.0199867	0.0214494		0.0670012	0.0535292	0.0657961	0.0677473
602	0.0203099	0.0154106	0.0199173	0.0213753		0.0667286	0.0533284	0.0655235	0.0674747
603	0.0207143	0.0157265	0.0203144	0.0218016		0.0680055	0.0543757	0.0667717	0.0687659
604	0.0210998	0.0160231	0.0206927	0.0222086		0.0692394	0.05538	0.0679912	0.0700141
605	0.0210446	0.0159848	0.0206388	0.0221499		0.0690242	0.0552079	0.067776	0.0697989
606	0.0210056	0.0159632	0.0206022	0.0221102		0.0688376	0.0550931	0.0676038	0.0696124
607	0.0212592	0.016162	0.0208507	0.0223784		0.0696124	0.0557243	0.0683642	0.0704015
608	0.0210607	0.0160176	0.0206573	0.0221691		0.0689237	0.0551935	0.0676899	0.0696985
609	0.0211272	0.0160734	0.0207239	0.0222396		0.0691102	0.0553513	0.0678764	0.069885
610	0.0209812	0.0159644	0.0205824	0.0220872		0.0686081	0.0549639	0.0673886	0.0693828
611	0.0211244	0.0160763	0.0207226	0.0222373		0.0690529	0.0553226	0.067819	0.0698419
612	0.0210732	0.016038	0.0206745	0.0221835		0.0688807	0.0551792	0.0676612	0.0696554
613	0.0208285	0.0158537	0.0204364	0.0219251		0.0680629	0.0545335	0.0668577	0.0688376
614	0.0205687	0.0156593	0.0201813	0.0216521		0.0671877	0.0538449	0.0659969	0.0679481
615	0.0210466	0.0160286	0.0206525	0.0221568		0.0687085	0.0550787	0.0675034	0.0694976
616	0.0203775	0.0155202	0.0199959	0.0214517		0.0665134	0.053314	0.0653369	0.0672595
617	0.0203583	0.0155076	0.019978	0.0214312		0.0664273	0.0532566	0.0652652	0.0671877
618	0.0211638	0.016122	0.0207698	0.0222801		0.0690529	0.0553513	0.0678333	0.0698276
619	0.0209764	0.0159809	0.0205864	0.0220825		0.0684216	0.0548635	0.0672308	0.0692107
620	0.0211201	0.0160882	0.0207289	0.0222344		0.0689094	0.0552509	0.0677042	0.0696985
621	0.0211466	0.0160992	0.0207543	0.0222582		0.0690529	0.055337	0.0678477	0.0698276
622	0.020781	0.0157989	0.0203969	0.0218728		0.0680055	0.0544331	0.066829	0.0687803
623	0.020351	0.0154525	0.0199744	0.0214177		0.066743	0.0533714	0.0655808	0.0675034
624	0.0200991	0.0152705	0.0197281	0.0211521		0.0658391	0.0526684	0.0646913	0.0665851
625	0.0202054	0.0153663	0.0198336	0.0212665		0.066083	0.0529123	0.0649352	0.066829
626	0.0205366	0.0156164	0.0201596	0.0216146		0.0671734	0.0537731	0.0660113	0.0679338
627	0.0207127	0.0157278	0.0203316	0.0217948		0.0679051	0.054304	0.0667143	0.0686655
628	0.0195489	0.0147163	0.0191898	0.0205552		0.0649783	0.0515924	0.0638448	0.0656669
629	0.0203443	0.0154035	0.0199717	0.0214015		0.0670012	0.0534432	0.0658391	0.0677329
630	0.0200449	0.0151873	0.0196787	0.0210885		0.0659395	0.0526397	0.0647918	0.0666712
631	0.0205174	0.0155956	0.020144	0.0215932		0.0671447	0.0537444	0.0659826	0.0679051
632	0.020142	0.0152993	0.0197753	0.021194		0.0659826	0.0527688	0.0648348	0.0667143
633	0.0208627	0.0158771	0.020484	0.0219577		0.0681346	0.0545766	0.0669582	0.0689094
634	0.0207296	0.0157974	0.0203527	0.02182		0.0675464	0.0541749	0.0663843	0.0683212
635	0.0210487	0.0160447	0.0206678	0.022156		0.0685507	0.0549926	0.0673742	0.0693398
636	0.0207904	0.0158554	0.0204153	0.0218845		0.0676612	0.0542896	0.0664991	0.0684359
637	0.0211264	0.016116	0.0207455	0.0222393		0.0687229	0.0551648	0.0675464	0.069512
638	0.0213958	0.0163369	0.0210109	0.0225261		0.0694976	0.0558248	0.0683068	0.0703011
639	0.0211832	0.016179	0.0208025	0.0223015		0.0687659	0.0552509	0.0675894	0.069555
640	0.0210185	0.0160612	0.0206418	0.0221289		0.0681777	0.0547918	0.0670156	0.0689668
641	0.021025	0.0160695	0.0206489	0.0221366		0.0681633	0.0547918	0.0670012	0.0689524
642	0.0209672	0.0160333	0.020593	0.0220768		0.0679338	0.0546196	0.0667717	0.0687229
643	0.0212251	0.0162235	0.0208466	0.0223462		0.0687946	0.0553083	0.0676325	0.069598
644	0.0211949	0.0162086	0.0208196	0.022317		0.0686511	0.0552079	0.067489	0.0694546
645	0.0211729	0.0161768	0.0207981	0.0222909		0.0686798	0.0551935	0.0675177	0.0694689
646	0.020426	0.0155549	0.0200647	0.0214969		0.0665995	0.0533714	0.0654804	0.0673599
647	0.0198371	0.0150375	0.0194853	0.0208725		0.0651791	0.0520228	0.0640744	0.0658965
648	0.0197414	0.0149457	0.0193918	0.0207648		0.0649926	0.0518076	0.0638879	0.0656956
649	0.0194367	0.0147225	0.0190935	0.020448		0.0639309	0.0509898	0.0628549	0.0646339
650	0.0200326	0.0152674	0.0196798	0.0210848		0.0652365	0.0522954	0.0641318	0.0659826
651	0.0209978	0.0160181	0.0206299	0.0221024		0.0682781	0.0547918	0.0671303	0.0690529
652	0.019461	0.0147253	0.0191191	0.0204699		0.0641174	0.0510759	0.0630414	0.0648204
653	0.0207464	0.0158275	0.0203831	0.0218391		0.067446	0.0541175	0.0663125	0.0682207
654	0.020568	0.0156946	0.0202086	0.0216497		0.0668434	0.053644	0.0657243	0.0676038
655	0.0195742	0.0148974	0.0192327	0.0205976		0.0638879	0.0511333	0.0628118	0.0646052
656	0.017458	0.0132998	0.0171529	0.0183723		0.0568721	0.0455953	0.0559252	0.0575177
657	0.0179132	0.0136475	0.0176014	0.0188534		0.0583642	0.0467717	0.0573886	0.0590242
658	0.0202671	0.0154759	0.0199142	0.0213341		0.0657817	0.0528262	0.064677	0.0665421
659	0.0204599	0.0156266	0.0201043	0.0215376		0.0663699	0.053314	0.0652652	0.0671303
660	0.0205015	0.015652	0.020145	0.0215803		0.0665421	0.0534432	0.0654374	0.0673168
661	0.0206244	0.0157407	0.0202667	0.021709		0.0669869	0.0537731	0.0658678	0.0677473
662	0.0206431	0.0157384	0.0202855	0.0217279		0.067159	0.0538736	0.06604	0.0679338
663	0.0203346	0.0155143	0.0199816	0.0214027		0.0660686	0.0530271	0.0649639	0.0668147
664	0.0207669	0.0158796	0.0204073	0.0218611		0.0672308	0.0540601	0.0661117	0.0680055
665	0.020899	0.0160024	0.0205381	0.0220049		0.0675034	0.0543327	0.0663843	0.0682925
666	0.02104	0.0161278	0.0206777	0.0221569		0.0678333	0.0546483	0.0667143	0.0686368
667	0.0211048	0.01619	0.0207419	0.0222271		0.0679625	0.0547774	0.066829	0.0687659
668	0.0211834	0.016261	0.0208186	0.0223113		0.0681346	0.0549496	0.0670012	0.0689381
669	0.0215411	0.0165414	0.021171	0.0226898		0.0692537	0.0558678	0.0681203	0.0700859
670	0.021491	0.0165068	0.0211233	0.0226372		0.0690672	0.0557243	0.0679338	0.069885
671	0.021516	0.0165286	0.0211489	0.0226642		0.0691246	0.0557817	0.0679912	0.0699424
672	0.0213625	0.0164118	0.0209978	0.022501		0.0686224	0.05538	0.067489	0.0694259
673	0.0217131	0.0166847	0.021343	0.0228727		0.0697272	0.0562695	0.0685794	0.0705593
674	0.0216624	0.0166474	0.021294	0.0228185		0.0695407	0.0561404	0.0684072	0.0703728
675	0.0214933	0.0165205	0.0211268	0.0226414		0.0689811	0.0556957	0.0678477	0.0698133
676	0.0216672	0.0166542	0.0212977	0.0228241		0.0695263	0.0561261	0.0683929	0.0703584
677	0.0214753	0.0165087	0.0211111	0.022622		0.0689094	0.0556239	0.067776	0.0697272
678	0.021556	0.0165714	0.0211907	0.0227078		0.0691533	0.0558391	0.0680199	0.0699854
679	0.0212343	0.0163259	0.0208744	0.0223683		0.0681203	0.0549926	0.0670012	0.0689237
680	0.0214346	0.0164799	0.0210711	0.0225792		0.0687516	0.0555091	0.0676181	0.0695694
681	0.0213218	0.0163931	0.0209614	0.0224594		0.0683785	0.0552079	0.0672595	0.0691963
682	0.0213232	0.0163952	0.0209628	0.0224614		0.0683929	0.0552222	0.0672738	0.0691963
683	0.0213078	0.0163839	0.0209479	0.0224461		0.0683355	0.0551792	0.0672164	0.0691533
684	0.0212166	0.0163116	0.0208603	0.0223498		0.0680629	0.0549496	0.0669438	0.0688663
685	0.021447	0.0164921	0.0210847	0.0225917		0.0687659	0.0555235	0.0676325	0.0695837
686	0.0213366	0.0164031	0.0209767	0.0224734		0.0684359	0.0552509	0.0673168	0.0692537
687	0.0156042	0.0114097	0.0153404	0.0163688		0.0541749	0.0419798	0.0532853	0.0546627
688	0.0176183	0.0131338	0.0173202	0.0184998		0.0593255	0.0467574	0.0583499	0.0599281
689	0.0176675	0.0131801	0.0173723	0.0185548		0.0594403	0.0468722	0.058479	0.0600572
690	0.0183095	0.0137434	0.0180021	0.0192345		0.0609898	0.0483356	0.0599998	0.0616354
691	0.0189462	0.0143107	0.0186281	0.0199127		0.0624819	0.0497703	0.0614632	0.0631705
692	0.0190992	0.0144654	0.0187807	0.0200783		0.0627258	0.0500572	0.0617071	0.0634144
693	0.018044	0.0135839	0.0177418	0.018965		0.0598707	0.0474891	0.0588951	0.060502
694	0.0174943	0.0131663	0.0172011	0.018385		0.0580629	0.0459826	0.057116	0.0586799
695	0.0186341	0.0141292	0.0183218	0.0195965		0.0611045	0.0487229	0.0601146	0.0617788
696	0.0186815	0.0141714	0.0183698	0.0196475		0.0612193	0.0488377	0.060215	0.0618936
697	0.0205893	0.0157525	0.0202457	0.0216734		0.0665421	0.0535149	0.0654661	0.0673168
698	0.0202527	0.0154878	0.0199154	0.0213172		0.0654948	0.0526541	0.0644331	0.0662552
699	0.0192379	0.0146126	0.0189171	0.0202346		0.0628979	0.0502437	0.0618793	0.0635866
700	0.0189865	0.0144152	0.0186703	0.0199684		0.0621232	0.0495981	0.0611189	0.0628118
701	0.01854	0.014021	0.0182334	0.0194929		0.0610758	0.0486082	0.0600859	0.0617358
702	0.018919	0.0143501	0.0186067	0.0198969		0.0620084	0.0494977	0.0610184	0.0626971
703	0.0190666	0.0144903	0.0187496	0.0200555		0.0622953	0.0497703	0.061291	0.0629984
704	0.0200551	0.0153095	0.0197233	0.0211011		0.0650643	0.0521806	0.064017	0.0658104
705	0.0198895	0.015134	0.0195597	0.0209232		0.0648348	0.051908	0.0637874	0.0655665
706	0.0201057	0.0153324	0.0197728	0.0211532		0.0653082	0.0523815	0.0642466	0.0660543
707	0.020148	0.015371	0.0198139	0.0211989		0.0653943	0.0524819	0.064347	0.0661547
708	0.0202206	0.0154195	0.0198858	0.0212738		0.0656669	0.0526828	0.0646052	0.066413
709	0.0205726	0.0157516	0.0202324	0.0216546		0.0663843	0.0534288	0.0653082	0.067159
710	0.0204176	0.0155958	0.0200807	0.0214841		0.0661404	0.0531275	0.0650643	0.0669008
711	0.020531	0.0157052	0.020192	0.0216072		0.0663412	0.0533571	0.0652652	0.067116
712	0.0206229	0.0158057	0.0202836	0.02171		0.0664417	0.0535149	0.0653656	0.0672164
713	0.020322	0.0155469	0.0199873	0.0213873		0.0656669	0.0528119	0.0646052	0.0664273
714	0.0204526	0.0156568	0.0201154	0.0215283		0.0660256	0.0531275	0.0649639	0.0668004
715	0.0194962	0.0148591	0.0191739	0.0205101		0.0633714	0.0508176	0.0623527	0.0641031
716	0.0193911	0.0147595	0.0190709	0.0203955		0.0631705	0.0505881	0.0621519	0.0638879
717	0.0149238	0.0110218	0.0146764	0.0156565		0.0509898	0.0397129	0.050172	0.0514632
718	0.0133362	0.00976198	0.0131162	0.0139824		0.0461835	0.0356383	0.0454374	0.0465709
719	0.0122572	0.00898245	0.0120542	0.0128517		0.0423815	0.0327115	0.0416928	0.0427402
720	0.0126402	0.00920472	0.0124314	0.0132479		0.0441175	0.033888	0.0434001	0.0444762
721	0.0151693	0.0112927	0.0149199	0.0159244		0.0511906	0.0401433	0.0503585	0.0516928
722	0.018596	0.0140927	0.0182895	0.0195493		0.0609898	0.0486655	0.0600141	0.0616641
723	0.0166753	0.012512	0.0164008	0.0175161		0.0555809	0.0439023	0.0546914	0.0561548
724	0.0143097	0.0106017	0.0140742	0.0150157		0.0486369	0.0379626	0.0478621	0.049096
725	0.0136888	0.010062	0.0134618	0.0143557		0.0471017	0.0364992	0.0463413	0.0475178
726	0.0145697	0.0107827	0.0143292	0.0152865		0.0496125	0.0386943	0.0488234	0.0500859
727	0.0152271	0.0113247	0.0149766	0.015983		0.0514632	0.0403155	0.0506311	0.0519654
728	0.0137797	0.010176	0.0135533	0.0144577		0.047073	0.0366283	0.0463126	0.0475034
729	0.0150176	0.0112218	0.0147711	0.0157716		0.0503729	0.0396412	0.0495694	0.050875
730	0.0156911	0.0116724	0.015433	0.0164688		0.0530127	0.0415494	0.0521663	0.0535292
731	0.0149173	0.0110802	0.0146726	0.0156574		0.050502	0.0395408	0.0496985	0.0509898
732	0.0167658	0.0126085	0.016491	0.0176124		0.055667	0.0440458	0.0547774	0.0562552
733	0.0184432	0.013988	0.0181412	0.0193914		0.0604446	0.0482208	0.059469	0.0611045
734	0.0191561	0.0145801	0.0188433	0.0201503		0.0624245	0.0499424	0.0614202	0.0631275
735	0.0186442	0.0141624	0.0183394	0.0196094		0.0609467	0.0486799	0.0599711	0.061621
736	0.0185831	0.0140958	0.0182799	0.0195365		0.060875	0.0485938	0.0598994	0.0615493
737	0.0186986	0.0141923	0.0183939	0.0196637		0.061205	0.0488664	0.0602294	0.0618793
738	0.0194248	0.0148257	0.0191079	0.0204362		0.062984	0.0505594	0.0619797	0.0637014
739	0.0190821	0.0145743	0.0187713	0.0200808		0.0618075	0.0496268	0.0608319	0.0625249
740	0.0198494	0.0152059	0.0195253	0.0208945		0.063974	0.0515063	0.0629553	0.0647344
741	0.0198132	0.0152039	0.0194907	0.0208598		0.0637014	0.0513485	0.0626827	0.0644474
742	0.0200211	0.0153949	0.0196964	0.0210848		0.0641461	0.0517932	0.0631275	0.0649065
743	0.0206149	0.0158619	0.0202781	0.0217124		0.0659826	0.0532997	0.0649209	0.0667717
744	0.0206914	0.0159418	0.0203534	0.0217974		0.066083	0.0534432	0.0650213	0.0668721
745	0.0208149	0.0160562	0.0204762	0.0219332		0.0663556	0.0537014	0.0652939	0.067159
746	0.0209363	0.0161502	0.0205958	0.022061		0.066743	0.054017	0.0656813	0.0675464
747	0.0210386	0.0162335	0.0206951	0.0221701		0.0670299	0.0542609	0.0659539	0.0678477
748	0.0210345	0.0162337	0.0206928	0.0221669		0.0670012	0.0542466	0.0659395	0.067819
749	0.0208314	0.0160774	0.0204904	0.0219519		0.0663412	0.0537157	0.0652796	0.0671447
750	0.0208472	0.0160917	0.0205079	0.0219693		0.0663843	0.0537588	0.0653369	0.0671877
751	0.020661	0.0159488	0.0203254	0.0217743		0.0657961	0.0532853	0.0647487	0.0665995
752	0.020782	0.0160422	0.020444	0.0219005		0.0661691	0.0535866	0.0651217	0.0669725
753	0.0209193	0.0161505	0.0205789	0.022046		0.0665995	0.053931	0.0655378	0.0674029
754	0.0209898	0.0162041	0.0206475	0.0221197		0.066829	0.0541175	0.065753	0.0676325
755	0.0208937	0.0161296	0.0205551	0.0220194		0.0665278	0.0538736	0.0654661	0.0673312
756	0.0209245	0.0161559	0.0205859	0.0220527		0.0665995	0.0539453	0.0655521	0.0674173
757	0.0209847	0.016201	0.0206437	0.0221145		0.0668004	0.0540888	0.0657243	0.0676038
758	0.0207551	0.0160216	0.0204189	0.0218711		0.0660686	0.0535005	0.0650213	0.0668721
759	0.0204329	0.0157364	0.0201015	0.0215229		0.0652939	0.0527832	0.0642466	0.0660686
760	0.00553248	0.00349212	0.00543986	0.00573935		0.0231563	0.0156527	0.0227833	0.023142
761	0.00357111	0.00210461	0.00351131	0.0036855		0.0159827	0.0101147	0.0157245	0.0158966
762	0.0122153	0.0087092	0.0120142	0.0127863		0.0439884	0.0333428	0.043271	0.044304
763	0.00745403	0.00492458	0.00733172	0.00776249		0.0296699	0.0209325	0.0291965	0.0297417
764	0.00996877	0.00688179	0.00980554	0.010414		0.0375465	0.0276326	0.0369439	0.0377474
765	0.0122722	0.00874662	0.0120711	0.0128471		0.0442036	0.033515	0.0435006	0.0445336
766	0.0141819	0.0103878	0.0139497	0.0148672		0.0490242	0.0380773	0.0482351	0.049469
767	0.0171124	0.0128337	0.0168337	0.0179629		0.0570012	0.0451792	0.0560974	0.0576038
768	0.0191942	0.0146544	0.0188832	0.0201877		0.0621806	0.0499568	0.0611906	0.0628979
769	0.0195022	0.0149511	0.0191855	0.0205241		0.0627688	0.0505737	0.0617645	0.0635005
770	0.0200577	0.0154467	0.0197325	0.021127		0.0640887	0.0518076	0.0630701	0.0648635
771	0.0201893	0.0155813	0.0198616	0.0212739		0.0643039	0.0520658	0.0632853	0.0650787
772	0.0202405	0.0156307	0.0199122	0.0213318		0.0644044	0.0521663	0.0633714	0.0651791
773	0.020404	0.0157598	0.0200744	0.0215055		0.0649065	0.0525823	0.0638735	0.0656956
774	0.02033	0.015704	0.0199992	0.0214263		0.0646626	0.0523815	0.0636296	0.0654374
775	0.0201988	0.0156052	0.0198711	0.02129		0.0642322	0.0520371	0.0632136	0.065007
776	0.0204722	0.0158167	0.0201384	0.0215776		0.065093	0.0527401	0.06406	0.0658821
777	0.0202286	0.0156299	0.0199003	0.0213215		0.0643183	0.0521089	0.0632853	0.065093
778	0.0201293	0.0155527	0.0198022	0.0212162		0.0640027	0.051865	0.062984	0.0647774
779	0.0201714	0.0155854	0.0198436	0.021261		0.0641461	0.0519654	0.0631131	0.0649209
780	0.0200872	0.0155215	0.0197607	0.0211719		0.0638592	0.0517502	0.0628405	0.0646339
781	0.0201329	0.0155569	0.0198052	0.0212205		0.0640027	0.051865	0.062984	0.0647774
782	0.020281	0.015671	0.019952	0.0213771		0.0644761	0.052238	0.0634431	0.0652509
783	0.0199517	0.015418	0.0196288	0.0210297		0.0634144	0.0513915	0.0624101	0.0641892
784	0.0200733	0.0155143	0.0197479	0.0211588		0.0638018	0.0516928	0.0627831	0.0645765
785	0.0198888	0.0153587	0.0195653	0.0209604		0.0632853	0.051248	0.0622667	0.0640457
786	0.0200822	0.0154989	0.0197569	0.0211623		0.0639596	0.0517789	0.062941	0.0647344
787	0.0194372	0.0149335	0.019122	0.0204739		0.0623671	0.0503011	0.0613628	0.0630988
788	0.0190654	0.0146203	0.0187564	0.020084		0.0613771	0.0494259	0.0604015	0.0620945
789	0.0189338	0.0144915	0.0186264	0.0199277		0.0611189	0.0491534	0.0601433	0.0618219
790	0.0181832	0.013873	0.0178884	0.0191322		0.0590242	0.0473026	0.0580773	0.0596985
791	0.0186641	0.0142908	0.0183618	0.019645		0.060215	0.048436	0.0592537	0.060918
792	0.0186332	0.0142858	0.0183313	0.0196173		0.0599998	0.0483069	0.0590385	0.0607028
793	0.0183072	0.0140245	0.0180119	0.0192709		0.0590242	0.0474747	0.0580773	0.0596985
794	0.0191467	0.0147704	0.0188376	0.0201753		0.0610184	0.0493829	0.0600572	0.0617645
795	0.0193435	0.0148913	0.0190301	0.0203762		0.0618649	0.0499855	0.060875	0.0625966
796	0.0181922	0.0138919	0.0178974	0.019145		0.0589381	0.0473026	0.0580055	0.0596124
797	0.0181689	0.0138621	0.0178761	0.0191355		0.0589812	0.0472882	0.0580486	0.0596555
798	0.0192689	0.0148084	0.0189577	0.0202905		0.0617788	0.0498564	0.0608032	0.0625249
799	0.0190618	0.014629	0.0187541	0.0200692		0.0612624	0.0493829	0.0603011	0.0619941
800	0.0185787	0.0142227	0.0182784	0.0195518		0.0599424	0.0482208	0.0589955	0.0606454

## Sheet: 20degN
20 degrees N latitude	Daily Irradiance (mE cm-2 d-1 nm-1)					Solar Noon Irradiance (mE cm-2 d-1 nm-1)
wavelength (nm)	March 20th	June 21st	September 22nd	December 22nd		March 20th	June 21st	September 22nd	December 22nd
280	1.36026e-18	1.9384e-18	1.37724e-18	4.01344e-20		1.95695e-17	2.60831e-17	1.97991e-17	2.08608e-19
281	4.9307e-17	6.93296e-17	4.98238e-17	1.44056e-18		6.81346e-16	8.94258e-16	6.8809e-16	7.70729e-18
282	2.00365e-15	2.77609e-15	2.01996e-15	7.51665e-17		2.6327e-14	3.39597e-14	2.65279e-14	5.13341e-16
283	1.57647e-14	1.80453e-14	1.58515e-14	5.1425e-16		1.94834e-13	2.14203e-13	1.95839e-13	3.83356e-15
284	2.03153e-13	2.36053e-13	2.03867e-13	6.63995e-15		2.40171e-12	2.59683e-12	2.40889e-12	5.31275e-14
285	6.31305e-13	7.14259e-13	6.32955e-13	1.99653e-14		7.28835e-12	7.55952e-12	7.3027e-12	1.65423e-13
286	1.12976e-11	1.27314e-11	1.13361e-11	2.59859e-13		1.32682e-10	1.33974e-10	1.33113e-10	2.2855e-12
287	5.81986e-11	7.04411e-11	5.81742e-11	2.35409e-12		6.18793e-10	6.8809e-10	6.18075e-10	2.11621e-11
288	3.83929e-10	4.52758e-10	3.83193e-10	2.01222e-11		3.83643e-09	4.13342e-09	3.82495e-09	1.82926e-10
289	2.54727e-09	2.96073e-09	2.5395e-09	1.58891e-10		2.44045e-08	2.58823e-08	2.43041e-08	1.44906e-09
290	1.47862e-08	1.78348e-08	1.47222e-08	1.10349e-09		1.35495e-07	1.4835e-07	1.34763e-07	9.61833e-09
291	4.45735e-08	5.19107e-08	4.43432e-08	4.25462e-09		3.91821e-07	4.11907e-07	3.89382e-07	3.58248e-08
292	1.73899e-07	2.02902e-07	1.7279e-07	2.32034e-08		1.43758e-06	1.53084e-06	1.42682e-06	1.85509e-07
293	3.80189e-07	4.47583e-07	3.77633e-07	6.64962e-08		3.00716e-06	3.29698e-06	2.98421e-06	5.10472e-07
294	7.93726e-07	1.11166e-06	7.87596e-07	1.7884e-07		5.87086e-06	7.88663e-06	5.82351e-06	1.302e-06
295	1.9194e-06	2.23853e-06	1.90292e-06	3.97497e-07		1.37087e-05	1.49067e-05	1.35825e-05	3.22954e-06
296	5.70725e-06	6.61969e-06	5.65448e-06	1.34854e-06		3.87804e-05	4.18363e-05	3.84073e-05	1.05093e-05
297	7.5833e-06	8.75481e-06	7.51038e-06	1.98381e-06		4.95694e-05	5.31419e-05	4.90673e-05	1.4921e-05
298	2.04306e-05	2.35042e-05	2.0223e-05	6.02863e-06		0.000127503	0.000136025	0.000126111	4.31562e-05
299	3.49633e-05	4.00645e-05	3.45924e-05	1.13237e-05		0.00021076	0.000223959	0.000208321	7.76181e-05
300	4.45772e-05	5.08683e-05	4.40865e-05	1.57912e-05		0.000256384	0.000272022	0.000253371	0.000101793
301	8.2985e-05	9.71262e-05	8.20454e-05	3.04983e-05		0.000459396	0.000498133	0.000453801	0.000191391
302	8.30252e-05	9.70122e-05	8.20694e-05	3.23639e-05		0.000448062	0.00048393	0.00044261	0.000197704
303	0.000228761	0.000264344	0.000226049	9.63134e-05		0.00118264	0.00126427	0.00116786	0.000561404
304	0.000234496	0.000270567	0.00023169	0.000102353		0.0011868	0.00126728	0.00117188	0.000582638
305	0.00039123	0.000449583	0.000386395	0.00018349		0.00189382	0.00201578	0.00186943	0.000993397
306	0.000373601	0.000428455	0.000368962	0.000181583		0.00176757	0.00187804	0.00174461	0.000957099
307	0.000601836	0.000640183	0.000594255	0.00030288		0.00272452	0.00271161	0.00268866	0.00154375
308	0.00071087	0.000816523	0.000701822	0.000366343		0.00315924	0.00334576	0.00311764	0.0018307
309	0.000672861	0.000772344	0.000664304	0.000352659		0.00294977	0.00312194	0.00291104	0.00173601
310	0.000675701	0.000774204	0.000666985	0.000366482		0.00287804	0.00304016	0.0028393	0.00174892
311	0.00129535	0.00148259	0.00127837	0.000712725		0.00544905	0.00575034	0.00537444	0.0033558
312	0.00114676	0.00131031	0.0011317	0.000646266		0.00472165	0.00497416	0.00465709	0.00297417
313	0.00139994	0.00159767	0.00138148	0.000804427		0.00565995	0.00595694	0.00558248	0.0036284
314	0.00165134	0.00188279	0.00162947	0.000958304		0.00661404	0.00695263	0.00652222	0.00427976
315	0.00175884	0.00200169	0.00173551	0.00104564		0.00687803	0.00721805	0.0067819	0.00454948
316	0.00125895	0.00143183	0.00124207	0.000753926		0.00488664	0.0051248	0.00481921	0.00325537
317	0.00213652	0.00242903	0.00210777	0.00129755		0.00817214	0.00860399	0.00805736	0.00551361
318	0.00170306	0.00193701	0.00168018	0.00104065		0.006472	0.00682494	0.00638161	0.00439166
319	0.00229155	0.00260334	0.00226059	0.00143601		0.00850069	0.00894402	0.00838161	0.00585794
320	0.00239669	0.00272558	0.00236444	0.0014809		0.00902149	0.00950356	0.00889524	0.00616784
321	0.00237869	0.00269994	0.00234636	0.00153877		0.00865994	0.00909323	0.00853799	0.00618649
322	0.00257321	0.00292139	0.00253825	0.00161795		0.00951073	0.0099971	0.0093773	0.00657674
323	0.00214166	0.00243046	0.00211262	0.0013614		0.00781633	0.00820514	0.00770729	0.00544618
324	0.00291954	0.00330916	0.00287946	0.0018771		0.0104376	0.0108809	0.0102898	0.00740887
325	0.00269131	0.00305318	0.00265464	0.00174241		0.00979193	0.0102726	0.0096542	0.00700715
326	0.00401918	0.00455486	0.00396427	0.00258984		0.0143357	0.0149354	0.0141319	0.0101994
327	0.0039681	0.00449686	0.00391374	0.00256908		0.0140746	0.0146628	0.0138737	0.0100531
328	0.00356388	0.00403726	0.0035151	0.00228156		0.0128149	0.0133529	0.0126341	0.00907744
329	0.00421438	0.00477555	0.00415696	0.00274987		0.0148063	0.0154232	0.0146054	0.0106499
330	0.00482808	0.00547063	0.00476232	0.00315337		0.016944	0.017647	0.0167144	0.0121994
331	0.00405756	0.00459527	0.00400189	0.00262855		0.0143902	0.0149784	0.0141822	0.0102941
332	0.00430347	0.00487345	0.00424417	0.00282184		0.0150358	0.0156527	0.0148206	0.0108637
333	0.00423352	0.00479454	0.00417583	0.00278053		0.0147632	0.0153658	0.0145624	0.0106829
334	0.00400937	0.00453988	0.00395439	0.00261875		0.0140803	0.0146484	0.0138794	0.0101463
335	0.00441868	0.00479587	0.00435864	0.00289868		0.0153515	0.0152941	0.0151362	0.0111018
336	0.00342079	0.00388101	0.0033736	0.00224704		0.0118809	0.0123687	0.0117101	0.00859968
337	0.00334523	0.00378628	0.00329921	0.00219889		0.0116614	0.0121219	0.0114949	0.00845191
338	0.00420375	0.00455481	0.00414567	0.00276102		0.0145911	0.014505	0.0143758	0.0105667
339	0.00457857	0.00519157	0.00451622	0.00301276		0.0158823	0.0165279	0.0156671	0.0115179
340	0.00542796	0.00589908	0.00535335	0.00356811		0.0188235	0.0187661	0.0185509	0.0136484
341	0.0045719	0.00518229	0.00450831	0.00301075		0.0158536	0.0164849	0.0156241	0.0115035
342	0.00502333	0.00569154	0.0049544	0.00331232		0.0174031	0.0180918	0.0171592	0.0126441
343	0.00519115	0.00588124	0.00511989	0.00342471		0.017977	0.01868	0.0177187	0.0130703
344	0.00374839	0.00424968	0.00369687	0.00246917		0.012977	0.0134978	0.0127919	0.00943469
345	0.00484592	0.00548852	0.0047796	0.00319967		0.0167575	0.0174174	0.0165279	0.0122051
346	0.00421171	0.00476825	0.00415354	0.00278362		0.0145624	0.0151219	0.0143472	0.0106083
347	0.00512908	0.00580638	0.00505867	0.00339098		0.0177187	0.0184074	0.0174748	0.0129225
348	0.00473616	0.00536068	0.00467128	0.00313325		0.0163558	0.016987	0.0161262	0.0119325
349	0.00440079	0.00498056	0.0043405	0.00291372		0.0151936	0.0157675	0.0149784	0.0110889
350	0.00540711	0.00611674	0.00533183	0.00358222		0.0186513	0.0193543	0.0183787	0.0136269
351	0.00509888	0.00576891	0.00502919	0.00337814		0.0175896	0.0182496	0.0173314	0.0128522
352	0.00533988	0.00604239	0.00526722	0.00353922		0.0184074	0.0191104	0.0181492	0.0134634
353	0.0052604	0.00594879	0.00518761	0.00348901		0.0181205	0.0187948	0.0178622	0.0132611
354	0.00582818	0.00659144	0.00574737	0.00386578		0.0200717	0.0208321	0.0197847	0.0146915
355	0.00591328	0.00668643	0.00583152	0.00392343		0.0203586	0.021119	0.0200717	0.0149067
356	0.00561602	0.00634993	0.00553902	0.00373037		0.0193256	0.020043	0.0190387	0.0141635
357	0.00396661	0.00448456	0.00391202	0.00263456		0.0136456	0.0141535	0.0134505	0.0100028
358	0.00386076	0.00436436	0.00380766	0.00256535		0.0132754	0.0137675	0.013086	0.00973741
359	0.0046329	0.00523669	0.0045694	0.00307944		0.0159253	0.0165136	0.0156958	0.0116858
360	0.00627665	0.00709515	0.0061908	0.00417334		0.0215638	0.0223672	0.0212625	0.0158393
361	0.00457721	0.00517304	0.00451472	0.00304442		0.0157245	0.0162984	0.0154949	0.011548
362	0.00456826	0.00516157	0.00450565	0.00304126		0.0156814	0.0162553	0.0154519	0.0115265
363	0.00568694	0.00642495	0.00560845	0.00378888		0.0194978	0.0202151	0.0192252	0.0143472
364	0.00642149	0.00725225	0.00633314	0.00428092		0.0220085	0.0227976	0.0216929	0.0162123
365	0.00559339	0.00631729	0.00551705	0.00372954		0.0191678	0.0198565	0.0188952	0.0141176
366	0.0074586	0.00842268	0.00735615	0.00497552		0.0255379	0.0264562	0.0251793	0.0188235
367	0.00684108	0.00772319	0.00674636	0.00456561		0.0234146	0.0242467	0.0230702	0.017274
368	0.00621687	0.00701875	0.0061306	0.00415021		0.0212768	0.0220229	0.0209612	0.0156958
369	0.00679867	0.00767549	0.00670581	0.00454172		0.0232424	0.0240745	0.0229124	0.0171592
370	0.00775155	0.00875045	0.00764531	0.00518126		0.0264848	0.0274318	0.0261118	0.0195695
371	0.00645099	0.00728142	0.00636235	0.00431402		0.0220372	0.022812	0.0217216	0.016284
372	0.0053611	0.00605001	0.00528743	0.00358584		0.018307	0.0189526	0.0180487	0.0135365
373	0.00656186	0.0074014	0.00646987	0.00439129		0.0223959	0.0231707	0.0220659	0.016571
374	0.00622094	0.00701761	0.00613444	0.00416497		0.0212194	0.0219511	0.0209182	0.0157101
375	0.00502169	0.00566472	0.00495296	0.00336415		0.0171162	0.0177187	0.0168723	0.0126829
376	0.00622177	0.00701695	0.00613585	0.00416793		0.0212051	0.0219368	0.0209038	0.0157101
377	0.00684778	0.00772271	0.00675403	0.00458929		0.0233285	0.0241319	0.0229985	0.0172883
378	0.00871822	0.00983043	0.00859812	0.00584647		0.0296843	0.0307029	0.0292682	0.0220229
379	0.00681769	0.0076881	0.00672405	0.00457197		0.0232137	0.0240171	0.0228837	0.0172166
380	0.00648351	0.00731065	0.00639462	0.00434785		0.0220803	0.0228263	0.0217646	0.0163701
381	0.00789531	0.00890163	0.00778627	0.00529818		0.0268579	0.0277761	0.0264705	0.0199425
382	0.00557318	0.00628089	0.00549611	0.00374217		0.0189526	0.0195839	0.01868	0.014076
383	0.00441107	0.0049714	0.00435042	0.00296405		0.0149928	0.0154949	0.0147776	0.011142
384	0.0046936	0.00528987	0.00462909	0.00315492		0.0159397	0.0164849	0.0157101	0.0118565
385	0.00686283	0.00773437	0.00676829	0.00461522		0.0232998	0.0240889	0.0229698	0.0173314
386	0.00549312	0.0061908	0.00541755	0.00369648		0.018637	0.0192682	0.0183644	0.013878
387	0.0060152	0.00677676	0.00593111	0.00404871		0.0204017	0.021076	0.0201004	0.0151936
388	0.00625383	0.00704523	0.00616677	0.00421091		0.0212051	0.0219081	0.0208895	0.0157962
389	0.00669092	0.00753501	0.00659798	0.00450666		0.0226685	0.0234146	0.0223385	0.0169009
390	0.0081549	0.00918493	0.00804214	0.00549657		0.0276183	0.0285365	0.0272166	0.0206025
391	0.0088602	0.00997803	0.00873889	0.00597368		0.0299856	0.0309755	0.0295551	0.0223816
392	0.00762552	0.00858665	0.00752038	0.00514295		0.0258105	0.026657	0.0254375	0.0192682
393	0.00381361	0.0042937	0.00376104	0.00257378		0.0128967	0.0133185	0.0127116	0.00963555
394	0.00565693	0.0063693	0.00557987	0.00381989		0.0191248	0.0197417	0.0188522	0.0142941
395	0.00879612	0.00990271	0.0086754	0.0059411		0.0297273	0.0306886	0.0292969	0.0222237
396	0.00775908	0.00873407	0.007653	0.0052421		0.0262123	0.0270587	0.0258392	0.0196126
397	0.00341842	0.00384697	0.00337102	0.00231101		0.011538	0.011911	0.011373	0.00863699
398	0.00974545	0.0109683	0.00961134	0.00658774		0.032898	0.0339597	0.0324246	0.0246197
399	0.0109465	0.0123168	0.0107953	0.00740463		0.0369296	0.038106	0.0363987	0.0276613
400	0.0113425	0.0127642	0.0111858	0.00767358		0.0382639	0.0394834	0.0377043	0.0286656
401	0.0116692	0.0131306	0.0115088	0.00789034		0.0393829	0.0406455	0.0388234	0.0294977
402	0.0123598	0.0139042	0.0121877	0.00836152		0.0416785	0.0430128	0.0410759	0.0312338
403	0.0117803	0.013252	0.011618	0.00797499		0.0396986	0.0409611	0.039139	0.0297703
404	0.0116157	0.0130669	0.0114559	0.00786559		0.039139	0.0403872	0.0385795	0.0293543
405	0.0116352	0.0130871	0.0114748	0.00788029		0.0391964	0.0404446	0.0386369	0.0294117
406	0.01149	0.0129212	0.0113302	0.00778656		0.0386799	0.0398994	0.0381204	0.0290386
407	0.011348	0.0127598	0.0111906	0.00769593		0.0381778	0.0393686	0.0376182	0.02868
408	0.0117929	0.0132595	0.0116299	0.00799519		0.0396842	0.0409181	0.0391103	0.029799
409	0.0126484	0.014221	0.0124736	0.0085784		0.0425393	0.0438736	0.0419367	0.0319655
410	0.0110783	0.0124545	0.0109258	0.00751635		0.0372452	0.0384073	0.0367144	0.0279913
411	0.0120334	0.0135268	0.0118661	0.00816795		0.0404303	0.0416928	0.0398564	0.030416
412	0.0129699	0.0145765	0.0127914	0.00881041		0.0435436	0.0448922	0.0429267	0.0327832
413	0.0126452	0.0142144	0.0124705	0.00858809		0.0424676	0.0437875	0.041865	0.0319511
414	0.0128432	0.0144351	0.0126658	0.00872743		0.0431132	0.0444331	0.0424963	0.0324533
415	0.0129174	0.0145157	0.0127395	0.00878267		0.0433284	0.0446627	0.0427115	0.0326398
416	0.0131967	0.0148268	0.0130144	0.00897959		0.0442323	0.0455809	0.043601	0.0333428
417	0.0128988	0.0144915	0.012719	0.00877855		0.043228	0.0445479	0.0425967	0.0325967
418	0.0126842	0.0142497	0.0125082	0.008634		0.0424963	0.0437875	0.0418793	0.0320515
419	0.012878	0.0144669	0.0126999	0.00876767		0.0431275	0.0444475	0.0425106	0.0325393
420	0.0128459	0.0144304	0.0126685	0.00874854		0.0430128	0.0443184	0.0423958	0.0324676
421	0.0134753	0.0151346	0.0132881	0.00917973		0.0451075	0.0464704	0.0444475	0.0340458
422	0.0128352	0.0144164	0.0126572	0.00874698		0.0429554	0.0442466	0.0423385	0.0324389
423	0.0125723	0.0141179	0.0123985	0.00857009		0.0420515	0.0433141	0.0414489	0.0317646
424	0.0133236	0.0149606	0.0131393	0.00908193		0.0445623	0.0458965	0.0439166	0.0336584
425	0.0133436	0.0149824	0.0131593	0.00910124		0.0446053	0.0459396	0.0439597	0.0337158
426	0.0130507	0.0146503	0.0128695	0.00890958		0.0435867	0.0448779	0.0429554	0.0329698
427	0.0128226	0.0143966	0.0126463	0.00875457		0.0428119	0.0440888	0.0422093	0.0323959
428	0.0125037	0.0140374	0.01233	0.00853721		0.0417502	0.0429984	0.0411476	0.0315924
429	0.0118923	0.0133485	0.0117283	0.00812677		0.0396699	0.0408463	0.039096	0.0300429
430	0.0104322	0.0117094	0.0102876	0.00713167		0.0347919	0.0358105	0.0342897	0.0263557
431	0.0103461	0.0116107	0.0102034	0.0070704		0.0345049	0.0355236	0.0340171	0.0261405
432	0.0134119	0.0150505	0.0132256	0.00917243		0.0447057	0.0460113	0.0440601	0.033888
433	0.0135198	0.0151686	0.0133317	0.00924847		0.0450501	0.0463557	0.0443901	0.0341462
434	0.0125684	0.0141015	0.0123939	0.00859741		0.0418793	0.0430989	0.0412768	0.0317503
435	0.0131358	0.0147383	0.0129527	0.00898413		0.0437732	0.0450501	0.0431419	0.033185
436	0.0148525	0.0166639	0.0146463	0.0101671		0.0494546	0.0509037	0.0487373	0.0375178
437	0.0147101	0.0165008	0.0145063	0.0100775		0.0489381	0.0503585	0.0482351	0.0371591
438	0.0134381	0.0150713	0.0132523	0.00921081		0.044677	0.0459683	0.0440314	0.0339454
439	0.0138735	0.0155641	0.0136816	0.00949973		0.0461835	0.0475178	0.0455235	0.0350501
440	0.0143688	0.0161166	0.0141682	0.00984454		0.0477904	0.049182	0.0471017	0.0362983
441	0.0149633	0.0167801	0.0147558	0.0102608		0.0497272	0.0511476	0.0490099	0.0377904
442	0.0160875	0.0180389	0.0158639	0.0110343		0.0534432	0.0549783	0.0526684	0.0406311
443	0.015659	0.0175598	0.0154415	0.0107332		0.0520515	0.0535579	0.0513054	0.0395551
444	0.0160434	0.0179897	0.015821	0.0110024		0.053314	0.0548348	0.0525393	0.0405164
445	0.0156911	0.0175967	0.0154743	0.0107573		0.0521663	0.0536584	0.0514059	0.0396268
446	0.0150401	0.0168641	0.0148332	0.0103213		0.0499424	0.0513628	0.0492251	0.0379913
447	0.016321	0.0182954	0.0160954	0.0112094		0.0541462	0.0556813	0.0533714	0.0412194
448	0.016555	0.0185626	0.0163263	0.0113599		0.0549783	0.0565421	0.0541892	0.0418076
449	0.0167087	0.0187283	0.016478	0.0114793		0.0554087	0.0569726	0.0546196	0.042195
450	0.0172363	0.019318	0.0169976	0.0118482		0.0571304	0.0587373	0.0562982	0.0435293
451	0.017912	0.0200727	0.0176633	0.0123148		0.0593542	0.0610184	0.0584933	0.0452366
452	0.0172935	0.0193788	0.017054	0.011891		0.0572882	0.0588951	0.0564704	0.0436727
453	0.0162991	0.0182646	0.0160728	0.0112103		0.0539883	0.0554948	0.0531992	0.041162
454	0.0170669	0.0191225	0.0168317	0.011745		0.0564847	0.0580629	0.0556813	0.0430845
455	0.0171951	0.0192663	0.0169562	0.0118335		0.0569152	0.0585077	0.0560974	0.0434145
456	0.0176537	0.0197769	0.0174086	0.0121536		0.0584073	0.0600428	0.0575751	0.0445766
457	0.0179982	0.0201612	0.0177482	0.012393		0.0595407	0.0611906	0.0586799	0.0454518
458	0.0173985	0.01949	0.0171566	0.0119728		0.0575895	0.059182	0.0567573	0.043931
459	0.0173657	0.0194506	0.017125	0.0119572		0.0574604	0.0590385	0.0566282	0.0438593
460	0.0174459	0.0195402	0.0172033	0.012011		0.057733	0.0593255	0.0569008	0.0440601
461	0.0178885	0.020035	0.0176397	0.0123177		0.059182	0.0608176	0.0583212	0.0451792
462	0.0180827	0.0202496	0.0178314	0.0124582		0.0597846	0.0614202	0.0589238	0.045667
463	0.0179488	0.0201017	0.0176993	0.0123598		0.0593685	0.0610041	0.0585077	0.0453227
464	0.0177008	0.0198223	0.0174545	0.012197		0.0585077	0.0601146	0.0576612	0.0446914
465	0.0175369	0.0196359	0.0172936	0.0120947		0.0579051	0.0594977	0.057073	0.0442753
466	0.0177632	0.0198863	0.0175174	0.012258		0.0586225	0.060215	0.057776	0.0448349
467	0.0174415	0.0195282	0.0171994	0.0120294		0.0575895	0.0591533	0.0567573	0.0440314
468	0.0176971	0.0198131	0.0174519	0.0122085		0.0584216	0.0600141	0.0575751	0.044677
469	0.017847	0.0199794	0.0175987	0.0123146		0.0588951	0.060502	0.0580486	0.0450501
470	0.0173066	0.0193734	0.0170658	0.0119396		0.057116	0.0586799	0.0562982	0.0436871
471	0.0173329	0.0194017	0.017092	0.0119618		0.0571878	0.0587373	0.05637	0.0437588
472	0.0182963	0.0204797	0.0180412	0.0126254		0.0603728	0.0620084	0.0594977	0.0461835
473	0.0180977	0.0202591	0.0178469	0.0124892		0.0597129	0.0613341	0.058852	0.0456813
474	0.0181354	0.0203022	0.0178833	0.012507		0.059885	0.0615063	0.0590098	0.0457818
475	0.0183524	0.0205452	0.0180979	0.0126556		0.0606024	0.0622523	0.0597272	0.046327
476	0.0178858	0.0200219	0.0176381	0.0123333		0.0590672	0.0606741	0.0582208	0.0451648
477	0.0179955	0.0201448	0.0177465	0.0124071		0.0594403	0.0610615	0.0585938	0.0454374
478	0.0185357	0.0207481	0.0182786	0.0127837		0.0612193	0.0628836	0.0603298	0.0468148
479	0.0184484	0.0206462	0.0181908	0.0127255		0.060918	0.0625679	0.0600285	0.0465996
480	0.0185064	0.0207098	0.0182506	0.0127683		0.0610902	0.0627401	0.060215	0.046743
481	0.0188996	0.0211467	0.0186375	0.013048		0.0623527	0.0640314	0.0614632	0.0477473
482	0.0190465	0.0213068	0.0187814	0.0131571		0.0627975	0.0644761	0.0618936	0.048106
483	0.0188687	0.0211048	0.018606	0.0130435		0.0621662	0.0638161	0.0612624	0.0476612
484	0.0185153	0.0207089	0.0182575	0.0128021		0.0609754	0.0625966	0.0601002	0.0467574
485	0.0176532	0.0197449	0.0174078	0.0122061		0.0581347	0.0596698	0.0572882	0.0445766
486	0.0154586	0.0172892	0.0152425	0.010692		0.050875	0.0522236	0.0501433	0.0390243
487	0.0162387	0.0181602	0.0160132	0.011237		0.0534288	0.0548348	0.0526541	0.0409898
488	0.0178276	0.0199379	0.0175792	0.0123333		0.0586655	0.060215	0.057819	0.045007
489	0.0178945	0.0200135	0.017646	0.0123742		0.0589238	0.0604733	0.0580629	0.0451792
490	0.0188977	0.021132	0.0186348	0.0130771		0.0621806	0.0638161	0.0612767	0.0477186
491	0.0186414	0.0208418	0.018381	0.0129068		0.061291	0.0628979	0.0604015	0.0470587
492	0.0176397	0.0197205	0.0173949	0.0122146		0.0579912	0.059512	0.0571591	0.0445336
493	0.0182505	0.0204045	0.0179969	0.0126383		0.0599998	0.0615636	0.0591246	0.0460687
494	0.0184534	0.0206292	0.0181973	0.0127777		0.0606741	0.0622523	0.0597846	0.0465852
495	0.0186449	0.0208432	0.0183857	0.0129109		0.061291	0.0628979	0.0604015	0.047073
496	0.0187971	0.0210123	0.0185354	0.0130165		0.0617932	0.0634001	0.0609037	0.0474604
497	0.0191487	0.0214047	0.018882	0.0132626		0.0629266	0.0645765	0.0620227	0.0483499
498	0.0183171	0.0204713	0.0180623	0.012691		0.0601863	0.0617502	0.0593111	0.0462552
499	0.0186086	0.020796	0.0183488	0.0128931		0.0611476	0.0627258	0.060258	0.0469869
500	0.0181139	0.0202433	0.0178622	0.0125496		0.0595263	0.0610758	0.0586655	0.0457531
501	0.0178141	0.0199082	0.0175667	0.0123386		0.0585794	0.0600859	0.057733	0.045007
502	0.0175665	0.0196328	0.0173218	0.0121524		0.0578334	0.0593398	0.0569869	0.0443901
503	0.018279	0.0204312	0.0180243	0.0126311		0.060258	0.0618362	0.0593829	0.0462122
504	0.0176145	0.019707	0.0173696	0.012115		0.0583642	0.0599424	0.0575177	0.0445479
505	0.0185183	0.0206999	0.0182611	0.0127921		0.0610758	0.0626827	0.0602007	0.0468291
506	0.0191285	0.0213833	0.0188621	0.0132092		0.0631131	0.0647774	0.0621949	0.0483643
507	0.0182194	0.0203666	0.0179654	0.0125801		0.0601146	0.0616928	0.0592394	0.0460687
508	0.0177122	0.019796	0.0174657	0.0122416		0.0583786	0.0598994	0.0575321	0.0447775
509	0.0182567	0.0204034	0.0180026	0.0126263		0.0601289	0.0616928	0.0592537	0.0461404
510	0.0182057	0.0203443	0.0179522	0.0125973		0.0599281	0.0614776	0.0590529	0.0460113
511	0.0187739	0.0209757	0.0185135	0.013003		0.0617358	0.063314	0.0608463	0.047446
512	0.0190372	0.0212679	0.0187724	0.0131912		0.0625679	0.0641748	0.0616641	0.048106
513	0.0180747	0.0201908	0.0178224	0.0125276		0.0593829	0.0609037	0.058522	0.045667
514	0.0180003	0.0201053	0.0177492	0.0124812		0.0591103	0.0606167	0.0582638	0.0454805
515	0.0178631	0.0199507	0.0176144	0.0123882		0.0586512	0.0601433	0.0578047	0.0451361
516	0.0178631	0.0199505	0.017615	0.0123885		0.0586512	0.0601433	0.0578047	0.0451361
517	0.015908	0.0177651	0.0156855	0.0110351		0.0522236	0.0535436	0.0514632	0.0402007
518	0.0167519	0.0187069	0.0165182	0.0116194		0.0549926	0.0563843	0.0542036	0.0423385
519	0.0175956	0.0196491	0.0173513	0.0122026		0.057776	0.0592394	0.0569439	0.0444618
520	0.0182726	0.0204051	0.0180183	0.0126716		0.0599998	0.0615206	0.059139	0.0461835
521	0.0184921	0.0206498	0.0182347	0.0128259		0.0607172	0.0622667	0.059842	0.046743
522	0.0185539	0.0207174	0.0182952	0.0128668		0.0609324	0.0624675	0.0600572	0.0469008
523	0.0182629	0.0203924	0.0180092	0.0126658		0.0599855	0.0614919	0.0591103	0.0461691
524	0.018948	0.0211576	0.0186844	0.013135		0.0622667	0.0638305	0.0613628	0.0479051
525	0.0191938	0.0214324	0.0189272	0.0132975		0.0631131	0.06472	0.0622093	0.0485364
526	0.0183952	0.0205396	0.0181397	0.0127459		0.0604876	0.0620227	0.0596124	0.0465278
527	0.0173733	0.0193995	0.0171322	0.0120348		0.0571591	0.0586081	0.0563269	0.0439453
528	0.0184311	0.0205789	0.0181745	0.0127667		0.0606454	0.0621806	0.0597702	0.0466426
529	0.0194679	0.0217358	0.0191982	0.0134815		0.0640744	0.0656956	0.0631562	0.0492681
530	0.019235	0.021476	0.0189684	0.0133189		0.063314	0.0649209	0.0624101	0.0486799
531	0.0195706	0.021848	0.019299	0.0135515		0.0644331	0.0660543	0.0635005	0.0495407
532	0.0189416	0.0211453	0.0186788	0.0131163		0.0623527	0.0639309	0.0614632	0.0479482
533	0.0184274	0.0205701	0.0181708	0.0127614		0.0606598	0.0621949	0.0597846	0.0466426
534	0.0190173	0.0212283	0.0187537	0.0131727		0.0625823	0.0641605	0.0616784	0.0481347
535	0.0194706	0.0217301	0.0191996	0.0134914		0.0640457	0.0656526	0.0631275	0.0492825
536	0.0196799	0.0219658	0.0194069	0.0136389		0.0647344	0.0663556	0.0638018	0.0498133
537	0.0189403	0.0211372	0.0186762	0.0131294		0.062281	0.0638305	0.0613771	0.0479338
538	0.0192987	0.0215365	0.0190301	0.0133766		0.0634575	0.0650357	0.0625392	0.0488377
539	0.0191691	0.0213924	0.0189018	0.0132871		0.0630271	0.0646052	0.0621232	0.0485221
540	0.0183936	0.0205275	0.018137	0.0127458		0.060502	0.0620227	0.0596268	0.0465565
541	0.0184817	0.0206315	0.0182257	0.0127885		0.0608893	0.0624388	0.0600141	0.0468004
542	0.0190878	0.0213067	0.0188231	0.0132031		0.0629123	0.0645192	0.0620084	0.0483356
543	0.0190078	0.0212126	0.0187442	0.0131682		0.0625536	0.0641174	0.0616497	0.0481347
544	0.0193219	0.021565	0.0190535	0.0133708		0.0636583	0.0652652	0.0627401	0.0489381
545	0.0193199	0.0215591	0.0190515	0.013374		0.0636296	0.0652365	0.0627114	0.0489238
546	0.0193721	0.0216235	0.0191038	0.0133938		0.0638879	0.0655091	0.0629697	0.0490673
547	0.0194608	0.021716	0.0191899	0.0134704		0.0641031	0.0657243	0.0631849	0.0492968
548	0.0192856	0.0215196	0.0190177	0.0133557		0.0635005	0.065093	0.0625823	0.0488377
549	0.0194033	0.0216478	0.0191337	0.0134435		0.0638592	0.0654517	0.062941	0.049139
550	0.0196934	0.021969	0.0194193	0.0136483		0.0647918	0.0663986	0.0638592	0.0498707
551	0.0195128	0.021766	0.0192406	0.0135278		0.0641748	0.0657674	0.0632423	0.0494116
552	0.0196962	0.0219695	0.019422	0.0136572		0.0647631	0.0663699	0.0638305	0.0498851
553	0.0193778	0.0216146	0.019108	0.0134352		0.0637301	0.0653082	0.0628118	0.0490816
554	0.0198881	0.0221816	0.019612	0.0137897		0.0654087	0.0670156	0.0644618	0.0503729
555	0.0199699	0.0222731	0.019692	0.0138461		0.0656813	0.0673025	0.0647344	0.0505881
556	0.0197511	0.0220282	0.0194763	0.0136936		0.0649639	0.0665708	0.0640314	0.0500285
557	0.0191774	0.0213874	0.0189101	0.0132943		0.0630844	0.0646483	0.0621806	0.0485795
558	0.019073	0.0212709	0.0188076	0.0132182		0.0627688	0.0643183	0.0618649	0.0483212
559	0.018761	0.0209238	0.0185006	0.013001		0.0617645	0.0632853	0.060875	0.0475465
560	0.0190449	0.0212376	0.0187796	0.0131968		0.0627114	0.0642466	0.0617932	0.0482638
561	0.0193429	0.0215695	0.0190727	0.0134004		0.0637014	0.0652652	0.0627831	0.0490242
562	0.0192488	0.0214639	0.018981	0.0133333		0.0634144	0.0649783	0.0624962	0.048809
563	0.0198184	0.0221006	0.0195425	0.0137232		0.0653226	0.0669295	0.0643757	0.0502581
564	0.019316	0.0215404	0.0190476	0.0133712		0.063687	0.0652652	0.0627688	0.0489955
565	0.0191972	0.0214068	0.0189307	0.0132857		0.063314	0.0648778	0.0623958	0.0486942
566	0.0189676	0.0211503	0.0187048	0.0131259		0.0625679	0.0641174	0.0616641	0.0481204
567	0.0193601	0.0215891	0.0190912	0.013391		0.0639022	0.0654804	0.0629697	0.0491247
568	0.0191438	0.0213545	0.0188764	0.0132131		0.0633283	0.0649209	0.0624101	0.0485938
569	0.01851	0.0206648	0.0182522	0.0127153		0.0615349	0.0631418	0.0606454	0.0470156
570	0.0186653	0.02083	0.0184056	0.0128442		0.0619367	0.0635292	0.0610471	0.047403
571	0.0187422	0.0209066	0.0184828	0.0129303		0.0620371	0.0636009	0.0611476	0.0475895
572	0.0191295	0.0213478	0.0188635	0.0131615		0.0635005	0.0651361	0.0625823	0.0485938
573	0.0194116	0.0216613	0.0191413	0.0133571		0.0644187	0.066083	0.0635005	0.0492968
574	0.0194195	0.0216679	0.0191497	0.0133628		0.0644474	0.0660973	0.0635149	0.0493255
575	0.0190924	0.0213075	0.0188282	0.0131315		0.0634001	0.0650357	0.0624819	0.0484934
576	0.0189828	0.0211832	0.0187186	0.01306		0.0630127	0.0646196	0.0620945	0.0482208
577	0.0192331	0.0214611	0.018967	0.0132373		0.0638161	0.0654517	0.0628979	0.0488521
578	0.0190216	0.0212208	0.0187579	0.0131065		0.0630271	0.0646339	0.0621232	0.0482925
579	0.0191367	0.0213447	0.0188704	0.0132014		0.0633283	0.0649209	0.0624101	0.0485795
580	0.0195068	0.0217518	0.0192342	0.0134753		0.0644474	0.0660543	0.0635149	0.0494977
581	0.0196299	0.0218863	0.0193577	0.0135767		0.0647774	0.0663843	0.0638448	0.049799
582	0.0200173	0.0223133	0.0197388	0.0138554		0.0659826	0.0676038	0.0650357	0.0507746
583	0.0200894	0.0223928	0.019812	0.0139181		0.0661691	0.0677903	0.0652078	0.0509467
584	0.0202692	0.0225918	0.0199868	0.0140456		0.0667286	0.0683642	0.0657674	0.0513915
585	0.0197861	0.0220512	0.0195101	0.0137122		0.0651361	0.0667143	0.0641892	0.0501577
586	0.0193529	0.0215724	0.0190838	0.0134036		0.0637444	0.0653082	0.0628262	0.0490673
587	0.0196804	0.0219452	0.0194064	0.013599		0.0649783	0.0665995	0.0640314	0.0499138
588	0.0187866	0.0209793	0.0185274	0.0128773		0.0625536	0.0642179	0.0616641	0.0477043
589	0.0161181	0.0180439	0.0158945	0.0109229		0.0543183	0.0558965	0.0535292	0.0409468
590	0.0168873	0.0189	0.0166524	0.0114447		0.0569008	0.0585507	0.056083	0.042898
591	0.0181833	0.0203288	0.0179308	0.0123882		0.0609324	0.0626397	0.0600572	0.0461978
592	0.017876	0.0199938	0.0176285	0.0121586		0.0600141	0.0617071	0.0591533	0.0454087
593	0.0184881	0.0206533	0.0182316	0.0126508		0.0616928	0.063357	0.0608032	0.0469439
594	0.018347	0.0204982	0.0180917	0.0125406		0.061291	0.0629553	0.0604015	0.0465709
595	0.0177127	0.0198103	0.017467	0.0120474		0.0594977	0.0611763	0.0586368	0.045007
596	0.0189319	0.0211317	0.0186696	0.0129922		0.062984	0.0646339	0.0620801	0.0480773
597	0.0187289	0.0209108	0.0184686	0.0128433		0.0623814	0.0640314	0.0614776	0.0475752
598	0.018837	0.021018	0.0185753	0.0129432		0.0625966	0.0642179	0.0616928	0.0478478
599	0.0189994	0.0211912	0.018735	0.0130792		0.0630127	0.0646196	0.0621088	0.0482495
600	0.0192414	0.0214461	0.0189731	0.0132888		0.0636009	0.0651791	0.0626827	0.0488521
601	0.0192563	0.0214532	0.0189873	0.0133325		0.0634862	0.0650213	0.0625679	0.0488664
602	0.0191908	0.0213785	0.0189223	0.0132963		0.0632279	0.0647487	0.0623097	0.0486942
603	0.0195738	0.0218044	0.019302	0.0135744		0.0644331	0.0659826	0.0635005	0.0496698
604	0.0199411	0.0222111	0.0196625	0.013831		0.0656239	0.0671877	0.0646626	0.0505881
605	0.0198904	0.022153	0.0196124	0.0138042		0.0654087	0.0669725	0.0644618	0.0504589
606	0.0198568	0.0221145	0.0195806	0.0137899		0.0652509	0.0668004	0.0643039	0.0503585
607	0.0201	0.0223827	0.0198199	0.0139674		0.0659969	0.0675608	0.0650357	0.0509611
608	0.0199155	0.0221743	0.0196379	0.0138458		0.0653369	0.0668864	0.0644044	0.0504733
609	0.0199808	0.022248	0.0197018	0.0138959		0.0655235	0.0670729	0.0645765	0.0506311
610	0.0198462	0.0220976	0.0195686	0.0138048		0.0650643	0.0665995	0.0641174	0.0502868
611	0.0199819	0.022249	0.0197047	0.0139035		0.0654804	0.0670299	0.0645335	0.0506168
612	0.019937	0.0221974	0.0196575	0.0138711		0.0653226	0.0668577	0.0643757	0.050502
613	0.0197072	0.0219433	0.0194325	0.0137126		0.0645622	0.066083	0.0636296	0.0499138
614	0.0194623	0.0216706	0.0191926	0.0135471		0.0637301	0.0652365	0.0628118	0.0492825
615	0.0199181	0.022178	0.0196414	0.0138702		0.0651791	0.0667143	0.0642466	0.0504159
616	0.0192869	0.0214735	0.0190178	0.0134327		0.0630988	0.0645765	0.0621806	0.048809
617	0.0192697	0.021455	0.0190005	0.013423		0.0630271	0.0645048	0.0621088	0.048766
618	0.0200341	0.0223057	0.0197544	0.0139561		0.0655091	0.0670443	0.0645622	0.0506885
619	0.0198578	0.0221104	0.019581	0.0138338		0.0649209	0.066456	0.0639883	0.0502437
620	0.0199933	0.022263	0.0197152	0.013925		0.06538	0.0669295	0.0644331	0.0505881
621	0.0200156	0.0222896	0.0197365	0.0139286		0.0655091	0.0670586	0.0645622	0.0506455
622	0.0196643	0.0219071	0.0193903	0.013654		0.0645048	0.0660686	0.0635722	0.0497703
623	0.0192517	0.0214552	0.0189835	0.0133383		0.0632853	0.0648491	0.0623814	0.0487373
624	0.0190161	0.0211885	0.018751	0.0131898		0.0624388	0.0639596	0.0615349	0.0481347
625	0.0191214	0.0213027	0.0188561	0.0132822		0.0626827	0.0642035	0.0617788	0.0483786
626	0.019436	0.0216528	0.0191657	0.0134986		0.0637157	0.0652652	0.0627975	0.049182
627	0.0195962	0.0218377	0.019323	0.0135791		0.06439	0.0659682	0.0634575	0.0495981
628	0.0184524	0.0206096	0.018197	0.0126128		0.0614919	0.0631705	0.0606024	0.0468004
629	0.0192322	0.0214508	0.0189661	0.0132657		0.0634862	0.0651217	0.0625823	0.0487086
630	0.0189534	0.0211362	0.0186899	0.013087		0.0624962	0.0640887	0.0615923	0.0479912
631	0.0194198	0.0216378	0.019149	0.0134748		0.063687	0.0652509	0.0627688	0.0491247
632	0.0190616	0.0212416	0.018797	0.0132131		0.0625823	0.0641174	0.0616784	0.0482208
633	0.0197533	0.0220046	0.0194784	0.013733		0.0646483	0.0662121	0.0637157	0.0499424
634	0.0196355	0.0218658	0.0193617	0.013679		0.0641174	0.0656382	0.0631849	0.0496125
635	0.0199398	0.022205	0.0196616	0.0138962		0.0650787	0.0666282	0.0641318	0.0503729
636	0.0196981	0.0219317	0.0194236	0.0137375		0.0642322	0.065753	0.0632996	0.0497559
637	0.0200193	0.0222896	0.0197409	0.0139657		0.0652509	0.0668004	0.0643183	0.0505594
638	0.0202806	0.0225757	0.0199972	0.0141687		0.0659969	0.0675321	0.06505	0.0511906
639	0.0200817	0.0223527	0.019802	0.0140358		0.0653082	0.066829	0.0643613	0.0506742
640	0.0199287	0.0221813	0.0196502	0.0139398		0.0647487	0.0662552	0.0638161	0.0502868
641	0.019937	0.02219	0.019659	0.0139496		0.0647487	0.0662552	0.0638161	0.0502868
642	0.0198849	0.02213	0.0196074	0.013923		0.0645335	0.0660256	0.0636009	0.0501577
643	0.0201278	0.0224032	0.0198472	0.0140833		0.0653656	0.0668721	0.0644187	0.0507602
644	0.0201026	0.022375	0.0198233	0.0140751		0.0652365	0.066743	0.0642896	0.0506885
645	0.0200793	0.0223511	0.0197988	0.0140388		0.0652509	0.0667717	0.0643039	0.0506455
646	0.0193546	0.0215621	0.0190845	0.0134632		0.0632279	0.0647631	0.0623097	0.0488521
647	0.0187743	0.0209445	0.0185122	0.0129681		0.0618075	0.0634001	0.0609037	0.0474317
648	0.0186774	0.0208436	0.0184166	0.0128748		0.0616067	0.0632279	0.0607172	0.0471878
649	0.0183923	0.0205227	0.0181371	0.0126889		0.0606167	0.0621949	0.0597416	0.0464561
650	0.0189882	0.0211531	0.0187229	0.0132235		0.0619367	0.0634431	0.0610471	0.0478908
651	0.019908	0.0221722	0.0196313	0.0138833		0.0648348	0.0663986	0.0639022	0.0502007
652	0.0184121	0.0205514	0.0181563	0.0126786		0.0607745	0.0623814	0.0598994	0.0464991
653	0.0196722	0.0219107	0.0193974	0.0137195		0.06406	0.0655952	0.0631275	0.0495981
654	0.0195039	0.0217214	0.0192322	0.0136052		0.0634862	0.065007	0.0625679	0.0491677
655	0.0185483	0.020675	0.01829	0.0128876		0.0606311	0.0621519	0.0597559	0.0467574
656	0.0165486	0.0184366	0.0163183	0.0115154		0.0540027	0.0553226	0.0532279	0.0417359
657	0.0169807	0.01892	0.0167436	0.0118164		0.0554087	0.0567717	0.0546053	0.0428263
658	0.0192236	0.021407	0.0189554	0.0134249		0.0624962	0.063974	0.0615923	0.048436
659	0.0194078	0.0216111	0.0191383	0.0135596		0.0630557	0.0645478	0.0621519	0.0488951
660	0.0194465	0.0216554	0.0191753	0.0135774		0.0632136	0.06472	0.0623097	0.0490099
661	0.0195625	0.021787	0.0192894	0.0136492		0.0636296	0.0651504	0.0627114	0.0492968
662	0.0195752	0.0218064	0.019303	0.0136357		0.0637874	0.0653369	0.0628692	0.0493542
663	0.0192864	0.0214802	0.019016	0.0134504		0.0627545	0.0642609	0.0618506	0.0486082
664	0.0197067	0.0219397	0.0194327	0.0137916		0.0638879	0.0653943	0.0629697	0.0496268
665	0.0198403	0.0220816	0.0195636	0.0139151		0.0641748	0.0656526	0.0632423	0.0499281
666	0.019982	0.0222328	0.0197033	0.0140373		0.0645192	0.0659826	0.0635866	0.0502724
667	0.0200478	0.022304	0.0197672	0.0140998		0.0646339	0.0660973	0.0637014	0.0504159
668	0.0201254	0.0223881	0.0198434	0.0141702		0.0648204	0.0662695	0.0638735	0.0505881
669	0.0204693	0.0227685	0.0201821	0.0144159		0.0658965	0.0673599	0.0649352	0.0514489
670	0.0204222	0.0227168	0.0201379	0.0143891		0.06571	0.0671877	0.0647631	0.0513198
671	0.0204478	0.0227444	0.0201617	0.0144105		0.0657674	0.0672451	0.0648204	0.0513772
672	0.0203021	0.0225827	0.0200191	0.0143097		0.0652939	0.066743	0.064347	0.0510041
673	0.0206372	0.0229539	0.0203481	0.0145497		0.0663412	0.067819	0.06538	0.0518506
674	0.0205894	0.0229015	0.0203028	0.0145193		0.0661834	0.0676468	0.0652222	0.0517215
675	0.0204305	0.0227249	0.020145	0.0144093		0.0656526	0.067116	0.0646913	0.0513198
676	0.0205973	0.0229088	0.0203088	0.0145277		0.0661691	0.0676325	0.0652078	0.0517215
677	0.0204149	0.0227074	0.02013	0.014402		0.0655808	0.0670299	0.0646196	0.0512624
678	0.0204933	0.0227928	0.020206	0.0144577		0.0658247	0.0672738	0.0648635	0.0514632
679	0.0201889	0.022454	0.0199058	0.0142439		0.0648348	0.0662695	0.0638879	0.0506885
680	0.0203785	0.0226664	0.0200936	0.0143797		0.0654374	0.0668864	0.0644761	0.051162
681	0.0202717	0.0225463	0.019988	0.014305		0.0650787	0.0665278	0.0641318	0.0508894
682	0.0202743	0.0225485	0.01999	0.0143051		0.065093	0.0665278	0.0641461	0.0508894
683	0.0202594	0.0225332	0.0199769	0.0142959		0.06505	0.0664847	0.0641031	0.0508607
684	0.0201737	0.0224382	0.0198919	0.0142312		0.0647774	0.0662265	0.0638448	0.0506455
685	0.0203939	0.0226808	0.0201071	0.0143931		0.0654517	0.0669008	0.0645048	0.0511906
686	0.0202865	0.0225637	0.0200021	0.0143099		0.0651361	0.0665851	0.0641892	0.0509181
687	0.014636	0.0164968	0.0144342	0.00953703		0.0509754	0.0528549	0.0502437	0.0371735
688	0.0166139	0.0186136	0.0163845	0.0111667		0.056083	0.057819	0.0552796	0.0420946
689	0.0166665	0.0186674	0.0164346	0.0112101		0.0562122	0.0579338	0.0553944	0.0422093
690	0.0173007	0.019344	0.0170608	0.0117509		0.0577473	0.0594259	0.0569295	0.0437588
691	0.0179336	0.0200188	0.0176842	0.0123017		0.0592537	0.0608606	0.0583929	0.0452653
692	0.0180923	0.0201853	0.0178394	0.0124631		0.059512	0.0610902	0.0586512	0.045624
693	0.0170646	0.0190812	0.0168276	0.011649		0.0567143	0.0583355	0.0558965	0.0430415
694	0.0165422	0.0185044	0.0163138	0.0112898		0.0549783	0.0565852	0.0541892	0.0416641
695	0.0176556	0.0197073	0.0174091	0.0121902		0.0579625	0.0595263	0.0571304	0.0444044
696	0.0177021	0.0197566	0.0174556	0.0122327		0.0580773	0.0596268	0.0572308	0.0445336
697	0.0195568	0.0217774	0.0192839	0.0136894		0.063271	0.0647774	0.0623527	0.049139
698	0.0192362	0.0214215	0.018967	0.0134545		0.062281	0.0637731	0.0613771	0.0483356
699	0.0182371	0.0203455	0.017984	0.012626		0.0596985	0.0612624	0.0588377	0.0458679
700	0.0179976	0.0200834	0.0177478	0.0124521		0.0589525	0.0605163	0.058106	0.0452653
701	0.0175568	0.0196128	0.017313	0.0120678		0.0579051	0.059512	0.057073	0.0442036
702	0.0179314	0.0200119	0.0176818	0.01238		0.058852	0.0604159	0.0580055	0.0451218
703	0.0180782	0.0201722	0.0178275	0.0125235		0.059139	0.0606885	0.0582781	0.0454374
704	0.0190381	0.0212203	0.0187726	0.013278		0.0618219	0.063357	0.0609324	0.0478047
705	0.0188685	0.0210381	0.0186043	0.0130932		0.061578	0.0631562	0.0606885	0.0474604
706	0.0190842	0.0212649	0.0188184	0.0132899		0.0620514	0.0636009	0.0611619	0.0479912
707	0.0191269	0.0213107	0.0188598	0.0133273		0.0621519	0.063687	0.0612624	0.0480917
708	0.0191951	0.0213859	0.0189257	0.013366		0.0624101	0.0639453	0.0615063	0.0482638
709	0.0195485	0.0217621	0.0192753	0.0136979		0.0631418	0.0646339	0.0622236	0.0490816
710	0.0193895	0.0215947	0.0191204	0.0135344		0.0628692	0.0644044	0.0619654	0.0487373
711	0.0195056	0.0217174	0.0192325	0.0136474		0.0630988	0.0645909	0.0621806	0.0489955
712	0.0196018	0.0218181	0.0193279	0.0137565		0.0632136	0.0646913	0.0622953	0.0492107
713	0.0193078	0.021496	0.0190379	0.0135085		0.0624532	0.0639309	0.0615493	0.0485077
714	0.0194341	0.021637	0.0191633	0.013612		0.0627975	0.0642896	0.0618936	0.0487947
715	0.0185044	0.0206221	0.0182456	0.012873		0.0602294	0.0617358	0.0593542	0.0465278
716	0.018398	0.0205106	0.0181412	0.0127716		0.0600141	0.0615349	0.059139	0.0462696
717	0.0140451	0.0157961	0.0138517	0.00930658		0.048063	0.0497846	0.0473743	0.0354231
718	0.0125192	0.0141217	0.0123484	0.00818493		0.0434288	0.0451218	0.0428119	0.0315494
719	0.0115068	0.0129771	0.0113495	0.00753859		0.039842	0.0413915	0.0392682	0.0289669
720	0.0118477	0.0133854	0.0116846	0.00768075		0.0414202	0.0431132	0.040832	0.0298708
721	0.0143051	0.0160489	0.014108	0.00959765		0.0483356	0.0499424	0.0476469	0.0360401
722	0.0176241	0.0196692	0.0173789	0.0121519		0.0578764	0.0594259	0.0570443	0.0443471
723	0.0157614	0.0176427	0.015542	0.0107023		0.0525967	0.0542036	0.0518363	0.0396699
724	0.0134759	0.0151432	0.0132914	0.00897612		0.0458679	0.0474747	0.0452222	0.0339454
725	0.0128642	0.0144922	0.0126877	0.00846267		0.0443327	0.045997	0.0437014	0.0324102
726	0.0137207	0.0154228	0.013532	0.00912084		0.0467861	0.048436	0.0461261	0.0345623
727	0.0143572	0.0161142	0.0141584	0.00961779		0.0485795	0.050215	0.0478908	0.0361548
728	0.0129684	0.0145857	0.0127887	0.00859514		0.0443614	0.0459539	0.0437301	0.0326685
729	0.0141779	0.0158928	0.0139818	0.00957123		0.0476182	0.049139	0.0469295	0.0356957
730	0.0147977	0.0166085	0.0145931	0.00991125		0.0500716	0.0517358	0.0493542	0.0372739
731	0.0140624	0.015789	0.0138687	0.00940175		0.0476756	0.0492968	0.0470013	0.0354375
732	0.0158583	0.0177418	0.0156374	0.0108072		0.0527114	0.0542896	0.051951	0.0398851
733	0.0174835	0.0195169	0.0172405	0.0120664		0.0573599	0.0588951	0.0565278	0.0439453
734	0.0181766	0.0202745	0.0179232	0.0126165		0.0592824	0.0608176	0.058436	0.0456526
735	0.0176834	0.0197348	0.0174359	0.0122381		0.0578621	0.0593972	0.0570299	0.0444331
736	0.0176178	0.0196637	0.0173723	0.0121591		0.057776	0.0593255	0.0569439	0.044304
737	0.0177303	0.0197894	0.0174835	0.0122533		0.0580916	0.0596411	0.0572595	0.0445766
738	0.0184477	0.020553	0.0181898	0.0128605		0.0598707	0.0613484	0.0589955	0.0463413
739	0.0181254	0.0201937	0.0178724	0.012649		0.0587659	0.060215	0.0579195	0.0455092
740	0.0188684	0.0210071	0.0186043	0.0132293		0.060875	0.0623097	0.0599855	0.0473313
741	0.0188423	0.0209691	0.0185775	0.0132451		0.0606167	0.0620227	0.0597416	0.0472452
742	0.0190501	0.0211919	0.018783	0.0134347		0.0610758	0.0624532	0.0602007	0.047733
743	0.0196171	0.0218225	0.019342	0.0138497		0.0628262	0.0642466	0.0619223	0.0491534
744	0.0196966	0.0219049	0.0194208	0.0139362		0.062941	0.0643326	0.0620371	0.0493255
745	0.0198207	0.0220384	0.0195427	0.0140514		0.0632136	0.0645909	0.0622953	0.0496125
746	0.0199355	0.0221674	0.0196576	0.0141318		0.0635866	0.0649783	0.0626684	0.0498994
747	0.0200354	0.0222743	0.0197533	0.0142085		0.0638735	0.0652509	0.062941	0.050129
748	0.0200325	0.022272	0.0197528	0.0142113		0.0638448	0.0652222	0.0629266	0.050129
749	0.0198378	0.0220544	0.0195599	0.0140752		0.0632136	0.0645765	0.0622953	0.0496412
750	0.0198542	0.0220733	0.0195757	0.0140878		0.0632566	0.0646339	0.0623384	0.0496698
751	0.0196776	0.0218782	0.0194015	0.0139632		0.0626971	0.0640457	0.0617932	0.0492394
752	0.0197939	0.0220047	0.0195165	0.0140458		0.0630557	0.0644187	0.0621375	0.049512
753	0.0199252	0.0221515	0.0196466	0.0141419		0.0634575	0.0648348	0.0625392	0.049842
754	0.0199915	0.0222255	0.0197117	0.0141883		0.0636727	0.06505	0.0627545	0.0500142
755	0.0199008	0.0221255	0.0196216	0.0141227		0.0634001	0.0647631	0.0624675	0.0497846
756	0.019931	0.0221586	0.0196524	0.0141475		0.0634718	0.0648348	0.0625536	0.0498564
757	0.0199888	0.0222219	0.0197066	0.014188		0.0636583	0.0650213	0.0627258	0.0499998
758	0.0197682	0.0219791	0.0194914	0.0140302		0.0629553	0.0643183	0.0620514	0.0494403
759	0.0194511	0.0216326	0.0191789	0.0137516		0.0621806	0.0635722	0.061291	0.0487086
760	0.00497713	0.00590582	0.00491311	0.00253894		0.0209755	0.022812	0.0207029	0.0121305
761	0.00315138	0.00382753	0.00311147	0.00143329		0.0142209	0.0158106	0.0140315	0.00735579
762	0.0113832	0.0129367	0.0112276	0.00711403		0.0411476	0.0429984	0.0405594	0.0289095
763	0.00679608	0.00793616	0.00670578	0.00373978		0.0272166	0.0291534	0.0268435	0.0169296
764	0.0092031	0.010582	0.00907908	0.00545397		0.0348349	0.0367861	0.0343471	0.0232711
765	0.0114348	0.0129988	0.0112797	0.00714414		0.0413628	0.043228	0.0407746	0.029053
766	0.0133193	0.0149958	0.013135	0.00869796		0.0461691	0.0478478	0.0455092	0.0338019
767	0.0161771	0.0180866	0.0159519	0.0109645		0.0540027	0.0555809	0.0532136	0.040875
768	0.018231	0.0203031	0.0179768	0.0127088		0.0591246	0.0605593	0.0582638	0.0458105
769	0.018543	0.0206362	0.0182832	0.0130116		0.0597272	0.0611189	0.0588664	0.0465135
770	0.0190942	0.0212352	0.0188256	0.0134983		0.0610471	0.0624101	0.0601576	0.0478047
771	0.0192281	0.0213795	0.0189583	0.0136384		0.0612767	0.0625966	0.0603872	0.048106
772	0.0192811	0.0214347	0.019011	0.0136908		0.0613771	0.0626971	0.0604876	0.0482208
773	0.019438	0.0216096	0.0191654	0.0138069		0.0618649	0.0631849	0.0609611	0.0486082
774	0.0193669	0.0215297	0.0190955	0.0137599		0.061621	0.062941	0.0607315	0.048436
775	0.019243	0.0213923	0.0189737	0.0136746		0.0612193	0.0625249	0.0603298	0.0481204
776	0.019502	0.0216807	0.0192288	0.0138613		0.0620371	0.063357	0.0611332	0.048766
777	0.0192716	0.0214239	0.0190007	0.0136968		0.061291	0.062611	0.0604015	0.0481921
778	0.0191764	0.0213175	0.018907	0.0136274		0.0610041	0.0623097	0.0601146	0.0479482
779	0.0192167	0.0213636	0.0189462	0.0136563		0.0611332	0.0624388	0.0602437	0.0480486
780	0.0191367	0.0212735	0.0188681	0.0136016		0.0608606	0.0621662	0.0599855	0.0478478
781	0.0191801	0.0213217	0.0189114	0.0136337		0.0610041	0.0623097	0.0601146	0.0479625
782	0.0193215	0.0214801	0.0190507	0.0137336		0.0614489	0.0627688	0.0605593	0.0483069
783	0.0190078	0.0211316	0.0187415	0.0135128		0.0604446	0.0617358	0.0595694	0.0475321
784	0.0191252	0.021261	0.0188563	0.0135971		0.0608032	0.0621088	0.0599281	0.0478191
785	0.0189455	0.0210631	0.0186802	0.0134543		0.0603011	0.0616067	0.0594259	0.0473743
786	0.0191267	0.0212663	0.0188583	0.0135678		0.0609467	0.0622667	0.0600572	0.0478478
787	0.0184918	0.0205812	0.0182335	0.0130276		0.0593685	0.0607315	0.0585077	0.046327
788	0.0181281	0.0201893	0.0178756	0.0127365		0.0583929	0.0597702	0.0575464	0.0454374
789	0.017996	0.0200434	0.017745	0.0125992		0.0581347	0.0595407	0.0572882	0.0451361
790	0.0172654	0.0192536	0.0170252	0.0120283		0.056083	0.0575177	0.0552796	0.0432997
791	0.0177405	0.019759	0.0174926	0.0124271		0.0572738	0.0586512	0.0564417	0.0444762
792	0.0177176	0.0197293	0.0174695	0.0124355		0.0570873	0.0584503	0.0562552	0.0443901
793	0.0174035	0.0193836	0.0171611	0.0122014		0.0561404	0.057489	0.055337	0.0436154
794	0.0182364	0.0202781	0.0179801	0.0129256		0.058149	0.0594116	0.0573025	0.0456096
795	0.0184121	0.0204836	0.0181541	0.0130093		0.0589094	0.0602437	0.0580629	0.0460974
796	0.0172813	0.0192605	0.0170406	0.0120585		0.0560256	0.0574317	0.0552222	0.0433428
797	0.0172543	0.0192406	0.0170144	0.0120297		0.0560543	0.0574747	0.0552509	0.0432997
798	0.0183353	0.0204017	0.0180788	0.0129176		0.0588233	0.060172	0.0579769	0.0459252
799	0.0181315	0.0201829	0.0178771	0.0127462		0.0583068	0.0596698	0.0574747	0.0454374
800	0.0176607	0.0196682	0.0174128	0.0123654		0.0570299	0.0583929	0.0561978	0.0442897

## Sheet: 20degS
20 degrees S latitude	Daily Irradiance (mE cm-2 d-1 nm-1)					Solar Noon Irradiance (mE cm-2 d-1 nm-1)
wavelength (nm)	March 20th	June 21st	September 22nd	December 22nd		March 20th	June 21st	September 22nd	December 22nd
280	7.40459e-18	2.07877e-20	4.16845e-19	1.02691e-17		1.03945e-16	1.0637e-19	6.09324e-18	1.34849e-16
281	2.30847e-16	7.6676e-19	1.67548e-17	3.1849e-16		3.11333e-15	4.08607e-18	2.35293e-16	4.01003e-15
282	9.46287e-15	4.29936e-17	7.6608e-16	1.08436e-14		1.1746e-13	2.81061e-16	1.02295e-14	1.29569e-13
283	6.07587e-14	2.9746e-16	6.19792e-15	7.14541e-14		7.32566e-13	2.17359e-15	7.79624e-14	8.07027e-13
284	7.06664e-13	4.00429e-15	8.61922e-14	8.04856e-13		8.21088e-12	3.17216e-14	1.03386e-12	8.63986e-12
285	2.09361e-12	1.24844e-14	2.80877e-13	2.34307e-12		2.42323e-11	1.02855e-13	3.26685e-12	2.44906e-11
286	2.11162e-11	1.64932e-13	5.05353e-12	4.75703e-11		2.28981e-10	1.44045e-12	5.84933e-11	5.34145e-10
287	1.43824e-10	1.54393e-12	3.08259e-11	1.75493e-10		1.49354e-09	1.3835e-11	3.33141e-10	1.67144e-09
288	8.51528e-10	1.3797e-11	2.19322e-10	1.0161e-09		8.31131e-09	1.25236e-10	2.22668e-09	9.04014e-09
289	5.29737e-09	1.11935e-10	1.52225e-09	6.24141e-09		4.95694e-08	1.01965e-09	1.48206e-08	5.31419e-08
290	2.77731e-08	7.97255e-10	9.77724e-09	3.31312e-08		2.49067e-07	6.98563e-09	9.0674e-08	2.6614e-07
291	7.88154e-08	3.14275e-09	2.96564e-08	9.47645e-08		6.77903e-07	2.6614e-08	2.64705e-07	7.35579e-07
292	2.85286e-07	1.76008e-08	1.2179e-07	3.44992e-07		2.30559e-06	1.41578e-07	1.02223e-06	2.54949e-06
293	5.97306e-07	5.11048e-08	2.74425e-07	7.29539e-07		4.60974e-06	3.94977e-07	2.20516e-06	5.26397e-06
294	1.16407e-06	1.42983e-07	7.04144e-07	1.44508e-06		8.43182e-06	1.04677e-06	5.27545e-06	9.98418e-06
295	2.71371e-06	3.22912e-07	1.48837e-06	3.31297e-06		1.90243e-05	2.63701e-06	1.0769e-05	2.16499e-05
296	7.72112e-06	1.11477e-06	4.56114e-06	9.40161e-06		5.15493e-05	8.73455e-06	3.13772e-05	5.83786e-05
297	9.95508e-06	1.65918e-06	6.18804e-06	1.20869e-05		6.3974e-05	1.25509e-05	4.09324e-05	7.21375e-05
298	2.59243e-05	5.10564e-06	1.70655e-05	3.14211e-05		0.00015911	3.67861e-05	0.000107733	0.000178909
299	4.34323e-05	9.65905e-06	2.96276e-05	5.24819e-05		0.000257388	6.67286e-05	0.000180631	0.000288808
300	5.338e-05	1.38525e-05	3.84303e-05	6.50768e-05		0.000302008	8.96123e-05	0.000223672	0.00034261
301	9.54456e-05	2.69814e-05	7.40502e-05	0.000118342		0.000521663	0.00016987	0.000413628	0.000598994
302	9.48537e-05	2.86456e-05	7.48272e-05	0.000116596		0.00050502	0.000175896	0.000407172	0.00057446
303	0.000256481	8.58858e-05	0.000207796	0.000314369		0.0013086	0.000503298	0.00108421	0.00148493
304	0.000260626	9.16013e-05	0.000214314	0.000319084		0.00130215	0.000524102	0.00109454	0.00147632
305	0.000427931	0.000165285	0.000361529	0.00052225		0.0020459	0.000899423	0.00176613	0.0023142
306	0.000405575	0.000164072	0.00034693	0.000494164		0.00189526	0.000869151	0.00165566	0.0021406
307	0.000638829	0.000276751	0.000523678	0.000781913		0.00286943	0.00141492	0.00241463	0.00323959
308	0.000750322	0.000335387	0.000673077	0.000917462		0.00330989	0.00168149	0.0030086	0.00373169
309	0.0007072	0.00032341	0.000638864	0.000864353		0.00307746	0.00159684	0.00281635	0.00346914
310	0.000704543	0.000337256	0.000645143	0.000859714		0.0029799	0.00161405	0.00276326	0.00335293
311	0.0013461	0.000656632	0.00123943	0.00164137		0.00562408	0.00310042	0.00524102	0.00632423
312	0.00118581	0.000596549	0.00110118	0.00144372		0.00485077	0.00275178	0.00455666	0.00544761
313	0.00144154	0.000743888	0.00134808	0.00175324		0.00579338	0.00336441	0.00547631	0.00649783
314	0.00169717	0.000887055	0.00159227	0.00206231		0.00675751	0.00397129	0.006406	0.00757243
315	0.00179888	0.00096969	0.00170155	0.00218259		0.00699711	0.00422811	0.00668147	0.00783068
316	0.00128588	0.000699606	0.00121911	0.00155956		0.00496555	0.00302725	0.00475178	0.00556239
317	0.00217613	0.00120546	0.00207286	0.00264021		0.00828405	0.00513198	0.00795837	0.00931848
318	0.00173308	0.000967201	0.00165366	0.00210308		0.00656239	0.00408894	0.00630701	0.00738448
319	0.00232072	0.0013377	0.00223207	0.00281243		0.00858247	0.00546627	0.00830126	0.00963411
320	0.00243395	0.00137763	0.00232992	0.00295316		0.0091334	0.00574747	0.00879194	0.010264
321	0.00244761	0.00143617	0.00232246	0.00290782		0.00888232	0.00577903	0.00847343	0.00976754
322	0.00260438	0.0015075	0.00250726	0.0031547		0.00959681	0.00613771	0.00928978	0.0107632
323	0.00216263	0.00126981	0.00209021	0.00261902		0.00787228	0.00508607	0.0076456	0.0088192
324	0.00293455	0.00175441	0.00285816	0.00355053		0.0104792	0.00692968	0.0102338	0.0116599
325	0.0027685	0.00162615	0.00262731	0.00328864		0.0100387	0.00654517	0.0095796	0.0110358
326	0.00403855	0.00242098	0.00393611	0.00488521		0.0143902	0.00953942	0.0140588	0.0159971
327	0.00398327	0.00240238	0.00388854	0.00481851		0.0141133	0.00940599	0.0138106	0.0156958
328	0.00358739	0.00213104	0.00348553	0.00433783		0.0128809	0.00848491	0.0125538	0.0143242
329	0.00422435	0.00257308	0.00413433	0.00510925		0.014835	0.0099684	0.014548	0.0164849
330	0.00483894	0.00295076	0.0047363	0.00585229		0.0169727	0.0114203	0.0166427	0.0188665
331	0.00407376	0.00245776	0.00397553	0.00492574		0.0144332	0.00962981	0.0141147	0.0160401
332	0.00431001	0.00264131	0.00422362	0.00521081		0.0150502	0.0101721	0.0147776	0.0167144
333	0.00423915	0.002603	0.00415563	0.00512548		0.0147776	0.0100028	0.014505	0.0164131
334	0.00401928	0.00245019	0.00393237	0.00485853		0.0141047	0.00949782	0.0138264	0.0156671
335	0.00440929	0.00271711	0.00434834	0.00534612		0.0153228	0.0104074	0.0151219	0.0170444
336	0.00341548	0.0021059	0.00336419	0.0041378		0.0118637	0.0080588	0.0116915	0.0131879
337	0.00335014	0.00205816	0.00328321	0.00404831		0.0116728	0.00791246	0.0114562	0.0129526
338	0.00419382	0.00258808	0.00395245	0.00508226		0.014548	0.00990528	0.0137202	0.0161836
339	0.00457389	0.00282299	0.004501	0.00553764		0.015868	0.0107934	0.0156241	0.0176327
340	0.00541616	0.00334452	0.00533961	0.00656101		0.0187804	0.0127948	0.0185222	0.0208751
341	0.00456604	0.00282125	0.00449433	0.00552716		0.0158249	0.0107805	0.0155954	0.0175753
342	0.00502026	0.00310327	0.00493756	0.00607341		0.0173888	0.0118464	0.0171162	0.0193113
343	0.00518724	0.00320865	0.0051029	0.00627511		0.0179626	0.0122467	0.0176757	0.0199425
344	0.00374193	0.0023142	0.00368688	0.00452989		0.0129569	0.00884215	0.0127718	0.0143902
345	0.00484261	0.0029978	0.00476338	0.00585683		0.0167575	0.0114347	0.0164849	0.0185939
346	0.00420925	0.00260783	0.00413918	0.00508876		0.014548	0.00993971	0.0143185	0.0161405
347	0.00512612	0.00317682	0.00504172	0.00619605		0.0177187	0.0121061	0.0174318	0.0196413
348	0.00473417	0.00293533	0.00465476	0.00572171		0.0163558	0.0111807	0.0160832	0.0181348
349	0.0043991	0.00272961	0.00432481	0.00531572		0.0151793	0.0103888	0.0149354	0.0168292
350	0.00540498	0.00335581	0.00531294	0.00653041		0.0186513	0.0127675	0.0183357	0.0206599
351	0.00509742	0.00316482	0.00501096	0.00615832		0.0175753	0.0120416	0.0172883	0.0194834
352	0.00533823	0.00331572	0.00524792	0.00644779		0.0184074	0.012614	0.0181061	0.0203873
353	0.00525773	0.0032686	0.00516885	0.00634969		0.0181061	0.0124246	0.0178192	0.0200717
354	0.00582664	0.00362146	0.00572705	0.0070365		0.0200717	0.0137647	0.0197417	0.0222381
355	0.00591048	0.00367569	0.00581106	0.00713759		0.0203586	0.013967	0.0200286	0.0225537
356	0.00561447	0.00349467	0.00551849	0.00677789		0.0193113	0.0132697	0.0189956	0.0213916
357	0.00396534	0.00246797	0.00389807	0.00478734		0.0136427	0.00937156	0.0134189	0.0151076
358	0.00385949	0.0024031	0.00379391	0.00465831		0.0132726	0.00912192	0.0130545	0.0146915
359	0.00463138	0.00288484	0.0045523	0.00558946		0.0159253	0.0109469	0.0156527	0.0176183
360	0.00627444	0.00390932	0.00616778	0.00757267		0.0215638	0.014835	0.0212051	0.0238737
361	0.00457628	0.00285204	0.00449835	0.00552215		0.0157245	0.0108178	0.0154662	0.0174031
362	0.00456667	0.00284906	0.00448874	0.00550912		0.0156671	0.0107977	0.0154088	0.0173457
363	0.00568598	0.00354961	0.00558878	0.006858		0.0194978	0.0134447	0.0191821	0.0215781
364	0.00641986	0.00400958	0.00630971	0.00774047		0.0219942	0.0151793	0.0216355	0.0243328
365	0.0055925	0.00349377	0.00549757	0.00674394		0.0191678	0.0132252	0.0188522	0.0211907
366	0.00745545	0.00466148	0.0073295	0.00898999		0.0255379	0.0176327	0.0251075	0.0282352
367	0.00683795	0.0042766	0.00672289	0.00824537		0.0234002	0.0161692	0.0230272	0.0258823
368	0.00621405	0.00388797	0.00610929	0.0074919		0.0212625	0.0147058	0.0209182	0.023515
369	0.00679745	0.00425461	0.00668066	0.00819121		0.0232424	0.0160832	0.022855	0.0256958
370	0.00775002	0.00485351	0.0076178	0.0093403		0.0264848	0.0183357	0.0260544	0.0292825
371	0.00644878	0.00404176	0.00633954	0.00777144		0.0220229	0.0152654	0.0216642	0.0243471
372	0.00536022	0.00335925	0.005269	0.00645789		0.018307	0.0126814	0.0180057	0.0202295
373	0.00655826	0.0041139	0.006448	0.00790164		0.0223816	0.0155236	0.0220229	0.0247345
374	0.00621807	0.00390207	0.00611323	0.00749035		0.0212051	0.0147202	0.0208608	0.0234289
375	0.00502057	0.00315144	0.0049349	0.00604648		0.0171162	0.0118809	0.0168292	0.0189095
376	0.00621955	0.00390444	0.00611459	0.00749029		0.0212051	0.0147202	0.0208608	0.0234146
377	0.00684586	0.00429956	0.00672987	0.00824399		0.0233285	0.0161979	0.0229411	0.0257675
378	0.00871487	0.00547727	0.00856803	0.0104942		0.0296843	0.0206312	0.0291965	0.0327832
379	0.00681641	0.00428269	0.0067012	0.00820669		0.0232137	0.0161262	0.0228263	0.025624
380	0.00648182	0.00407293	0.00637161	0.00780413		0.0220659	0.0153371	0.0217072	0.0243758
381	0.00789211	0.00496301	0.00775785	0.00950116		0.0268579	0.01868	0.0264131	0.0296556
382	0.00557061	0.00350576	0.00547661	0.00670568		0.0189382	0.0131879	0.018637	0.0209182
383	0.0044096	0.00277672	0.00433464	0.00530645		0.0149784	0.010439	0.0147345	0.0165423
384	0.00469267	0.00295554	0.00461259	0.00564658		0.0159397	0.0111076	0.0156814	0.0175896
385	0.00686084	0.00432302	0.00674472	0.00825613		0.0232998	0.016241	0.0229124	0.0257101
386	0.00549229	0.00346282	0.00539877	0.00660621		0.018637	0.0130014	0.0183213	0.0205595
387	0.00601304	0.0037931	0.00591084	0.00723282		0.0203873	0.0142352	0.0200573	0.0224963
388	0.00625155	0.00394546	0.00614561	0.00751899		0.0211907	0.0148063	0.0208464	0.0233715
389	0.00668839	0.0042228	0.0065745	0.0080429		0.0226685	0.0158393	0.0222955	0.0249927
390	0.00815335	0.00514872	0.00801451	0.00980401		0.0276183	0.0192969	0.0271592	0.030459
391	0.00885745	0.00559688	0.00870799	0.0106509		0.0299856	0.0209755	0.0294977	0.0330702
392	0.00762231	0.00481713	0.00749287	0.0091658		0.0257962	0.0180487	0.0253801	0.0284504
393	0.00381252	0.00241109	0.00374791	0.00458323		0.0128938	0.00902723	0.0126829	0.0142152
394	0.00565604	0.00357847	0.00556016	0.00679882		0.0191248	0.0133916	0.0188091	0.021076
395	0.00879397	0.00556472	0.00864397	0.0105701		0.029713	0.0208177	0.0292252	0.0327546
396	0.00775762	0.00491064	0.00762653	0.00932487		0.0262123	0.0183644	0.0257818	0.0288952
397	0.00341734	0.00216493	0.00335948	0.00410634		0.0115365	0.0080918	0.0113472	0.012713
398	0.00974316	0.00617149	0.00957748	0.0117087		0.032898	0.0230702	0.0323528	0.0362409
399	0.0109428	0.00693709	0.0107579	0.0131485		0.0369152	0.025911	0.0363126	0.0406742
400	0.0113388	0.00718846	0.0111475	0.0136244		0.0382495	0.0268435	0.0376326	0.0421519
401	0.0116667	0.0073913	0.011469	0.0140161		0.0393829	0.0276326	0.0387373	0.0433858
402	0.0123555	0.00783373	0.0121462	0.0148418		0.0416785	0.0292682	0.0409898	0.0459109
403	0.0117772	0.00747086	0.0115775	0.0141458		0.0396986	0.0278909	0.0390386	0.0437301
404	0.0116138	0.00736894	0.0114166	0.0139482		0.039139	0.0275035	0.0384934	0.0431132
405	0.0116321	0.00738233	0.0114344	0.0139697		0.0391964	0.0275465	0.0385508	0.0431706
406	0.0114864	0.00729391	0.0112905	0.0137917		0.0386656	0.0272022	0.0380343	0.0425824
407	0.0113437	0.00720873	0.011151	0.0136193		0.0381634	0.0268722	0.0375322	0.0420228
408	0.0117897	0.00749077	0.0115894	0.0141543		0.0396699	0.0279196	0.0390243	0.0436871
409	0.0126453	0.00803542	0.0124307	0.0151804		0.0425393	0.0299425	0.0418363	0.0468291
410	0.0110747	0.0070417	0.0108876	0.0132945		0.0372309	0.0262266	0.0366283	0.0409898
411	0.0120303	0.00765188	0.011826	0.0144386		0.0404303	0.0284934	0.0397703	0.0445049
412	0.0129662	0.0082529	0.0127464	0.0155603		0.0435436	0.0307029	0.0428263	0.0479195
413	0.0126421	0.00804547	0.0124287	0.0151724		0.0424676	0.0299425	0.0417646	0.046743
414	0.0128394	0.00817531	0.0126222	0.0154072		0.0430989	0.0304016	0.0423958	0.0474317
415	0.0129149	0.00822702	0.012695	0.0154939		0.0433284	0.0305881	0.042611	0.0476756
416	0.013193	0.00841156	0.0129698	0.0158269		0.0442179	0.0312481	0.0435006	0.0486512
417	0.0128951	0.00822283	0.012677	0.0154687		0.0432136	0.0305307	0.0425106	0.0475465
418	0.0126806	0.00808827	0.0124651	0.0152104		0.0424819	0.0300286	0.0417933	0.046743
419	0.0128749	0.00821422	0.0126562	0.0154417		0.0431275	0.0304877	0.0424102	0.0474317
420	0.0128434	0.00819587	0.0126253	0.0154039		0.0430128	0.030416	0.0423098	0.0473026
421	0.0134711	0.00859915	0.0132432	0.0161551		0.0450931	0.0318937	0.0443471	0.0495981
422	0.0128321	0.0081942	0.0126134	0.0153883		0.042941	0.0303873	0.042238	0.0472308
423	0.0125692	0.00802687	0.0123555	0.0150714		0.0420515	0.029756	0.0413485	0.0462409
424	0.0133192	0.00850792	0.0130933	0.0159712		0.0445479	0.031535	0.0438162	0.0489955
425	0.0133411	0.00852705	0.0131145	0.015994		0.044591	0.0315924	0.0438593	0.0490386
426	0.0130471	0.00834562	0.012826	0.0156392		0.0435723	0.0308894	0.042855	0.0479051
427	0.0128208	0.00820197	0.0126031	0.0153665		0.0428119	0.0303586	0.0421089	0.0470587
428	0.0125025	0.00799698	0.0122888	0.0149838		0.0417502	0.0295982	0.0410616	0.0458965
429	0.0118898	0.00761278	0.0116875	0.0142488		0.0396699	0.0281491	0.0390099	0.043601
430	0.0104299	0.00668039	0.0102526	0.0124979		0.0347775	0.0246915	0.034218	0.0382208
431	0.0103433	0.00662259	0.0101673	0.0123949		0.0345049	0.0244906	0.033931	0.0379195
432	0.0134088	0.00859281	0.0131807	0.0160653		0.0446914	0.0317359	0.0439597	0.0491103
433	0.0135168	0.00866407	0.0132861	0.0161927		0.0450357	0.0319942	0.0442897	0.0494833
434	0.0125648	0.0080533	0.0123509	0.0150544		0.041865	0.0297417	0.0411763	0.0460113
435	0.0131316	0.0084155	0.0129086	0.0157339		0.0437588	0.0310903	0.0430415	0.0480917
436	0.0148494	0.0095234	0.014598	0.0177881		0.0494546	0.0351505	0.0486369	0.0543327
437	0.014707	0.00943923	0.0144569	0.0176136		0.0489238	0.0348062	0.0481204	0.0537444
438	0.0134358	0.00862808	0.0132074	0.016089		0.044677	0.0317933	0.0439453	0.0490673
439	0.0138718	0.00889882	0.0136346	0.0166154		0.0461691	0.0328263	0.0454231	0.0507315
440	0.0143664	0.00922175	0.0141207	0.0172042		0.0477904	0.0340028	0.0470013	0.0524962
441	0.014961	0.00961134	0.0147042	0.0179132		0.0497272	0.0354088	0.0488951	0.0546053
442	0.0160841	0.0103363	0.0158091	0.0192565		0.0534432	0.038063	0.0525536	0.0586799
443	0.0156555	0.0100542	0.0153877	0.0187461		0.0520515	0.0370587	0.0511906	0.0571734
444	0.0160411	0.0103064	0.0157662	0.0192047		0.0532997	0.0379626	0.0524245	0.0585364
445	0.0156876	0.0100752	0.0154192	0.0187859		0.0521519	0.0371304	0.0512911	0.0572882
446	0.0150384	0.00966699	0.0147821	0.0180022		0.0499424	0.0355809	0.0491103	0.0548348
447	0.0163198	0.0104995	0.0160398	0.0195314		0.0541462	0.0386082	0.0532566	0.0594403
448	0.0165526	0.0106406	0.0162694	0.0198168		0.0549639	0.0391677	0.0540601	0.0603585
449	0.0167064	0.0107534	0.016421	0.0199931		0.0554087	0.0395264	0.0544905	0.0608176
450	0.0172346	0.0110982	0.0169389	0.0206225		0.057116	0.0407746	0.0561835	0.0626971
451	0.0179109	0.0115351	0.0176023	0.0214297		0.0593542	0.0423671	0.0583786	0.0651361
452	0.0172912	0.0111389	0.0169935	0.0206882		0.0572882	0.0409037	0.0563413	0.0628692
453	0.0162963	0.0105011	0.0160172	0.0194984		0.053974	0.0385508	0.0530845	0.0592394
454	0.0170658	0.0110028	0.016772	0.0204138		0.0564847	0.0403729	0.0555522	0.0619797
455	0.0171928	0.0110841	0.0168981	0.0205686		0.0569152	0.0406742	0.0559683	0.0624532
456	0.0176521	0.0113832	0.0173489	0.0211147		0.0584073	0.0417502	0.057446	0.0640887
457	0.0179973	0.0116079	0.017687	0.0215253		0.0595407	0.042568	0.0585507	0.0653226
458	0.0173964	0.0112157	0.017097	0.0208083		0.0575895	0.041162	0.0566282	0.0631849
459	0.0173656	0.0111998	0.0170641	0.0207671		0.057446	0.0410759	0.0564991	0.0630271
460	0.0174452	0.0112498	0.0171435	0.0208646		0.057733	0.0412768	0.0567717	0.0633283
461	0.0178892	0.0115372	0.0175778	0.021392		0.059182	0.0423241	0.0581921	0.0649209
462	0.0180834	0.0116694	0.0177688	0.0216219		0.0597846	0.0427832	0.0587946	0.0655808
463	0.0179494	0.0115766	0.0176368	0.0214642		0.0593685	0.0424532	0.0583786	0.0651361
464	0.0177014	0.0114251	0.0173939	0.0211641		0.0585077	0.041865	0.0575321	0.0641748
465	0.0175368	0.0113288	0.0172338	0.0209649		0.0579051	0.0414776	0.0569439	0.0635149
466	0.0177637	0.0114808	0.0174562	0.0212325		0.0586225	0.0420085	0.0576469	0.0642753
467	0.0174408	0.0112674	0.0171391	0.0208499		0.0575895	0.0412481	0.0566282	0.0631562
468	0.0176976	0.0114352	0.0173907	0.0211544		0.0584216	0.0418507	0.057446	0.06406
469	0.0178471	0.0115354	0.0175367	0.0213324		0.0588951	0.0422093	0.0579195	0.0645909
470	0.0173067	0.0111846	0.0170054	0.0206867		0.057116	0.0409324	0.0561691	0.0626397
471	0.0173335	0.0112045	0.0170316	0.0207162		0.0571878	0.0409898	0.0562408	0.0627114
472	0.018297	0.011826	0.0179782	0.0218675		0.0603728	0.043271	0.0593685	0.0661978
473	0.0180984	0.0116988	0.017784	0.0216312		0.0597129	0.0427976	0.0587229	0.0654804
474	0.0181367	0.0117149	0.0178205	0.0216778		0.059885	0.0428836	0.0588807	0.0656669
475	0.0183538	0.0118533	0.0180337	0.0219379		0.0606167	0.0434001	0.0595981	0.0664704
476	0.0178879	0.0115508	0.0175753	0.0213798		0.0590816	0.0422954	0.0580916	0.0647774
477	0.0179995	0.0116208	0.0176812	0.0215125		0.0594546	0.042568	0.0584503	0.0651935
478	0.0185405	0.0119716	0.0182129	0.0221567		0.0612193	0.0438449	0.0602007	0.0671303
479	0.0184533	0.0119177	0.018125	0.0220499		0.060918	0.043644	0.0598994	0.0668004
480	0.0185127	0.0119592	0.0181828	0.0221186		0.0611045	0.0437875	0.0600715	0.0670012
481	0.0189061	0.0122201	0.0185682	0.0225867		0.0623671	0.0447201	0.0613197	0.0683642
482	0.0190537	0.0123218	0.0187124	0.0227586		0.0628118	0.0450644	0.0617502	0.068852
483	0.0188766	0.0122143	0.018536	0.0225414		0.0621806	0.044634	0.0611189	0.0681346
484	0.0185212	0.0119887	0.0181914	0.0221175		0.0609898	0.0438019	0.0599568	0.066829
485	0.017659	0.0114316	0.017343	0.0210874		0.058149	0.0417502	0.0571591	0.0637157
486	0.0154624	0.0100134	0.0151866	0.0184641		0.0508894	0.0365566	0.0500285	0.0557674
487	0.016243	0.0105239	0.0159537	0.0193939		0.0534288	0.038393	0.0525249	0.0585364
488	0.0178327	0.0115512	0.0175154	0.0212923		0.0586799	0.0421519	0.0576899	0.0642896
489	0.0179002	0.011589	0.0175816	0.0213751		0.0589238	0.0423241	0.0579338	0.0645765
490	0.0189048	0.012247	0.0185661	0.0225707		0.0621949	0.0446914	0.0611332	0.0681346
491	0.0186473	0.0120871	0.0183123	0.0222599		0.0613054	0.0440745	0.060258	0.067159
492	0.0176469	0.0114385	0.0173294	0.0210633		0.0580055	0.0417072	0.0570156	0.0635435
493	0.0182571	0.0118358	0.0179303	0.0217926		0.0600141	0.0431562	0.0589955	0.0657387
494	0.0184612	0.0119654	0.0181293	0.0220351		0.0606885	0.0436297	0.0596555	0.0664704
495	0.0186521	0.0120907	0.0183175	0.0222626		0.0613054	0.0440888	0.060258	0.067159
496	0.0188051	0.0121889	0.0184666	0.0224445		0.0618075	0.0444475	0.0607602	0.0677042
497	0.0191573	0.0124197	0.0188116	0.0228627		0.0629553	0.0452796	0.0618793	0.0689524
498	0.0183265	0.0118842	0.017993	0.0218676		0.0602007	0.0433141	0.0591677	0.0659395
499	0.0186182	0.0120741	0.0182792	0.022215		0.0611619	0.0440171	0.0601146	0.0669869
500	0.0181254	0.0117521	0.017794	0.0216268		0.059555	0.042855	0.058522	0.0652222
501	0.017827	0.0115533	0.0174982	0.0212695		0.0585938	0.0421519	0.0575895	0.0641748
502	0.0175808	0.0113803	0.0172527	0.0209775		0.0578621	0.0415781	0.0568434	0.0633714
503	0.0182929	0.0118266	0.0179516	0.0218319		0.0602867	0.043271	0.0592251	0.06604
504	0.0176303	0.0113442	0.0172998	0.0210597		0.0583929	0.0417215	0.0573743	0.0640314
505	0.0185349	0.0119766	0.0181863	0.0221201		0.0611189	0.0438449	0.0600428	0.0669582
506	0.0191465	0.0123675	0.0187867	0.0228506		0.0631562	0.045294	0.0620371	0.069182
507	0.0182342	0.0117785	0.017892	0.0217636		0.0601433	0.0431419	0.0590959	0.0658965
508	0.0177275	0.0114617	0.0173945	0.0211558		0.0584073	0.0419367	0.0573886	0.0639883
509	0.0182726	0.0118218	0.0179303	0.0218031		0.0601576	0.0432136	0.0591103	0.0658965
510	0.0182209	0.0117952	0.0178812	0.021738		0.0599568	0.0430845	0.0589094	0.0656669
511	0.0187893	0.0121739	0.0184396	0.0224136		0.0617645	0.0444331	0.0606885	0.0676325
512	0.0190527	0.0123516	0.0186966	0.0227255		0.0625966	0.0450501	0.0615063	0.0685364
513	0.0180907	0.0117296	0.0177521	0.0215744		0.0594116	0.0427689	0.0583642	0.06505
514	0.0180151	0.0116862	0.017677	0.0214835		0.059139	0.0425967	0.058106	0.0647487
515	0.017881	0.0115978	0.0175441	0.0213211		0.0586942	0.0422667	0.0576612	0.0642466
516	0.017881	0.0115988	0.0175441	0.0213202		0.0586942	0.0422667	0.0576612	0.0642466
517	0.0159226	0.0103318	0.0156222	0.0189849		0.0522523	0.0376469	0.0513341	0.0571878
518	0.016768	0.0108782	0.0164506	0.0199916		0.0550357	0.0396412	0.0540601	0.0602294
519	0.0176136	0.0114248	0.0172786	0.0210005		0.057819	0.0416354	0.056786	0.0632853
520	0.018292	0.0118632	0.0179439	0.0218079		0.0600428	0.0432423	0.0589812	0.0657243
521	0.0185117	0.0120077	0.0181588	0.0220698		0.0607602	0.0437732	0.0596842	0.0665134
522	0.0185735	0.0120462	0.0182187	0.0221435		0.0609754	0.0439166	0.059885	0.066743
523	0.0182838	0.0118564	0.017934	0.0217966		0.0600285	0.043228	0.0589525	0.0656956
524	0.018971	0.0122974	0.0186049	0.0226149		0.0623097	0.0448636	0.0611906	0.068192
525	0.0192189	0.0124484	0.0188461	0.022911		0.0631705	0.0454518	0.0620371	0.0691389
526	0.0184203	0.0119322	0.0180605	0.0219581		0.060545	0.0435723	0.0594546	0.0662695
527	0.0173972	0.0112649	0.0170568	0.0207386		0.0572021	0.041162	0.0561691	0.062611
528	0.0184578	0.011949	0.018095	0.0220017		0.0607028	0.0436727	0.0595981	0.0664417
529	0.0194981	0.0126186	0.0191112	0.0232407		0.0641461	0.0461261	0.0629697	0.0702006
530	0.0192659	0.0124676	0.0188827	0.0229642		0.0633857	0.0455809	0.0622236	0.0693685
531	0.0196017	0.0126837	0.0192112	0.0233633		0.0644905	0.0463844	0.063314	0.070588
532	0.0189738	0.0122773	0.018592	0.0226122		0.0624245	0.0448922	0.0612767	0.0683212
533	0.018459	0.0119444	0.0180881	0.0219978		0.0607315	0.0436727	0.0596124	0.066456
534	0.0190496	0.01233	0.0186668	0.0227008		0.062654	0.0450788	0.0614919	0.0685651
535	0.019503	0.0126272	0.0191116	0.0232405		0.0641174	0.0461404	0.062941	0.0701719
536	0.0197142	0.0127662	0.0193182	0.0234904		0.0648061	0.0466426	0.0636153	0.0709036
537	0.0189726	0.0122884	0.0185899	0.0226044		0.0623527	0.0448779	0.0611906	0.0682207
538	0.0193318	0.0125209	0.0189424	0.0230317		0.0635292	0.0457244	0.0623527	0.069512
539	0.0192015	0.012437	0.0188153	0.0228767		0.0630988	0.0454231	0.0619367	0.0690385
540	0.0184259	0.01193	0.0180541	0.0219529		0.0605737	0.0435867	0.0594546	0.0662839
541	0.0185141	0.0119703	0.0181416	0.0220646		0.0609611	0.0438162	0.059842	0.0667286
542	0.0191223	0.0123564	0.0187354	0.0227897		0.0629984	0.0452509	0.0618219	0.0689524
543	0.0190448	0.0123244	0.0186559	0.0226869		0.0626397	0.0450644	0.0614632	0.0685364
544	0.0193585	0.0125141	0.0189636	0.0230653		0.0637444	0.0458105	0.0625536	0.0697559
545	0.0193566	0.0125168	0.0189615	0.0230607		0.0637157	0.0458105	0.0625249	0.0697272
546	0.0194101	0.0125355	0.0190126	0.0231286		0.063974	0.0459396	0.0627831	0.0700285
547	0.0194983	0.0126059	0.0190991	0.0232292		0.0641892	0.0461404	0.062984	0.0702437
548	0.0193236	0.0124985	0.0189265	0.0230183		0.0635866	0.0457244	0.0623958	0.0695694
549	0.0194428	0.0125819	0.0190423	0.0231576		0.0639453	0.0460113	0.0627401	0.0699567
550	0.0197323	0.0127726	0.0193275	0.0235009		0.0648778	0.0466856	0.0636583	0.0709754
551	0.0195524	0.0126606	0.019149	0.023284		0.0642609	0.0462696	0.0630557	0.0702867
552	0.0197358	0.012781	0.0193284	0.0235022		0.0648491	0.0467	0.0636296	0.0709467
553	0.0194174	0.0125724	0.0190158	0.0231229		0.0638161	0.0459396	0.062611	0.0697989
554	0.0199291	0.0129049	0.0195151	0.0237297		0.0654948	0.0471591	0.0642609	0.0716353
555	0.0200135	0.0129576	0.0195967	0.0238297		0.0657817	0.04736	0.0645335	0.071951
556	0.0197942	0.0128149	0.0193806	0.0235671		0.0650643	0.0468435	0.0638305	0.0711619
557	0.0192203	0.0124401	0.0188173	0.0228833		0.0631849	0.0454805	0.0619797	0.0691102
558	0.0191161	0.0123689	0.0187142	0.0227606		0.0628692	0.0452366	0.0616641	0.0687659
559	0.0188059	0.0121647	0.0184092	0.0223902		0.0618649	0.0445049	0.0606741	0.0676612
560	0.0190908	0.0123464	0.0186849	0.0227273		0.0628118	0.0451792	0.0615923	0.0686942
561	0.0193897	0.0125391	0.0189765	0.023083		0.0638018	0.0458965	0.0625679	0.0697846
562	0.019298	0.0124739	0.0188829	0.0229731		0.0635149	0.0456813	0.062281	0.0694689
563	0.0198699	0.0128393	0.0194421	0.023655		0.0654374	0.0470443	0.0641605	0.071578
564	0.0193667	0.0125101	0.0189482	0.0230562		0.0638018	0.0458535	0.0625536	0.0697846
565	0.0192481	0.0124301	0.0188313	0.0229146		0.0634288	0.0455809	0.0621806	0.0693828
566	0.0190184	0.0122807	0.0186056	0.0226409		0.0626827	0.0450357	0.0614489	0.0685651
567	0.019413	0.0125276	0.0189897	0.0231108		0.064017	0.0459683	0.0627545	0.0700285
568	0.019196	0.0123622	0.0187769	0.0228603		0.0634431	0.0454805	0.0621949	0.0694259
569	0.0185614	0.0118952	0.0181542	0.0221219		0.0616497	0.0440027	0.0604446	0.0675321
570	0.018718	0.0120161	0.0183061	0.0223003		0.0620658	0.0443614	0.0608319	0.0679481
571	0.0187969	0.0120948	0.0183824	0.0223823		0.0621662	0.0445336	0.0609324	0.0680199
572	0.019185	0.0123115	0.0187622	0.0228565		0.0636296	0.0454805	0.0623671	0.0696698
573	0.0194673	0.0124961	0.0190373	0.0231907		0.0645478	0.0461404	0.063271	0.0706741
574	0.0194763	0.0125013	0.0190444	0.0231997		0.0645765	0.0461691	0.0632853	0.0707028
575	0.019149	0.0122846	0.0187251	0.0228118		0.0635292	0.0453944	0.0622667	0.069555
576	0.0190382	0.0122174	0.0186175	0.0226789		0.0631275	0.0451218	0.0618793	0.0691246
577	0.0192892	0.0123837	0.0188639	0.0229765		0.0639453	0.0457244	0.0626684	0.0699998
578	0.019077	0.0122613	0.0186555	0.0227182		0.0631562	0.0452079	0.0618936	0.0691246
579	0.0191903	0.0123506	0.0187704	0.0228504		0.0634431	0.0454661	0.0621949	0.0694259
580	0.0195605	0.0126061	0.019132	0.0232859		0.0645765	0.046327	0.0632996	0.0706454
581	0.019686	0.0127011	0.0192553	0.02343		0.0649065	0.0466139	0.0636153	0.0709897
582	0.0200717	0.0129633	0.0196337	0.023886		0.0661117	0.0475178	0.0648061	0.0722953
583	0.0201456	0.0130203	0.0197068	0.0239706		0.0662839	0.0476756	0.0649926	0.0724962
584	0.0203242	0.0131405	0.0198821	0.0241825		0.0668577	0.048106	0.0655378	0.0730988
585	0.0198391	0.0128284	0.0194088	0.0236064		0.0652509	0.0469582	0.063974	0.0713484
586	0.0194051	0.01254	0.0189842	0.0230908		0.0638592	0.0459252	0.062611	0.0698419
587	0.0197338	0.0127229	0.0193054	0.0234898		0.065093	0.0467287	0.0638161	0.0712193
588	0.0188364	0.0120484	0.0184289	0.0224571		0.0626684	0.0446483	0.0614489	0.0686798
589	0.0161605	0.01022	0.0158097	0.0193119		0.0544188	0.0383213	0.0533427	0.0597702
590	0.0169312	0.010707	0.0165634	0.0202306		0.0570012	0.0401577	0.0558822	0.062611
591	0.0182321	0.0115895	0.0178367	0.0217602		0.0610471	0.0432423	0.0598563	0.0669869
592	0.0179248	0.0113748	0.0175329	0.0214014		0.0601289	0.0424963	0.0589381	0.0659969
593	0.0185386	0.0118346	0.0181332	0.0221097		0.0618075	0.043931	0.060588	0.0677616
594	0.0183981	0.0117317	0.0179941	0.0219448		0.0614058	0.0435867	0.0601863	0.0673312
595	0.0177635	0.011271	0.017372	0.0212082		0.0596124	0.0421232	0.0584216	0.065423
596	0.018988	0.0121554	0.0185675	0.0226253		0.0631131	0.045007	0.0618506	0.0691246
597	0.0187855	0.0120135	0.0183678	0.0223884		0.0625106	0.0445192	0.0612624	0.068479
598	0.0188939	0.0121076	0.0184706	0.0225051		0.0627258	0.0447775	0.0614632	0.0686942
599	0.0190578	0.0122337	0.0186312	0.0226921		0.0631562	0.0451505	0.0618793	0.0691246
600	0.0193007	0.0124307	0.0188683	0.022968		0.0637444	0.04571	0.0624532	0.0697272
601	0.0193159	0.0124717	0.0188823	0.0229741		0.0636153	0.0457387	0.0623384	0.069555
602	0.0192503	0.0124367	0.0188172	0.0228947		0.063357	0.0455666	0.0620801	0.0692681
603	0.0196371	0.0126964	0.0191954	0.0233508		0.0645765	0.0464848	0.063271	0.070588
604	0.0200046	0.0129375	0.0195544	0.0237857		0.065753	0.0473456	0.0644331	0.0718792
605	0.0199526	0.0129113	0.0195061	0.0237241		0.0655521	0.0472165	0.0642322	0.0716497
606	0.0199195	0.0128994	0.0194737	0.023681		0.0653943	0.0471304	0.0640744	0.0714632
607	0.0201616	0.0130652	0.0197123	0.0239677		0.066126	0.0476899	0.0648061	0.0722666
608	0.019975	0.012952	0.0195311	0.0237441		0.0654804	0.0472452	0.0641748	0.0715349
609	0.0200389	0.0130002	0.0195969	0.0238203		0.0656526	0.0473887	0.064347	0.0717358
610	0.0199036	0.0129145	0.0194657	0.0236578		0.0651935	0.0470587	0.0639022	0.0712193
611	0.0200386	0.0130065	0.0196	0.0238191		0.0656095	0.0473743	0.0643183	0.0716784
612	0.0199904	0.0129784	0.0195559	0.0237637		0.0654374	0.0472595	0.0641605	0.0715062
613	0.019761	0.0128295	0.0193313	0.0234889		0.064677	0.0467143	0.0634001	0.0706597
614	0.019514	0.0126739	0.0190928	0.0231965		0.0638448	0.0461261	0.0625966	0.0697559
615	0.0199699	0.0129778	0.0195407	0.0237378		0.0652939	0.0472021	0.0640314	0.0713484
616	0.0193342	0.0125691	0.0189208	0.0229837		0.0631992	0.0456957	0.0619797	0.0690529
617	0.019318	0.0125593	0.018906	0.0229616		0.0631275	0.0456526	0.061908	0.0689668
618	0.0200832	0.0130581	0.0196543	0.0238712		0.0656239	0.047446	0.064347	0.0716927
619	0.0199053	0.0129444	0.0194818	0.0236611		0.0650357	0.04703	0.0637731	0.0710471
620	0.0200414	0.0130284	0.0196178	0.0238246		0.0654948	0.0473456	0.0642322	0.0715636
621	0.0200632	0.0130332	0.0196386	0.0238522		0.0656095	0.047403	0.064347	0.0717071
622	0.0197091	0.0127754	0.0192935	0.0234409		0.0646052	0.0465852	0.0633714	0.070631
623	0.0192949	0.0124808	0.018889	0.0229558		0.0633857	0.045624	0.0621662	0.0693255
624	0.0190587	0.012343	0.0186579	0.0226717		0.0625249	0.0450644	0.0613341	0.0683785
625	0.0191652	0.0124292	0.0187629	0.0227925		0.0627831	0.045294	0.061578	0.0686368
626	0.0194786	0.0126316	0.0190723	0.0231664		0.0638161	0.04604	0.0625966	0.0697702
627	0.0196374	0.0127057	0.0192289	0.0233634		0.0644761	0.0464274	0.0632566	0.0705306
628	0.0184909	0.0118038	0.0181069	0.0220485		0.061578	0.0438162	0.0604159	0.0675177
629	0.0192741	0.0124144	0.0188744	0.0229484		0.0635866	0.0455953	0.0623814	0.0696124
630	0.0189928	0.0122476	0.0186015	0.0226106		0.0625823	0.0449353	0.0614058	0.0685077
631	0.0194595	0.0126097	0.0190582	0.0231461		0.0637874	0.0459826	0.0625823	0.0697415
632	0.0190992	0.0123659	0.0187061	0.0227222		0.062654	0.0451361	0.0614776	0.0685364
633	0.0197928	0.0128524	0.0193875	0.0235373		0.0647344	0.0467574	0.0635149	0.0707602
634	0.0196732	0.0128023	0.0192715	0.0233882		0.0642035	0.0464561	0.0629984	0.0701576
635	0.0199775	0.013006	0.0195706	0.0237496		0.0651648	0.0471591	0.0639453	0.0712049
636	0.019735	0.0128581	0.0193328	0.0234586		0.0643039	0.0465852	0.0631131	0.0702724
637	0.0200561	0.0130698	0.0196493	0.0238394		0.0653369	0.0473313	0.0641174	0.0713914
638	0.0203163	0.0132615	0.0199072	0.0241449		0.066083	0.0479338	0.0648491	0.0721805
639	0.020116	0.0131364	0.0197128	0.0239061		0.06538	0.047446	0.0641748	0.0714201
640	0.0199628	0.0130476	0.0195623	0.0237196		0.0648348	0.047073	0.0636296	0.0708032
641	0.0199698	0.0130574	0.0195707	0.0237291		0.0648204	0.0470874	0.0636296	0.0708032
642	0.019917	0.0130319	0.0195204	0.0236662		0.0646052	0.0469582	0.0634144	0.0705593
643	0.020158	0.0131831	0.0197595	0.0239557		0.065423	0.0475321	0.0642322	0.0714632
644	0.0201345	0.0131759	0.0197356	0.0239241		0.0652939	0.0474604	0.0641031	0.0713197
645	0.0201087	0.0131406	0.0197119	0.023899		0.0653082	0.0474173	0.0641174	0.0713484
646	0.0193829	0.012603	0.0190014	0.0230546		0.0632853	0.0457387	0.0621375	0.0691963
647	0.018801	0.0121389	0.0184306	0.0223926		0.0618649	0.0444044	0.0607315	0.0677473
648	0.0187034	0.0120515	0.0183376	0.0222838		0.0616641	0.0441892	0.060545	0.0675608
649	0.0184176	0.0118782	0.0180582	0.0219418		0.0606741	0.0435006	0.0595694	0.066456
650	0.0190131	0.0123789	0.0186428	0.0226143		0.0619941	0.0448492	0.060875	0.067776
651	0.0199349	0.0129963	0.0195461	0.023704		0.0649065	0.0470156	0.0637301	0.0709467
652	0.018436	0.0118681	0.018076	0.0219706		0.0608319	0.0435436	0.0597272	0.0666569
653	0.0196971	0.012844	0.0193156	0.0234219		0.0641174	0.0464417	0.0629553	0.0700859
654	0.0195287	0.0127371	0.0191511	0.0232202		0.0635435	0.04604	0.0623958	0.0694546
655	0.0185709	0.0120662	0.018213	0.0221003		0.0606885	0.0437875	0.0595981	0.0663986
656	0.0165682	0.0107796	0.0162502	0.0197081		0.0540457	0.0390816	0.0530845	0.0591103
657	0.017001	0.011063	0.0166746	0.0202234		0.0554518	0.0401003	0.0544618	0.0606454
658	0.0192456	0.0125676	0.0188767	0.0228823		0.0625392	0.0453514	0.0614202	0.0683498
659	0.0194315	0.0126949	0.01906	0.0230999		0.0631131	0.0457961	0.0619797	0.0689668
660	0.0194684	0.0127116	0.0190982	0.0231463		0.063271	0.0458965	0.0621375	0.0691533
661	0.0195836	0.0127792	0.0192111	0.0232839		0.0636727	0.0461691	0.0625536	0.069598
662	0.0195952	0.0127665	0.0192224	0.0233064		0.0638305	0.0462122	0.0626971	0.0697989
663	0.0193061	0.0125926	0.0189398	0.0229573		0.0627975	0.0455092	0.0616928	0.0686511
664	0.0197265	0.0129126	0.0193537	0.0234473		0.0639309	0.0464704	0.0628118	0.0698563
665	0.01986	0.0130276	0.0194857	0.0235985		0.0642179	0.0467574	0.0630844	0.0701289
666	0.0200018	0.0131422	0.0196241	0.0237607		0.0645622	0.047073	0.0634144	0.0704876
667	0.0200663	0.0132026	0.0196904	0.0238353		0.064677	0.0472165	0.0635435	0.0706023
668	0.0201444	0.0132667	0.0197672	0.0239242		0.0648491	0.0473743	0.0637157	0.0707889
669	0.0204859	0.0134988	0.0201039	0.0243304		0.0659252	0.0481777	0.0647774	0.071951
670	0.02044	0.0134726	0.0200591	0.024274		0.065753	0.048063	0.0646052	0.0717501
671	0.020465	0.0134927	0.0200846	0.0243034		0.0658104	0.0481204	0.0646626	0.0718219
672	0.0203193	0.0133998	0.0199428	0.0241295		0.0653226	0.047776	0.0641892	0.071291
673	0.0206537	0.0136231	0.0202709	0.024526		0.0663843	0.0485508	0.0652222	0.0724388
674	0.0206066	0.0135958	0.0202261	0.0244693		0.0662121	0.048436	0.0650643	0.0722523
675	0.0204459	0.0134931	0.0200701	0.0242793		0.0656813	0.048063	0.0645478	0.0716784
676	0.020612	0.0136035	0.0202328	0.0244755		0.0661978	0.0484503	0.06505	0.0722379
677	0.020429	0.0134863	0.0200546	0.0242599		0.0656095	0.0480199	0.0644761	0.0715923
678	0.0205068	0.0135383	0.02013	0.0243515		0.0658534	0.0481921	0.0647057	0.0718506
679	0.0202012	0.0133391	0.0198327	0.0239895		0.0648491	0.0474747	0.0637301	0.0707745
680	0.0203913	0.0134652	0.0200191	0.0242147		0.0654517	0.0479195	0.0643326	0.0714345
681	0.0202834	0.0133941	0.0199137	0.0240861		0.0651074	0.0476612	0.0639883	0.0710471
682	0.0202866	0.0133968	0.0199173	0.02409		0.0651217	0.0476756	0.0639883	0.0710615
683	0.0202717	0.0133857	0.0199023	0.0240729		0.0650643	0.0476326	0.0639453	0.0710041
684	0.0201859	0.0133267	0.0198193	0.0239699		0.0648061	0.0474317	0.063687	0.0707171
685	0.0204049	0.013478	0.0200342	0.0242292		0.0654804	0.0479482	0.064347	0.0714488
686	0.0202975	0.0134004	0.0199295	0.0241033		0.0651648	0.0476899	0.0640457	0.0711045
687	0.0146425	0.00893152	0.0143744	0.0176217		0.0509898	0.0348205	0.0501003	0.0564417
688	0.0166224	0.0104569	0.0163201	0.0198816		0.0560974	0.039426	0.0551361	0.0617358
689	0.0166725	0.010498	0.0163696	0.0199399		0.0562265	0.0395408	0.0552509	0.0618649
690	0.0173099	0.0110042	0.0169945	0.0206627		0.057776	0.0409755	0.056786	0.0634575
691	0.017941	0.0115216	0.0176179	0.0213837		0.0592681	0.0424102	0.0582494	0.0649783
692	0.018099	0.0116724	0.0177735	0.0215613		0.0595263	0.0427402	0.0585077	0.0652365
693	0.0170705	0.0109095	0.0167641	0.0203816		0.0567286	0.0403155	0.055753	0.0622953
694	0.0165487	0.0105738	0.0162519	0.0197638		0.0549926	0.0390243	0.0540601	0.0604302
695	0.0176628	0.0114166	0.0173449	0.0210489		0.0579769	0.0415924	0.0569869	0.0635579
696	0.0177105	0.0114559	0.0173926	0.0211019		0.0580916	0.0417072	0.0571017	0.0636727
697	0.0195642	0.0128209	0.0192149	0.023258		0.0632853	0.0460257	0.0622093	0.0691676
698	0.0192428	0.0126009	0.0188996	0.0228786		0.0622953	0.0452796	0.0612337	0.0680916
699	0.0182435	0.0118256	0.0179189	0.0217298		0.0597129	0.0429697	0.0586942	0.0654087
700	0.0180034	0.0116615	0.0176829	0.0214488		0.0589668	0.0423958	0.0579625	0.0646052
701	0.0175618	0.0113014	0.0172505	0.0209467		0.0579195	0.0414059	0.0569439	0.0635435
702	0.0179353	0.0115958	0.0176171	0.0213716		0.058852	0.0422667	0.0578621	0.0645048
703	0.0180833	0.0117294	0.0177627	0.0215424		0.059139	0.0425537	0.058149	0.0647918
704	0.0190433	0.0124359	0.018707	0.0226627		0.0618362	0.0447775	0.0607889	0.0676468
705	0.018873	0.0122633	0.0185399	0.0224654		0.0615923	0.0444618	0.0605593	0.0674316
706	0.0190892	0.0124475	0.018752	0.0227106		0.0620658	0.0449496	0.0610184	0.0679051
707	0.0191308	0.0124817	0.0187929	0.0227579		0.0621662	0.0450357	0.0611189	0.0680055
708	0.0191983	0.0125187	0.018861	0.0228377		0.0624101	0.0452079	0.0613628	0.0682781
709	0.0195529	0.0128294	0.0192079	0.0232405		0.0631562	0.0459826	0.0620945	0.0690098
710	0.0193946	0.0126766	0.0190526	0.0230619		0.0628836	0.0456526	0.0618219	0.0687516
711	0.01951	0.0127822	0.0191665	0.0231921		0.0630988	0.0458965	0.0620371	0.0689668
712	0.0196062	0.0128839	0.0192617	0.0232992		0.0632136	0.0460974	0.0621519	0.0690672
713	0.019311	0.012652	0.0189709	0.0229553		0.0624532	0.0454374	0.0614058	0.0682638
714	0.0194385	0.0127491	0.0190961	0.0231072		0.0628118	0.04571	0.0617502	0.0686511
715	0.0185075	0.0120565	0.0181829	0.0220217		0.0602294	0.0435867	0.0592251	0.0659108
716	0.0184022	0.0119626	0.018078	0.0219024		0.0600141	0.0433428	0.0590098	0.0656956
717	0.0140467	0.00871685	0.013798	0.0168667		0.0480773	0.033185	0.0472595	0.0531419
718	0.0125212	0.00766664	0.0123001	0.0150796		0.0434288	0.0295551	0.0426971	0.0481634
719	0.0115089	0.00706065	0.0113043	0.0138559		0.039842	0.0271305	0.0391677	0.0441892
720	0.011849	0.00719442	0.0116394	0.0142929		0.0414202	0.027977	0.0407316	0.0460257
721	0.0143071	0.00898939	0.0140557	0.0171374		0.0483499	0.0337589	0.0475321	0.053314
722	0.0176251	0.0113818	0.0173179	0.0210026		0.0578764	0.0415494	0.0569152	0.0634431
723	0.0157623	0.0100242	0.0154855	0.0188392		0.0525967	0.0371591	0.0517215	0.0578621
724	0.0134784	0.00840791	0.0132411	0.0161682		0.0458822	0.0318076	0.0451075	0.0506885
725	0.012865	0.00792782	0.0126392	0.0154736		0.0443327	0.0303729	0.0435867	0.0491103
726	0.0137208	0.00854415	0.0134804	0.0164679		0.0467861	0.0323815	0.0460113	0.0517215
727	0.0143574	0.00900888	0.0141068	0.0172062		0.0485795	0.0338736	0.047776	0.0536153
728	0.0129679	0.00805019	0.012741	0.0155741		0.0443614	0.0306025	0.0436154	0.0490673
729	0.0141791	0.00896512	0.0139313	0.0169695		0.0476182	0.0334432	0.0468291	0.0524675
730	0.0147977	0.00928297	0.0145396	0.0177339		0.0500716	0.034921	0.0492251	0.0552365
731	0.0140631	0.00880652	0.0138172	0.016857		0.0476756	0.0331993	0.0468865	0.0526254
732	0.0158584	0.0101228	0.0155816	0.0189428		0.0527114	0.03736	0.0518363	0.0579482
733	0.0174842	0.0113037	0.017181	0.0208386		0.0573599	0.0411763	0.0563987	0.0628836
734	0.0181772	0.0118185	0.0178626	0.0216473		0.0592824	0.0427689	0.0583068	0.0649352
735	0.0176823	0.011463	0.0173764	0.0210704		0.0578621	0.0416211	0.0569008	0.0634001
736	0.0176183	0.0113888	0.017314	0.0209953		0.057776	0.041492	0.0568147	0.0633283
737	0.0177292	0.0114771	0.017424	0.0211288		0.0580916	0.0417502	0.0571304	0.0636727
738	0.0184477	0.0120461	0.0181288	0.0219433		0.0598707	0.0434145	0.0588807	0.0654948
739	0.0181254	0.0118482	0.0178122	0.0215607		0.0587659	0.0426254	0.0577903	0.0642753
740	0.018869	0.0123935	0.018543	0.0224292		0.060875	0.0443471	0.0598563	0.0665134
741	0.0188423	0.0124059	0.0185173	0.0223888		0.0606167	0.044261	0.0596124	0.0662265
742	0.0190501	0.0125851	0.018722	0.0226268		0.0610758	0.0447201	0.0600715	0.0666856
743	0.0196176	0.0129735	0.01928	0.0232977		0.0628262	0.04604	0.0617932	0.0685794
744	0.0196972	0.0130529	0.0193581	0.0233869		0.062941	0.0461978	0.061908	0.0686798
745	0.0198219	0.0131602	0.0194787	0.0235298		0.0632136	0.0464704	0.0621662	0.0689524
746	0.0199373	0.0132369	0.0195929	0.023668		0.0635866	0.046743	0.0625392	0.0693685
747	0.020036	0.0133096	0.0196898	0.0237824		0.0638735	0.0469726	0.0628118	0.0696554
748	0.0200337	0.0133113	0.0196886	0.0237802		0.0638448	0.0469582	0.0627975	0.0696411
749	0.0198384	0.0131855	0.0194976	0.0235479		0.0632136	0.0464991	0.0621662	0.0689381
750	0.0198542	0.0131951	0.0195122	0.0235675		0.0632566	0.0465278	0.0622093	0.0689955
751	0.0196776	0.0130785	0.0193392	0.0233576		0.0626971	0.0461261	0.0616641	0.0683785
752	0.0197932	0.0131567	0.0194536	0.0234945		0.0630557	0.0463844	0.0620084	0.0687659
753	0.0199263	0.0132484	0.0195837	0.0236518		0.0634575	0.0467	0.0624101	0.0692107
754	0.0199914	0.0132893	0.0196494	0.0237296		0.0636727	0.0468435	0.0626253	0.0694402
755	0.0198995	0.0132293	0.0195599	0.0236215		0.0633857	0.0466426	0.0623527	0.0691389
756	0.0199303	0.0132521	0.0195907	0.0236572		0.0634718	0.0467	0.0624245	0.069225
757	0.0199857	0.0132896	0.0196449	0.0237236		0.063644	0.0468291	0.0625966	0.0694115
758	0.0197668	0.0131424	0.0194297	0.0234642		0.0629553	0.046327	0.0619223	0.0686655
759	0.0194485	0.0128818	0.0191173	0.0230953		0.0621806	0.045624	0.0611619	0.067862
760	0.00497602	0.00237832	0.00488702	0.00630419		0.0209755	0.0113629	0.0206169	0.0243471
761	0.00315012	0.00134262	0.00309244	0.00408609		0.0142166	0.00689094	0.0139655	0.0168866
762	0.0113815	0.00666355	0.0111826	0.0138113		0.0411476	0.0270874	0.040459	0.0459109
763	0.00679355	0.00350304	0.00667359	0.00847238		0.0272022	0.015868	0.0267431	0.031119
764	0.0092014	0.00510788	0.00903972	0.0112967		0.0348349	0.0217933	0.0342467	0.0392682
765	0.011433	0.0066917	0.0112345	0.0138765		0.0413485	0.0272166	0.0406598	0.0461404
766	0.0133165	0.00814794	0.0130872	0.0160095		0.0461691	0.0316642	0.0454087	0.0510759
767	0.016175	0.010271	0.0158961	0.0193092		0.0539883	0.0382926	0.0530988	0.0593255
768	0.0182295	0.0119041	0.0179182	0.0216763		0.0591103	0.0429123	0.058149	0.0646483
769	0.0185415	0.0121884	0.0182243	0.0220311		0.0597272	0.0435723	0.0587373	0.0652509
770	0.0190932	0.0126446	0.018768	0.0226707		0.0610471	0.0447918	0.0600428	0.0666138
771	0.0192268	0.0127758	0.0188987	0.0228243		0.0612767	0.0450644	0.060258	0.066829
772	0.0192792	0.0128237	0.0189499	0.0228842		0.0613771	0.0451648	0.0603585	0.0669295
773	0.0194361	0.0129329	0.0191057	0.0230709		0.0618506	0.0455379	0.0608463	0.0674603
774	0.0193656	0.0128889	0.0190344	0.0229856		0.061621	0.0453657	0.0606024	0.0671877
775	0.0192435	0.0128085	0.018914	0.0228391		0.0612193	0.0450788	0.0602007	0.066743
776	0.0195019	0.0129829	0.0191684	0.0231484		0.0620371	0.0456813	0.0610184	0.0676468
777	0.0192697	0.0128293	0.0189411	0.0228725		0.061291	0.0451361	0.0602867	0.066829
778	0.0191758	0.012765	0.0188485	0.02276		0.0610041	0.0449209	0.0599998	0.0665134
779	0.019216	0.012792	0.0188871	0.0228074		0.0611332	0.0450214	0.0601146	0.0666569
780	0.0191355	0.0127409	0.0188083	0.0227129		0.0608606	0.0448205	0.0598563	0.0663699
781	0.0191788	0.0127694	0.0188517	0.0227643		0.0610041	0.0449209	0.0599998	0.0665134
782	0.0193214	0.012865	0.0189908	0.022932		0.0614489	0.0452509	0.0604302	0.0670012
783	0.0190059	0.0126565	0.0186831	0.02256		0.0604446	0.0445192	0.0594546	0.0659108
784	0.0191227	0.0127364	0.0187974	0.0226982		0.0608032	0.0447918	0.0597989	0.0662982
785	0.0189428	0.0126025	0.0186214	0.0224874		0.0603011	0.0443757	0.0593111	0.0657674
786	0.0191246	0.0127095	0.0187995	0.0227037		0.0609467	0.0448205	0.0599424	0.0664704
787	0.0184907	0.0122034	0.0181763	0.0219712		0.0593685	0.0434001	0.0583929	0.0648348
788	0.0181264	0.0119303	0.0178182	0.0215522		0.0583929	0.042568	0.0574317	0.0638161
789	0.0179955	0.0118016	0.0176873	0.0213976		0.0581347	0.0422811	0.0571734	0.0635579
790	0.0172638	0.011267	0.0169707	0.0205534		0.056083	0.0405594	0.0551648	0.0613915
791	0.0177395	0.0116421	0.0174375	0.0210946		0.0572738	0.0416641	0.0563269	0.062611
792	0.0177153	0.0116483	0.0174138	0.0210619		0.0570873	0.0415924	0.0561404	0.0623814
793	0.0174018	0.011429	0.0171062	0.0206926		0.0561404	0.0408607	0.0552222	0.0613628
794	0.0182334	0.0121079	0.0179244	0.0216476		0.0581347	0.0427258	0.0571878	0.0634288
795	0.0184104	0.0121856	0.0180979	0.0218675		0.0589094	0.0431849	0.0579482	0.0643039
796	0.0172771	0.0112953	0.0169851	0.0205602		0.0560256	0.0406024	0.0551074	0.0613054
797	0.0172513	0.0112677	0.0169595	0.0205402		0.0560543	0.0405594	0.0551361	0.0613484
798	0.0183329	0.0121012	0.0180226	0.0217784		0.0588233	0.0430271	0.0578621	0.0642322
799	0.0181279	0.0119393	0.0178211	0.0215456		0.0583068	0.042568	0.0573456	0.0637014
800	0.0176571	0.0115843	0.0173573	0.0209961		0.0570156	0.041492	0.056083	0.0623384

## Sheet: 30degN
30 degrees N latitude	Daily Irradiance (mE cm-2 d-1 nm-1)					Solar Noon Irradiance (mE cm-2 d-1 nm-1)
wavelength (nm)	March 20th	June 21st	September 22nd	December 22nd		March 20th	June 21st	September 22nd	December 22nd
280	3.25872e-21	3.4625e-19	5.6315e-20	2.5436e-21		3.68722e-20	4.57674e-18	7.85076e-19	1.05566e-20
281	1.56374e-19	1.44114e-17	2.58474e-18	9.03315e-20		2.17933e-18	1.83357e-16	3.51362e-17	3.8106e-19
282	1.14359e-17	6.89184e-16	1.3963e-16	4.83577e-18		1.53945e-16	8.31705e-15	1.82065e-15	1.99569e-17
283	1.03043e-16	4.92839e-15	1.43712e-15	3.51582e-17		1.35451e-15	5.76756e-14	1.769e-14	1.41807e-16
284	2.56018e-15	7.04537e-14	2.28224e-14	4.21831e-16		3.13055e-14	7.65995e-13	2.71735e-13	1.84504e-15
285	1.06679e-14	2.29689e-13	7.90104e-14	1.29618e-15		1.26771e-13	2.39167e-12	9.21087e-13	5.75895e-15
286	2.22172e-13	4.11072e-12	1.41903e-12	2.149e-14		2.58679e-12	4.16211e-11	1.63988e-11	9.56812e-14
287	2.4483e-12	5.07135e-11	9.99955e-12	1.36559e-13		2.82495e-11	5.472e-10	1.09813e-10	6.64991e-13
288	1.9495e-11	2.0941e-10	8.15387e-11	1.05027e-12		2.08895e-10	1.89095e-09	8.46913e-10	6.01863e-12
289	1.65818e-10	1.46902e-09	6.12712e-10	7.79178e-12		1.70731e-09	1.27015e-08	6.12193e-09	4.81204e-11
290	1.30881e-09	9.47862e-09	4.02384e-09	5.15981e-11		1.28809e-08	7.80198e-08	3.89669e-08	3.58679e-10
291	4.85305e-09	3.00088e-08	1.36103e-08	2.1758e-10		4.62696e-08	2.34863e-07	1.25538e-07	1.62266e-09
292	2.52102e-08	1.26704e-07	6.19754e-08	1.35865e-09		2.23959e-07	9.4146e-07	5.31419e-07	1.10028e-08
293	6.58907e-08	2.92076e-07	1.49728e-07	4.1764e-09		5.52079e-07	2.11334e-06	1.20602e-06	3.55522e-08
294	2.05769e-07	7.67772e-07	3.57298e-07	1.51348e-08		1.57101e-06	5.33858e-06	2.62983e-06	1.32209e-07
295	4.91546e-07	1.62009e-06	9.18303e-07	3.8628e-08		3.70874e-06	1.05638e-05	6.72595e-06	3.2568e-07
296	1.71365e-06	5.01598e-06	2.95181e-06	1.5899e-07		1.23099e-05	3.10185e-05	2.06025e-05	1.3142e-06
297	2.5444e-06	6.84526e-06	4.14511e-06	2.71286e-07		1.75896e-05	4.06168e-05	2.78478e-05	2.19798e-06
298	7.75478e-06	1.90407e-05	1.18658e-05	9.90889e-07		5.11189e-05	0.000107604	7.60543e-05	7.78333e-06
299	1.43778e-05	3.31903e-05	2.11564e-05	2.13709e-06		9.14631e-05	0.000181061	0.000130774	1.62984e-05
300	2.01664e-05	4.32932e-05	2.82236e-05	3.78615e-06		0.000122195	0.000225824	0.000165853	2.72596e-05
301	4.31336e-05	8.68091e-05	5.52927e-05	8.58247e-06		0.000248349	0.000433428	0.000311907	5.97416e-05
302	4.54689e-05	8.80712e-05	5.66295e-05	9.51727e-06		0.000255236	0.000427258	0.000311907	6.51361e-05
303	0.00013233	0.000243051	0.000161788	3.22144e-05		0.000713914	0.00113027	0.000852938	0.000210186
304	0.000140231	0.000251096	0.000168527	3.62971e-05		0.000739739	0.00114304	0.000869151	0.000231133
305	0.000248967	0.000424358	0.000291072	7.32421e-05		0.00125322	0.00184791	0.00143285	0.000442036
306	0.000244999	0.000407689	0.000282254	7.66476e-05		0.00120315	0.00173457	0.00135609	0.000449496
307	0.000382599	0.000615772	0.000469965	0.000142475		0.00181061	0.00253084	0.00215781	0.000800715
308	0.000514137	0.000799997	0.000561237	0.000178641		0.00234863	0.00316785	0.0025294	0.000982924
309	0.000494203	0.000760007	0.00053553	0.000176691		0.00222524	0.00296699	0.00237876	0.000956525
310	0.000511721	0.000768419	0.000546939	0.000194012		0.00223529	0.00291247	0.00235867	0.00101506
311	0.000993184	0.00147667	0.00105523	0.000385693		0.00428119	0.00552652	0.00449066	0.00198852
312	0.000897325	0.0013125	0.000944937	0.000362904		0.00378048	0.0048063	0.00393256	0.00182352
313	0.00111395	0.00160756	0.00116379	0.000465627		0.00460113	0.00577616	0.00475034	0.00228837
314	0.00132454	0.00189861	0.00137912	0.00056304		0.00541462	0.00675608	0.00557387	0.00273744
315	0.0014392	0.00202959	0.0014851	0.00063759		0.00573169	0.00704589	0.00585364	0.00301003
316	0.00103609	0.00145399	0.00106638	0.000464573		0.00409324	0.00500859	0.00417072	0.00217503
317	0.00177862	0.0024732	0.00182112	0.000817122		0.00691389	0.00840887	0.00701289	0.00375609
318	0.0014246	0.00197385	0.00145547	0.000661088		0.00549926	0.0066786	0.0055667	0.00301577
319	0.00195454	0.00266917	0.00197918	0.000953236		0.00728835	0.00879624	0.00732279	0.0041822
320	0.00202202	0.00278416	0.00205704	0.000956433		0.00769725	0.00931848	0.00776611	0.00430128
321	0.00205419	0.00277928	0.00206774	0.00103501		0.00748204	0.00896984	0.00749352	0.00441749
322	0.00219967	0.00299716	0.00222288	0.00107689		0.00816784	0.00983641	0.00819509	0.00471017
323	0.00184599	0.00249998	0.0018591	0.000924622		0.00674316	0.00809036	0.00675751	0.00396986
324	0.00256251	0.00341921	0.00255938	0.00129797		0.00920944	0.0107704	0.0091664	0.00547918
325	0.0023244	0.00314232	0.00233744	0.00116826		0.00846626	0.0101334	0.00847199	0.00499998
326	0.00353381	0.00470847	0.00352634	0.00179474		0.0126685	0.0147919	0.0125997	0.00755952
327	0.00350247	0.00465296	0.00348803	0.00179135		0.0124792	0.0145337	0.0123902	0.00749495
328	0.00311284	0.00416525	0.00311431	0.00156183		0.0112654	0.0132008	0.0112295	0.00665995
329	0.00374295	0.00494879	0.00371831	0.00193846		0.0131994	0.0153084	0.0130803	0.00801719
330	0.00429026	0.0056681	0.00425952	0.00222418		0.0151076	0.0175035	0.0149641	0.00919079
331	0.00358044	0.00475411	0.00356566	0.00183003		0.0127575	0.014835	0.0126671	0.00767142
332	0.00383487	0.00505434	0.00380353	0.00200004		0.0134404	0.015538	0.0133027	0.00822235
333	0.00377736	0.00497393	0.00374357	0.00197433		0.0132109	0.015251	0.0130674	0.00809897
334	0.00356052	0.004704	0.00353657	0.00184358		0.0125523	0.0145337	0.0124375	0.00763986
335	0.00379033	0.00497865	0.00391354	0.00207182		0.0131879	0.0151936	0.0136083	0.00846626
336	0.0030747	0.00403731	0.00302955	0.00160584		0.0106972	0.0123127	0.0105294	0.00655521
337	0.00298438	0.0039273	0.00295814	0.0015602		0.0104347	0.0120373	0.0103228	0.00640887
338	0.00360186	0.00472826	0.00372531	0.0019755		0.0125222	0.0144189	0.0129368	0.00807027
339	0.00411243	0.00539735	0.00405582	0.00215334		0.0142941	0.0164418	0.0140817	0.00878189
340	0.00466713	0.00612282	0.00481197	0.00255385		0.0162123	0.0186513	0.0167001	0.0104304
341	0.00410762	0.00538843	0.00405144	0.00215348		0.0142639	0.0163988	0.0140545	0.00878046
342	0.00451051	0.00591496	0.0044524	0.00236965		0.0156527	0.0179913	0.0154375	0.0096499
343	0.00466326	0.0061136	0.0046022	0.00245085		0.0161692	0.0185939	0.0159397	0.00998132
344	0.0033748	0.00442226	0.0033249	0.00176845		0.0117073	0.0134404	0.0115236	0.00721805
345	0.00435467	0.0057046	0.00429762	0.00229105		0.0150932	0.0173314	0.014878	0.00932852
346	0.00378366	0.00495657	0.00373563	0.00199408		0.0131033	0.0150502	0.0129225	0.00811188
347	0.00460885	0.00603584	0.00455043	0.00242988		0.015954	0.018307	0.0157388	0.00988662
348	0.00425556	0.00557132	0.00420227	0.00224607		0.0147202	0.0169009	0.0145193	0.00913196
349	0.0039547	0.00517524	0.00390565	0.00208944		0.0136743	0.0156814	0.0134906	0.00849065
350	0.00485999	0.00635741	0.00480009	0.0025701		0.0168005	0.0192539	0.016571	0.0104404
351	0.00458362	0.00599627	0.00452665	0.00242371		0.0158393	0.0181635	0.0156241	0.00984789
352	0.00480183	0.00627992	0.00474127	0.00253991		0.0165853	0.01901	0.0163558	0.0103213
353	0.00472952	0.00618251	0.00467123	0.00250537		0.0163271	0.0186943	0.0161119	0.0101721
354	0.00524082	0.00685007	0.0051756	0.00277582		0.0180918	0.0207173	0.0178479	0.0112683
355	0.00531761	0.00694912	0.00525151	0.00281786		0.01835	0.0210042	0.0181061	0.0114376
356	0.00505233	0.00659874	0.00498982	0.00268099		0.0174174	0.0199282	0.0171879	0.0108751
357	0.00356822	0.0046606	0.0035237	0.00189328		0.0122998	0.014076	0.0121334	0.00768003
358	0.00347331	0.00453569	0.00343021	0.00184406		0.011967	0.0136929	0.0118063	0.00747917
359	0.00416851	0.00544204	0.00411649	0.00221422		0.0143615	0.0164275	0.0141635	0.00897845
360	0.0056481	0.00737215	0.00557683	0.00300079		0.0194547	0.0222381	0.0191821	0.0121678
361	0.00411952	0.00537596	0.00406803	0.00218976		0.0141807	0.0162123	0.0139885	0.00887658
362	0.00411248	0.00536419	0.00406135	0.00218931		0.014142	0.0161549	0.0139512	0.00886798
363	0.00512188	0.00667685	0.00505766	0.00272918		0.017604	0.0201004	0.0173601	0.0110502
364	0.00578308	0.00753744	0.00571215	0.00308479		0.0198565	0.0226685	0.0195982	0.0124849
365	0.00503843	0.00656763	0.00497552	0.00268778		0.0173027	0.019756	0.0170731	0.010878
366	0.00671909	0.00875477	0.00663584	0.00358797		0.0230559	0.0263127	0.0227546	0.0145193
367	0.00616298	0.00802805	0.00608694	0.00329341		0.0211334	0.0241176	0.0208608	0.0133185
368	0.00560154	0.00729407	0.00553219	0.00299376		0.0192108	0.0219081	0.0189526	0.0121061
369	0.00612839	0.00797835	0.00605176	0.00327786		0.0210042	0.0239454	0.0207173	0.0132496
370	0.00698826	0.00909449	0.00690162	0.00374167		0.0239311	0.0272883	0.0236154	0.0151219
371	0.00581647	0.00756698	0.00574401	0.00311699		0.0199139	0.0226829	0.0196413	0.0125882
372	0.00483424	0.0062894	0.00477397	0.00259052		0.0165423	0.0188522	0.0163271	0.0104605
373	0.00591723	0.00769613	0.00584426	0.00317371		0.0202438	0.0230559	0.0199712	0.0128106
374	0.00561081	0.00729518	0.00554081	0.00301175		0.0191821	0.0218364	0.0189239	0.012152
375	0.00453041	0.00588862	0.00447359	0.00243341		0.0154806	0.0176183	0.0152654	0.00981489
376	0.00561307	0.00729544	0.00554342	0.00301502		0.0191821	0.021822	0.0189239	0.0121606
377	0.00617949	0.0080303	0.00610173	0.00332154		0.0211047	0.0240171	0.0208177	0.0133916
378	0.00786747	0.0102202	0.0077704	0.00423216		0.0268579	0.0305451	0.0264992	0.0170588
379	0.00615328	0.00799225	0.00607695	0.00331083		0.0210042	0.023888	0.0207173	0.0133414
380	0.00585155	0.00760085	0.0057785	0.00314795		0.0199712	0.0227115	0.0196986	0.0126858
381	0.00712748	0.00925464	0.00703733	0.00383907		0.0243041	0.0276326	0.0239741	0.0154662
382	0.00503168	0.00653019	0.00496887	0.00271241		0.0171448	0.0194834	0.0169153	0.0109196
383	0.00398381	0.00516901	0.00393397	0.00214963		0.0135667	0.0154088	0.0133845	0.00864846
384	0.00423957	0.00550014	0.00418643	0.00228866		0.0144332	0.0163988	0.0142381	0.00920513
385	0.00620027	0.00804142	0.00612299	0.00334867		0.0211047	0.0239597	0.0208177	0.0134648
386	0.00496406	0.00643637	0.00490166	0.00268368		0.0168866	0.0191678	0.016657	0.0107862
387	0.0054358	0.00704436	0.00536801	0.00294081		0.0184791	0.0209612	0.0182209	0.0118149
388	0.00565255	0.00732593	0.00558128	0.00305949		0.0192108	0.0217933	0.0189382	0.0122869
389	0.00604797	0.0078358	0.00597172	0.00327549		0.0205451	0.0232998	0.0202582	0.0131506
390	0.00737343	0.00955193	0.007281	0.00399702		0.0250358	0.028393	0.0246915	0.0160401
391	0.00801196	0.0103754	0.00791149	0.00434511		0.0271879	0.0308177	0.0268148	0.0174318
392	0.00689469	0.00892862	0.00680836	0.00374069		0.0233859	0.0265135	0.0230702	0.0150071
393	0.00344918	0.00446486	0.00340625	0.00187337		0.0116929	0.013251	0.0115351	0.0075093
394	0.0051177	0.00662343	0.0050536	0.00278136		0.0173457	0.0196413	0.0171018	0.0111449
395	0.00795899	0.0102962	0.00785791	0.00432696		0.0269583	0.0305307	0.0265853	0.0173314
396	0.00702055	0.00908381	0.0069328	0.00381826		0.0237732	0.0269296	0.0234576	0.0152941
397	0.00309345	0.00400067	0.00305479	0.00168444		0.0104677	0.0118507	0.0103256	0.00674173
398	0.00882015	0.0114067	0.00870855	0.00480103		0.0298421	0.0337875	0.0294404	0.0192108
399	0.00990872	0.0128096	0.00978567	0.00540157		0.0335006	0.0379195	0.0330558	0.0216068
400	0.0102684	0.0132743	0.0101377	0.0055957		0.0347201	0.0392969	0.0342467	0.0223816
401	0.0105625	0.0136574	0.0104298	0.00575051		0.0357388	0.0404446	0.035251	0.0230272
402	0.0111892	0.0144621	0.0110494	0.00609832		0.0378334	0.0427976	0.0373169	0.0244045
403	0.0106674	0.0137831	0.010533	0.0058198		0.0360401	0.0407603	0.0355522	0.0232711
404	0.0105196	0.013591	0.0103871	0.00574103		0.0355379	0.0401864	0.0350501	0.0229554
405	0.0105354	0.0136112	0.0104022	0.00575032		0.0355809	0.0402438	0.0350931	0.0229841
406	0.0104082	0.0134392	0.0102761	0.00568666		0.0351218	0.0396986	0.0346484	0.0227115
407	0.0102809	0.0132723	0.0101512	0.00562399		0.0346627	0.0391677	0.0342036	0.0224533
408	0.0106837	0.0137924	0.0105479	0.00584182		0.0360401	0.0407172	0.0355379	0.0233285
409	0.011459	0.0147935	0.0113148	0.00626934		0.0386369	0.0436584	0.0381204	0.0250214
410	0.0100387	0.0129559	0.00991209	0.00549466		0.0338306	0.0382208	0.0333715	0.0219225
411	0.0109054	0.0140709	0.0107684	0.00597379		0.0367431	0.041492	0.0362409	0.0238306
412	0.0117565	0.0151636	0.0116087	0.00644781		0.0395695	0.044677	0.0390386	0.0256958
413	0.0114627	0.0147863	0.0113179	0.00628419		0.0385938	0.0435723	0.038063	0.0250501
414	0.011644	0.0150157	0.011498	0.00638865		0.0391821	0.0442179	0.0386512	0.0254519
415	0.0117129	0.0150998	0.0115651	0.00643202		0.0393829	0.0444475	0.0388521	0.0256097
416	0.0119697	0.0154243	0.0118195	0.00658057		0.0402151	0.0453657	0.0396699	0.0261836
417	0.0116989	0.0150766	0.0115529	0.00643313		0.0392969	0.0443327	0.038766	0.0255953
418	0.0115057	0.014823	0.0113615	0.00632974		0.0386369	0.0435723	0.0381204	0.0251793
419	0.0116823	0.0150491	0.0115362	0.00643084		0.0392251	0.0442179	0.0386943	0.0255666
420	0.0116557	0.0150119	0.0115072	0.00641645		0.0391247	0.0441032	0.0385795	0.0255092
421	0.0122257	0.0157459	0.0120729	0.00673455		0.0410185	0.0462409	0.040459	0.0267574
422	0.0116467	0.0149973	0.0115006	0.0064181		0.0390673	0.0440314	0.0385365	0.0254949
423	0.0114088	0.0146888	0.0112652	0.0062909		0.0382495	0.0431132	0.037733	0.0249784
424	0.0120899	0.015565	0.0119372	0.00666716		0.0405307	0.0456813	0.0399855	0.0264705
425	0.0121108	0.0155873	0.0119582	0.00668455		0.0405881	0.04571	0.0400286	0.0265279
426	0.0118485	0.0152417	0.0117001	0.00654901		0.0396699	0.0446627	0.0391247	0.0259683
427	0.0116425	0.0149762	0.0114965	0.00643476		0.0389669	0.0438736	0.038436	0.0255092
428	0.0113534	0.0146049	0.0112085	0.00627399		0.0380056	0.0427832	0.0374748	0.024878
429	0.0108004	0.0138878	0.0106646	0.00597805		0.0361118	0.0406455	0.035624	0.0236728
430	0.00947655	0.0121825	0.00935703	0.00524762		0.0316785	0.0356383	0.0312481	0.0207747
431	0.00939575	0.012081	0.00927674	0.005201		0.0314203	0.0353514	0.0309899	0.0206025
432	0.0121829	0.0156592	0.0120303	0.00675173		0.0407029	0.0457961	0.0401433	0.0267287
433	0.0122831	0.0157851	0.0121292	0.00681061		0.0410185	0.0461404	0.040459	0.026944
434	0.0114173	0.0146727	0.0112748	0.00632991		0.0381347	0.042898	0.0376182	0.0250358
435	0.0119329	0.0153362	0.0117793	0.00661327		0.0398564	0.0448349	0.0393112	0.0261692
436	0.013496	0.01734	0.0133255	0.0074893		0.0450501	0.0506598	0.0444331	0.0296125
437	0.0133683	0.0171684	0.0132017	0.00742917		0.0445766	0.0501146	0.043974	0.0293399
438	0.012215	0.0156828	0.012063	0.00679381		0.0407172	0.0457531	0.0401577	0.0268148
439	0.0126072	0.0161946	0.0124471	0.00699873		0.0420659	0.0473026	0.041492	0.0276613
440	0.0130572	0.0167683	0.0128935	0.00725676		0.0435436	0.0489381	0.042941	0.0286656
441	0.0136016	0.0174593	0.0134346	0.00757011		0.0453083	0.0509037	0.0447057	0.0298708
442	0.0146242	0.0187679	0.0144512	0.00814819		0.0487086	0.0547057	0.048063	0.032152
443	0.0142296	0.0182687	0.0140897	0.00793972		0.0474317	0.0532997	0.0468865	0.0313342
444	0.0145839	0.0187185	0.0144149	0.00812702		0.0485795	0.0545766	0.0479482	0.0320659
445	0.0142631	0.0183096	0.0141015	0.00794562		0.0475321	0.0534001	0.0469295	0.0313629
446	0.0136762	0.0175458	0.0135238	0.00763171		0.0455235	0.0511189	0.0449496	0.030086
447	0.014844	0.0190402	0.0146644	0.00828473		0.0493686	0.0554231	0.0487086	0.0326398
448	0.0150543	0.019317	0.0148639	0.0083848		0.0501146	0.0562839	0.0494259	0.0330558
449	0.0151976	0.01949	0.0150087	0.00848303		0.0505163	0.0567143	0.049842	0.0334002
450	0.0156798	0.0201014	0.0154856	0.00876004		0.0520945	0.0584503	0.0513915	0.0344762
451	0.0162957	0.0208885	0.0160923	0.00910601		0.0541318	0.0607315	0.0534001	0.0358248
452	0.0157331	0.0201664	0.0155368	0.00879348		0.0522523	0.0586225	0.051535	0.034591
453	0.0148311	0.0190063	0.0146445	0.00829303		0.0492394	0.0552365	0.0485651	0.0326111
454	0.0155319	0.0199004	0.0153387	0.00869369		0.051535	0.0577903	0.050832	0.0341606
455	0.0156491	0.0200488	0.0154548	0.00875766		0.0519224	0.0582208	0.0512193	0.0344188
456	0.0160657	0.0205816	0.0158672	0.00899637		0.0532853	0.0597559	0.052568	0.0353514
457	0.0163795	0.0209818	0.0161774	0.0091745		0.0543183	0.0609037	0.0535866	0.0360401
458	0.0158301	0.0202828	0.0156334	0.00885925		0.0525249	0.0589094	0.0518076	0.0348205
459	0.0158018	0.0202415	0.015608	0.00885042		0.0524102	0.0587659	0.0517071	0.0347775
460	0.0158725	0.0203335	0.0156767	0.00888702		0.0526541	0.0590385	0.0519367	0.0349353
461	0.0162755	0.0208484	0.016077	0.00911593		0.053974	0.0605163	0.0532566	0.0358248
462	0.0164553	0.0210726	0.0162551	0.00922544		0.0545335	0.0611332	0.0538162	0.0362266
463	0.016332	0.020919	0.0161297	0.00914866		0.0541605	0.0607172	0.0534288	0.0359396
464	0.0161098	0.0206294	0.0159116	0.0090357		0.0533858	0.0598276	0.0526541	0.0354662
465	0.0159658	0.020435	0.0157694	0.00896631		0.0528549	0.0592107	0.0521376	0.0351649
466	0.0161753	0.0206969	0.0159765	0.00909216		0.0535005	0.0599281	0.0527832	0.035624
467	0.0158793	0.0203236	0.0156841	0.00891917		0.0525536	0.0588807	0.0518506	0.034964
468	0.0161117	0.0206193	0.0159155	0.00905428		0.053314	0.0597272	0.0525967	0.0354949
469	0.0162492	0.0207916	0.0160559	0.0091376		0.0537588	0.060215	0.0530558	0.0358105
470	0.0157545	0.0201611	0.0155785	0.0088658		0.0521232	0.0583929	0.0514776	0.0347488
471	0.0157801	0.0201915	0.0155967	0.00887852		0.0521949	0.0584647	0.0515206	0.0347775
472	0.0166583	0.0213147	0.0164616	0.00937072		0.0550931	0.0617071	0.0543757	0.0367144
473	0.0164776	0.0210838	0.0162845	0.00926992		0.0545048	0.0610471	0.0537875	0.0363126
474	0.0165098	0.0211292	0.0163064	0.00927265		0.0546483	0.0612193	0.0539023	0.0363557
475	0.0167046	0.0213818	0.0164974	0.009379		0.0553083	0.0619654	0.0545479	0.0367861
476	0.0162767	0.0208363	0.0160793	0.00913804		0.0539023	0.0603872	0.0531706	0.0358392
477	0.0163765	0.0209646	0.0161763	0.00919205		0.0542322	0.0607745	0.0535005	0.0360687
478	0.0168667	0.0215901	0.0166627	0.0094712		0.0558535	0.0625679	0.0551074	0.0371591
479	0.0167854	0.0214838	0.016584	0.00942859		0.0555665	0.0622523	0.0548348	0.036987
480	0.0168385	0.0215506	0.0166384	0.00946163		0.0557387	0.0624388	0.055007	0.0371161
481	0.017198	0.0220035	0.0169953	0.00967228		0.0569008	0.0637157	0.0561548	0.0379195
482	0.0173341	0.0221715	0.0171317	0.00975942		0.0573169	0.0641605	0.0565565	0.0382352
483	0.0171757	0.0219604	0.0169757	0.0096805		0.056743	0.0635005	0.0559969	0.0378908
484	0.0168548	0.0215488	0.0166582	0.0095046		0.055667	0.062281	0.0549353	0.0371878
485	0.0160717	0.0205453	0.015892	0.00907068		0.0530701	0.0593685	0.0523958	0.0354805
486	0.0140763	0.0179907	0.0139155	0.00794845		0.0464561	0.0519654	0.0458535	0.0310759
487	0.0147893	0.0188987	0.0146206	0.00835636		0.0487803	0.0545622	0.0481491	0.0326541
488	0.0162352	0.0207491	0.0160477	0.00916751		0.0535723	0.0599137	0.0528693	0.0358248
489	0.0162939	0.0208284	0.0161059	0.00919499		0.0537875	0.0601863	0.0530845	0.035954
490	0.0172094	0.0219928	0.0170118	0.00972054		0.0567717	0.0635005	0.05604	0.0379913
491	0.0169774	0.0216888	0.0167816	0.00959718		0.0559683	0.0625823	0.0552365	0.0374891
492	0.0160661	0.0205227	0.0158786	0.00908263		0.0529553	0.0592107	0.0522667	0.0354662
493	0.016622	0.0212336	0.0164285	0.0093983		0.0547918	0.0612624	0.0540744	0.0367
494	0.0168077	0.0214705	0.0166104	0.0095004		0.0554087	0.061951	0.054677	0.0371017
495	0.0169813	0.0216924	0.0167823	0.00960015		0.0559683	0.0625823	0.0552365	0.0374891
496	0.01712	0.021868	0.0169199	0.00967899		0.0564274	0.0630844	0.0556957	0.0377904
497	0.0174394	0.0222753	0.0172371	0.00986293		0.0574747	0.0642466	0.0567286	0.0385078
498	0.0166801	0.0213046	0.0164889	0.00943824		0.0549639	0.0614345	0.0542466	0.0368435
499	0.0169422	0.0216403	0.0167507	0.00958729		0.0558248	0.0624101	0.0551074	0.0374317
500	0.01649	0.0210627	0.0163105	0.00933225		0.054347	0.0607602	0.0536727	0.0364418
501	0.0162125	0.0207136	0.0160409	0.00917206		0.0534718	0.0597846	0.0528119	0.0358392
502	0.0159773	0.0204236	0.0158364	0.00904347		0.0527688	0.0590242	0.0521806	0.0353801
503	0.0166143	0.0212514	0.0165044	0.00941399		0.0549496	0.0614919	0.0544475	0.0368722
504	0.0159749	0.0204808	0.0160769	0.00913398		0.0531132	0.0595837	0.0531849	0.0358822
505	0.0168267	0.0215297	0.016717	0.00952522		0.0556813	0.0623384	0.0551792	0.0373313
506	0.0173776	0.0222373	0.0173075	0.00986526		0.0575321	0.0644187	0.057116	0.0386512
507	0.0165507	0.0211775	0.0165043	0.00941008		0.0547918	0.0613484	0.0544618	0.0368578
508	0.0160967	0.0205878	0.0160249	0.00914709		0.0532279	0.0595694	0.0528262	0.0357962
509	0.0165981	0.0212217	0.0164945	0.00942005		0.0548492	0.0613628	0.0543614	0.0368578
510	0.0165565	0.0211628	0.0164314	0.00938947		0.0546627	0.0611476	0.0541318	0.0367144
511	0.0170803	0.0218223	0.016917	0.00967583		0.0563413	0.062984	0.0556813	0.0378048
512	0.0173229	0.0221266	0.0171439	0.00981057		0.0571017	0.0638305	0.056413	0.0383213
513	0.0164469	0.0210062	0.016274	0.00931637		0.0542036	0.0605737	0.0535292	0.0363844
514	0.0163792	0.0209163	0.0162029	0.0092801		0.0539596	0.0603011	0.0532853	0.0362266
515	0.0162557	0.0207563	0.0160813	0.00921103		0.0535436	0.0598276	0.0528836	0.035954
516	0.016255	0.0207543	0.0160811	0.0092109		0.0535436	0.0598276	0.0528836	0.035954
517	0.0144746	0.0184802	0.014321	0.00820605		0.0476756	0.0532566	0.047073	0.0320228
518	0.0152413	0.0194613	0.0150794	0.00863935		0.0502007	0.0560974	0.0495838	0.0337158
519	0.0160089	0.0204409	0.0158395	0.00907253		0.0527401	0.0589238	0.0520802	0.0354231
520	0.0166226	0.0212276	0.0164474	0.00941958		0.0547631	0.061205	0.0540888	0.0367861
521	0.016822	0.0214792	0.0166458	0.00953307		0.0554231	0.0619223	0.0547344	0.0372165
522	0.016876	0.0215501	0.0166982	0.00956299		0.0556096	0.0621375	0.0549209	0.0373456
523	0.0166092	0.0212114	0.0164369	0.00941114		0.0547344	0.0611619	0.0540601	0.0367574
524	0.0172278	0.0220054	0.017062	0.00976443		0.0568004	0.0634862	0.0561404	0.0381634
525	0.017445	0.0222906	0.0172815	0.00987929		0.0575751	0.0643613	0.0569152	0.0386369
526	0.0167176	0.0213598	0.0165499	0.00945984		0.0551648	0.0616784	0.0545048	0.0370157
527	0.015785	0.0201718	0.0156381	0.00893306		0.0521232	0.0582781	0.0515206	0.034964
528	0.0167417	0.0213978	0.0165795	0.00946698		0.0552939	0.0618362	0.0546483	0.037073
529	0.0176806	0.0226009	0.017514	0.00999766		0.0584216	0.0653226	0.0577473	0.0391677
530	0.0174667	0.0223276	0.0173031	0.00987445		0.0577186	0.0645478	0.0570586	0.0386943
531	0.0177683	0.0227146	0.0176013	0.0100441		0.0587229	0.0656813	0.0580486	0.0393686
532	0.017196	0.0219827	0.0170328	0.00971838		0.0568291	0.0635579	0.0561835	0.0380917
533	0.0167289	0.0213853	0.0165716	0.0094557		0.0552796	0.0618362	0.0546483	0.0370587
534	0.0172655	0.022068	0.0171018	0.00976237		0.0570443	0.0637874	0.0563843	0.0382495
535	0.0176777	0.0225935	0.0175106	0.010001		0.0583786	0.0652796	0.0577043	0.0391677
536	0.0178702	0.0228359	0.0177014	0.0101136		0.0590098	0.0659682	0.0583212	0.0395981
537	0.0171984	0.0219761	0.0170364	0.00973671		0.0567717	0.0634718	0.0561117	0.038106
538	0.0175235	0.0223904	0.0173621	0.00992369		0.0578477	0.0646626	0.0571878	0.0388377
539	0.0174059	0.0222405	0.0172511	0.00985982		0.0574604	0.0642322	0.0568147	0.0385938
540	0.0166975	0.0213389	0.016574	0.00947207		0.0551505	0.0616497	0.0545909	0.037073
541	0.0167663	0.0214412	0.0167076	0.00953682		0.0554661	0.0620514	0.0550787	0.0373743
542	0.0173113	0.0221426	0.017256	0.00984426		0.0573025	0.0641174	0.0569152	0.0385938
543	0.0172493	0.0220483	0.0171276	0.00978209		0.0570012	0.0637444	0.0564417	0.0383213
544	0.0175224	0.0224112	0.0174528	0.00995848		0.0579769	0.0648635	0.0575608	0.0390386
545	0.0175246	0.0224072	0.0174276	0.0099453		0.0579625	0.0648348	0.0574747	0.0389812
546	0.0175613	0.0224694	0.0175216	0.00998929		0.0581634	0.0651074	0.057819	0.0391821
547	0.0176481	0.0225696	0.0175519	0.0100139		0.0583786	0.0653226	0.0578908	0.0392682
548	0.017493	0.0223662	0.0173723	0.00991464		0.0578477	0.0646913	0.0572882	0.0388664
549	0.0176028	0.0225015	0.0174663	0.00997284		0.0581777	0.06505	0.0575751	0.0390816
550	0.0178663	0.0228345	0.0177282	0.0101256		0.0590242	0.0659969	0.0584216	0.0396699
551	0.017704	0.0226241	0.0175588	0.0100343		0.0584647	0.0653656	0.0578477	0.0392969
552	0.0178705	0.0228348	0.0177169	0.0101245		0.0590098	0.0659682	0.0583642	0.0396555
553	0.0175803	0.0224658	0.0174289	0.00995752		0.0580629	0.0649065	0.0574317	0.0390099
554	0.0180413	0.0230564	0.0178832	0.010218		0.0595837	0.0666138	0.0589238	0.0400286
555	0.0181146	0.0231505	0.0179585	0.0102581		0.0598276	0.0668864	0.059182	0.0401864
556	0.0179137	0.0228944	0.0177594	0.0101432		0.059182	0.0661547	0.058522	0.0397416
557	0.017391	0.0222279	0.0172422	0.00984565		0.0574604	0.0642466	0.0568291	0.0385795
558	0.0172924	0.0221047	0.017146	0.00978404		0.0571591	0.0639166	0.0565421	0.0383643
559	0.0170077	0.0217431	0.016865	0.00961989		0.0562408	0.0628979	0.0556383	0.037733
560	0.0172608	0.022069	0.0171162	0.00976253		0.0570873	0.0638448	0.0564704	0.0383069
561	0.0175268	0.0224113	0.0173844	0.00991079		0.0579912	0.0648491	0.0573743	0.0388951
562	0.0174375	0.0223028	0.0172972	0.00985691		0.0577186	0.0645622	0.0571017	0.0387086
563	0.0179496	0.022961	0.0178087	0.0101414		0.0594403	0.0664991	0.0588233	0.0398564
564	0.0174896	0.0223787	0.017354	0.00987559		0.0579482	0.0648491	0.0573456	0.0388234
565	0.0173798	0.0222384	0.0172461	0.00981124		0.0576038	0.0644618	0.0570012	0.0385795
566	0.0171699	0.0219722	0.0170408	0.00969368		0.0569152	0.0637014	0.0563413	0.0381347
567	0.0175196	0.0224256	0.0174005	0.00989119		0.058106	0.06505	0.0575464	0.0389238
568	0.0173071	0.0221756	0.0172615	0.00979186		0.0575464	0.0644761	0.0571734	0.0385938
569	0.0166995	0.0214458	0.0168485	0.00951831		0.0558104	0.0626827	0.0559683	0.0376326
570	0.0168513	0.0216232	0.0169043	0.00955932		0.0562122	0.0630844	0.0561117	0.0377761
571	0.0169399	0.0217104	0.0168649	0.00955094		0.05637	0.0631705	0.0559252	0.0377043
572	0.017268	0.0221627	0.0172905	0.00976753		0.0576325	0.064677	0.057446	0.0386369
573	0.0175238	0.0224874	0.0175265	0.0099		0.058479	0.0656095	0.0582208	0.0391534
574	0.0175316	0.0224975	0.0175151	0.00989156		0.0584933	0.0656382	0.0582064	0.039139
575	0.0172347	0.0221214	0.0172246	0.00972096		0.0575321	0.0645765	0.0572595	0.0384791
576	0.0171384	0.0219942	0.0171061	0.00965451		0.0571878	0.0641748	0.0568578	0.0382065
577	0.0173694	0.0222848	0.0173207	0.00978006		0.0579338	0.0649926	0.0575608	0.0386943
578	0.0171874	0.0220382	0.017096	0.00966529		0.0572451	0.0641892	0.0567573	0.0382065
579	0.0172999	0.0221698	0.0171858	0.00973058		0.0575464	0.0644905	0.0570012	0.0384073
580	0.0176436	0.0225947	0.0175247	0.00994447		0.0585794	0.0656095	0.0580199	0.0391821
581	0.017764	0.022736	0.0176384	0.0100276		0.0589094	0.0659395	0.0583212	0.0394547
582	0.0181183	0.0231806	0.0179966	0.0102474		0.0600141	0.067159	0.0594403	0.0402725
583	0.0181912	0.0232635	0.018069	0.0103032		0.0602007	0.0673455	0.0596268	0.0404446
584	0.0183554	0.0234695	0.0182462	0.0104107		0.0607172	0.0679194	0.060172	0.0408463
585	0.0179185	0.0229103	0.0178174	0.0101696		0.0592681	0.0662839	0.0587516	0.0398851
586	0.017521	0.0224103	0.0174605	0.00996294		0.0579912	0.0648778	0.0575895	0.0390816
587	0.0178009	0.0227899	0.0178354	0.0101595		0.0590672	0.0661404	0.0588951	0.0398994
588	0.0169328	0.0217634	0.0173278	0.00980882		0.0566856	0.0637157	0.0574747	0.0387086
589	0.0144546	0.0186844	0.0152432	0.00852586		0.0489812	0.05538	0.0509898	0.0339454
590	0.0151438	0.0195736	0.0159613	0.00893135		0.0513198	0.0580199	0.0533714	0.0355522
591	0.0163427	0.0210693	0.0169878	0.00956553		0.0550787	0.0621088	0.0565565	0.0379052
592	0.0160527	0.0207153	0.0167813	0.00941956		0.0542036	0.0611763	0.0559969	0.037403
593	0.0166449	0.0214157	0.0171391	0.00967082		0.0558391	0.0628405	0.0569726	0.0382495
594	0.0165071	0.0212512	0.0170623	0.0096168		0.0554374	0.0624245	0.0567717	0.0380773
595	0.0158993	0.0205203	0.0166396	0.00933991		0.0537157	0.0606311	0.0555235	0.0371017
596	0.0170609	0.021921	0.0174241	0.00986468		0.057073	0.0641318	0.0577903	0.0389382
597	0.0168679	0.0216848	0.0172679	0.00975951		0.0564991	0.0635149	0.0573456	0.0385795
598	0.0169782	0.0218028	0.0172919	0.0097986		0.0567286	0.0637157	0.0573169	0.0386512
599	0.0171367	0.0219874	0.0173734	0.00986147		0.0571447	0.0641318	0.0575177	0.0388521
600	0.0173773	0.0222617	0.0174726	0.00994254		0.0577473	0.0647057	0.0577473	0.039096
601	0.0174087	0.0222754	0.0173858	0.00991295		0.0576899	0.0645622	0.0573743	0.0389238
602	0.017355	0.0221993	0.0172975	0.00986457		0.0574747	0.0643039	0.057073	0.038723
603	0.0177092	0.0226438	0.0176182	0.010055		0.0585938	0.0655235	0.058106	0.0394547
604	0.0180438	0.0230686	0.0179312	0.0102353		0.0596698	0.0667286	0.0591246	0.0401577
605	0.0180025	0.0230108	0.0178761	0.0102092		0.0594977	0.0665278	0.0589238	0.0400286
606	0.0179782	0.0229725	0.0178498	0.0102075		0.0593685	0.0663556	0.0587803	0.0399855
607	0.0182043	0.0232515	0.0180729	0.0103469		0.0600572	0.0671016	0.059469	0.0404877
608	0.0180428	0.0230375	0.0179122	0.0102642		0.0594833	0.0664417	0.0588951	0.040129
609	0.018106	0.0231153	0.0179728	0.0103078		0.0596555	0.0666282	0.0590672	0.0402725
610	0.0179877	0.0229604	0.0178536	0.0102436		0.0592394	0.0661547	0.0586512	0.0399999
611	0.0181156	0.0231196	0.0179788	0.0103216		0.0596411	0.0665851	0.0590385	0.0402868
612	0.0180773	0.0230691	0.0179372	0.0102999		0.0594977	0.0664273	0.0588807	0.0401864
613	0.017872	0.0228054	0.017732	0.0101839		0.058809	0.0656526	0.0581921	0.0397273
614	0.0176559	0.0225226	0.0175137	0.010066		0.0580629	0.0648061	0.0574604	0.0392395
615	0.0180737	0.0230523	0.0179279	0.0103118		0.0594116	0.0662982	0.0587803	0.040172
616	0.0175029	0.0223218	0.0173609	0.00999116		0.0575034	0.0641748	0.0569008	0.0389095
617	0.0174903	0.0223044	0.0173462	0.00998496		0.057446	0.0641031	0.0568434	0.0388664
618	0.0181861	0.0231894	0.0180355	0.0103854		0.0597272	0.0666282	0.0590816	0.0404159
619	0.0180296	0.0229866	0.0178769	0.0102964		0.0591964	0.06604	0.0585507	0.0400573
620	0.0181532	0.023146	0.0179991	0.010363		0.0596124	0.0665134	0.0589668	0.0403299
621	0.0181698	0.0231754	0.0180137	0.010359		0.0597129	0.0666425	0.0590672	0.0403442
622	0.0178405	0.0227765	0.0176852	0.010137		0.0587659	0.0656526	0.0581203	0.0395838
623	0.0174562	0.0223075	0.0173004	0.00988429		0.0576325	0.0644474	0.0569869	0.0386943
624	0.017249	0.0220313	0.017096	0.00978546		0.0568721	0.0635579	0.0562408	0.0382495
625	0.0173564	0.0221512	0.0172039	0.00987114		0.0571304	0.0638018	0.0564991	0.0385078
626	0.0176385	0.0225146	0.0175106	0.0100499		0.0580629	0.0648635	0.057489	0.0391964
627	0.017769	0.0227021	0.01773	0.0101588		0.0586368	0.0655521	0.0582781	0.0396699
628	0.0166595	0.021417	0.0167093	0.00938986		0.0557817	0.0627401	0.0556813	0.0372309
629	0.0174168	0.0222975	0.017419	0.00991889		0.0577473	0.0646913	0.0575034	0.0389238
630	0.0171748	0.0219768	0.0170944	0.00973711		0.0568721	0.0636727	0.0564274	0.0382065
631	0.0176276	0.0225033	0.0175024	0.0100405		0.0580486	0.0648491	0.057489	0.0391677
632	0.0172916	0.0220857	0.0172984	0.00993225		0.0570012	0.0637157	0.0567717	0.0387086
633	0.0179401	0.0228819	0.0178935	0.0103118		0.0589381	0.0657961	0.0585651	0.0400716
634	0.0178477	0.0227424	0.0177567	0.0102583		0.0584933	0.0652365	0.0580199	0.0397847
635	0.0181275	0.0230937	0.018051	0.0104382		0.0593829	0.0662121	0.0589381	0.0404446
636	0.0179138	0.0228143	0.0178221	0.0103176		0.0586225	0.0653513	0.058149	0.0399425
637	0.0182098	0.0231871	0.0181215	0.0104964		0.0595694	0.0663986	0.0590959	0.0406168
638	0.0184603	0.0234887	0.0183254	0.0106324		0.0602867	0.0671447	0.0596842	0.0410759
639	0.0182832	0.0232569	0.0181574	0.0105436		0.0596698	0.0664417	0.0590959	0.0407029
640	0.0181503	0.0230786	0.0180176	0.0104758		0.0591677	0.0658678	0.0585938	0.0404016
641	0.0181599	0.0230885	0.0180364	0.0104953		0.059182	0.0658678	0.0586081	0.0404446
642	0.0181192	0.0230293	0.0179819	0.0104722		0.0589955	0.0656382	0.0583929	0.0403299
643	0.0183368	0.0233117	0.0182368	0.0106194		0.0597416	0.0664847	0.0592251	0.0408894
644	0.0183204	0.0232832	0.0182073	0.0106121		0.0596268	0.0663556	0.0590959	0.040832
645	0.0182882	0.023256	0.0182468	0.0106275		0.0596124	0.0663699	0.0592537	0.0409181
646	0.0175914	0.0224212	0.0177913	0.0103251		0.0576612	0.064347	0.0579195	0.0398564
647	0.0170103	0.0217575	0.0175243	0.0101014		0.0562122	0.062941	0.0573456	0.0392108
648	0.0169101	0.0216483	0.017537	0.0101009		0.0559969	0.0627545	0.0574173	0.0392108
649	0.0166596	0.0213162	0.01724	0.0099294		0.0551074	0.0617358	0.0564417	0.0385508
650	0.0172696	0.0219996	0.0174502	0.010141		0.0565134	0.0630414	0.0567573	0.0390816
651	0.0181179	0.0230642	0.0182484	0.0106216		0.0591964	0.0659826	0.0592824	0.0408894
652	0.0166662	0.0213445	0.0173626	0.0100023		0.0552222	0.0619223	0.0568434	0.0388091
653	0.0179051	0.0227909	0.0180511	0.01051		0.0584933	0.0651935	0.0586368	0.0404446
654	0.0177562	0.0225971	0.0178811	0.0104172		0.0579769	0.0646052	0.0580486	0.0400716
655	0.0168571	0.0214976	0.0171773	0.00995962		0.0552796	0.0617358	0.0559539	0.0384504
656	0.0150513	0.0191763	0.0152565	0.00887276		0.0492825	0.0549783	0.0495981	0.0341749
657	0.0154454	0.0196784	0.01567	0.0091144		0.0505594	0.056413	0.0509324	0.0350931
658	0.0175139	0.0222764	0.0176059	0.010268		0.0571017	0.0636009	0.057116	0.0394547
659	0.0176882	0.022492	0.0177263	0.0103399		0.0576325	0.0641748	0.057489	0.0397273
660	0.0177222	0.0225403	0.0177287	0.0103267		0.057776	0.064347	0.0575464	0.0397129
661	0.0178295	0.0226837	0.0177268	0.0102991		0.0581634	0.0647918	0.0576612	0.0396986
662	0.0178377	0.0227088	0.0176732	0.0102314		0.0582925	0.0649783	0.0576325	0.0395551
663	0.0175802	0.0223686	0.0174331	0.010114		0.0573743	0.0639166	0.0567573	0.0390243
664	0.0179848	0.0228486	0.0178202	0.010391		0.0584647	0.0650357	0.0578047	0.0399281
665	0.0181199	0.022998	0.0179458	0.0104975		0.0587516	0.0653082	0.0580773	0.0402294
666	0.0182597	0.0231583	0.0180761	0.0105985		0.0590959	0.0656382	0.0583929	0.0405307
667	0.0183277	0.0232316	0.0181405	0.0106563		0.0592251	0.065753	0.058522	0.0406885
668	0.0184075	0.0233209	0.0182018	0.0107071		0.0594116	0.0659252	0.0586512	0.040832
669	0.0187242	0.0237176	0.0185189	0.0109019		0.0604015	0.0670156	0.0596411	0.0415494
670	0.0186852	0.0236651	0.018475	0.0108822		0.0602437	0.0668434	0.0594833	0.0414489
671	0.0187108	0.0236945	0.0184997	0.0109009		0.0603011	0.0669008	0.0595407	0.0415063
672	0.0185805	0.0235273	0.0183693	0.0108275		0.0598707	0.066413	0.0590959	0.0412194
673	0.0188889	0.0239153	0.0186745	0.0110121		0.0608463	0.067489	0.0600572	0.0418937
674	0.0188489	0.0238607	0.0186332	0.010992		0.0607028	0.0673168	0.0599137	0.0418076
675	0.0187052	0.0236766	0.0184905	0.0109117		0.060215	0.0667717	0.0594403	0.041492
676	0.0188584	0.0238694	0.0186417	0.011003		0.0607028	0.0673025	0.0599137	0.041822
677	0.0186936	0.0236597	0.0184786	0.0109095		0.0601576	0.0666999	0.0593829	0.0414633
678	0.0187665	0.0237502	0.0185489	0.0109532		0.0603872	0.0669438	0.0595981	0.0416211
679	0.0184886	0.0233965	0.0182753	0.010794		0.059469	0.0659395	0.0587086	0.0410042
680	0.0186637	0.0236186	0.0184493	0.0108997		0.0600285	0.0665565	0.0592537	0.0413915
681	0.0185664	0.0234937	0.0183597	0.0108493		0.0597129	0.0661978	0.0589525	0.0411907
682	0.0185683	0.0234966	0.0183689	0.0108561		0.0597129	0.0661978	0.0589812	0.0412194
683	0.0185557	0.0234801	0.0183619	0.0108528		0.0596698	0.0661547	0.0589525	0.0411907
684	0.0184766	0.0233815	0.0182955	0.0108136		0.0594259	0.0658965	0.0587373	0.0410472
685	0.0186809	0.0236361	0.0184861	0.0109315		0.0600572	0.0665708	0.0593255	0.0414776
686	0.0185805	0.0235136	0.0184006	0.0108756		0.0597559	0.0662552	0.0590672	0.0412768
687	0.0130792	0.0171607	0.0129725	0.00678458		0.0457961	0.0525106	0.0453227	0.0283069
688	0.0149975	0.0193853	0.0148439	0.00815039		0.050832	0.0574747	0.050215	0.0328263
689	0.0150467	0.0194425	0.0149043	0.008196		0.0509467	0.0575895	0.0503729	0.0329698
690	0.0156679	0.0201541	0.0155317	0.00867817		0.0524962	0.0590816	0.0519224	0.0344906
691	0.016289	0.020856	0.0162191	0.00921583		0.0539883	0.0605163	0.0535866	0.0361405
692	0.0164424	0.0210163	0.0166434	0.0095676		0.0542466	0.0607172	0.0545335	0.0371591
693	0.0154313	0.019823	0.0162895	0.00931421		0.0514489	0.0578764	0.0535866	0.0363126
694	0.0149495	0.0192108	0.0160452	0.00917514		0.0498133	0.0561117	0.0527975	0.0357101
695	0.0160285	0.0204855	0.016806	0.00973796		0.0527401	0.0590816	0.0547631	0.0375178
696	0.0160775	0.0205376	0.0168492	0.00976902		0.0528549	0.059182	0.0548779	0.0376039
697	0.017861	0.0226758	0.0180783	0.0106406		0.0579051	0.0644044	0.0582208	0.040502
698	0.0175638	0.0223039	0.0178103	0.0104784		0.0569726	0.0634001	0.0573743	0.0398994
699	0.016579	0.0211569	0.0172817	0.0100566		0.0543901	0.0608319	0.0561261	0.0386225
700	0.0163565	0.02088	0.0170859	0.00993668		0.0537014	0.0600715	0.0555235	0.0381778
701	0.0159106	0.0203741	0.0168765	0.0097661		0.0526254	0.0590385	0.0550357	0.03769
702	0.016283	0.0208041	0.0170688	0.00992314		0.0535723	0.0599711	0.0554661	0.0381491
703	0.0164392	0.0209748	0.017139	0.00997737		0.0538736	0.060258	0.0556526	0.0382926
704	0.0173622	0.0220843	0.0177918	0.010427		0.0564847	0.0629697	0.0574747	0.0398134
705	0.0171721	0.0218857	0.0177971	0.0104148		0.0561835	0.0627401	0.0575608	0.0398277
706	0.0173966	0.0221318	0.017855	0.0104794		0.0567	0.0631992	0.0576182	0.0399855
707	0.0174381	0.022181	0.0178908	0.0105102		0.0568004	0.0632996	0.0576899	0.0400716
708	0.0174967	0.0222587	0.0179593	0.0105468		0.0570156	0.0635579	0.0579195	0.0402151
709	0.0178654	0.0226657	0.0180757	0.0106673		0.057819	0.0642609	0.0580916	0.0405164
710	0.0176937	0.0224853	0.0180614	0.0106302		0.0575034	0.064017	0.058149	0.0404733
711	0.0178175	0.022617	0.0180878	0.0106646		0.0577473	0.0642179	0.0581634	0.0405307
712	0.0179259	0.0227274	0.0180833	0.0106862		0.0579051	0.0643326	0.0580486	0.0405307
713	0.0176364	0.0223865	0.0179019	0.010556		0.0571591	0.0635722	0.0575608	0.0401146
714	0.0177589	0.022535	0.0180003	0.0106215		0.057489	0.0639309	0.0578477	0.0403442
715	0.0168617	0.0214607	0.0173814	0.0102032		0.055007	0.0613341	0.056083	0.0389238
716	0.0167487	0.0213379	0.0173785	0.0101847		0.0547631	0.0611189	0.0561404	0.0388951
717	0.0125323	0.0163338	0.0146473	0.00817891		0.0430415	0.049182	0.0490099	0.0323815
718	0.0111195	0.0145926	0.0132993	0.00734866		0.0387086	0.0445623	0.0448492	0.0292682
719	0.0102193	0.0134013	0.0122499	0.00675728		0.0354805	0.0408463	0.0413772	0.0269296
720	0.010478	0.0138065	0.0128099	0.00701786		0.0367861	0.0425106	0.0434575	0.0281348
721	0.0128372	0.0166279	0.0144659	0.00818584		0.0435149	0.0494259	0.0479625	0.0320659
722	0.016002	0.0204493	0.0168587	0.00980939		0.0526828	0.0589955	0.0547487	0.0376756
723	0.014218	0.0183087	0.0155506	0.00890877		0.0475752	0.0537157	0.0510902	0.0345766
724	0.0120553	0.015673	0.0138553	0.0077811		0.041162	0.0469439	0.0461978	0.0306455
725	0.0114516	0.0149805	0.013527	0.00752367		0.0396125	0.0454374	0.0454087	0.0298277
726	0.012263	0.0159562	0.0142649	0.00798231		0.0419511	0.0478765	0.0476756	0.0315207
727	0.0128773	0.016694	0.0145795	0.00824622		0.0437014	0.0496985	0.0483643	0.0322954
728	0.0115718	0.0150815	0.0135939	0.00757509		0.0397129	0.0453944	0.0455666	0.0299856
729	0.0127542	0.0164726	0.014292	0.00811381		0.042941	0.0486512	0.0472739	0.0316929
730	0.0132702	0.0171999	0.0150985	0.00853435		0.0450357	0.0511763	0.0500716	0.0334863
731	0.0125998	0.0163474	0.0144344	0.00813204		0.042855	0.0487516	0.0480056	0.0319655
732	0.014326	0.018415	0.015646	0.00897607		0.0477186	0.0538018	0.0513485	0.0347919
733	0.0158828	0.0202913	0.0167464	0.00975039		0.0522093	0.0584647	0.0543614	0.0374174
734	0.0165509	0.0210922	0.0172246	0.0100769		0.0540744	0.0604015	0.05571	0.0385078
735	0.0160805	0.0205215	0.0168611	0.00983719		0.0527258	0.0589668	0.054634	0.0376756
736	0.0160068	0.0204464	0.0168507	0.00982206		0.052611	0.0588951	0.054634	0.0376613
737	0.0161147	0.0205771	0.0169433	0.00987969		0.0529123	0.0592107	0.0549353	0.0378621
738	0.016829	0.0213967	0.0173253	0.0102093		0.0547344	0.0609754	0.0557243	0.0387947
739	0.0165424	0.0210235	0.0170052	0.0100229		0.0537301	0.059842	0.0546914	0.0380773
740	0.0172547	0.0218809	0.0175282	0.0103718		0.055753	0.061951	0.0562122	0.0392825
741	0.0172474	0.0218493	0.0174126	0.0103262		0.0555665	0.0616928	0.0557387	0.0390386
742	0.0174626	0.0220872	0.0174874	0.0103951		0.0560543	0.0621375	0.0558822	0.0392108
743	0.0179917	0.0227464	0.0179696	0.0106899		0.0576899	0.0639166	0.0573886	0.0403012
744	0.0180798	0.0228371	0.0179682	0.010705		0.0578334	0.0640314	0.0573169	0.0403012
745	0.0182067	0.02298	0.0180165	0.010748		0.0581203	0.0642896	0.0574173	0.0404159
746	0.0183111	0.0231144	0.0181243	0.0108115		0.0584503	0.064677	0.0577616	0.0406598
747	0.0184064	0.0232282	0.0181953	0.0108578		0.0587229	0.0649496	0.0579769	0.0408177
748	0.0184068	0.0232256	0.0181846	0.0108537		0.0587086	0.0649352	0.0579338	0.0408033
749	0.0182281	0.0230009	0.0180026	0.0107474		0.0581347	0.0642896	0.0573456	0.0404016
750	0.0182448	0.0230199	0.0180173	0.0107561		0.0581777	0.0643326	0.0573886	0.0404303
751	0.0180836	0.0228151	0.0178586	0.0106629		0.0576612	0.0637588	0.0568721	0.0400716
752	0.0181904	0.0229505	0.0179616	0.0107253		0.0579912	0.0641318	0.0572021	0.0403012
753	0.0183132	0.0231036	0.0180782	0.0107959		0.0583642	0.0645478	0.0575608	0.0405594
754	0.0183752	0.0231817	0.0181407	0.0108354		0.0585651	0.0647631	0.0577616	0.0407029
755	0.0182913	0.0230749	0.0180617	0.0107872		0.0583068	0.0644761	0.0575177	0.0405307
756	0.0183206	0.0231115	0.0180815	0.010801		0.0583786	0.0645478	0.0575608	0.0405738
757	0.0183727	0.0231767	0.0181329	0.0108317		0.0585507	0.0647344	0.057733	0.0406885
758	0.0181711	0.0229225	0.0179332	0.0107096		0.0579051	0.0640314	0.0571017	0.0402294
759	0.0178598	0.0225637	0.0176251	0.0104697		0.0571447	0.0632853	0.0563413	0.0395121
760	0.00413106	0.00609688	0.00408182	0.00145299		0.017604	0.0225537	0.0173744	0.00742178
761	0.00252508	0.00393823	0.00249573	0.000744229		0.0115423	0.0155954	0.0113931	0.00405881
762	0.0100607	0.0134516	0.009932	0.00486297		0.0365996	0.0427115	0.0360974	0.0211907
763	0.00577331	0.00821203	0.00570298	0.00228375		0.0233428	0.0288665	0.0230272	0.0110889
764	0.00799918	0.0109787	0.00789881	0.00355109		0.0305164	0.0364848	0.0301003	0.0162697
765	0.0101053	0.0135151	0.00997662	0.00488157		0.0367861	0.0429267	0.0362696	0.0212912
766	0.0119366	0.0156221	0.0117837	0.00619429		0.0415924	0.0475608	0.0410042	0.0257531
767	0.01467	0.0188646	0.01448	0.00807768		0.0491247	0.0552796	0.048436	0.0321376
768	0.0166729	0.0211831	0.016455	0.00957995		0.0541605	0.0602724	0.0534001	0.0368005
769	0.0169904	0.0215292	0.0167682	0.00985578		0.0547918	0.0608463	0.0540314	0.0375465
770	0.0175323	0.0221504	0.0173026	0.0102779		0.0560974	0.0621232	0.0553226	0.0387947
771	0.017672	0.0222984	0.0174414	0.0104089		0.0563556	0.062324	0.0555665	0.0391247
772	0.0177256	0.0223565	0.0174937	0.0104554		0.0564561	0.0624245	0.055667	0.0392538
773	0.0178703	0.0225391	0.0176374	0.0105446		0.0569008	0.0629123	0.0561117	0.0395695
774	0.0178061	0.0224553	0.017575	0.010512		0.0566856	0.0626684	0.0558965	0.0394403
775	0.0176934	0.0223116	0.017463	0.0104472		0.0563126	0.0622523	0.0555378	0.0391821
776	0.0179327	0.0226116	0.0176998	0.0105895		0.057073	0.0630844	0.0562839	0.0397129
777	0.0177191	0.0223411	0.0174887	0.0104645		0.0563843	0.062324	0.0556096	0.0392395
778	0.0176309	0.0222313	0.017406	0.0104138		0.0561117	0.0620227	0.0553513	0.039053
779	0.0176675	0.0222788	0.0174421	0.0104373		0.0562408	0.0621519	0.0554661	0.039139
780	0.0175952	0.0221852	0.0173688	0.0103943		0.0559969	0.0618936	0.0552222	0.0389812
781	0.0176354	0.0222357	0.0174092	0.0104193		0.0561261	0.0620227	0.0553513	0.0390673
782	0.0177658	0.0224017	0.017539	0.0104972		0.0565278	0.0624819	0.055753	0.0393542
783	0.0174796	0.0220386	0.0172559	0.0103298		0.0556096	0.0614632	0.0548492	0.038723
784	0.0175875	0.0221721	0.0173629	0.0103945		0.0559396	0.0618219	0.0551792	0.0389525
785	0.0174154	0.0219652	0.0172414	0.0103158		0.0554661	0.0613197	0.0548205	0.0386799
786	0.0175743	0.0221759	0.0174424	0.0104301		0.05604	0.0619797	0.0554804	0.039139
787	0.0169421	0.0214449	0.0170875	0.0101555		0.0544475	0.0604015	0.0546053	0.0383069
788	0.016589	0.0210268	0.0168599	0.00999214		0.0535005	0.0594403	0.0540027	0.0377761
789	0.0164482	0.0208732	0.0168416	0.00996846		0.0532136	0.059182	0.0539883	0.0377187
790	0.0157473	0.020035	0.0163456	0.00960422		0.0512193	0.0571304	0.0526971	0.0365566
791	0.01622	0.0205812	0.0165817	0.00981537		0.0524389	0.0583212	0.0531562	0.0371304
792	0.0162102	0.0205517	0.0165	0.00978105		0.0522954	0.058106	0.0528406	0.0369583
793	0.0159169	0.0201885	0.0162436	0.00961923		0.0514059	0.0571591	0.0520515	0.03637
794	0.0167532	0.0211447	0.0166612	0.00995973		0.0534575	0.059139	0.0530127	0.0373743
795	0.0168925	0.0213514	0.0169308	0.0100954		0.0541031	0.0599424	0.053974	0.0379626
796	0.0157718	0.0200477	0.0162927	0.00960019		0.051205	0.0570586	0.0524102	0.0364561
797	0.0157369	0.02002	0.0163206	0.00960644		0.051205	0.0571017	0.0525393	0.0365279
798	0.0168033	0.0212622	0.0169462	0.0100893		0.053974	0.0598563	0.0540888	0.0379913
799	0.0166006	0.0210279	0.0168345	0.00999955		0.0534575	0.0593398	0.0538162	0.0377187
800	0.0161438	0.0204843	0.0165211	0.00978267		0.0522093	0.0580629	0.052941	0.0370013

## Sheet: 30degS
30 degrees S latitude	Daily Irradiance (mE cm-2 d-1 nm-1)					Solar Noon Irradiance (mE cm-2 d-1 nm-1)
wavelength (nm)	March 20th	June 21st	September 22nd	December 22nd		March 20th	June 21st	September 22nd	December 22nd
280	1.82066e-19	9.80579e-22	3.07581e-21	3.14178e-18		2.51219e-18	3.71161e-21	3.42754e-20	4.04303e-17
281	7.55738e-18	2.87063e-20	1.46119e-19	1.08528e-16		1.01334e-16	1.22137e-19	2.03299e-18	1.33902e-15
282	3.64123e-16	1.63256e-18	1.07295e-17	4.17703e-15		4.66713e-15	6.81059e-18	1.44332e-16	4.88951e-14
283	3.65414e-15	1.49802e-17	9.69068e-17	2.85975e-14		4.44475e-14	5.59826e-17	1.27331e-15	3.17072e-13
284	5.3152e-14	1.75365e-16	2.42368e-15	3.47251e-13		6.27401e-13	7.58247e-16	2.96412e-14	3.65279e-12
285	1.72003e-13	5.64607e-16	1.01222e-14	1.04113e-12		1.99712e-12	2.50645e-15	1.20344e-13	1.0571e-11
286	2.28486e-12	9.87822e-15	2.11098e-13	1.89032e-11		2.57244e-11	4.40745e-14	2.4591e-12	1.93543e-10
287	1.87936e-11	6.90481e-14	2.32785e-12	9.57431e-11		2.04017e-10	3.15637e-13	2.68722e-11	8.95262e-10
288	1.42038e-10	5.618e-13	1.86307e-11	6.00771e-10		1.45911e-09	3.12911e-12	1.99856e-10	5.25249e-09
289	1.02114e-09	4.36707e-12	1.58881e-10	3.87126e-09		1.0099e-08	2.63988e-11	1.63845e-09	3.23959e-08
290	6.2651e-09	3.21566e-11	1.25685e-09	2.30013e-08		5.99998e-08	2.0746e-10	1.23873e-08	1.8307e-07
291	2.03545e-08	1.26781e-10	4.66769e-09	6.55296e-08		1.85509e-07	9.27544e-10	4.45623e-08	4.98564e-07
292	8.81897e-08	8.3433e-10	2.4324e-08	2.51405e-07		7.46196e-07	6.64847e-09	2.16355e-07	1.81778e-06
293	2.07254e-07	2.64055e-09	6.37037e-08	5.47969e-07		1.64418e-06	2.2152e-08	5.34432e-07	3.86225e-06
294	4.70625e-07	1.09105e-08	1.99531e-07	1.34117e-06		3.4218e-06	9.78619e-08	1.5251e-06	9.08031e-06
295	1.17797e-06	2.65008e-08	4.76966e-07	2.67321e-06		8.53656e-06	2.24389e-07	3.60401e-06	1.70157e-05
296	3.67325e-06	1.12979e-07	1.66516e-06	7.8304e-06		2.53801e-05	9.38878e-07	1.1977e-05	4.73169e-05
297	5.05311e-06	1.97266e-07	2.47497e-06	1.0289e-05		3.36154e-05	1.60832e-06	1.71305e-05	5.97272e-05
298	1.41316e-05	7.3821e-07	7.55179e-06	2.74151e-05		8.96841e-05	5.84503e-06	4.98564e-05	0.000151793
299	2.48409e-05	1.61155e-06	1.40117e-05	4.65155e-05		0.000151936	1.24146e-05	8.92536e-05	0.000248636
300	3.26067e-05	2.8736e-06	1.96718e-05	5.87444e-05		0.000189239	2.10329e-05	0.000119354	0.000300286
301	6.15799e-05	7.07377e-06	4.21123e-05	0.000110605		0.000345049	4.94977e-05	0.000242754	0.000542753
302	6.26525e-05	7.93485e-06	4.44144e-05	0.000110131		0.00034261	5.46053e-05	0.00024964	0.00052568
303	0.000177182	2.68664e-05	0.000129336	0.000299638		0.000926826	0.000177044	0.000698563	0.00137116
304	0.000183466	3.05186e-05	0.000137113	0.000306131		0.000938878	0.000196269	0.000724101	0.00137173
305	0.00031354	6.24967e-05	0.000243572	0.00050698		0.00153228	0.00038106	0.0012274	0.00217503
306	0.000302461	6.58557e-05	0.000239762	0.000482553		0.00144189	0.000390099	0.00117876	0.00202295
307	0.000495396	0.000113754	0.000374592	0.000719409		0.00226542	0.000644474	0.00177474	0.00291391
308	0.000589394	0.000158834	0.000503542	0.000914117		0.00264562	0.000879194	0.00230272	0.00358535
309	0.000560881	0.000157651	0.000484177	0.000863857		0.00248206	0.00085839	0.0021822	0.00334145
310	0.000569869	0.0001743	0.000501435	0.000864553		0.00244762	0.00091707	0.00219225	0.0032482
311	0.00109702	0.00034745	0.000973413	0.00165476		0.00465135	0.00180057	0.00419941	0.00614058
312	0.000979011	0.000328546	0.000879626	0.00146126		0.00406024	0.00165997	0.00370874	0.00530701
313	0.00120234	0.000423085	0.00109202	0.00178049		0.00489238	0.00209038	0.00451505	0.00634862
314	0.00142301	0.000512472	0.00129867	0.00209773		0.00573456	0.00250358	0.00531419	0.00740887
315	0.00152738	0.000583254	0.00141136	0.00222873		0.00600428	0.00276613	0.00562695	0.00768434
316	0.0010958	0.000425494	0.00101609	0.00159397		0.00427545	0.00199999	0.00401864	0.00545479
317	0.00186772	0.000750378	0.00174456	0.00270335		0.00717501	0.0034634	0.00678764	0.00915348
318	0.00149172	0.000607731	0.00139731	0.00215542		0.00569295	0.00278335	0.00539883	0.00725823
319	0.00202141	0.000880867	0.00191769	0.00289519		0.00746769	0.0038766	0.0071578	0.00950356
320	0.00210537	0.000881048	0.00198345	0.00303207		0.00793254	0.0039756	0.00755808	0.0101033
321	0.00215308	0.000959789	0.0020157	0.00300228		0.00784502	0.00410759	0.00734718	0.00965707
322	0.00226952	0.000995686	0.00215821	0.00324913		0.00835435	0.00436871	0.00802149	0.0106226
323	0.00189543	0.000856898	0.00181127	0.00270268		0.00688233	0.00368865	0.00662121	0.0087159
324	0.0026009	0.00120928	0.00251479	0.00367492		0.00931561	0.00511046	0.00904732	0.0115552
325	0.0023822	0.00108318	0.00228088	0.003395		0.00862694	0.00464704	0.00831418	0.010911
326	0.00358279	0.00167268	0.00346794	0.0050579		0.012802	0.0070545	0.0124447	0.015868
327	0.00354139	0.00167108	0.00343746	0.00499224		0.0125825	0.00699854	0.0122582	0.0155667
328	0.00316796	0.00145326	0.00305475	0.00448518		0.0114218	0.00620658	0.011066	0.014185
329	0.00377129	0.00181098	0.00367371	0.00529959		0.0132726	0.00749495	0.012967	0.0163701
330	0.00432074	0.00207794	0.00421131	0.00606952		0.0151936	0.00859251	0.0148493	0.018723
331	0.00362081	0.00170689	0.00351386	0.00510303		0.0128665	0.00716353	0.0125322	0.015911
332	0.00385603	0.00186981	0.00376407	0.00540791		0.0134935	0.00769151	0.0132051	0.016614
333	0.00379443	0.0018463	0.00370732	0.00531932		0.0132525	0.00757673	0.0129784	0.0162984
334	0.00358753	0.00172196	0.00349458	0.00503872		0.0126212	0.00714058	0.0123314	0.0155523
335	0.00395723	0.00194327	0.00372028	0.00556092		0.0137733	0.00794115	0.0129569	0.0169727
336	0.00306481	0.00150545	0.00301795	0.00430256		0.0106614	0.00614632	0.0105093	0.0131219
337	0.00299887	0.00145872	0.00292922	0.0042014		0.0104706	0.00599568	0.0102525	0.012868
338	0.00376692	0.00177427	0.00353542	0.00505357		0.0130946	0.00724388	0.0123027	0.0153945
339	0.00410447	0.00201812	0.00403646	0.00575665		0.0142654	0.00823096	0.014043	0.0175466
340	0.00486591	0.00239524	0.00458089	0.00682636		0.0169009	0.00978476	0.0159253	0.0207747
341	0.00409978	0.00201819	0.00403182	0.00574654		0.0142367	0.00822953	0.0140143	0.0174892
342	0.00450665	0.00222021	0.00442708	0.00631155		0.0156384	0.00904158	0.0153801	0.0191965
343	0.00465798	0.00229629	0.00457752	0.00652194		0.0161549	0.00935291	0.0158966	0.0198278
344	0.00336308	0.00165824	0.00331241	0.00471132		0.0116671	0.00676899	0.0115035	0.0143199
345	0.00435039	0.00214665	0.00427436	0.00608691		0.0150789	0.00874172	0.014835	0.0184935
346	0.00378161	0.00186813	0.00371391	0.0052879		0.0130946	0.00759969	0.0128737	0.0160545
347	0.00460619	0.00227655	0.00452428	0.00644042		0.0159397	0.00926252	0.0156814	0.0195408
348	0.00425444	0.00210422	0.00417716	0.00594634		0.0147202	0.00855664	0.0144619	0.0180344
349	0.00395409	0.00195745	0.00388178	0.00552441		0.0136714	0.00795406	0.0134361	0.0167431
350	0.00485903	0.00240765	0.00477001	0.00678451		0.0167862	0.00978046	0.0164992	0.0205451
351	0.00458294	0.00227059	0.00449926	0.00639884		0.0158393	0.00922666	0.0155667	0.019383
352	0.00480021	0.0023795	0.00471324	0.00670099		0.0165853	0.00966998	0.0162984	0.0202869
353	0.00472946	0.00234699	0.00464232	0.00659898		0.0163271	0.00952938	0.0160401	0.0199569
354	0.00523953	0.00260034	0.00514399	0.00731131		0.0180774	0.0105566	0.0177761	0.022109
355	0.00531753	0.00263979	0.0052189	0.00741731		0.01835	0.0107159	0.01802	0.0224246
356	0.00505246	0.00251152	0.00495875	0.00704383		0.0174174	0.0101879	0.0171162	0.0212768
357	0.00356759	0.00177347	0.00350234	0.00497449		0.0122969	0.0071951	0.0120846	0.0150215
358	0.00347279	0.00172743	0.00340918	0.0048415		0.0119655	0.00700572	0.0117589	0.0146198
359	0.00416744	0.00207429	0.00409149	0.00580886		0.0143472	0.00841174	0.0141061	0.0175322
360	0.00564654	0.002811	0.0055435	0.00786958		0.0194404	0.0113988	0.0191104	0.0237445
361	0.00411857	0.00205132	0.00404358	0.00573842		0.0141764	0.00831561	0.0139325	0.0173027
362	0.00411183	0.00205087	0.0040366	0.00572562		0.0141406	0.00830844	0.0138952	0.0172453
363	0.00512064	0.00255659	0.00502628	0.00712689		0.0175896	0.0103515	0.0172883	0.021449
364	0.00578303	0.00288979	0.00567734	0.00804531		0.0198565	0.0116972	0.0195121	0.0242036
365	0.00503821	0.00251784	0.00494577	0.00700828		0.0173027	0.0101908	0.0170014	0.021076
366	0.00671923	0.0033608	0.0065946	0.00934412		0.0230559	0.0135968	0.0226542	0.0280917
367	0.00616295	0.00308531	0.00605033	0.00856862		0.0211334	0.0124777	0.0207747	0.0257388
368	0.0056007	0.00280451	0.00549941	0.00778705		0.0192108	0.0113414	0.0188809	0.0233859
369	0.00612754	0.00307055	0.00601479	0.00851534		0.0210042	0.0124117	0.0206312	0.0255523
370	0.00698776	0.00350478	0.00685915	0.00970782		0.0239311	0.0141606	0.023515	0.0291247
371	0.00581643	0.00291984	0.00570974	0.008078		0.0199139	0.0117919	0.0195695	0.024218
372	0.00483371	0.0024268	0.00474502	0.00671296		0.0165423	0.00980054	0.0162553	0.0201147
373	0.00591648	0.00297307	0.00580809	0.00821423		0.0202295	0.0120014	0.0198852	0.0246054
374	0.00561064	0.00282127	0.00550729	0.00778646		0.0191821	0.0113845	0.0188522	0.0233141
375	0.00453015	0.00227974	0.00444692	0.00628531		0.0154806	0.00919509	0.015208	0.0188091
376	0.00561157	0.0028243	0.00551008	0.00778745		0.0191678	0.0113916	0.0188522	0.0232998
377	0.00617852	0.00311147	0.00606531	0.00857069		0.0211047	0.0125452	0.0207316	0.025624
378	0.00786745	0.00396534	0.00772354	0.0109099		0.0268579	0.0159827	0.0263844	0.0326111
379	0.00615242	0.00310142	0.00603994	0.00853181		0.0209899	0.0124992	0.0206312	0.0254949
380	0.00585043	0.00294889	0.0057439	0.00811293		0.0199712	0.0118837	0.0196269	0.0242467
381	0.00712681	0.00359538	0.00699692	0.00987881		0.0243041	0.0144763	0.023888	0.0294977
382	0.00503067	0.00254089	0.00493964	0.00697217		0.0171448	0.0102295	0.0168579	0.0208034
383	0.00398327	0.00201371	0.00391054	0.00551778		0.0135652	0.00810327	0.0133314	0.0164562
384	0.00423898	0.00214394	0.00416157	0.0058704		0.0144332	0.00862407	0.0141836	0.0175035
385	0.00619876	0.00313713	0.00608589	0.00858353		0.0210903	0.0126155	0.0207316	0.0255666
386	0.00496251	0.002514	0.00487208	0.00687076		0.0168723	0.0101047	0.0165853	0.020459
387	0.0054356	0.00275493	0.0053357	0.00752096		0.0184791	0.0110674	0.0181492	0.0223816
388	0.00565033	0.00286596	0.00554851	0.00781907		0.0191965	0.0115107	0.0188665	0.0232567
389	0.00604591	0.00306845	0.00593631	0.00836373		0.0205308	0.0123199	0.0201864	0.0248636
390	0.00737165	0.00374347	0.0072376	0.010196		0.0250214	0.0150215	0.024591	0.0303012
391	0.00801023	0.00407057	0.00786486	0.0110742		0.0271879	0.0163271	0.0267144	0.032898
392	0.00689466	0.00350399	0.00676896	0.00952968		0.0233859	0.0140545	0.0229841	0.0283069
393	0.00344896	0.00175479	0.00338602	0.00476581		0.0116915	0.00703441	0.0114906	0.0141434
394	0.00511641	0.00260552	0.00502402	0.00706923		0.0173314	0.0104404	0.0170444	0.0209612
395	0.00795731	0.00405355	0.00781137	0.0109906		0.026944	0.016241	0.0264848	0.0325824
396	0.00701993	0.00357684	0.00689305	0.00969483		0.0237732	0.0143256	0.0233715	0.0287374
397	0.0030932	0.0015779	0.0030367	0.00427025		0.0104662	0.00631562	0.0102855	0.0126485
398	0.00881763	0.0044979	0.00865731	0.0121748		0.0298421	0.0180057	0.0293256	0.0360687
399	0.00990712	0.00505928	0.00972745	0.0136735		0.0335006	0.0202438	0.0329267	0.0404733
400	0.0102645	0.00524182	0.0100798	0.0141685		0.0347058	0.0209612	0.0341175	0.0419367
401	0.0105623	0.00538706	0.0103691	0.0145788		0.0357388	0.0215638	0.0351218	0.0431706
402	0.0111873	0.00571167	0.010983	0.0154356		0.0378191	0.022855	0.0371735	0.0456813
403	0.0106661	0.0054514	0.0104714	0.0147131		0.0360401	0.0218077	0.0354231	0.0435149
404	0.0105183	0.00537697	0.0103263	0.0145064		0.0355236	0.0215064	0.034921	0.042898
405	0.0105352	0.00538722	0.0103432	0.0145298		0.0355809	0.0215351	0.034964	0.0429554
406	0.0104051	0.00532633	0.0102179	0.014346		0.0351218	0.0212768	0.0345193	0.0423671
407	0.0102797	0.00526811	0.0100911	0.0141655		0.0346627	0.0210329	0.0340745	0.0418076
408	0.0106811	0.00547225	0.0104876	0.0147236		0.0360257	0.0218507	0.0354088	0.0434719
409	0.0114589	0.00587288	0.0112504	0.01579		0.0386369	0.0234433	0.0379769	0.0465996
410	0.0100363	0.00514745	0.00985486	0.0138283		0.0338306	0.0205451	0.0332424	0.040789
411	0.0109035	0.0055959	0.0107053	0.0150193		0.0367287	0.0223242	0.0360974	0.0442897
412	0.0117552	0.00604031	0.0115421	0.0161866		0.0395695	0.0240745	0.0388951	0.0476899
413	0.0114602	0.0058861	0.0112524	0.0157826		0.0385795	0.0234719	0.0379195	0.0465135
414	0.0116415	0.00598499	0.0114315	0.016027		0.0391677	0.023845	0.0385078	0.0472021
415	0.0117124	0.00602524	0.0114986	0.0161192		0.0393829	0.0239884	0.0387086	0.047446
416	0.0119679	0.00616396	0.0117495	0.0164648		0.0402151	0.0245336	0.0395264	0.0484216
417	0.0116977	0.00602669	0.0114851	0.0160918		0.0392969	0.0239741	0.0386225	0.0473169
418	0.0115033	0.00592856	0.0112952	0.0158228		0.0386369	0.0235867	0.0379769	0.0465135
419	0.0116811	0.0060232	0.011469	0.0160644		0.0392108	0.0239454	0.0385508	0.0472021
420	0.0116521	0.00601073	0.0114413	0.0160254		0.0391103	0.023888	0.0384504	0.047073
421	0.0122251	0.00630791	0.0120027	0.0168078		0.0410185	0.0250645	0.0403155	0.0493542
422	0.0116455	0.00601165	0.0114334	0.0160091		0.0390673	0.023888	0.038393	0.0470013
423	0.0114083	0.00589242	0.0112006	0.0156795		0.0382495	0.0234002	0.0375895	0.0460113
424	0.0120887	0.00624557	0.0118706	0.0166147		0.0405307	0.0248062	0.039842	0.0487516
425	0.0121104	0.00626079	0.0118898	0.016639		0.0405738	0.0248493	0.0398851	0.0487947
426	0.0118488	0.0061334	0.0116313	0.0162706		0.0396555	0.0243184	0.0389812	0.0476756
427	0.0116415	0.00602817	0.0114298	0.0159883		0.0389669	0.0239024	0.0382926	0.0468435
428	0.0113516	0.00587793	0.0111459	0.01559		0.0379913	0.0232998	0.0373456	0.045667
429	0.0107999	0.00560002	0.0106025	0.0148248		0.0361118	0.0221807	0.0354949	0.0433858
430	0.00947451	0.00491583	0.00930325	0.0130044		0.0316642	0.0194691	0.0311333	0.0380487
431	0.00939466	0.00487128	0.00922456	0.0128966		0.0314059	0.0192969	0.0308751	0.0377474
432	0.0121832	0.00632455	0.0119603	0.0167163		0.0407029	0.0250358	0.0399999	0.0488808
433	0.0122822	0.00637946	0.0120579	0.0168497		0.0410185	0.0252366	0.0403155	0.0492538
434	0.0114168	0.0059301	0.0112083	0.0156636		0.0381347	0.0234576	0.0374748	0.0457818
435	0.0119305	0.00619428	0.0117148	0.0163717		0.0398564	0.0245049	0.0391677	0.0478621
436	0.0134944	0.00701364	0.0132498	0.01851		0.0450357	0.027733	0.0442753	0.0540744
437	0.0133699	0.0069585	0.0131254	0.0183287		0.0445766	0.0274891	0.0438162	0.0534862
438	0.0122167	0.00636289	0.0119929	0.0167404		0.0407172	0.0251219	0.0400142	0.0488377
439	0.0126057	0.00655483	0.012378	0.0172892		0.0420515	0.025911	0.0413485	0.0504876
440	0.0130594	0.0067955	0.0128207	0.017902		0.0435436	0.0268435	0.0427976	0.052238
441	0.0136054	0.00709134	0.0133547	0.0186402		0.0453227	0.0279913	0.0445336	0.054347
442	0.0146361	0.00763138	0.0143567	0.020037		0.0487373	0.0301147	0.0478621	0.0584073
443	0.0142692	0.0074367	0.0139699	0.0195037		0.0475321	0.0293543	0.0466139	0.0568865
444	0.0145993	0.00761207	0.0143171	0.0199834		0.0486082	0.0300286	0.047733	0.0582494
445	0.0142815	0.00744192	0.0140021	0.0195458		0.0475752	0.0293686	0.0467143	0.0570012
446	0.0136953	0.0071488	0.0134261	0.0187337		0.0455666	0.0281778	0.0447344	0.0545766
447	0.0148518	0.00775854	0.0145724	0.0203247		0.0493829	0.0305738	0.0485077	0.0591533
448	0.0150543	0.00785453	0.0147795	0.0206223		0.0501003	0.0309755	0.0492394	0.0600715
449	0.0152016	0.00794428	0.0149208	0.0208073		0.0505307	0.0312911	0.0496555	0.0605306
450	0.0156835	0.00820463	0.0153939	0.0214617		0.0520945	0.0322954	0.0511906	0.0623958
451	0.0162988	0.00852763	0.015998	0.0223015		0.0541318	0.033558	0.0531992	0.0648348
452	0.0157353	0.0082366	0.0154463	0.0215305		0.0522523	0.0324102	0.0513485	0.0625679
453	0.0148332	0.00776649	0.0145601	0.020293		0.0492394	0.0305451	0.048393	0.0589525
454	0.0155348	0.00814199	0.0152495	0.0212456		0.051535	0.0320085	0.0506455	0.0616928
455	0.015651	0.00820149	0.0153624	0.0214051		0.0519224	0.0322381	0.0510185	0.0621519
456	0.0160701	0.00842606	0.0157724	0.0219747		0.0532853	0.0331132	0.0523671	0.0637874
457	0.0163847	0.00859238	0.016081	0.0224028		0.0543183	0.0337589	0.0533858	0.065007
458	0.0158334	0.00829577	0.0155426	0.0216561		0.0525249	0.0326111	0.0516211	0.0628836
459	0.0158092	0.00828748	0.0155138	0.0216143		0.0524245	0.032568	0.0515063	0.0627258
460	0.0158805	0.00832268	0.0155849	0.0217131		0.0526684	0.0327115	0.0517502	0.0630271
461	0.0162838	0.00853644	0.015979	0.0222634		0.0539883	0.033558	0.0530558	0.0646196
462	0.016465	0.00863986	0.0161543	0.022501		0.0545622	0.033931	0.053601	0.0652652
463	0.0163383	0.00856651	0.0160335	0.0223373		0.0541605	0.0336584	0.0532279	0.0648204
464	0.0161166	0.00846124	0.015817	0.0220274		0.0533858	0.0332137	0.0524675	0.0638735
465	0.0159738	0.00839643	0.0156755	0.0218207		0.0528549	0.0329267	0.0519367	0.0632136
466	0.0161833	0.00851478	0.015881	0.0220996		0.0535149	0.0333715	0.0525823	0.063974
467	0.0158861	0.00835239	0.0155898	0.0217013		0.052568	0.0327546	0.0516498	0.0628549
468	0.0161218	0.00847833	0.0158189	0.0220175		0.0533284	0.0332424	0.0523958	0.0637588
469	0.0162641	0.00855622	0.0159537	0.0222025		0.0537875	0.0335436	0.0528262	0.0642753
470	0.01578	0.00830107	0.0154682	0.0215291		0.0521806	0.0325393	0.0512337	0.0623384
471	0.0157982	0.00831358	0.015493	0.0215615		0.052238	0.0325824	0.0513054	0.0624101
472	0.0166753	0.00877477	0.0163544	0.0227599		0.0551361	0.0343901	0.0541462	0.0658821
473	0.0164952	0.00868112	0.0161787	0.0225146		0.0545335	0.0340171	0.0535723	0.0651648
474	0.0165182	0.00868275	0.016208	0.022563		0.0546627	0.0340458	0.0537014	0.0653513
475	0.0167124	0.00878252	0.0164008	0.0228343		0.0553083	0.0344475	0.054347	0.0661547
476	0.0162864	0.0085567	0.0159806	0.0222516		0.0539166	0.0335723	0.0529697	0.0644761
477	0.0163866	0.00860559	0.0160778	0.0223892		0.0542466	0.0337732	0.0532997	0.0648778
478	0.016881	0.00886743	0.0165596	0.0230589		0.0558678	0.0347919	0.0548922	0.0668147
479	0.0168018	0.00882627	0.0164796	0.0229478		0.0555952	0.034634	0.0546196	0.0664704
480	0.016857	0.0088566	0.016532	0.0230203		0.0557674	0.0347488	0.0547774	0.0666712
481	0.0172207	0.00905392	0.0168851	0.0235064		0.0569439	0.0355092	0.0559252	0.0680342
482	0.0173584	0.00913556	0.017018	0.0236851		0.0573599	0.0357962	0.0563269	0.0685077
483	0.0171988	0.00906182	0.0168633	0.0234606		0.056786	0.0354805	0.0557674	0.0678047
484	0.0168788	0.00889766	0.0165488	0.0230205		0.05571	0.0348205	0.0547057	0.0665134
485	0.0161003	0.00849135	0.0157794	0.0219475		0.0531275	0.033228	0.0521519	0.0634001
486	0.0140991	0.00744103	0.0138192	0.0192178		0.0464991	0.029096	0.0456526	0.0554948
487	0.0148116	0.00782303	0.014521	0.0201874		0.0488234	0.0305738	0.0479482	0.0582638
488	0.0162596	0.0085827	0.0159401	0.0221639		0.0536153	0.033558	0.0526397	0.0639883
489	0.016319	0.00860823	0.0159976	0.0222499		0.0538449	0.0336728	0.0528693	0.0642609
490	0.0172355	0.00909886	0.0168968	0.0234929		0.0568291	0.0355666	0.0557961	0.0678047
491	0.0170035	0.00898447	0.0166681	0.0231704		0.0560256	0.0350931	0.055007	0.066829
492	0.0160894	0.00850226	0.0157736	0.0219248		0.0530127	0.0332137	0.0520515	0.0632423
493	0.0166455	0.00879692	0.0163192	0.0226842		0.0548348	0.0343614	0.0538449	0.065423
494	0.0168306	0.00889231	0.0165004	0.0229374		0.0554518	0.0347345	0.0544475	0.0661547
495	0.0170049	0.00898547	0.0166725	0.0231749		0.0560113	0.0350931	0.055007	0.066829
496	0.0171431	0.0090591	0.016808	0.0233629		0.0564704	0.0353801	0.0554661	0.0673742
497	0.0174672	0.00923164	0.0171215	0.0237984		0.0575321	0.0360544	0.0564847	0.0686224
498	0.0167104	0.00883327	0.0163783	0.0227619		0.0550213	0.0344906	0.054017	0.0656095
499	0.0169766	0.00897303	0.0166353	0.0231227		0.0558965	0.0350501	0.0548779	0.0666569
500	0.0165281	0.00873326	0.0161904	0.022509		0.0544331	0.0341175	0.0534145	0.0649065
501	0.0162567	0.00858363	0.0159187	0.0221369		0.0535579	0.033558	0.0525536	0.0638592
502	0.0160498	0.00846241	0.0156877	0.0218299		0.0529267	0.0331132	0.0518506	0.0630557
503	0.0167283	0.00880688	0.016313	0.0227152		0.0552222	0.0345049	0.0540027	0.0656956
504	0.0162958	0.00854573	0.0156834	0.0218936		0.0539453	0.0335867	0.0521949	0.0636583
505	0.0169447	0.00891205	0.0165216	0.023014		0.0559683	0.0349497	0.0547344	0.0665995
506	0.0175433	0.00922909	0.017061	0.0237725		0.0579338	0.0361835	0.0565421	0.0688233
507	0.0167295	0.00880358	0.0162485	0.02264		0.0552365	0.0345049	0.0538449	0.0655521
508	0.0162427	0.008557	0.0158034	0.0220082		0.0535866	0.033515	0.0523097	0.063644
509	0.0167192	0.00881327	0.0162963	0.0226852		0.0551361	0.0344906	0.0539023	0.0655521
510	0.0166548	0.00878513	0.0162565	0.022621		0.0549066	0.0343614	0.0537301	0.0653226
511	0.0171466	0.00905295	0.0167698	0.0233261		0.0564847	0.0353944	0.0553657	0.0672882
512	0.0173754	0.00917833	0.0170072	0.0236524		0.0572165	0.0358679	0.0561261	0.068192
513	0.0164951	0.0087164	0.0161487	0.0224544		0.054304	0.0340601	0.053271	0.06472
514	0.016424	0.00868332	0.0160822	0.0223596		0.0540457	0.0339167	0.0530414	0.0644187
515	0.0163006	0.00861758	0.0159601	0.0221886		0.053644	0.0336584	0.0526254	0.0639166
516	0.0163005	0.00861737	0.0159587	0.0221885		0.053644	0.0336584	0.0526254	0.0639166
517	0.014517	0.00767602	0.0142115	0.0197577		0.0477617	0.0299712	0.0468578	0.0569008
518	0.0152865	0.00808221	0.0149657	0.0208066		0.0503011	0.0315637	0.0493399	0.0599281
519	0.0160565	0.00848582	0.0157178	0.0218546		0.0528406	0.0331419	0.0518363	0.0629553
520	0.0166725	0.008811	0.0163211	0.0226967		0.0548779	0.0344188	0.0538305	0.0653943
521	0.016874	0.00891712	0.0165172	0.0229683		0.0555235	0.0348349	0.0544761	0.0661691
522	0.016929	0.0089439	0.0165688	0.0230442		0.0557243	0.0349497	0.0546483	0.0663986
523	0.016664	0.00880308	0.0163078	0.022683		0.0548492	0.0344045	0.0538018	0.0653656
524	0.0172978	0.00913146	0.0169141	0.0235319		0.0569582	0.0357101	0.0558248	0.0678477
525	0.0175211	0.00923853	0.0171275	0.0238399		0.057733	0.0361548	0.0565852	0.0687803
526	0.0167814	0.00884619	0.0164138	0.0228476		0.0553083	0.034634	0.0542179	0.0659252
527	0.0158569	0.00835255	0.0154969	0.021578		0.052281	0.0327115	0.0512193	0.062281
528	0.0168107	0.00885142	0.016438	0.0228918		0.0554374	0.0346914	0.054347	0.0660973
529	0.0177608	0.00934662	0.0173581	0.0241783		0.0585938	0.0366426	0.0574173	0.0698276
530	0.0175468	0.00923125	0.01715	0.0238895		0.0578908	0.0361979	0.0567286	0.0690098
531	0.0178506	0.00938917	0.0174452	0.0243046		0.0588951	0.0368291	0.0577186	0.070215
532	0.0172748	0.00908453	0.0168839	0.0235235		0.0570012	0.0356383	0.0558535	0.0679625
533	0.0168051	0.00883839	0.0164247	0.0228833		0.0554518	0.0346627	0.0543327	0.0660973
534	0.0173457	0.00912632	0.0169515	0.0236159		0.0572165	0.0357818	0.0560687	0.068192
535	0.0177602	0.00934902	0.0173571	0.024177		0.0585651	0.0366426	0.0573886	0.0697846
536	0.0179534	0.00945425	0.0175451	0.0244369		0.059182	0.0370444	0.0579912	0.0705306
537	0.017278	0.00910124	0.0168862	0.0235162		0.0569439	0.0356527	0.0557961	0.0678477
538	0.0176092	0.00927619	0.0172061	0.0239615		0.0580342	0.036327	0.0568578	0.0691389
539	0.0174964	0.00921689	0.0170886	0.0237994		0.0576612	0.0360974	0.0564704	0.0686655
540	0.0168094	0.00885305	0.0163939	0.0228354		0.0553944	0.0346771	0.0542036	0.0659108
541	0.0169455	0.00891518	0.0164615	0.0229477		0.0558965	0.0349497	0.0545192	0.0663556
542	0.0175019	0.00920102	0.0169961	0.0237001		0.0577616	0.0360974	0.0563126	0.0685507
543	0.017373	0.00914199	0.0169354	0.0235984		0.0572882	0.0358392	0.0560256	0.068149
544	0.017702	0.0093066	0.0172046	0.0239876		0.0584073	0.0365135	0.0569869	0.0693685
545	0.0176774	0.00929464	0.0172049	0.023985		0.0583212	0.0364561	0.0569582	0.0693255
546	0.0177745	0.00933547	0.0172406	0.02405		0.0586799	0.036657	0.0571734	0.0696124
547	0.017805	0.009358	0.0173277	0.0241587		0.0587516	0.0367144	0.0573886	0.0698419
548	0.0176228	0.00926414	0.0171752	0.0239425		0.0581347	0.0363413	0.0568434	0.069182
549	0.0177183	0.00932009	0.0172819	0.0240886		0.058436	0.0365422	0.0571734	0.0695694
550	0.0179845	0.00946282	0.0175419	0.0244447		0.0592968	0.0371017	0.0580199	0.0705737
551	0.0178134	0.00937556	0.0173822	0.0242202		0.0587086	0.0367431	0.0574604	0.0698993
552	0.017974	0.00946035	0.0175449	0.0244466		0.0592394	0.037073	0.0580055	0.070545
553	0.0176822	0.00930403	0.0172605	0.0240526		0.0582925	0.0364705	0.0570586	0.0694115
554	0.0181428	0.00954733	0.0177136	0.0246845		0.0598133	0.0374317	0.0585651	0.0712336
555	0.0182182	0.00958419	0.0177856	0.0247867		0.0600572	0.0375752	0.058809	0.0715493
556	0.0180179	0.0094777	0.0175886	0.0245149		0.0594116	0.0371591	0.0581634	0.0707602
557	0.0174944	0.00919873	0.0170758	0.0238024		0.0576899	0.0360831	0.0564847	0.0687229
558	0.0173971	0.00914051	0.0169779	0.0236723		0.0573886	0.0358679	0.0561835	0.0683642
559	0.0171125	0.00898645	0.0166973	0.0232876		0.0564704	0.0352797	0.0552796	0.0672882
560	0.0173705	0.00911914	0.0169465	0.0236372		0.0573312	0.0358105	0.0561117	0.0683068
561	0.0176395	0.0092575	0.0172074	0.0240057		0.0582351	0.03637	0.0569869	0.0693828
562	0.0175542	0.00920635	0.0171207	0.0238892		0.0579769	0.0361835	0.0567286	0.0690672
563	0.0180733	0.00947055	0.0176243	0.0245989		0.0597129	0.0372452	0.0584216	0.0711619
564	0.0176123	0.00922376	0.0171722	0.0239754		0.0582208	0.0362983	0.0569582	0.0693828
565	0.0175038	0.00916226	0.0170631	0.0238275		0.0578764	0.0360687	0.0566139	0.0689668
566	0.0172967	0.00905267	0.0168571	0.0235421		0.0572021	0.0356383	0.0559396	0.0681633
567	0.0176614	0.00923701	0.0172011	0.0240296		0.058436	0.0363844	0.057116	0.0696124
568	0.0175199	0.00914329	0.0169925	0.0237632		0.0580486	0.0360831	0.0565565	0.0689955
569	0.0171017	0.00888754	0.0163947	0.0229809		0.0568291	0.0351792	0.0548492	0.0670873
570	0.0171583	0.00892577	0.0165443	0.0231737		0.0569726	0.0353083	0.0552509	0.0675177
571	0.0171184	0.00891782	0.0166314	0.0232674		0.056786	0.0352366	0.0553944	0.0676038
572	0.0175513	0.00911961	0.0169534	0.0237511		0.0583212	0.0361118	0.0566426	0.069225
573	0.0177906	0.00924231	0.0172052	0.0241008		0.0591246	0.0365996	0.0574604	0.0702293
574	0.0177791	0.00923511	0.0172123	0.0241115		0.0590959	0.0365709	0.057489	0.0702437
575	0.0174835	0.00907406	0.0169207	0.0237079		0.0581347	0.035954	0.0565421	0.0691102
576	0.0173638	0.00901457	0.0168264	0.0235703		0.057733	0.0357101	0.0562122	0.0686798
577	0.0175803	0.00913154	0.0170527	0.0238827		0.058436	0.0361692	0.0569295	0.069555
578	0.0173519	0.00902394	0.0168744	0.0236179		0.0576325	0.0356957	0.0562552	0.0686942
579	0.0174442	0.00908559	0.0169855	0.0237575		0.0578621	0.0358966	0.0565565	0.0690098
580	0.0177876	0.00928648	0.017322	0.0242122		0.0589094	0.0366283	0.0575751	0.070215
581	0.0179026	0.00936221	0.0174409	0.0243644		0.0592251	0.0368722	0.0578908	0.0705737
582	0.0182658	0.00956905	0.0177904	0.0248387		0.0603585	0.0376326	0.0589955	0.0718649
583	0.0183395	0.00962074	0.0178606	0.0249282		0.0605306	0.0378048	0.0591677	0.0720658
584	0.0185181	0.00972206	0.0180216	0.025148		0.0610902	0.0381778	0.0596842	0.0726683
585	0.0180831	0.00949739	0.0175937	0.024549		0.0596411	0.0372739	0.0582494	0.0709323
586	0.0177216	0.00930396	0.017204	0.0240113		0.0584647	0.0365279	0.0570012	0.0694259
587	0.0181021	0.00948761	0.0174765	0.0244188		0.0597989	0.0373026	0.0580486	0.0707745
588	0.0175873	0.00915982	0.0166248	0.0233183		0.0583499	0.0361835	0.05571	0.068192
589	0.0154692	0.00796274	0.0141896	0.020019		0.0517645	0.0317216	0.0481347	0.0592681
590	0.0161973	0.00834124	0.0148666	0.0209714		0.0541749	0.033228	0.0504302	0.0620801
591	0.0172409	0.00893183	0.0160444	0.022575		0.0574173	0.0354231	0.0541318	0.0664704
592	0.0170323	0.00879601	0.0157597	0.0221956		0.0568434	0.034964	0.0532566	0.0654517
593	0.0173961	0.00903127	0.0163416	0.0229487		0.0578477	0.0357531	0.0548779	0.0672451
594	0.0173187	0.00897944	0.0162053	0.0227735		0.0576469	0.0355809	0.0544761	0.0668147
595	0.0168902	0.00872042	0.015609	0.0219906		0.0563843	0.0346771	0.0527832	0.0648778
596	0.0176872	0.00920955	0.0167496	0.0234935		0.0586799	0.0363844	0.056083	0.0686368
597	0.0175291	0.00911132	0.0165613	0.0232428		0.0582208	0.0360544	0.0555235	0.0679768
598	0.0175533	0.00914669	0.0166682	0.0233713		0.0581921	0.0361261	0.055753	0.0682064
599	0.0176386	0.00920469	0.0168246	0.0235704		0.0584073	0.0363126	0.0561691	0.0686511
600	0.0177388	0.00928064	0.017061	0.0238671		0.0586368	0.0365422	0.0567573	0.0692681
601	0.0176539	0.00925209	0.0170921	0.0238825		0.0582781	0.03637	0.0567	0.0691102
602	0.0175626	0.00920755	0.0170385	0.0238005		0.0579625	0.0361835	0.0564847	0.0688376
603	0.0178871	0.00938402	0.0173866	0.0242771		0.0590098	0.0368578	0.0575895	0.0701432
604	0.0182057	0.0095542	0.0177166	0.0247314		0.0600428	0.0375178	0.0586512	0.0714345
605	0.0181481	0.00953113	0.0176765	0.0246682		0.0598276	0.037403	0.058479	0.0712049
606	0.0181218	0.00952819	0.0176515	0.0246253		0.0596985	0.03736	0.0583499	0.0710328
607	0.0183492	0.0096599	0.0178736	0.0249256		0.0603872	0.0378334	0.0590385	0.0718362
608	0.018183	0.00958239	0.017714	0.0246938		0.0597989	0.0375035	0.0584647	0.0711188
609	0.018246	0.00962268	0.0177771	0.0247749		0.0599711	0.0376326	0.0586368	0.0713054
610	0.018123	0.00956482	0.0176619	0.0246069		0.059555	0.0373887	0.0582351	0.0708032
611	0.01825	0.00963688	0.0177866	0.0247761		0.0599424	0.0376469	0.0586225	0.0712623
612	0.0182065	0.00961843	0.0177489	0.0247194		0.0597846	0.0375609	0.058479	0.0710902
613	0.0179975	0.00951086	0.0175487	0.0244352		0.0590959	0.0371304	0.0578047	0.070258
614	0.017776	0.00940089	0.0173352	0.0241324		0.0583355	0.0366857	0.057073	0.0693541
615	0.0181946	0.00963123	0.0177451	0.024696		0.0596698	0.0375609	0.0583929	0.0709323
616	0.0176194	0.00933184	0.017186	0.0239114		0.0577616	0.03637	0.0565278	0.0686511
617	0.0176046	0.00932801	0.0171738	0.0238908		0.0577043	0.0363413	0.0564704	0.0685794
618	0.0183027	0.00970074	0.0178567	0.0248377		0.0599711	0.0377904	0.0586942	0.0712767
619	0.0181427	0.00961891	0.0177033	0.0246198		0.0594403	0.0374604	0.0581777	0.0706454
620	0.0182649	0.00968095	0.0178238	0.0247903		0.0598563	0.0377043	0.0585938	0.0711475
621	0.0182788	0.00967718	0.0178411	0.02482		0.0599568	0.0377187	0.0586942	0.071291
622	0.0179438	0.00947037	0.0175161	0.0243933		0.0589955	0.0370157	0.0577616	0.0702293
623	0.0175545	0.00923476	0.0171397	0.0238892		0.0578477	0.0361835	0.0566426	0.0689381
624	0.017347	0.00914234	0.0169362	0.0235928		0.0570873	0.0357675	0.0558965	0.0679912
625	0.0174561	0.00922287	0.0170409	0.0237207		0.0573456	0.0360114	0.0561548	0.0682494
626	0.0177666	0.00938979	0.0173191	0.0241084		0.0583499	0.036657	0.057073	0.0693685
627	0.0179878	0.00949222	0.0174472	0.0243086		0.0591533	0.0371017	0.0576325	0.0701145
628	0.0169498	0.00877427	0.0163547	0.02293		0.0565134	0.0348205	0.0548205	0.0671016
629	0.0176714	0.00926811	0.0170994	0.0238729		0.0583642	0.0363987	0.0567573	0.069182
630	0.0173423	0.00909882	0.0168637	0.0235271		0.0572738	0.0357244	0.0558965	0.0681059
631	0.0177569	0.0093825	0.0173076	0.0240904		0.0583499	0.0366283	0.0570586	0.0693541
632	0.017548	0.00928192	0.0169775	0.0236425		0.0576182	0.0362122	0.0560256	0.0681346
633	0.0181526	0.00963637	0.0176151	0.0244941		0.0594403	0.0374748	0.0579338	0.0703584
634	0.0180127	0.0095864	0.0175239	0.024343		0.0588807	0.0372022	0.057489	0.0697559
635	0.0183102	0.00975597	0.0178002	0.0247194		0.0598133	0.0378334	0.0583642	0.0708032
636	0.0180782	0.00964327	0.0175891	0.0244178		0.0590098	0.03736	0.0576182	0.0698706
637	0.0183813	0.00981125	0.0178811	0.0248151		0.0599711	0.0379913	0.0585507	0.0709897
638	0.0185895	0.00993826	0.0181257	0.0251373		0.0605737	0.0384217	0.0592537	0.0717932
639	0.0184165	0.0098565	0.0179517	0.0248888		0.0599711	0.0380773	0.0586368	0.0710328
640	0.0182755	0.00979382	0.0178214	0.0246982		0.0594546	0.0377904	0.0581634	0.0704302
641	0.0182938	0.00981123	0.0178321	0.0247064		0.0594833	0.0378334	0.0581634	0.0704158
642	0.0182392	0.00979059	0.0177919	0.0246413		0.0592681	0.0377187	0.0579912	0.0701719
643	0.0184953	0.00992839	0.0180038	0.0249421		0.0601002	0.0382495	0.0587086	0.0710758
644	0.0184652	0.00992172	0.0179898	0.0249113		0.0599711	0.0381921	0.0586081	0.0709323
645	0.0185058	0.0099365	0.0179565	0.0248798		0.0601289	0.0382782	0.0585938	0.0709467
646	0.0180426	0.00965412	0.0172726	0.0239855		0.0587803	0.0372883	0.0566856	0.0687803
647	0.0177703	0.00944566	0.016702	0.0232744		0.0581777	0.0366857	0.0552509	0.0672738
648	0.0177835	0.00944561	0.0166033	0.0231558		0.0582638	0.0366857	0.0550213	0.0670729
649	0.0174826	0.00928496	0.016356	0.0228022		0.0572738	0.0360687	0.0541605	0.0659826
650	0.017694	0.00948303	0.0169577	0.023532		0.0575895	0.0365709	0.0555522	0.0673742
651	0.0185053	0.00993271	0.0177897	0.0246694		0.0601576	0.0382639	0.0581921	0.0705306
652	0.0176071	0.00935428	0.0163639	0.0228274		0.0576756	0.0363126	0.0542753	0.0661691
653	0.0183043	0.00982892	0.0175808	0.0243768		0.0594833	0.0378478	0.057489	0.0696698
654	0.018131	0.00974209	0.0174344	0.024168		0.0588951	0.0374891	0.0569869	0.0690529
655	0.017417	0.00931631	0.016552	0.0229901		0.0567717	0.0359827	0.0543327	0.0659682
656	0.0154689	0.00829842	0.0147787	0.0205084		0.0503155	0.0319798	0.048436	0.0587516
657	0.0158892	0.00852467	0.0151655	0.0210432		0.0516785	0.0328406	0.0496985	0.0602724
658	0.0178514	0.00960403	0.0171953	0.023821		0.0579482	0.0369152	0.0561117	0.0679625
659	0.0179712	0.00967127	0.0173681	0.0240522		0.0583212	0.0371735	0.0566426	0.0685794
660	0.0179735	0.00965958	0.0173998	0.0241021		0.0583786	0.0371735	0.056786	0.0687659
661	0.0179726	0.00963389	0.0175081	0.024254		0.0584933	0.0371591	0.0571734	0.0692394
662	0.017917	0.00957029	0.0175141	0.0242802		0.0584647	0.0370157	0.0572882	0.0694259
663	0.0176732	0.0094616	0.0172617	0.0239167		0.0575751	0.0365279	0.0563843	0.0682925
664	0.0180661	0.00972163	0.0176598	0.0244282		0.0586368	0.0373743	0.0574604	0.0694976
665	0.0181937	0.00982093	0.0177927	0.0245874		0.0589094	0.0376469	0.0577473	0.0697846
666	0.0183247	0.00991547	0.0179297	0.0247577		0.0592394	0.0379339	0.0580773	0.0701289
667	0.0183898	0.00996951	0.0179968	0.0248364		0.0593542	0.0380773	0.0582208	0.070258
668	0.0184517	0.0100175	0.0180758	0.0249305		0.0594977	0.0382208	0.0583929	0.0704445
669	0.0187744	0.0102	0.0183878	0.0253549		0.060502	0.0388808	0.0593685	0.0716066
670	0.0187293	0.0101816	0.0183482	0.0252957		0.0603441	0.0387947	0.0592251	0.0714058
671	0.0187541	0.0102001	0.0183743	0.0253283		0.0604015	0.0388521	0.0592824	0.0714632
672	0.0186205	0.0101318	0.018246	0.0251475		0.0599568	0.0385795	0.058852	0.0709467
673	0.0189306	0.0103039	0.0185491	0.0255623		0.0609324	0.0392251	0.0598133	0.0720945
674	0.0188868	0.0102856	0.0185085	0.0255029		0.0607745	0.039139	0.0596555	0.0719079
675	0.0187423	0.0102106	0.0183674	0.0253051		0.0602867	0.0388377	0.059182	0.0713341
676	0.0188953	0.0102965	0.0185185	0.0255103		0.0607745	0.0391534	0.0596555	0.0718936
677	0.0187298	0.0102079	0.0183564	0.0252851		0.0602294	0.0388091	0.0591246	0.071248
678	0.0188018	0.0102506	0.0184285	0.0253812		0.0604446	0.0389669	0.0593542	0.0715062
679	0.0185225	0.0101002	0.0181565	0.0250037		0.0595407	0.0383786	0.0584647	0.0704302
680	0.0186998	0.0102016	0.0183283	0.0252391		0.0601002	0.0387517	0.0590098	0.0710902
681	0.0186087	0.0101533	0.0182318	0.0251065		0.0597989	0.0385652	0.0586942	0.0707028
682	0.0186181	0.0101607	0.0182341	0.0251088		0.0598276	0.0385795	0.0586942	0.0707171
683	0.018611	0.0101573	0.0182229	0.0250922		0.0597989	0.0385652	0.0586655	0.0706741
684	0.0185439	0.0101208	0.0181433	0.0249849		0.0595837	0.038436	0.0584216	0.0703728
685	0.018737	0.0102306	0.0183449	0.025256		0.060172	0.0388377	0.0590242	0.0711045
686	0.018649	0.0101795	0.0182457	0.0251245		0.0599137	0.0386512	0.0587373	0.0707745
687	0.0131418	0.00634972	0.0128364	0.018335		0.0459539	0.0264992	0.0449927	0.056083
688	0.0150401	0.00762892	0.0147221	0.0207134		0.0509324	0.030746	0.0499424	0.0613915
689	0.0150993	0.00767227	0.0147723	0.0207728		0.0510759	0.0308751	0.0500716	0.0615206
690	0.015737	0.00812232	0.0153829	0.0215319		0.0526541	0.0322954	0.0515924	0.0630988
691	0.0164343	0.00862644	0.015992	0.0222835		0.054347	0.0338449	0.0530558	0.0646339
692	0.0168653	0.00895567	0.0161437	0.0224523		0.0553083	0.0348062	0.053314	0.0648491
693	0.016504	0.00871825	0.0151497	0.0211777		0.0543327	0.0340028	0.0505594	0.0618219
694	0.0162573	0.00858776	0.0146768	0.0205235		0.0535292	0.0334289	0.0489525	0.0599281
695	0.0170303	0.00911459	0.0157384	0.0218836		0.0555378	0.0351218	0.0518363	0.0630988
696	0.0170736	0.00914538	0.0157855	0.0219406		0.0556526	0.0352079	0.051951	0.0632136
697	0.0183188	0.0099607	0.0175389	0.0242239		0.0590385	0.0379339	0.0569152	0.0687803
698	0.0180499	0.00981046	0.0172463	0.0238267		0.0581921	0.0373743	0.0560113	0.0677042
699	0.0175117	0.00941401	0.0162789	0.0225997		0.0569295	0.0361548	0.0534575	0.0649496
700	0.0173121	0.00930333	0.0160598	0.022306		0.0562982	0.0357531	0.0527688	0.0641605
701	0.0171	0.00914321	0.0156223	0.0217642		0.0558104	0.035294	0.0517215	0.0630414
702	0.0172949	0.00929017	0.0159878	0.0222222		0.0562552	0.0357244	0.0526541	0.0640457
703	0.0173653	0.00934119	0.0161416	0.0224052		0.0564274	0.0358535	0.0529553	0.064347
704	0.0180283	0.00976232	0.0170484	0.0235887		0.0582925	0.0372883	0.0555091	0.0672308
705	0.0180327	0.00975003	0.0168614	0.0233755		0.0583642	0.0372883	0.0552222	0.0669869
706	0.0180915	0.0098115	0.0170817	0.0236402		0.0584216	0.0374461	0.0557243	0.067489
707	0.018129	0.00983959	0.0171231	0.0236921		0.0585077	0.0375178	0.0558248	0.0675894
708	0.0181964	0.00987415	0.0171804	0.0237751		0.0587373	0.0376613	0.05604	0.067862
709	0.0183149	0.00998634	0.0175442	0.0242096		0.0589094	0.0379339	0.0568291	0.0686224
710	0.0183015	0.00995304	0.0173757	0.0240152		0.0589812	0.0378908	0.0565278	0.0683498
711	0.0183276	0.0099858	0.0174954	0.024156		0.0589812	0.0379626	0.0567573	0.0685794
712	0.0183243	0.0100061	0.0176027	0.0242745		0.0588807	0.0379626	0.0569152	0.0686942
713	0.018139	0.00988328	0.0173182	0.0239109		0.0583642	0.0375752	0.0561835	0.0678764
714	0.0182394	0.00994509	0.017438	0.0240693		0.0586655	0.0377761	0.0565134	0.0682638
715	0.0176103	0.00955332	0.016556	0.0229201		0.0568721	0.0364418	0.0540601	0.0654948
716	0.0176085	0.00953628	0.0164463	0.0227904		0.0569295	0.0364274	0.0538305	0.0652652
717	0.0148367	0.00765906	0.0123019	0.0174443		0.0496842	0.0303299	0.0422954	0.0525106
718	0.0134725	0.00687974	0.0109137	0.0155847		0.0454805	0.0274031	0.0380343	0.0475752
719	0.0124083	0.00632689	0.01003	0.0143123		0.0419511	0.0252223	0.0348636	0.0436154
720	0.0129755	0.00657128	0.0102831	0.0147456		0.0440601	0.0263414	0.0361405	0.0453944
721	0.0146551	0.00766386	0.0126014	0.0177576		0.0486369	0.0300286	0.0427545	0.0527688
722	0.0170785	0.00918444	0.015712	0.0218386		0.0555091	0.0352797	0.0517789	0.062984
723	0.0157544	0.00834261	0.013958	0.0195521		0.0518076	0.0323959	0.0467574	0.0573456
724	0.0140344	0.00728565	0.0118329	0.016737		0.0468291	0.0286943	0.0404446	0.0501146
725	0.0137033	0.00704603	0.0112402	0.0159976		0.04604	0.0279339	0.0389095	0.0485221
726	0.01445	0.00747456	0.0120369	0.0170391		0.0483356	0.0295264	0.0412194	0.0511046
727	0.0147705	0.00772201	0.0126421	0.0178266		0.0490386	0.0302581	0.0429554	0.0530558
728	0.0137696	0.00709342	0.0113584	0.0161045		0.0461978	0.0280917	0.0390243	0.0484647
729	0.0144776	0.00759838	0.0125204	0.0175895		0.0479338	0.0296843	0.0422093	0.0519367
730	0.0152931	0.00799152	0.0130261	0.0183679		0.0507746	0.0313629	0.044261	0.0546483
731	0.0146208	0.00761634	0.0123685	0.0174564		0.0486655	0.0299425	0.0421089	0.0520515
732	0.0158491	0.00840626	0.0140649	0.019664		0.0520658	0.0325967	0.0469008	0.0574317
733	0.0169661	0.00912991	0.0155946	0.0216677		0.0551218	0.0350358	0.0513198	0.0624245
734	0.01745	0.00943673	0.0162518	0.0225217		0.0564847	0.0360687	0.0531562	0.0644905
735	0.0170815	0.0092122	0.0157897	0.0219132		0.0554087	0.035294	0.0518076	0.0629553
736	0.0170704	0.00919864	0.0157156	0.0218327		0.0553944	0.0352797	0.0517071	0.0628836
737	0.0171643	0.00925221	0.0158215	0.0219718		0.0556957	0.0354662	0.0520084	0.0632136
738	0.0175529	0.00956065	0.0165244	0.0228461		0.0565134	0.0363413	0.0537875	0.065093
739	0.0172268	0.00938607	0.0162441	0.0224486		0.0554518	0.035667	0.0528119	0.0638879
740	0.0177585	0.0097129	0.0169434	0.0233645		0.0570012	0.0367861	0.0548061	0.0661404
741	0.0176405	0.0096696	0.0169378	0.0233295		0.0565278	0.0365566	0.0546196	0.0658678
742	0.0177168	0.0097346	0.0171498	0.0235856		0.0566713	0.0367287	0.0551074	0.0663412
743	0.0182051	0.0100111	0.0176672	0.0242896		0.0581921	0.0377474	0.0567	0.0682494
744	0.0182045	0.0100241	0.0177538	0.0243839		0.0581203	0.0377474	0.0568434	0.0683498
745	0.0182547	0.0100653	0.0178791	0.0245382		0.0582208	0.0378621	0.0571304	0.0686368
746	0.0183625	0.0101247	0.0179821	0.0246819		0.0585794	0.0380917	0.0574604	0.0690529
747	0.0184354	0.0101676	0.0180748	0.0248017		0.0587803	0.0382352	0.0577186	0.0693398
748	0.0184253	0.0101642	0.0180758	0.0248016		0.0587516	0.0382208	0.0577043	0.0693255
749	0.0182396	0.0100646	0.0179015	0.0245589		0.058149	0.0378334	0.0571447	0.0686368
750	0.0182549	0.0100732	0.017917	0.0245798		0.0581921	0.0378621	0.0571878	0.0686798
751	0.0180937	0.00998538	0.0177585	0.0243617		0.0576756	0.0375322	0.0566713	0.0680772
752	0.0181961	0.0100438	0.0178639	0.0245053		0.0579912	0.0377474	0.0570012	0.0684646
753	0.0183146	0.0101109	0.0179852	0.0246684		0.0583642	0.0379913	0.0573743	0.0689094
754	0.0183802	0.0101477	0.0180442	0.0247497		0.0585794	0.0381204	0.0575608	0.0691389
755	0.0182992	0.010103	0.0179629	0.0246366		0.0583212	0.0379626	0.0573025	0.0688233
756	0.018319	0.0101153	0.0179932	0.0246752		0.0583786	0.0380056	0.0573886	0.0689094
757	0.0183698	0.0101442	0.0180428	0.0247454		0.0585364	0.038106	0.0575464	0.0691102
758	0.0181676	0.0100312	0.0178452	0.0244742		0.0579051	0.03769	0.0569152	0.0683642
759	0.0178561	0.0098055	0.0175391	0.0240912		0.0571304	0.0370157	0.0561691	0.0675608
760	0.00412684	0.00136085	0.00404833	0.00650846		0.0175896	0.0069512	0.017274	0.0240889
761	0.00252135	0.000696999	0.00247298	0.00420516		0.0115236	0.00380056	0.011317	0.016657
762	0.0100539	0.00455459	0.00987145	0.0143607		0.0365709	0.0198565	0.035954	0.0455953
763	0.00576803	0.00213905	0.00566034	0.00876811		0.0233141	0.0103859	0.0229124	0.0308177
764	0.00799194	0.00332618	0.00784677	0.0117208		0.0304877	0.0152367	0.0299712	0.0389525
765	0.0100997	0.00457234	0.00991595	0.0144278		0.0367574	0.0199425	0.0361405	0.0458248
766	0.0119317	0.00580241	0.0117161	0.0166781		0.0415637	0.0241319	0.0408607	0.0507746
767	0.0146656	0.00756526	0.0144015	0.0201408		0.049096	0.0301003	0.0482782	0.0590242
768	0.0166695	0.00897335	0.0163711	0.0226155		0.0541462	0.0344762	0.0532279	0.064347
769	0.0169881	0.00923131	0.0166844	0.0229854		0.0547918	0.0351792	0.0538592	0.0649496
770	0.0175293	0.00962634	0.0172181	0.0236478		0.0560974	0.0363413	0.0551505	0.0663125
771	0.017669	0.00974776	0.0173554	0.0238073		0.0563413	0.0366426	0.0553944	0.0665278
772	0.0177226	0.00979235	0.0174076	0.0238696		0.0564417	0.0367574	0.0554948	0.0666282
773	0.0178693	0.00987664	0.0175509	0.0240636		0.0569008	0.037073	0.0559396	0.067159
774	0.0178058	0.00984484	0.0174868	0.0239755		0.0566856	0.0369439	0.0557243	0.0669008
775	0.0176938	0.00978464	0.017376	0.0238218		0.0563126	0.0367	0.0553513	0.066456
776	0.0179325	0.00991813	0.0176101	0.0241413		0.057073	0.0372022	0.0560974	0.0673455
777	0.0177184	0.00980102	0.0174016	0.0238558		0.0563843	0.0367574	0.0554374	0.0665421
778	0.0176344	0.0097532	0.0173155	0.0237372		0.0561261	0.0365852	0.0551648	0.0662121
779	0.017673	0.0097734	0.0173508	0.0237873		0.0562408	0.036657	0.0552796	0.0663556
780	0.0175973	0.00973431	0.0172798	0.0236875		0.0559969	0.0365135	0.0550357	0.0660686
781	0.0176388	0.0097587	0.0173181	0.0237418		0.0561261	0.0365996	0.0551648	0.0662121
782	0.0177705	0.00983175	0.0174471	0.0239166		0.0565421	0.0368722	0.0555665	0.0666999
783	0.017483	0.00967453	0.017165	0.0235285		0.0556239	0.0362696	0.0546627	0.0656095
784	0.0175914	0.00973574	0.0172715	0.0236726		0.0559539	0.0364992	0.0549926	0.0659969
785	0.0174672	0.00966193	0.0171015	0.0234513		0.0555952	0.0362409	0.0545192	0.0654661
786	0.0176701	0.00976898	0.0172592	0.0236772		0.0562552	0.036657	0.0550787	0.0661691
787	0.0173104	0.00951117	0.0166369	0.0228953		0.0553657	0.0358822	0.0535149	0.0644905
788	0.0170808	0.00935891	0.01629	0.0224492		0.0547487	0.0353801	0.0525823	0.0634575
789	0.0170601	0.00933739	0.0161522	0.0222849		0.0547344	0.035337	0.0523097	0.0631849
790	0.0165595	0.00899635	0.0154624	0.0213891		0.0534288	0.0342323	0.0503442	0.0609898
791	0.0167971	0.00919364	0.0159267	0.0219709		0.0538879	0.0347775	0.051535	0.0622523
792	0.0167149	0.00916054	0.0159197	0.0219403		0.0535723	0.0346197	0.0514059	0.0620371
793	0.0164547	0.0090101	0.01563	0.0215535		0.0527832	0.0340745	0.0505307	0.0610184
794	0.0168783	0.00932882	0.0164519	0.0225729		0.0537444	0.0350071	0.0525393	0.0631275
795	0.0171521	0.00945563	0.0165884	0.0227945		0.05472	0.0355666	0.0531706	0.0639883
796	0.0165059	0.0089915	0.0154878	0.021403		0.0531419	0.0341462	0.0503298	0.060918
797	0.0165324	0.00899735	0.0154525	0.0213723		0.053271	0.034218	0.0503298	0.0609467
798	0.0171679	0.0094505	0.0165013	0.0226987		0.0548492	0.0355953	0.0530558	0.0639022
799	0.0170543	0.0093665	0.016301	0.0224485		0.0545766	0.035337	0.0525393	0.063357
800	0.016737	0.00916307	0.0158531	0.0218675		0.0536871	0.0346627	0.0513198	0.0619797

## Sheet: 40degN
40 degrees N latitude	Daily Irradiance (mE cm-2 d-1 nm-1)					Solar Noon Irradiance (mE cm-2 d-1 nm-1)
wavelength (nm)	March 20th	June 21st	September 22nd	December 22nd		March 20th	June 21st	September 22nd	December 22nd
280	4.0466e-23	1.1223e-20	2.3767e-21	2.71709e-22		5.64991e-24	1.43472e-19	1.44189e-20	2.05595e-21
281	6.12593e-21	6.19989e-19	9.58958e-20	1.49766e-21		4.50644e-22	7.83785e-18	7.30557e-19	5.95407e-21
282	9.40839e-21	4.16031e-17	5.89814e-18	5.57596e-20		5.61548e-20	5.00572e-16	4.79195e-17	2.39884e-19
283	9.82796e-20	3.60796e-16	6.67362e-17	5.09826e-19		7.13771e-19	4.21089e-15	6.21662e-16	2.18077e-18
284	2.78896e-18	5.97952e-15	1.23228e-15	1.36501e-17		2.20516e-17	6.65278e-14	1.23013e-14	5.52939e-17
285	2.279e-17	2.59216e-14	4.61429e-15	3.83912e-17		2.08751e-16	2.69153e-13	4.69152e-14	1.70444e-16
286	6.66942e-16	5.24328e-13	8.86209e-14	7.46937e-16		6.505e-15	5.25106e-12	9.06166e-13	3.31563e-15
287	1.04788e-14	5.92113e-12	7.54317e-13	8.23885e-15		1.04792e-13	5.81634e-11	7.77759e-12	3.62409e-14
288	1.76412e-13	4.3888e-11	8.14858e-12	6.25381e-14		1.78192e-12	3.98851e-10	8.19653e-11	2.7317e-13
289	1.82569e-12	3.5446e-10	7.20277e-11	4.90057e-13		1.85222e-11	3.08751e-09	7.09036e-10	2.19798e-12
290	2.16305e-11	2.62784e-09	6.01672e-10	3.7693e-12		2.14203e-10	2.18077e-08	5.79051e-09	1.71162e-11
291	1.22167e-10	9.92508e-09	2.26277e-09	1.48093e-11		1.17991e-09	7.87946e-08	2.06025e-08	6.76038e-11
292	9.71328e-10	4.71233e-08	1.35111e-08	7.84126e-11		8.91963e-09	3.52366e-07	1.15466e-07	3.74748e-10
293	3.498e-09	1.17671e-07	3.93451e-08	2.24131e-10		3.07029e-08	8.48921e-07	3.19655e-07	1.12683e-09
294	1.6531e-08	3.42218e-07	1.44614e-07	7.74687e-10		1.35868e-07	2.33859e-06	1.08651e-06	4.14202e-09
295	5.54814e-08	9.53527e-07	3.09663e-07	1.87585e-09		4.54661e-07	6.14919e-06	2.34576e-06	1.10014e-08
296	2.24163e-07	2.71019e-06	1.11587e-06	8.51139e-09		1.73457e-06	1.65136e-05	8.08749e-06	5.12193e-08
297	4.00568e-07	3.9401e-06	1.69651e-06	1.60186e-08		2.98995e-06	2.30272e-05	1.18594e-05	9.92967e-08
298	1.50099e-06	1.17377e-05	5.32953e-06	6.63036e-08		1.07145e-05	6.52796e-05	3.55379e-05	4.28406e-07
299	3.19128e-06	2.14137e-05	1.01241e-05	1.5537e-07		2.20085e-05	0.000114863	6.49783e-05	1.03687e-06
300	5.31343e-06	2.96108e-05	1.4378e-05	2.97371e-07		3.49066e-05	0.000151649	8.71733e-05	2.07747e-06
301	1.30409e-05	6.19936e-05	3.04531e-05	9.61827e-07		8.13914e-05	0.000303586	0.000176183	7.10902e-06
302	1.64311e-05	6.71062e-05	3.21469e-05	1.22788e-06		9.76467e-05	0.000318076	0.000182065	9.13483e-06
303	5.35976e-05	0.000190702	9.73782e-05	4.5824e-06		0.000306168	0.000866999	0.000527401	3.36154e-05
304	5.91831e-05	0.000200815	0.000103768	5.687e-06		0.00033185	0.000892967	0.000549209	4.10185e-05
305	0.000116569	0.000350612	0.000189851	1.42202e-05		0.000621949	0.00148923	0.00095552	9.85363e-05
306	0.000120814	0.000342591	0.00018826	1.64164e-05		0.000627545	0.00142051	0.000923239	0.000111248
307	0.000202236	0.000528637	0.000300258	3.2767e-05		0.00100904	0.00211477	0.00141391	0.00021406
308	0.00026688	0.000656183	0.000398972	5.30922e-05		0.00128809	0.00254949	0.00183213	0.000334289
309	0.000298202	0.000680996	0.000385546	5.52935e-05		0.00139641	0.00257244	0.00174461	0.000341462
310	0.000323978	0.000699604	0.000404775	6.74951e-05		0.00146915	0.00256384	0.00177331	0.000400429
311	0.000642257	0.00135431	0.00078811	0.000139748		0.00287087	0.00489812	0.00340601	0.000815205
312	0.000599668	0.00121689	0.000718576	0.000141081		0.00261549	0.00429984	0.00303299	0.000799567
313	0.000765569	0.00150447	0.000896713	0.000191426		0.00326541	0.00521232	0.00370874	0.00105796
314	0.00092281	0.00178487	0.00106971	0.000237705		0.00389238	0.0061205	0.00437875	0.00129813
315	0.00103707	0.00192917	0.0011716	0.00028874		0.00424819	0.00644474	0.00466713	0.0015251
316	0.000753965	0.00138648	0.000845317	0.000214342		0.00306168	0.00459396	0.00334002	0.0011218
317	0.00131999	0.00237254	0.00145704	0.000392149		0.0052611	0.00773312	0.00566139	0.00201147
318	0.00106604	0.00189766	0.00116893	0.000322186		0.00421519	0.00614058	0.00451075	0.00163845
319	0.00151772	0.00259081	0.00162484	0.000505558		0.00576756	0.00815205	0.00604446	0.0024591
320	0.00153733	0.00268736	0.00166246	0.00047918		0.0059842	0.00858821	0.00632853	0.00240028
321	0.00163517	0.00271604	0.00171989	0.000579266		0.00603872	0.00837013	0.00623384	0.00273026
322	0.00171804	0.00291696	0.00182108	0.000570144		0.00649783	0.0091377	0.00675751	0.002769
323	0.00146484	0.00244249	0.00154024	0.000509856		0.00543614	0.00754804	0.00561261	0.0024218
324	0.00208594	0.00338012	0.00213937	0.000753734		0.00755952	0.0101535	0.00768003	0.00346627
325	0.0018528	0.0030756	0.00193453	0.000644929		0.00684503	0.00946912	0.00703154	0.00305738
326	0.00288461	0.00466013	0.00294981	0.00104542		0.0104246	0.0139583	0.0105667	0.00479625
327	0.00287897	0.00461755	0.00292405	0.0010553		0.01033	0.0137374	0.0104103	0.00480199
328	0.00251601	0.00410984	0.00258397	0.000883151		0.00919509	0.0124275	0.00936008	0.00412624
329	0.00310783	0.00492839	0.00313653	0.00116897		0.0110186	0.014505	0.0110459	0.00523815
330	0.00356804	0.00565043	0.0035903	0.00133998		0.0126327	0.016614	0.0126355	0.00600285
331	0.00294277	0.00471972	0.00298463	0.00107107		0.0105652	0.0140373	0.0106384	0.00489525
332	0.00320334	0.00504591	0.00321527	0.00121715		0.0112783	0.0147489	0.0112582	0.00541892
333	0.00316224	0.00496962	0.00316527	0.00120447		0.0111047	0.0144906	0.0110617	0.00534862
334	0.00295745	0.00468761	0.00297815	0.00110358		0.0104892	0.0137847	0.0104978	0.00496985
335	0.00318788	0.00498294	0.00330719	0.00122829		0.0111277	0.0144476	0.0115179	0.00541892
336	0.00260952	0.00405884	0.00256192	0.000993146		0.00909753	0.0117561	0.00891532	0.00437301
337	0.00249854	0.00392514	0.00249963	0.000947396		0.00877759	0.0114404	0.00874029	0.0042238
338	0.00303103	0.00473386	0.00315248	0.00116622		0.0105753	0.0137144	0.0109684	0.0051535
339	0.00348487	0.00542248	0.00343231	0.00133195		0.0121377	0.0156958	0.0119325	0.00586081
340	0.00393054	0.00613263	0.00407608	0.001512		0.0137015	0.0177474	0.014175	0.0066829
341	0.00348251	0.00541314	0.00343127	0.00133235		0.0121219	0.0156527	0.0119211	0.00586655
342	0.00381979	0.00593958	0.00377205	0.00146736		0.013284	0.0171592	0.0130932	0.00644905
343	0.00395185	0.00614092	0.00390011	0.00151724		0.0137388	0.0177331	0.0135337	0.0066743
344	0.00274454	0.00444731	0.00281995	0.00109515		0.00954516	0.0128393	0.0097948	0.00483786
345	0.0036909	0.0057309	0.00364504	0.00141887		0.0128235	0.0165279	0.0126413	0.00624532
346	0.0032065	0.00497706	0.00316896	0.00123583		0.0111305	0.0143472	0.0109799	0.00543327
347	0.00390719	0.00606168	0.00386203	0.00150581		0.0135609	0.0174748	0.0133802	0.00662552
348	0.00360735	0.00559524	0.00356769	0.00139247		0.0125122	0.0161119	0.0123529	0.00612337
349	0.00335209	0.00519772	0.00331659	0.00129623		0.0116183	0.0149641	0.0114763	0.00569582
350	0.00412117	0.00638617	0.00407726	0.00159487		0.0142769	0.0183644	0.0141004	0.00700859
351	0.00388747	0.00602304	0.00384556	0.00150324		0.0134677	0.017317	0.0132998	0.00661117
352	0.00407413	0.00630825	0.004029	0.0015752		0.0141119	0.0181348	0.0139311	0.00693255
353	0.00401301	0.00621066	0.00397074	0.00155524		0.013888	0.0178335	0.0137173	0.00683785
354	0.00444507	0.0068819	0.00439914	0.0017231		0.0153801	0.0197704	0.0151936	0.00757386
355	0.00451145	0.0069804	0.00446448	0.00174909		0.0156097	0.020043	0.0154232	0.00769151
356	0.00428825	0.00662923	0.00424419	0.00166524		0.0148206	0.01901	0.0146484	0.00731992
357	0.00302849	0.00468209	0.00299684	0.00117569		0.0104677	0.0134304	0.0103414	0.00516928
358	0.00294859	0.00455692	0.00291792	0.00114544		0.0101879	0.013066	0.0100645	0.00503585
359	0.00353932	0.00546815	0.00350232	0.00137544		0.0122252	0.0156671	0.0120774	0.00604733
360	0.00479689	0.00740791	0.00474527	0.00186371		0.016571	0.0212194	0.0163558	0.00819653
361	0.00349864	0.00540117	0.0034618	0.00136032		0.0120789	0.0154662	0.0119311	0.00598276
362	0.00349429	0.00539044	0.00345799	0.00136113		0.012053	0.0154232	0.0119081	0.0059842
363	0.00435321	0.00671028	0.00430806	0.00169765		0.0150071	0.0191821	0.0148206	0.00746196
364	0.00491747	0.0075775	0.00486741	0.00191977		0.016944	0.0216499	0.0167431	0.00843756
365	0.0042844	0.00659964	0.00423952	0.00167232		0.0147632	0.0188522	0.0145767	0.00735148
366	0.00571556	0.00879998	0.00565638	0.00223343		0.0196699	0.0251219	0.0194404	0.00981776
367	0.00524412	0.00806984	0.00519026	0.00205094		0.0180487	0.0230272	0.0178335	0.00901432
368	0.00476594	0.00733555	0.00471702	0.00186432		0.0163988	0.0209325	0.0161979	0.00819509
369	0.00521559	0.00802109	0.00516171	0.00204195		0.0179339	0.0228694	0.0177187	0.00897415
370	0.00594929	0.00914659	0.00588872	0.00233189		0.0204447	0.0260544	0.0202008	0.0102467
371	0.00495429	0.00760993	0.00490329	0.00194368		0.0170157	0.0216642	0.0168149	0.00853943
372	0.00411698	0.00632396	0.00407425	0.00161521		0.0141391	0.0180057	0.0139684	0.0070961
373	0.005041	0.00773837	0.00498861	0.00197975		0.0173027	0.0220229	0.0170875	0.00869725
374	0.00478096	0.00733745	0.00473192	0.00187947		0.0163988	0.0208608	0.0162123	0.00825535
375	0.00386167	0.00592296	0.00382182	0.00151906		0.0132424	0.0168436	0.0130832	0.00667286
376	0.00478345	0.00733755	0.00473478	0.00188186		0.0163988	0.0208608	0.0162123	0.0082654
377	0.00526752	0.00807592	0.00521277	0.00207413		0.0180487	0.0229411	0.0178335	0.00910901
378	0.00670887	0.010282	0.00664018	0.00264412		0.0229841	0.0291965	0.0227115	0.0116112
379	0.00524776	0.00803997	0.0051936	0.00206848		0.017977	0.0228263	0.0177618	0.00908318
380	0.00498996	0.00764525	0.00493742	0.00196634		0.0170875	0.0217072	0.0168866	0.00863412
381	0.00608099	0.00931045	0.00601675	0.00239908		0.0208177	0.0264131	0.0205595	0.0105322
382	0.00429415	0.00657136	0.00424915	0.00169627		0.0146915	0.018637	0.014505	0.00744474
383	0.00340089	0.00520127	0.00336576	0.00134514		0.0116255	0.0147345	0.0114863	0.00590242
384	0.00361971	0.00553453	0.00358204	0.00143247		0.0123701	0.0156814	0.0122209	0.00628549
385	0.00529476	0.00809281	0.00523911	0.00209672		0.0180918	0.0229124	0.0178622	0.00919796
386	0.00424034	0.00647714	0.00419621	0.00168129		0.0144763	0.0183213	0.0143012	0.007373
387	0.00464449	0.00709116	0.00459605	0.00184321		0.0158536	0.0200573	0.0156527	0.00808175
388	0.00482986	0.00737369	0.00477952	0.00191785		0.0164705	0.0208464	0.0162697	0.00840743
389	0.00516887	0.00788717	0.00511609	0.00205427		0.0176183	0.0222811	0.0174174	0.00900427
390	0.00630309	0.00961361	0.00623839	0.00250746		0.0214777	0.0271448	0.0212194	0.0109885
391	0.00685133	0.0104459	0.00678075	0.00272757		0.0233428	0.0294834	0.0230559	0.0119497
392	0.00589679	0.0089891	0.00583538	0.00234809		0.020086	0.0253658	0.0198421	0.0102869
393	0.00295101	0.00449566	0.00292064	0.00117691		0.010043	0.0126771	0.00992249	0.0051535
394	0.00437936	0.00666886	0.00433431	0.00174815		0.0148923	0.0187948	0.0147202	0.00765421
395	0.00681134	0.0103682	0.00674025	0.0027204		0.0231563	0.0292108	0.0228837	0.0119081
396	0.00600968	0.00914639	0.0059467	0.00240082		0.0204303	0.0257675	0.0201864	0.0105079
397	0.00264894	0.00402925	0.00262155	0.00106006		0.00899997	0.0113414	0.00889093	0.004637
398	0.00755201	0.0114867	0.0074711	0.00302109		0.0256527	0.0323385	0.0253371	0.0132166
399	0.00848796	0.0129022	0.00840145	0.00340165		0.0288091	0.036284	0.0284648	0.014878
400	0.00879423	0.013369	0.00870083	0.003523		0.0298564	0.0376039	0.0294834	0.0154088
401	0.00904372	0.0137544	0.00895014	0.00361447		0.0307316	0.0387086	0.0303586	0.0158249
402	0.00958272	0.0145645	0.00948523	0.00383577		0.0325393	0.0409611	0.032152	0.0168005
403	0.00913986	0.013884	0.0090453	0.00366277		0.0310185	0.0390243	0.0306455	0.0160258
404	0.00901358	0.013689	0.00892142	0.00361375		0.0305738	0.0384647	0.0302151	0.0158106
405	0.00902838	0.0137109	0.008934	0.00362092		0.0306168	0.0385221	0.0302581	0.0158393
406	0.00892131	0.0135389	0.00882902	0.0035832		0.0302295	0.0380056	0.0298708	0.0156671
407	0.00881697	0.0133718	0.00872601	0.00354632		0.0298564	0.0375035	0.0294977	0.0155093
408	0.00915991	0.0138944	0.00906562	0.00368244		0.0310329	0.0389812	0.0306599	0.0160975
409	0.00982656	0.0149044	0.00972482	0.00395228		0.0332711	0.0418076	0.0328693	0.017274
410	0.00860932	0.0130531	0.00852096	0.00346645		0.0291391	0.0365996	0.0287947	0.0151506
411	0.00935533	0.0141761	0.00925864	0.00377013		0.0316498	0.0397273	0.0312624	0.0164705
412	0.0100903	0.0152812	0.00998711	0.00407387		0.0341175	0.0427832	0.0337015	0.0177905
413	0.00983586	0.0148981	0.00973397	0.00396866		0.0332567	0.0417215	0.032855	0.0173314
414	0.00999432	0.0151309	0.00989178	0.00403693		0.0337732	0.0423528	0.0333715	0.0176183
415	0.0100569	0.0152172	0.0099531	0.00406682		0.0339597	0.042568	0.033558	0.0177474
416	0.0102812	0.0155466	0.0101759	0.00416504		0.0346914	0.0434575	0.0342754	0.0181635
417	0.0100493	0.0151948	0.00994658	0.00407178		0.0339023	0.0424676	0.0335006	0.0177618
418	0.00988393	0.0149421	0.00978324	0.00400728		0.0333428	0.0417502	0.0329411	0.0174748
419	0.0100379	0.0151706	0.00993417	0.00407226		0.0338449	0.0423671	0.0334432	0.0177474
420	0.0100138	0.0151321	0.00991042	0.00406365		0.0337589	0.0422524	0.0333571	0.0177044
421	0.0105065	0.0158719	0.0103984	0.0042678		0.0354088	0.044304	0.0349784	0.0185939
422	0.0100098	0.0151175	0.0099072	0.00406742		0.0337302	0.0421806	0.0333141	0.0177187
423	0.00980721	0.0148069	0.00970755	0.00398887		0.0330271	0.0413055	0.0326254	0.0173744
424	0.0103926	0.0156899	0.0102858	0.00422649		0.0349927	0.0437588	0.0345766	0.0184074
425	0.0104138	0.0157149	0.0103071	0.00424012		0.0350501	0.0438019	0.0346197	0.0184648
426	0.0101926	0.015369	0.0100901	0.00415846		0.0342754	0.0427976	0.0338593	0.0180918
427	0.0100161	0.0151015	0.00991454	0.00408733		0.0336728	0.0420515	0.0332711	0.0177761
428	0.00976662	0.0147256	0.00966595	0.00398486		0.0328406	0.0410042	0.0324389	0.0173314
429	0.00929685	0.0140054	0.00920162	0.00380026		0.0312194	0.0389669	0.0308464	0.0165136
430	0.00815694	0.0122855	0.00807447	0.00333781		0.0273887	0.0341606	0.0270587	0.014505
431	0.00808628	0.0121823	0.00800306	0.00330558		0.0271592	0.033888	0.0268292	0.0143615
432	0.0104902	0.0157929	0.0103838	0.00429691		0.0352079	0.0439023	0.0347775	0.0186656
433	0.0105769	0.0159204	0.0104705	0.00433445		0.0354805	0.0442323	0.0350501	0.0188235
434	0.00983065	0.0147983	0.00973047	0.00402838		0.0329841	0.0411189	0.0325824	0.0174892
435	0.0102722	0.0154651	0.0101654	0.00420623		0.0344619	0.0429841	0.0340458	0.0182639
436	0.0116236	0.017488	0.0115048	0.00476899		0.0389669	0.0485651	0.0384934	0.0207029
437	0.0115218	0.0173192	0.011405	0.00473582		0.0385938	0.0480486	0.0381204	0.0205451
438	0.0105295	0.0158216	0.0104232	0.00433314		0.035251	0.0438736	0.0348205	0.0187948
439	0.0108582	0.0163321	0.0107459	0.00445581		0.0363844	0.045337	0.035954	0.01934
440	0.0112495	0.0169135	0.0111369	0.00462355		0.0376756	0.0469295	0.0372309	0.0200573
441	0.0117243	0.0176144	0.0116086	0.00482788		0.0392395	0.0488234	0.038766	0.0209325
442	0.0126114	0.0189408	0.0124949	0.00519989		0.042195	0.0524819	0.0417072	0.0225394
443	0.0122834	0.0184567	0.0121966	0.00507411		0.0411189	0.051162	0.0407172	0.0219942
444	0.0125781	0.0188927	0.0124662	0.00518883		0.0420802	0.0523528	0.0416211	0.0224963
445	0.0122995	0.0184803	0.0121936	0.0050722		0.041162	0.0512337	0.0407172	0.0219798
446	0.0118024	0.017717	0.0117019	0.00487899		0.0394547	0.0490529	0.0390243	0.0211334
447	0.0128085	0.0192151	0.0126851	0.00529631		0.0427832	0.0531706	0.0422811	0.0229268
448	0.0129776	0.0194845	0.0128476	0.00535227		0.0433858	0.0539596	0.0428693	0.023185
449	0.0131104	0.0196661	0.0129827	0.00542263		0.0437732	0.0543901	0.0432567	0.0234719
450	0.01353	0.0202844	0.0133984	0.0056025		0.0451505	0.0560687	0.0446197	0.0242323
451	0.0140619	0.0210801	0.0139246	0.00582321		0.0469152	0.0582638	0.04637	0.0251936
452	0.0135782	0.0203484	0.0134435	0.00562546		0.045294	0.0562265	0.0447488	0.0243328
453	0.0128009	0.0191804	0.0126731	0.00530618		0.0426828	0.052984	0.0421663	0.0229411
454	0.0134118	0.020084	0.0132801	0.00556759		0.0446914	0.0554374	0.0441605	0.0240602
455	0.0135088	0.0202338	0.0133785	0.00560681		0.0450214	0.0558678	0.0444905	0.0242323
456	0.0138716	0.0207708	0.0137375	0.00576176		0.0462122	0.0573312	0.045667	0.0248923
457	0.0141425	0.0211742	0.0140057	0.0058751		0.0471161	0.058436	0.0465565	0.0253801
458	0.0136623	0.0204641	0.0135303	0.00566772		0.0455379	0.0564991	0.045007	0.0245049
459	0.0136405	0.020425	0.0135126	0.00566372		0.0454518	0.05637	0.0449209	0.0244906
460	0.0136982	0.0205158	0.0135686	0.00568369		0.0456526	0.0566426	0.0451218	0.0245767
461	0.0140451	0.0210352	0.013918	0.00583074		0.0468004	0.0580629	0.0462696	0.0252223
462	0.0142042	0.0212632	0.0140786	0.00590607		0.0473026	0.0586512	0.0467717	0.0255236
463	0.0140944	0.0211061	0.0139643	0.00585304		0.0469582	0.0582494	0.046413	0.0253084
464	0.0139105	0.0208153	0.0137812	0.00578669		0.0462983	0.057403	0.0457674	0.0249927
465	0.0137927	0.0206249	0.013665	0.00575058		0.0458679	0.0568147	0.045337	0.0248206
466	0.0139801	0.0208927	0.0138489	0.00583582		0.0464561	0.0575177	0.0459109	0.0251649
467	0.0137188	0.0205116	0.0135898	0.00571925		0.0456096	0.0564991	0.0450788	0.0246771
468	0.0139211	0.0208117	0.0137944	0.00580749		0.0462839	0.0573169	0.0457531	0.0250501
469	0.0140419	0.0209892	0.01392	0.00586314		0.0466713	0.0577903	0.0461548	0.025294
470	0.0136197	0.0203582	0.0135112	0.00569062		0.0452653	0.0560543	0.0447918	0.024548
471	0.0136391	0.0203842	0.0135234	0.00569851		0.0453227	0.0561117	0.0448205	0.0245767
472	0.0143961	0.0215158	0.0142722	0.00601253		0.0478334	0.0592251	0.0473026	0.0259397
473	0.0142407	0.0212841	0.0141193	0.00594875		0.0473169	0.0585938	0.0468004	0.0256527
474	0.0142574	0.0213207	0.014128	0.00594187		0.0474173	0.0587373	0.0468722	0.0256527
475	0.0144234	0.0215718	0.0142906	0.00600745		0.0479769	0.0594403	0.0474173	0.0259397
476	0.0140529	0.0210215	0.0139258	0.00584981		0.0467574	0.0579338	0.0462265	0.0252653
477	0.0141343	0.021149	0.0140094	0.00588006		0.0470443	0.0583068	0.0465135	0.0254088
478	0.014556	0.0217793	0.0144326	0.00605868		0.048436	0.0600285	0.0479051	0.0261836
479	0.0144849	0.0216702	0.0143639	0.00602993		0.0482064	0.0597272	0.0476756	0.0260688
480	0.0145297	0.0217359	0.0144122	0.00604918		0.0483499	0.0598994	0.0478191	0.0261549
481	0.0148402	0.0221956	0.0147255	0.00618596		0.0493542	0.0611332	0.0488377	0.0267431
482	0.0149618	0.0223658	0.01485	0.00624532		0.0497272	0.0615636	0.0492107	0.026987
483	0.0148306	0.0221563	0.0147213	0.00620192		0.0492538	0.0609324	0.0487373	0.0267718
484	0.0145578	0.0217432	0.0144486	0.006093		0.0483212	0.0597702	0.0478191	0.026284
485	0.0138889	0.0207379	0.0137904	0.0058198		0.0460831	0.0570012	0.045624	0.0250932
486	0.012167	0.0181592	0.0120782	0.00510298		0.0403585	0.0498851	0.0399425	0.0219942
487	0.0127861	0.0190759	0.0126916	0.00536865		0.0423815	0.0523815	0.0419511	0.0231276
488	0.0140335	0.0209404	0.0139271	0.00588753		0.0465278	0.0575177	0.0460544	0.0253658
489	0.0140797	0.0210185	0.0139729	0.00589823		0.0467143	0.0577616	0.0462265	0.0254232
490	0.0148742	0.0221939	0.0147622	0.00623958		0.0493112	0.0609467	0.048809	0.0268866
491	0.0146759	0.0218894	0.0145669	0.00616324		0.0486225	0.0600715	0.0481204	0.0265422
492	0.0138873	0.0207114	0.013785	0.00583331		0.0460113	0.0568434	0.0455379	0.0251219
493	0.0143667	0.0214272	0.0142606	0.00603495		0.0476039	0.058809	0.0471017	0.025997
494	0.0145262	0.0216651	0.0144178	0.00609904		0.0481347	0.0594546	0.0476326	0.0262696
495	0.0146761	0.0218878	0.0145661	0.00616312		0.0486225	0.0600715	0.0481204	0.0265422
496	0.0147937	0.0220648	0.014684	0.00621226		0.0490099	0.0605593	0.0485077	0.0267574
497	0.01507	0.0224761	0.0149627	0.00633026		0.0499281	0.0616784	0.0494116	0.0272739
498	0.0144146	0.0214949	0.0143156	0.00605767		0.0477473	0.0589668	0.0472739	0.0260975
499	0.0146392	0.0218319	0.0145424	0.00614913		0.0484934	0.0598994	0.0480199	0.0264992
500	0.0142443	0.021251	0.0141583	0.00598193		0.0472165	0.0583212	0.0467717	0.0257962
501	0.0139999	0.0208968	0.0139225	0.0058742		0.0464274	0.0573886	0.0460113	0.0253514
502	0.0138003	0.020618	0.0137541	0.00579153		0.0458248	0.0566856	0.0454948	0.0250214
503	0.0143579	0.0214733	0.0143469	0.0060279		0.0477473	0.0591103	0.0474891	0.0260688
504	0.0138887	0.0208338	0.0140796	0.00589752		0.04637	0.0575751	0.0466713	0.0255379
505	0.0145323	0.0217482	0.0145275	0.0060915		0.0483643	0.0599137	0.0481204	0.0263701
506	0.015031	0.0224949	0.0150685	0.00632536		0.0500285	0.0619654	0.0498851	0.0273744
507	0.0143271	0.0214406	0.0143824	0.00604171		0.0476756	0.0590529	0.0476039	0.0261405
508	0.0139283	0.0208262	0.0139546	0.0058705		0.0462983	0.0573169	0.0461548	0.0253801
509	0.0143511	0.0214483	0.0143497	0.00604081		0.0476756	0.0589955	0.047446	0.0260975
510	0.0143074	0.0213737	0.0142851	0.00601756		0.0475034	0.0587516	0.0472165	0.025997
511	0.0147493	0.0220186	0.0146914	0.00619397		0.0489238	0.0604733	0.0485364	0.0267431
512	0.014953	0.0223173	0.0148834	0.00627706		0.0495838	0.0612767	0.0491677	0.0271018
513	0.0141969	0.0211845	0.0141286	0.00596124		0.0470587	0.058149	0.0466569	0.0257244
514	0.0141362	0.0210895	0.0140666	0.00593781		0.0468435	0.0578621	0.0464417	0.025624
515	0.0140277	0.0209279	0.0139607	0.00589393		0.0464848	0.0574173	0.0460831	0.0254375
516	0.0140268	0.0209262	0.0139599	0.00589196		0.0464848	0.0574173	0.0460831	0.0254375
517	0.012491	0.0186331	0.0124334	0.0052498		0.0413772	0.0511189	0.0410329	0.0226542
518	0.0131499	0.0196216	0.0130914	0.00552419		0.0435723	0.0538305	0.0432136	0.023845
519	0.0138109	0.0206069	0.0137498	0.0057996		0.0457674	0.0565421	0.0453944	0.0250358
520	0.0143384	0.021397	0.0142764	0.00601893		0.0475321	0.0587229	0.0471448	0.025997
521	0.0145088	0.0216534	0.0144479	0.00609037		0.0480917	0.0594259	0.0477043	0.0263127
522	0.0145518	0.0217202	0.0144932	0.00610633		0.0482495	0.0596268	0.0478621	0.0263844
523	0.0143205	0.0213776	0.0142662	0.00600799		0.0474891	0.0586799	0.0471161	0.0259683
524	0.0148521	0.0221823	0.0148131	0.00623175		0.0492825	0.0609324	0.0489381	0.026944
525	0.0150318	0.0224677	0.0149981	0.00629655		0.0499281	0.0617645	0.0495981	0.0272596
526	0.0143949	0.0215189	0.0143562	0.00602162		0.0478191	0.0591677	0.0474747	0.0260831
527	0.0135891	0.0203256	0.0135675	0.0056847		0.0451792	0.0559109	0.0448922	0.0246341
528	0.0144042	0.0215504	0.0143752	0.00601463		0.0479051	0.0592968	0.0475895	0.0260831
529	0.0152086	0.0227623	0.0151854	0.00634808		0.0506024	0.062654	0.0502868	0.0275465
530	0.0150198	0.0224856	0.0150005	0.00626743		0.0499855	0.061908	0.0496842	0.0272022
531	0.0152745	0.022871	0.0152591	0.00637127		0.0508463	0.062984	0.050545	0.0276757
532	0.0147774	0.022131	0.0147649	0.00616234		0.0491964	0.0609467	0.0489095	0.0267718
533	0.0143771	0.0215293	0.0143634	0.00599538		0.0478621	0.0592824	0.0475752	0.0260401
534	0.0148393	0.0222174	0.0148265	0.00619193		0.0493829	0.0611619	0.049096	0.0268866
535	0.015197	0.022746	0.0151824	0.00634587		0.0505594	0.0625966	0.0502581	0.0275465
536	0.0153656	0.0229935	0.0153495	0.00641814		0.0511046	0.0632566	0.0508033	0.0278478
537	0.0147888	0.022127	0.014774	0.00618081		0.0491677	0.0608606	0.0488808	0.0268148
538	0.0150697	0.0225466	0.0150596	0.00630085		0.0501003	0.0620227	0.0498133	0.0273313
539	0.0149695	0.0223973	0.0149664	0.00626235		0.0497703	0.0616067	0.049512	0.0271735
540	0.0143711	0.0215058	0.0143923	0.00602228		0.0477904	0.0591677	0.0476039	0.0261262
541	0.0144548	0.0216519	0.0145392	0.00607751		0.0481347	0.0596411	0.048106	0.0263844
542	0.0149208	0.0223604	0.0150154	0.00626923		0.0497129	0.0616354	0.0497129	0.0272309
543	0.0148378	0.0222171	0.0148711	0.00621178		0.0493829	0.0611619	0.0492107	0.0269727
544	0.0150925	0.0226165	0.0151778	0.00633475		0.0502724	0.062324	0.0502437	0.0275178
545	0.0150789	0.0225949	0.015141	0.00631675		0.0502294	0.0622523	0.050129	0.0274461
546	0.0151323	0.0226933	0.0152484	0.00635615		0.0504589	0.0625966	0.050502	0.0276326
547	0.0151819	0.0227546	0.0152455	0.00635531		0.0505881	0.0627114	0.0504876	0.0276326
548	0.0150351	0.0225301	0.0150765	0.00628459		0.0500859	0.0620658	0.0499281	0.027317
549	0.0151237	0.022656	0.0151539	0.0063192		0.0503585	0.0623958	0.050172	0.0274748
550	0.0153504	0.0229914	0.0153812	0.0064176		0.0510902	0.0632996	0.0509037	0.0278909
551	0.0152072	0.0227735	0.0152311	0.00635669		0.0506024	0.0626827	0.0504016	0.0276183
552	0.0153464	0.0229805	0.0153641	0.00641097		0.0510615	0.0632423	0.0508463	0.0278622
553	0.0150933	0.0226071	0.0151116	0.00630288		0.0502294	0.0622236	0.0500142	0.0274031
554	0.0154868	0.0231973	0.0155047	0.00646447		0.0515493	0.0638592	0.0513198	0.0281061
555	0.0155472	0.0232903	0.0155661	0.0064876		0.0517502	0.0641174	0.051535	0.0282065
556	0.0153718	0.0230322	0.0153949	0.00641252		0.0511763	0.0634144	0.0509611	0.0278909
557	0.0149189	0.0223603	0.0149432	0.00622069		0.0496842	0.061578	0.0494833	0.0270731
558	0.0148303	0.0222341	0.0148567	0.00617771		0.0494116	0.0612624	0.0492251	0.0269009
559	0.0145784	0.0218668	0.014609	0.00606837		0.0486082	0.0602724	0.0484216	0.0264418
560	0.0147922	0.0221908	0.0148282	0.00615451		0.0493255	0.0611906	0.0491534	0.0268292
561	0.0150152	0.0225326	0.0150584	0.00624406		0.0500859	0.0621375	0.0499281	0.0272309
562	0.0149324	0.0224191	0.0149809	0.00620431		0.049842	0.0618649	0.0496985	0.0270731
563	0.0153653	0.0230796	0.0154209	0.00637749		0.0513198	0.0637157	0.0511906	0.0278478
564	0.0149655	0.0224902	0.0150235	0.00620467		0.0500142	0.0621232	0.0498851	0.0271161
565	0.0148672	0.0223482	0.0149272	0.00615989		0.0496985	0.0617502	0.0495838	0.0269296
566	0.0146857	0.0220813	0.0147517	0.00608529		0.049096	0.0610184	0.0490099	0.026614
567	0.014986	0.0225417	0.015065	0.006207		0.050129	0.062324	0.0500716	0.0271592
568	0.0148267	0.0223345	0.0149734	0.00615433		0.0496985	0.0618649	0.0498133	0.0269583
569	0.0143792	0.0217247	0.0147101	0.00602545		0.048393	0.0604159	0.0490099	0.0264418
570	0.0144653	0.0218376	0.0147052	0.0060215		0.0486369	0.0606598	0.0490099	0.0264275
571	0.014482	0.0218355	0.0146024	0.00597846		0.0486082	0.0605593	0.0486512	0.0262409
572	0.0147978	0.0223516	0.0150159	0.00613263		0.0497846	0.0621375	0.0500859	0.0269583
573	0.0150063	0.0226655	0.015207	0.00620598		0.0504876	0.0629984	0.0507459	0.0272883
574	0.0150009	0.022662	0.0151855	0.00619301		0.0504733	0.0629984	0.0506885	0.0272452
575	0.0147481	0.0222856	0.0149311	0.0060823		0.0496412	0.0619797	0.0498564	0.0267718
576	0.0146568	0.0221424	0.014815	0.00603621		0.0493255	0.0615636	0.049469	0.0265709
577	0.0148501	0.0224271	0.0149948	0.00611087		0.0499568	0.0623384	0.0500572	0.0268866
578	0.0146801	0.0221525	0.0147829	0.00603304		0.0493255	0.0615063	0.0493255	0.0265279
579	0.0147762	0.0222728	0.0148556	0.00607638		0.0495838	0.0617645	0.0495264	0.0266857
580	0.0150805	0.0227047	0.0151604	0.00622403		0.0505163	0.0628549	0.0504589	0.0272883
581	0.0151902	0.0228476	0.0152648	0.00628656		0.0508176	0.0631705	0.0507315	0.0275178
582	0.0155073	0.0233035	0.0155869	0.00643697		0.0518076	0.0643613	0.0517358	0.0281348
583	0.0155781	0.0233904	0.0156593	0.0064821		0.0519941	0.0645335	0.0519224	0.0282926
584	0.0157303	0.0236104	0.0158241	0.00656065		0.0524675	0.0651074	0.0524245	0.0286226
585	0.0153619	0.0230526	0.0154583	0.00641336		0.0512337	0.0635579	0.051205	0.0279626
586	0.0150396	0.0225761	0.0151687	0.00629428		0.050172	0.0622667	0.0502437	0.0274461
587	0.0153196	0.0230239	0.0155398	0.0064411		0.051205	0.0636153	0.0514919	0.0281061
588	0.01472	0.0222273	0.0152755	0.00630522		0.049512	0.0618075	0.0507172	0.0275609
589	0.0127273	0.0193726	0.0137116	0.0056031		0.0432567	0.0544331	0.0457387	0.0246197
590	0.0133332	0.0202874	0.014345	0.005865		0.0453083	0.0569869	0.0478334	0.0257675
591	0.0143077	0.0216864	0.0151192	0.0062168		0.0483786	0.0606167	0.0502868	0.0272309
592	0.0140777	0.021378	0.0150159	0.00615194		0.0477043	0.059885	0.0500142	0.0270013
593	0.0144929	0.0219296	0.0151991	0.00624926		0.0488664	0.0611332	0.050545	0.0273744
594	0.0143953	0.0218001	0.0151762	0.0062327		0.0485938	0.0608463	0.0504876	0.027317
595	0.013943	0.0211839	0.0148883	0.00609581		0.0472739	0.0593542	0.0495981	0.0267574
596	0.0147945	0.0223464	0.0153507	0.00632345		0.0497703	0.0621375	0.0509898	0.0276757
597	0.0146342	0.0221288	0.0152356	0.00626229		0.0492968	0.0616067	0.0506455	0.0274461
598	0.0146959	0.0221885	0.0152022	0.00626295		0.0493973	0.0616497	0.0504733	0.0274174
599	0.0147977	0.0223211	0.0152323	0.00628071		0.0496698	0.0619223	0.050545	0.0274748
600	0.0149439	0.0225016	0.0152427	0.00629493		0.0500429	0.0622667	0.050545	0.0275178
601	0.0149215	0.0224367	0.0151109	0.00624526		0.0498707	0.0619654	0.0500859	0.0272883
602	0.0148594	0.0223371	0.0150187	0.00620556		0.0496412	0.0616784	0.0497846	0.0271161
603	0.0151509	0.0227634	0.0152758	0.0063161		0.0505737	0.0628118	0.0506168	0.0275896
604	0.015431	0.0231781	0.0155398	0.00642669		0.0514919	0.0639309	0.0514919	0.0280774
605	0.0153935	0.0231117	0.0154865	0.00641025		0.0513341	0.0637157	0.0512911	0.0279913
606	0.01538	0.0230754	0.0154718	0.00641688		0.051248	0.0635579	0.051205	0.0279913
607	0.0155812	0.0233605	0.0156734	0.0065151		0.051865	0.0642896	0.0518219	0.0283787
608	0.0154507	0.0231486	0.0155372	0.00647134		0.0513772	0.0636583	0.0513198	0.0281635
609	0.015513	0.0232303	0.0155956	0.00650542		0.0515493	0.0638448	0.0514919	0.0282926
610	0.0154165	0.0230774	0.0154947	0.00647015		0.051205	0.0634001	0.0511333	0.0281204
611	0.0155333	0.0232407	0.0156063	0.00652431		0.0515637	0.0638161	0.0514776	0.0283356
612	0.0155048	0.0231907	0.0155703	0.00651355		0.0514632	0.0636727	0.0513485	0.0282782
613	0.0153342	0.0229275	0.0153919	0.00644444		0.050875	0.0629266	0.0507459	0.0279626
614	0.0151539	0.022648	0.0152077	0.00637498		0.0502437	0.0621232	0.0501146	0.027647
615	0.0155194	0.0231824	0.0155719	0.00653878		0.0514202	0.0635579	0.0512767	0.0283356
616	0.0150351	0.0224494	0.0150823	0.00633995		0.0497846	0.0615206	0.0496412	0.0274605
617	0.0150276	0.0224331	0.0150719	0.00634013		0.0497416	0.0614632	0.0495981	0.0274461
618	0.0156304	0.0233256	0.0156726	0.00659676		0.0517215	0.0638879	0.0515637	0.0285508
619	0.015499	0.0231235	0.0155362	0.00654326		0.0512767	0.0633283	0.0511046	0.0283069
620	0.0156051	0.0232849	0.0156377	0.00658218		0.0516354	0.0637874	0.0514489	0.0284791
621	0.0156168	0.0233123	0.0156399	0.00657237		0.0517215	0.0639022	0.0515063	0.0284648
622	0.0153217	0.0229077	0.0153358	0.00640977		0.0508607	0.062941	0.0506311	0.0278335
623	0.014978	0.0224307	0.0149844	0.00623061		0.049842	0.0617788	0.0495981	0.0271305
624	0.0148105	0.0221554	0.0148193	0.00618183		0.0492107	0.0609324	0.0489812	0.0268722
625	0.0149162	0.0222842	0.014928	0.00625291		0.049469	0.0611906	0.0492394	0.0271305
626	0.0151749	0.0226691	0.0152093	0.00637647		0.0503155	0.062238	0.0501433	0.027647
627	0.0153263	0.0229204	0.0154422	0.00646818		0.0509037	0.0630271	0.0509467	0.028063
628	0.0143255	0.021643	0.0145162	0.00589961		0.0482925	0.0603728	0.0485508	0.0260114
629	0.0150187	0.0225293	0.0151692	0.00629553		0.0501146	0.062238	0.0502581	0.0274461
630	0.0147738	0.0221485	0.01484	0.00615302		0.0492681	0.0611476	0.049182	0.0268435
631	0.0151762	0.0226652	0.0152088	0.00637677		0.0503298	0.0622523	0.0501577	0.0276613
632	0.0149566	0.0223367	0.0151133	0.0063629		0.0495981	0.0613341	0.0497416	0.0275322
633	0.0155119	0.0231139	0.0156214	0.00661201		0.0512767	0.0632853	0.0512911	0.0285221
634	0.0154226	0.0229483	0.0154891	0.00658008		0.0508607	0.0626971	0.0507746	0.0283356
635	0.0156807	0.0233176	0.0157621	0.00670998		0.0516785	0.0636727	0.0516211	0.0288521
636	0.0154962	0.0230272	0.0155604	0.0066361		0.0510185	0.0628262	0.0509181	0.0285078
637	0.015761	0.0234114	0.0158281	0.00675906		0.051865	0.0638448	0.0517645	0.0290243
638	0.0159657	0.0236905	0.0159915	0.00684371		0.0524532	0.0645048	0.0522523	0.0293399
639	0.0158244	0.0234672	0.0158552	0.00679876		0.051951	0.0638592	0.0517645	0.0291247
640	0.0157153	0.0232879	0.0157371	0.00676247		0.051535	0.0632996	0.0513341	0.0289239
641	0.0157347	0.0233071	0.0157618	0.00678316		0.0515637	0.0633283	0.0513772	0.0289956
642	0.0156996	0.0232401	0.0157117	0.00677287		0.0514059	0.0630988	0.0511763	0.0289239
643	0.0159102	0.0235542	0.0159567	0.00688329		0.0521089	0.0639596	0.0519654	0.029383
644	0.0158961	0.0235192	0.0159282	0.00688072		0.0520228	0.0638161	0.0518363	0.0293543
645	0.015903	0.0235421	0.0160022	0.00691365		0.0520945	0.0639453	0.0520802	0.0294834
646	0.0154004	0.0228576	0.0157221	0.00678316		0.0506311	0.062324	0.051205	0.0289526
647	0.0150149	0.0223875	0.015674	0.0067269		0.0496985	0.0614345	0.0511763	0.0287947
648	0.0149767	0.0223487	0.0157697	0.00677383		0.0496125	0.0614058	0.0514776	0.0289669
649	0.0147415	0.0219898	0.0154856	0.00664751		0.0488234	0.0603872	0.0505594	0.0284504
650	0.0151207	0.0224196	0.0154475	0.00668296		0.0496412	0.0610471	0.0502581	0.0284791
651	0.0158499	0.0234741	0.016112	0.00698228		0.051951	0.0638305	0.0523671	0.0297273
652	0.0148074	0.0220931	0.0156684	0.00674615		0.0490529	0.0607172	0.0510902	0.0288091
653	0.015675	0.0232102	0.0159606	0.00692346		0.0513628	0.0630988	0.051865	0.0294547
654	0.0155428	0.0230035	0.0157883	0.00685489		0.0509037	0.0625106	0.0512767	0.0291534
655	0.0148283	0.0220107	0.0153089	0.00661996		0.0487516	0.0600572	0.0498277	0.0282209
656	0.0132196	0.0195864	0.013527	0.005869		0.0433714	0.0533284	0.0439453	0.024964
657	0.0135728	0.0201102	0.0139044	0.00603603		0.0445336	0.0547487	0.0451648	0.0256671
658	0.0153268	0.0226611	0.0155467	0.00676056		0.050129	0.0615063	0.0504589	0.028723
659	0.0154552	0.0228452	0.0156077	0.00678525		0.0505307	0.0619797	0.0506742	0.0288378
660	0.0154655	0.0228708	0.0155797	0.00675458		0.0506024	0.0621088	0.0506455	0.0287517
661	0.0155002	0.022942	0.0154966	0.00667471		0.0507889	0.0623814	0.0505307	0.0285078
662	0.0154654	0.0229245	0.0153884	0.00658068		0.0507889	0.0624675	0.0503585	0.0282209
663	0.0152612	0.0225959	0.0152009	0.00652825		0.0500429	0.0614776	0.0496412	0.0279339
664	0.0156297	0.0230779	0.0155642	0.00674143		0.0510328	0.0625536	0.0506311	0.0287087
665	0.0157578	0.0232283	0.0156902	0.00683295		0.0513198	0.0628118	0.0509037	0.0290099
666	0.0158878	0.023391	0.0158141	0.00691413		0.0516498	0.0631275	0.0512193	0.0292825
667	0.0159573	0.0234686	0.0158798	0.00696614		0.0517932	0.0632423	0.0513485	0.0294547
668	0.0160257	0.0235512	0.0159335	0.00700434		0.051951	0.0634001	0.0514776	0.0295695
669	0.0163089	0.0239562	0.0162186	0.0071404		0.0528406	0.0644474	0.0523671	0.030129
670	0.0162772	0.0239012	0.0161809	0.00713131		0.0527114	0.0642753	0.0522236	0.0300716
671	0.016304	0.0239324	0.016206	0.00714757		0.0527688	0.0643326	0.052281	0.0301147
672	0.0161937	0.0237658	0.0160928	0.00710232		0.0523958	0.0638735	0.0518937	0.0299138
673	0.0164661	0.0241585	0.0163615	0.0072266		0.0532566	0.0649065	0.0527401	0.0304303
674	0.0164339	0.024105	0.0163295	0.00721799		0.0531275	0.0647344	0.0526254	0.0303729
675	0.0163107	0.0239197	0.016206	0.00716885		0.0527114	0.0642322	0.0522093	0.0301577
676	0.0164478	0.0241157	0.0163405	0.00723222		0.0531419	0.0647344	0.0526254	0.030416
677	0.0163074	0.0239053	0.0161978	0.00717334		0.0526828	0.0641605	0.0521663	0.0301577
678	0.0163726	0.0239978	0.0162611	0.00720365		0.0528836	0.0644044	0.0523528	0.0302725
679	0.0161328	0.0236435	0.0160225	0.00710178		0.0520945	0.0634288	0.051578	0.0298421
680	0.0162888	0.0238689	0.0161782	0.00717519		0.0525823	0.0640314	0.0520658	0.0301434
681	0.0162104	0.0237494	0.0161053	0.00714494		0.0523241	0.0637014	0.0518219	0.0299999
682	0.0162171	0.0237583	0.0161174	0.00715427		0.0523384	0.0637157	0.0518506	0.0300286
683	0.0162107	0.0237469	0.0161163	0.00715714		0.0523097	0.063687	0.0518363	0.0300429
684	0.0161491	0.0236553	0.0160652	0.00713532		0.0521089	0.0634431	0.0516641	0.0299425
685	0.0163245	0.0239058	0.0162295	0.00721279		0.0526541	0.0640887	0.0521806	0.0302581
686	0.0162423	0.0237899	0.016159	0.00717938		0.0524102	0.0638018	0.0519654	0.030129
687	0.0110082	0.017179	0.0109705	0.00399251		0.0388664	0.0501577	0.0385938	0.0185365
688	0.0128037	0.0194665	0.0127284	0.00500172		0.0436871	0.05505	0.0432997	0.0224389
689	0.0128602	0.0195344	0.0127923	0.00504111		0.0438306	0.0551935	0.0434575	0.0225824
690	0.0134655	0.020286	0.0134073	0.00542179		0.0453801	0.0567	0.0450214	0.0239741
691	0.0141095	0.021079	0.0141151	0.00587683		0.0469726	0.0582494	0.0467717	0.0255953
692	0.0144309	0.0214547	0.0147015	0.00627634		0.0476899	0.0588807	0.0481634	0.0269583
693	0.0138408	0.0206872	0.014837	0.00636739		0.0460544	0.0571734	0.0484934	0.0272596
694	0.0135217	0.0202234	0.0149077	0.00642573		0.044964	0.0559252	0.0486512	0.0274174
695	0.0143757	0.0213267	0.0153849	0.00673139		0.0472595	0.0583068	0.0498564	0.0284791
696	0.0144184	0.0213778	0.0154537	0.00676367		0.04736	0.0584073	0.0500859	0.0285939
697	0.0158016	0.023212	0.016101	0.00716192		0.0512337	0.0625679	0.0517645	0.0300286
698	0.0155529	0.0228531	0.0158884	0.00706627		0.0504589	0.0616354	0.0510759	0.0296269
699	0.0148496	0.0219728	0.015739	0.0069289		0.0486512	0.0598707	0.0508607	0.0292108
700	0.0146664	0.0217093	0.0155773	0.00685818		0.0480773	0.059182	0.0503298	0.0289239
701	0.0143708	0.0213486	0.0155017	0.00680599		0.0473743	0.0584933	0.0501433	0.0287517
702	0.0146339	0.0216703	0.0155595	0.006858		0.0480199	0.0591246	0.0502437	0.0289095
703	0.0147305	0.0217897	0.0156196	0.00688586		0.0482208	0.0593398	0.0504302	0.0290099
704	0.0154456	0.0227473	0.0160194	0.00710561		0.0502437	0.0615493	0.051578	0.0298277
705	0.0153705	0.0226732	0.0160932	0.00714793		0.0501577	0.0615206	0.0517789	0.0299856
706	0.015505	0.0228211	0.0160431	0.00713944		0.0504446	0.0617358	0.051578	0.0299138
707	0.0155436	0.0228684	0.0160698	0.00716108		0.0505307	0.0618219	0.0516211	0.0299856
708	0.0156001	0.0229543	0.0161291	0.00718607		0.0507315	0.0620801	0.0518219	0.0301003
709	0.0158253	0.0232071	0.0161015	0.00719851		0.0511906	0.0624388	0.0516498	0.030086
710	0.01574	0.0231241	0.0161611	0.00721381		0.0510759	0.0623958	0.0518793	0.0301864
711	0.0158108	0.023197	0.0161359	0.00721106		0.051205	0.0624675	0.0517645	0.0301434
712	0.0158617	0.0232384	0.0160806	0.00719946		0.0512337	0.0624388	0.0515493	0.0300573
713	0.0156504	0.0229617	0.0159721	0.00713968		0.0506742	0.0618362	0.0512337	0.0298421
714	0.0157502	0.0230975	0.0160531	0.00718141		0.0509611	0.0621519	0.0514776	0.0299999
715	0.0150706	0.0221823	0.0156578	0.00698019		0.0490386	0.0600285	0.0502868	0.0292252
716	0.0150145	0.0221251	0.0157306	0.007009		0.0489381	0.0599711	0.050545	0.0293543
717	0.0118078	0.0179562	0.0144383	0.00615547		0.040172	0.0508176	0.0473743	0.0263988
718	0.0105225	0.0161452	0.0136069	0.00578938		0.0361548	0.0462122	0.0447488	0.0248062
719	0.00969875	0.01488	0.012545	0.00528495		0.0332997	0.0425824	0.0414489	0.0227546
720	0.0100415	0.015486	0.0131582	0.00553113		0.0347488	0.0446197	0.0435149	0.0238593
721	0.011901	0.0179409	0.0139747	0.006023		0.0399999	0.050215	0.0456526	0.0256527
722	0.0144391	0.0213651	0.0154279	0.00682829		0.04736	0.0582925	0.0497272	0.0287087
723	0.013015	0.0194639	0.014722	0.00642633		0.043271	0.0538736	0.0477904	0.0271879
724	0.0112651	0.0170698	0.013637	0.00584091		0.038106	0.0480917	0.0446914	0.0249497
725	0.0108154	0.0165118	0.0136087	0.00581335		0.0369439	0.0469726	0.0446627	0.0248636
726	0.0115293	0.0175019	0.0140955	0.00601815		0.039096	0.0494259	0.0462409	0.0257818
727	0.0119599	0.0180442	0.0141887	0.0061315		0.0402294	0.0505594	0.0462983	0.0260688
728	0.0109223	0.016617	0.0135975	0.00576905		0.0371448	0.047073	0.0447631	0.0247632
729	0.011802	0.0177374	0.013825	0.00596208		0.0394977	0.0494403	0.0451648	0.0253801
730	0.0123751	0.0186691	0.0145922	0.00630749		0.0416641	0.0522954	0.0475752	0.0268722
731	0.0117785	0.0177981	0.0141097	0.00606108		0.0397273	0.0499711	0.0461548	0.0258679
732	0.0131188	0.0195831	0.0147895	0.00646017		0.0435006	0.0540744	0.0480056	0.0273313
733	0.0143448	0.021216	0.0153666	0.00681334		0.0470013	0.0578334	0.0494977	0.0286082
734	0.0148626	0.0219112	0.0156778	0.00698043		0.0484503	0.0594403	0.0504016	0.0292395
735	0.014488	0.0213995	0.0154153	0.00684939		0.04736	0.0582064	0.0495981	0.028723
736	0.0144548	0.0213642	0.0154077	0.00684861		0.0473313	0.0581921	0.0495694	0.028723
737	0.0145408	0.021487	0.0155059	0.00688938		0.0475895	0.0584933	0.0498994	0.0288952
738	0.0150633	0.0221151	0.0156013	0.0070053		0.0488377	0.0596555	0.0499568	0.0291965
739	0.0147908	0.0217128	0.0153315	0.00688574		0.0479195	0.0585364	0.049096	0.0286943
740	0.0153474	0.0224676	0.0156843	0.00706221		0.0495264	0.0603298	0.0501577	0.029383
741	0.0153001	0.0223658	0.0155079	0.00699322		0.0492538	0.0599137	0.0495551	0.0290673
742	0.0154332	0.02252	0.0155107	0.00700601		0.0495551	0.060172	0.0495264	0.029096
743	0.0158809	0.0231613	0.0159141	0.00719253		0.0509467	0.0618362	0.0508033	0.0298564
744	0.0159207	0.0231958	0.0158674	0.0071777		0.0509898	0.0618219	0.0506311	0.0297847
745	0.0160005	0.0232931	0.0158731	0.00718583		0.051162	0.0619797	0.0506311	0.029799
746	0.0160953	0.0234311	0.0159686	0.00722887		0.0514632	0.0623527	0.0509324	0.0299856
747	0.0161682	0.0235317	0.0160207	0.0072541		0.0516785	0.0625966	0.0510902	0.030086
748	0.0161636	0.0235214	0.0160089	0.00724992		0.0516498	0.0625536	0.0510472	0.0300573
749	0.0160068	0.0232908	0.0158463	0.0071777		0.0511476	0.0619367	0.0505307	0.029756
750	0.0160205	0.0233099	0.015859	0.007185		0.0511763	0.0619797	0.0505594	0.0297847
751	0.0158818	0.0231049	0.015719	0.00712306		0.0507315	0.0614202	0.0501146	0.0295264
752	0.0159749	0.0232388	0.0158084	0.00716539		0.0510185	0.0617788	0.0503872	0.0296986
753	0.0160833	0.023392	0.0159087	0.00721345		0.0513485	0.0621662	0.0507028	0.0298851
754	0.0161393	0.0234725	0.0159676	0.00724107		0.051535	0.0623814	0.0508894	0.0299999
755	0.0160668	0.0233682	0.0158997	0.00721058		0.0513054	0.0621088	0.0506742	0.0298708
756	0.0160908	0.0233994	0.0159125	0.00721787		0.0513628	0.0621806	0.0507172	0.0298995
757	0.0161365	0.023466	0.0159575	0.0072382		0.0515063	0.0623527	0.0508607	0.0299856
758	0.0159589	0.0232095	0.0157809	0.00715534		0.0509467	0.0616784	0.0503011	0.0296412
759	0.0156583	0.0228284	0.0154819	0.00695293		0.050215	0.0609324	0.0495694	0.0289813
760	0.00308364	0.00589395	0.00305499	0.000622583		0.0133443	0.0209182	0.0131922	0.00339884
761	0.00178215	0.00375013	0.00176659	0.00028182		0.00828692	0.0142697	0.00819796	0.00158106
762	0.00829802	0.0133694	0.00820953	0.0026898		0.0305021	0.0405738	0.0301147	0.0130573
763	0.00447198	0.00802126	0.00442832	0.00106985		0.0183357	0.0270157	0.0181205	0.00566426
764	0.0064253	0.0108314	0.00635806	0.00182699		0.0248206	0.0344475	0.0245049	0.00925822
765	0.00833494	0.0134318	0.0082453	0.00269777		0.0306599	0.0407746	0.0302725	0.0131061
766	0.0100689	0.0156201	0.0099603	0.00364854		0.0353657	0.0454231	0.034921	0.016944
767	0.012607	0.0189582	0.0124689	0.00503011		0.0424532	0.0530127	0.041908	0.0223098
768	0.014525	0.0213789	0.0143627	0.00622804		0.0473456	0.0579625	0.0467287	0.0265279
769	0.0148478	0.0217526	0.0146816	0.00647254		0.0480199	0.0585507	0.047403	0.0272883
770	0.0153726	0.02241	0.0152012	0.00682751		0.0492968	0.0598133	0.0486655	0.0284648
771	0.0155184	0.0225748	0.0153451	0.00694946		0.0495694	0.0600285	0.0489381	0.0288091
772	0.0155728	0.0226375	0.0153988	0.00699274		0.0496842	0.0601289	0.0490529	0.0289382
773	0.0157026	0.0228237	0.0155276	0.00705659		0.0500859	0.0606024	0.0494403	0.0291965
774	0.0156468	0.0227404	0.0154737	0.00703519		0.0498994	0.0603585	0.0492681	0.029096
775	0.015548	0.0225956	0.0153763	0.00699513		0.0495694	0.0599711	0.0489381	0.0289239
776	0.0157577	0.0228993	0.0155848	0.00709018		0.0502437	0.0607745	0.0495981	0.0293112
777	0.0155709	0.0226275	0.0154005	0.00700697		0.0496412	0.0600428	0.0490099	0.0289669
778	0.0154945	0.0225182	0.015329	0.00697326		0.0493973	0.0597559	0.0487803	0.0288234
779	0.0155279	0.0225648	0.0153625	0.00698916		0.0494977	0.059885	0.0488951	0.0288952
780	0.0154626	0.022469	0.0152968	0.00696034		0.0492968	0.0596268	0.0486799	0.028766
781	0.015499	0.0225225	0.0153326	0.0069784		0.0494116	0.0597559	0.0487947	0.0288378
782	0.015616	0.0226912	0.0154491	0.00703471		0.0497703	0.0602007	0.0491534	0.0290673
783	0.0153665	0.0223236	0.0152006	0.0069228		0.0489668	0.0592251	0.0483499	0.0285939
784	0.0154622	0.0224599	0.015293	0.00696847		0.0492681	0.0595694	0.0486369	0.0287804
785	0.0153329	0.0222823	0.0152135	0.00693021		0.0488951	0.0591533	0.048393	0.0286226
786	0.0154928	0.0225256	0.0154106	0.00701905		0.0494403	0.059842	0.0490242	0.0289956
787	0.0150417	0.021955	0.0152455	0.00691061		0.0483069	0.0586942	0.0486082	0.0286369
788	0.0147771	0.0216104	0.0151197	0.00683785		0.0476039	0.0579338	0.0482495	0.0283787
789	0.0147073	0.0215278	0.0151703	0.0068641		0.0474604	0.057819	0.0484216	0.0284648
790	0.0141493	0.0208012	0.0149029	0.00668619		0.0459252	0.0562122	0.0477473	0.0278765
791	0.0144864	0.0212037	0.0149398	0.00675888		0.0467287	0.0569439	0.0476899	0.0280343
792	0.0144509	0.0211322	0.0148343	0.00671746		0.0465278	0.0566569	0.0473313	0.0278335
793	0.0142065	0.0207869	0.0146287	0.00662073		0.0457818	0.0557817	0.0467	0.0274461
794	0.0147872	0.0215017	0.0147455	0.00672116		0.0472021	0.0571447	0.0469008	0.0277474
795	0.0149649	0.0217976	0.0150526	0.00684987		0.0479051	0.0580916	0.0479195	0.0283069
796	0.0141531	0.0207676	0.0147898	0.00665768		0.0458392	0.0559969	0.0473169	0.0277044
797	0.0141467	0.0207851	0.0148282	0.00667466		0.0458965	0.0561117	0.0474317	0.0277761
798	0.01493	0.0217725	0.0151174	0.00687426		0.0478908	0.058149	0.0481347	0.0284217
799	0.0147848	0.0215904	0.015078	0.00684401		0.0475178	0.057776	0.0480486	0.0283213
800	0.0144358	0.0211247	0.0148848	0.00674107		0.0465565	0.0567286	0.0474891	0.0279339

## Sheet: 40degS
40 degrees S latitude	Daily Irradiance (mE cm-2 d-1 nm-1)					Solar Noon Irradiance (mE cm-2 d-1 nm-1)
wavelength (nm)	March 20th	June 21st	September 22nd	December 22nd		March 20th	June 21st	September 22nd	December 22nd
280	7.01233e-21	2.54492e-22	1.44939e-22	3.24727e-19		4.80486e-20	1.92539e-21	1.67431e-23	4.10185e-18
281	2.86764e-19	1.40292e-21	3.04374e-21	1.37118e-17		2.21377e-18	5.57817e-21	1.27001e-21	1.66427e-16
282	1.60635e-17	5.2223e-20	2.1825e-20	6.58658e-16		1.29512e-16	2.24676e-19	1.43758e-19	7.59395e-15
283	1.7078e-16	4.77503e-19	2.33339e-19	4.75881e-15		1.63271e-15	2.04303e-18	1.72453e-18	5.32423e-14
284	2.89869e-15	1.27785e-17	6.20903e-18	7.32828e-14		2.90673e-14	5.17932e-17	4.87803e-17	7.59251e-13
285	1.00488e-14	3.5957e-17	4.70994e-17	2.4461e-13		1.02223e-13	1.59684e-16	4.40458e-16	2.44045e-12
286	1.80285e-13	6.99472e-16	1.30671e-15	4.45492e-12		1.84074e-12	3.10472e-15	1.27977e-14	4.37014e-11
287	1.46599e-12	7.7171e-15	1.9187e-14	2.96784e-11		1.50358e-11	3.39597e-14	1.91821e-13	2.75609e-10
288	1.45647e-11	5.8583e-14	2.4846e-13	2.16057e-10		1.45624e-10	2.55953e-13	2.51793e-12	1.88235e-09
289	1.22447e-10	4.59109e-13	2.96506e-12	1.52749e-09		1.2e-09	2.05882e-12	2.99138e-11	1.27503e-08
290	8.86277e-10	3.53077e-12	3.33972e-11	9.94735e-09		8.33857e-09	1.60401e-11	3.2898e-10	7.90815e-08
291	3.48257e-09	1.38706e-11	1.80837e-10	3.13351e-08		3.13629e-08	6.33283e-11	1.74031e-09	2.38737e-07
292	1.97578e-08	7.34503e-11	1.35678e-09	1.3113e-07		1.67001e-07	3.51075e-10	1.235e-08	9.43756e-07
293	5.60359e-08	2.09931e-10	4.74503e-09	2.99977e-07		4.5007e-07	1.05538e-09	4.12911e-08	2.08177e-06
294	1.60715e-07	7.25554e-10	2.16214e-08	7.81166e-07		1.19483e-06	3.87947e-09	1.76183e-07	5.12337e-06
295	4.03099e-07	1.75707e-09	7.08528e-08	1.67629e-06		3.02725e-06	1.03041e-08	5.75464e-07	1.04089e-05
296	1.40632e-06	7.97277e-09	2.72242e-07	5.20132e-06		1.01047e-05	4.79769e-08	2.09182e-06	3.06599e-05
297	2.09196e-06	1.50033e-08	4.75794e-07	7.12793e-06		1.44906e-05	9.29983e-08	3.52797e-06	4.03585e-05
298	6.41704e-06	6.20951e-08	1.73956e-06	1.98596e-05		4.23815e-05	4.01146e-07	1.23342e-05	0.000107173
299	1.20203e-05	1.45515e-07	3.64239e-06	3.47303e-05		7.63125e-05	9.71015e-07	2.49497e-05	0.000180918
300	1.68254e-05	2.7848e-07	5.95747e-06	4.56418e-05		0.000100559	1.94547e-06	3.88377e-05	0.000226972
301	3.40759e-05	9.0078e-07	1.44375e-05	9.01436e-05		0.000196126	6.65708e-06	8.92536e-05	0.000429123
302	3.56469e-05	1.15002e-06	1.78839e-05	9.15904e-05		0.000200717	8.55521e-06	0.000105294	0.000424102
303	0.000107222	4.29229e-06	5.66537e-05	0.000254313		0.000576325	3.1492e-05	0.000322381	0.00112912
304	0.000113559	5.32686e-06	6.25779e-05	0.000263197		0.000596411	3.84217e-05	0.000348923	0.00114347
305	0.000205413	1.33206e-05	0.000121916	0.000445564		0.00102597	9.22952e-05	0.000646626	0.00185078
306	0.000202637	1.53758e-05	0.000125698	0.000428929		0.000986223	0.000104189	0.000649065	0.00173888
307	0.000347388	3.0693e-05	0.000208923	0.000648866		0.00161979	0.000200573	0.00103629	0.00253945
308	0.000419515	4.97354e-05	0.000274323	0.00084215		0.00191965	0.000313198	0.00131621	0.00318363
309	0.000404196	5.1802e-05	0.000302409	0.000800496		0.00182209	0.000319942	0.00141219	0.00298277
310	0.000421998	6.32342e-05	0.000326968	0.000810124		0.00184217	0.000375178	0.00147919	0.00292969
311	0.000819854	0.00013091	0.000646691	0.00155837		0.00353227	0.000763699	0.00288234	0.00556383
312	0.000744805	0.000132165	0.00060194	0.00138666		0.00313342	0.000749065	0.00261836	0.00484073
313	0.000926591	0.000179327	0.000766264	0.00170047		0.00382065	0.000991101	0.00326111	0.00582351
314	0.00110408	0.000222677	0.000922439	0.00201006		0.00450644	0.00121606	0.00388234	0.00681633
315	0.00120514	0.000270477	0.00103331	0.00215203		0.00478908	0.00142869	0.0042238	0.00711619
316	0.000868578	0.000200788	0.000750491	0.00154275		0.00342467	0.00105093	0.0030416	0.00506168
317	0.00149413	0.000367372	0.00131149	0.00262604		0.00579338	0.00188378	0.00521806	0.00848204
318	0.00119782	0.000301839	0.00105832	0.00209606		0.00461261	0.00153515	0.00417789	0.00672595
319	0.00165872	0.00047363	0.00150155	0.00283574		0.0061621	0.00230272	0.00570012	0.00887085
320	0.00170117	0.000448914	0.00152412	0.00295794		0.00646483	0.0022482	0.00592394	0.00939739
321	0.00178188	0.000542675	0.00161403	0.00295395		0.00651648	0.0025581	0.0059555	0.00905736
322	0.0018587	0.000534055	0.00169916	0.00318895		0.00688807	0.00259397	0.00641892	0.00993397
323	0.00156915	0.000477617	0.00144651	0.00265872		0.00571304	0.00226972	0.00536297	0.00817357
324	0.00217147	0.000706041	0.00205259	0.00364742		0.00779911	0.00324676	0.00744187	0.0109254
325	0.00197037	0.000604129	0.00182901	0.00334535		0.00715636	0.00286369	0.00675177	0.0102467
326	0.0029933	0.000979343	0.00283779	0.00502422		0.0107274	0.00449353	0.0102611	0.0150071
327	0.00296535	0.000988501	0.00283034	0.00496915		0.0105638	0.00449783	0.0101607	0.0147489
328	0.0026258	0.000827281	0.00247816	0.00444718		0.0095136	0.00386512	0.00906023	0.0134045
329	0.00317717	0.00109515	0.00305218	0.0052882		0.011198	0.00490816	0.0108292	0.015538
330	0.00363666	0.00125526	0.00350374	0.0060621		0.0128091	0.00562408	0.012416	0.0177905
331	0.00302724	0.00100328	0.00289342	0.0050817		0.0107962	0.00458535	0.0103945	0.0150789
332	0.00325541	0.00114016	0.00314442	0.00540622		0.0114089	0.00507602	0.0110803	0.0157819
333	0.00320402	0.0011283	0.00310347	0.0053228		0.011208	0.00501146	0.0109081	0.0155093
334	0.00301721	0.00103374	0.00290469	0.00503123		0.0106442	0.00465565	0.0103099	0.0147632
335	0.00333963	0.00115058	0.00312723	0.00533027		0.011647	0.00507602	0.0109282	0.0154519
336	0.00258805	0.000930317	0.00255537	0.00432143		0.00901862	0.00409755	0.00892106	0.0125165
337	0.00253062	0.000887431	0.00245234	0.00420477		0.00885793	0.00395551	0.00862264	0.012241
338	0.00318327	0.00109252	0.0029734	0.00506403		0.0110904	0.00482782	0.0103859	0.0146628
339	0.00346844	0.00124776	0.00341391	0.0057793		0.0120746	0.00549066	0.0119067	0.0167288
340	0.00411598	0.00141645	0.00385575	0.00655993		0.0143342	0.0062611	0.0134562	0.0189669
341	0.00346728	0.00124812	0.00341148	0.00576959		0.0120631	0.00549639	0.0118909	0.0166714
342	0.00381292	0.00137446	0.00374313	0.00633591		0.0132539	0.00604159	0.0130344	0.018307
343	0.00394196	0.00142139	0.00387229	0.00654921		0.0136987	0.00625249	0.0134806	0.0189095
344	0.00284821	0.00102586	0.002692	0.00473327		0.00990671	0.00453083	0.009373	0.0136642
345	0.00368413	0.00132919	0.00361648	0.00611111		0.0127948	0.00585077	0.0125825	0.0176327
346	0.00320332	0.00115752	0.00314219	0.00530985		0.0111147	0.00508894	0.0109225	0.0153084
347	0.0039038	0.00141049	0.00382892	0.00646706		0.0135451	0.00620658	0.013307	0.018637
348	0.0036066	0.00130447	0.00353542	0.00597108		0.0125064	0.00573599	0.0122797	0.0171879
349	0.00335298	0.00121424	0.00328548	0.00554733		0.0116183	0.00533571	0.0114031	0.0159684
350	0.00412188	0.00149395	0.00403908	0.00681499		0.0142754	0.00656526	0.0140129	0.0195982
351	0.00388766	0.00140823	0.00380988	0.00642721		0.0134648	0.00619367	0.013218	0.0184791
352	0.0040728	0.00147553	0.00399265	0.00673096		0.0141033	0.00649352	0.0138493	0.0193543
353	0.0040143	0.00145688	0.00393321	0.00662877		0.013888	0.006406	0.0136312	0.0190387
354	0.00444731	0.00161409	0.00435668	0.00734363		0.0153801	0.00709467	0.0150932	0.0210903
355	0.00451364	0.00163852	0.00442161	0.0074505		0.0156097	0.00720514	0.0153228	0.0213916
356	0.00429029	0.00156004	0.00420308	0.00707663		0.0148206	0.00685794	0.014548	0.0203012
357	0.0030297	0.00110132	0.00296828	0.00499732		0.0104706	0.00484216	0.0102754	0.0143342
358	0.00294984	0.00107298	0.00289007	0.00486375		0.0101908	0.00471734	0.00999997	0.0139454
359	0.00354084	0.00128849	0.00346907	0.00583599		0.0122281	0.00566569	0.012	0.0167288
360	0.00479804	0.00174571	0.00470059	0.00790699		0.016571	0.0076786	0.0162553	0.0226542
361	0.00349973	0.00127432	0.00342899	0.00576633		0.0120803	0.005604	0.0118551	0.0165136
362	0.00349604	0.00127508	0.00342506	0.00575373		0.0120573	0.00560543	0.0118307	0.0164705
363	0.00435532	0.00159027	0.00426695	0.00716363		0.0150071	0.00699137	0.0147345	0.0204877
364	0.0049208	0.0017983	0.0048196	0.00808811		0.016944	0.00790528	0.0166284	0.0231133
365	0.00428639	0.00156661	0.00419942	0.00704531		0.0147632	0.00688663	0.0144906	0.0201291
366	0.00571871	0.00209221	0.00560152	0.00939362		0.0196843	0.00919653	0.0193113	0.0268148
367	0.00524702	0.0019212	0.00514081	0.00861467		0.0180487	0.00844474	0.0177187	0.0245767
368	0.00476913	0.00174648	0.00467163	0.00782888		0.0163988	0.00767716	0.0160975	0.0223385
369	0.00521842	0.00191286	0.00511251	0.00856177		0.0179483	0.00840743	0.017604	0.0244045
370	0.00595355	0.00218446	0.00583151	0.0097624		0.020459	0.00959968	0.0200717	0.0278191
371	0.00495714	0.00182062	0.00485608	0.00812307		0.0170301	0.00799997	0.0167001	0.0231276
372	0.00411918	0.00151302	0.00403543	0.00675018		0.0141449	0.00664847	0.0138794	0.0192252
373	0.00504357	0.00185455	0.00494163	0.00826048		0.0173027	0.00814775	0.016987	0.0235006
374	0.00478475	0.00176047	0.00468644	0.0078322		0.0164131	0.00773455	0.0160975	0.0222668
375	0.00386407	0.00142302	0.00378516	0.00632266		0.0132482	0.00625106	0.0129985	0.017977
376	0.00478707	0.00176292	0.00468888	0.00783295		0.0164131	0.00774316	0.0160975	0.0222668
377	0.00527103	0.001943	0.00516321	0.00862139		0.0180631	0.00853369	0.0177187	0.0244906
378	0.00671449	0.0024768	0.00657675	0.0109745		0.0229985	0.0108766	0.0225681	0.031162
379	0.00525114	0.00193762	0.00514418	0.00858194		0.017977	0.00850786	0.017647	0.0243615
380	0.00499277	0.00184199	0.00489053	0.00816094		0.0171018	0.00808893	0.0167718	0.0231707
381	0.00608329	0.00224739	0.00595954	0.00993794		0.0208177	0.00986654	0.0204303	0.0281922
382	0.00429632	0.001589	0.004209	0.00701422		0.0146915	0.00697415	0.0144189	0.0198852
383	0.00340305	0.00126012	0.00333368	0.00555197		0.0116312	0.00552939	0.0114132	0.0157245
384	0.00362185	0.0013419	0.00354812	0.0059077		0.0123744	0.00588807	0.0121434	0.0167288
385	0.00529749	0.00196405	0.00518954	0.00863697		0.0180918	0.0086169	0.0177474	0.0244476
386	0.00424257	0.00157486	0.0041564	0.006913		0.0144763	0.00690672	0.0142109	0.0195552
387	0.00464725	0.00172661	0.00455228	0.00757007		0.0158536	0.00757099	0.0155523	0.021406
388	0.00483283	0.00179657	0.00473478	0.00786977		0.0164849	0.00787659	0.0161692	0.0222381
389	0.00517165	0.00192428	0.00506692	0.00841977		0.0176327	0.00843469	0.0173027	0.0237876
390	0.00630752	0.00234887	0.00617935	0.0102624		0.021492	0.0102941	0.0210903	0.0289813
391	0.0068553	0.00255505	0.00671664	0.0111487		0.0233428	0.0111951	0.0229124	0.0314633
392	0.00590032	0.00219965	0.0057797	0.00959443		0.020086	0.00963698	0.019713	0.0270731
393	0.00295317	0.00110247	0.00289273	0.00479866		0.0100487	0.00482782	0.0098608	0.0135308
394	0.00438249	0.00163757	0.00429285	0.00711754		0.0149067	0.00717071	0.0146198	0.0200573
395	0.00681649	0.00254835	0.0066785	0.0110671		0.0231707	0.0111563	0.0227402	0.0311764
396	0.00601275	0.00224895	0.00589099	0.00976379		0.0204447	0.00984358	0.0200573	0.0275035
397	0.00265082	0.000992895	0.00259669	0.00430079		0.00900427	0.00434432	0.00883498	0.0121047
398	0.00755541	0.00282998	0.00740296	0.012261		0.0256671	0.0123816	0.0251936	0.0345049
399	0.00849503	0.0031865	0.00832	0.0137724		0.0288378	0.0139354	0.0282926	0.0387373
400	0.00879894	0.0033002	0.00862072	0.0142696		0.0298708	0.0144332	0.0293112	0.040129
401	0.00904904	0.00338611	0.00886511	0.0146808		0.030746	0.014835	0.0301721	0.0413198
402	0.00959009	0.00359295	0.00939394	0.0155465		0.0325537	0.0157388	0.0319511	0.0437158
403	0.00914663	0.00343148	0.00895967	0.0148206		0.0310329	0.0150215	0.0304447	0.0416498
404	0.00902028	0.00338545	0.00883559	0.0146129		0.0305881	0.0148206	0.0300142	0.0410616
405	0.00903411	0.00339149	0.00885027	0.0146349		0.0306312	0.014835	0.0300716	0.0411189
406	0.00892666	0.00335652	0.0087461	0.0144521		0.0302438	0.0146771	0.0296843	0.0405738
407	0.00882303	0.00332172	0.00864323	0.0142727		0.0298708	0.0145193	0.0293112	0.0400429
408	0.00916603	0.00344918	0.00897883	0.0148319		0.0310472	0.0150789	0.030459	0.0416067
409	0.00983481	0.0037027	0.00963318	0.0159078		0.0332997	0.0161836	0.0326685	0.0446197
410	0.00861661	0.00324712	0.00844003	0.0139319		0.0291534	0.0141908	0.0286082	0.039053
411	0.00936231	0.00353197	0.00917041	0.015134		0.0316642	0.0154232	0.0310759	0.0424102
412	0.0100987	0.00381581	0.00989139	0.0163115		0.0341319	0.016657	0.0334863	0.045667
413	0.0098429	0.00371717	0.00964235	0.0159029		0.0332711	0.0162266	0.0326541	0.0445336
414	0.010002	0.00378233	0.00979771	0.0161516		0.0337875	0.0165136	0.0331563	0.0452079
415	0.0100653	0.00381066	0.00985929	0.0162437		0.0339884	0.0166284	0.0333428	0.0454374
416	0.0102904	0.00390105	0.0100788	0.016596		0.0347201	0.0170157	0.0340601	0.0463844
417	0.0100565	0.00381365	0.00985232	0.016219		0.0339167	0.0166284	0.0332854	0.0453227
418	0.00989188	0.00375339	0.00969	0.0159494		0.0333571	0.0163701	0.0327402	0.0445623
419	0.0100466	0.00381467	0.00984089	0.0161931		0.0338736	0.0166284	0.033228	0.0452222
420	0.010021	0.00380672	0.00981758	0.0161521		0.0337732	0.0165853	0.0331419	0.0451075
421	0.0105158	0.00399819	0.0103005	0.0169432		0.0354231	0.0174174	0.0347632	0.0472882
422	0.0100185	0.00381102	0.00981414	0.0161389		0.0337445	0.0165997	0.0331132	0.0450357
423	0.00981726	0.00373546	0.00961475	0.0158064		0.0330558	0.0162697	0.0324246	0.0440888
424	0.0104021	0.00395934	0.0101897	0.0167505		0.0350214	0.0172453	0.0343614	0.0467143
425	0.0104228	0.00397177	0.0102098	0.0167758		0.0350644	0.0172883	0.0344188	0.0467574
426	0.0102041	0.00389555	0.00999389	0.0164079		0.034304	0.016944	0.0336584	0.0456957
427	0.0100271	0.00382908	0.00982096	0.0161209		0.0337015	0.016657	0.0330702	0.0448922
428	0.00977403	0.00373211	0.0095755	0.0157202		0.032855	0.016241	0.0322381	0.0437732
429	0.00930503	0.00356019	0.00911534	0.0149504		0.0312481	0.0154806	0.0306599	0.0415924
430	0.00816417	0.00312654	0.00799757	0.0131162		0.0274031	0.0135853	0.0268866	0.0364705
431	0.00809321	0.00309671	0.00792904	0.0130046		0.0271735	0.0134591	0.0266714	0.0361692
432	0.0105019	0.00402491	0.0102849	0.0168595		0.0352223	0.0174892	0.0345623	0.0468578
433	0.0105886	0.00406066	0.0103702	0.0169954		0.0355092	0.0176327	0.0348349	0.0472165
434	0.00984125	0.00377348	0.00963915	0.0157975		0.0329985	0.0163845	0.0323815	0.0438879
435	0.0102806	0.00394045	0.0100717	0.0165092		0.0344762	0.0171162	0.0338449	0.0458822
436	0.0116355	0.00446752	0.0113972	0.0186696		0.0389956	0.0193974	0.0382639	0.0518363
437	0.0115332	0.00443632	0.0112961	0.0184903		0.0386082	0.0192395	0.0378908	0.0512911
438	0.0105426	0.00405863	0.0103234	0.0168908		0.0352797	0.017604	0.0346053	0.0468291
439	0.0108683	0.00417413	0.0106463	0.017436		0.0364131	0.0181205	0.0357388	0.0484073
440	0.011263	0.00433111	0.0110315	0.0180574		0.0377043	0.0187948	0.0370013	0.0500859
441	0.0117418	0.0045227	0.0114964	0.0188055		0.0392682	0.0196126	0.0385221	0.0521089
442	0.0126376	0.00487104	0.0123659	0.0202239		0.0422524	0.021119	0.0414346	0.0560256
443	0.0123358	0.00475363	0.0120439	0.0197068		0.0412481	0.0206025	0.0403729	0.0546196
444	0.012609	0.0048601	0.0123333	0.0201713		0.0421519	0.0210616	0.0413198	0.0558822
445	0.0123329	0.00475112	0.0120605	0.0197316		0.0412481	0.0206025	0.0404159	0.0546914
446	0.0118351	0.00457118	0.011572	0.0189166		0.0395264	0.0197991	0.0387373	0.0523671
447	0.0128309	0.00496113	0.012559	0.0205151		0.0428263	0.0214777	0.0420085	0.0567573
448	0.0129934	0.00501403	0.0127254	0.0208031		0.0434145	0.0217216	0.042611	0.0576038
449	0.0131303	0.00507919	0.0128555	0.0209972		0.0438162	0.0219798	0.0429841	0.0580629
450	0.0135533	0.00524819	0.0132684	0.0216588		0.0451935	0.0227115	0.0443471	0.0598563
451	0.0140842	0.00545515	0.0137881	0.0225073		0.0469582	0.0236011	0.0460687	0.0621949
452	0.0135972	0.00526905	0.0133141	0.0217274		0.045337	0.0227833	0.0444762	0.0600285
453	0.0128189	0.00497075	0.0125525	0.0204785		0.0427258	0.021492	0.0419224	0.0565565
454	0.013432	0.00521603	0.013151	0.0214444		0.0447344	0.0225394	0.0438879	0.059182
455	0.0135317	0.00525225	0.0132485	0.021605		0.0450644	0.0226972	0.0442179	0.0596411
456	0.013896	0.00539734	0.0136023	0.0221801		0.0462696	0.0233285	0.0453801	0.061205
457	0.0141673	0.00550369	0.013868	0.0226118		0.0471591	0.0237876	0.0462696	0.0623814
458	0.0136847	0.00530881	0.0133977	0.0218545		0.0455809	0.0229554	0.0447201	0.0603298
459	0.0136689	0.00530546	0.0133754	0.0218133		0.0455092	0.0229411	0.044634	0.0601863
460	0.0137269	0.00532477	0.0134336	0.0219123		0.04571	0.0230272	0.0448349	0.0604733
461	0.0140793	0.0054625	0.0137747	0.0224675		0.0468722	0.0236298	0.0459683	0.0619941
462	0.0142416	0.00553316	0.0139311	0.0227109		0.0473887	0.0239167	0.0464561	0.0626253
463	0.0141267	0.00548217	0.0138221	0.0225422		0.04703	0.0237015	0.0461118	0.0621949
464	0.0139413	0.00542071	0.0136426	0.0222318		0.04637	0.0234146	0.0454805	0.061291
465	0.0138233	0.00538664	0.0135272	0.0220265		0.0459252	0.0232424	0.0450501	0.0606598
466	0.0140101	0.00546716	0.01371	0.0223117		0.0465135	0.0235724	0.045624	0.0614058
467	0.013748	0.00535753	0.013454	0.0219063		0.045667	0.0231133	0.0447918	0.0603298
468	0.0139538	0.0054405	0.013653	0.022227		0.0463413	0.0234719	0.0454518	0.0611906
469	0.0140825	0.00549179	0.013773	0.0224184		0.0467574	0.0236872	0.0458392	0.0617071
470	0.0136677	0.00533122	0.013357	0.0217462		0.0453801	0.0229985	0.0444618	0.0598563
471	0.0136811	0.00533846	0.0133775	0.0217736		0.0454087	0.0230272	0.0445192	0.0599137
472	0.0144378	0.00563186	0.0141188	0.0229807		0.0479338	0.0242897	0.0469869	0.0632423
473	0.0142848	0.00557315	0.0139673	0.0227338		0.0474173	0.0240315	0.0464704	0.0625679
474	0.0142918	0.00556652	0.013984	0.0227729		0.0474747	0.0240315	0.0465709	0.0627258
475	0.0144574	0.00562642	0.0141463	0.0230436		0.0480486	0.0242897	0.0471161	0.0634718
476	0.0140884	0.00547948	0.0137837	0.0224571		0.0468291	0.0236728	0.0459252	0.0618649
477	0.0141728	0.00550871	0.0138626	0.0225944		0.0471161	0.0238019	0.0461978	0.0622667
478	0.0146014	0.00567544	0.014279	0.0232705		0.0485364	0.0245336	0.0475752	0.0641174
479	0.0145347	0.00564889	0.014208	0.0231562		0.0483069	0.0244189	0.0473456	0.0637874
480	0.0145831	0.00566551	0.0142523	0.0232285		0.0484503	0.0244906	0.0474891	0.063974
481	0.0149007	0.0057944	0.0145588	0.0237203		0.0494833	0.0250501	0.048479	0.0652939
482	0.0150276	0.00585059	0.0146789	0.0239053		0.0498707	0.0252797	0.0488521	0.0657674
483	0.0148965	0.00581006	0.0145504	0.0236809		0.0493973	0.0250788	0.0483786	0.065093
484	0.0146221	0.00570796	0.0142828	0.0232374		0.0484647	0.0246341	0.0474747	0.0638448
485	0.0139542	0.00545216	0.0136256	0.0221622		0.0462265	0.023515	0.0452796	0.0608893
486	0.0122214	0.00478095	0.011935	0.0194049		0.0404733	0.0206025	0.0396412	0.0532853
487	0.0128415	0.00502969	0.0125436	0.0203849		0.0424963	0.0216642	0.0416354	0.0559396
488	0.0140921	0.00551397	0.0137668	0.0223776		0.0466569	0.0237589	0.04571	0.0614345
489	0.0141391	0.00552521	0.0138106	0.0224612		0.0468435	0.0238163	0.0458822	0.0616928
490	0.0149375	0.00584443	0.0145912	0.023719		0.0494546	0.0251793	0.048436	0.0651074
491	0.0147411	0.00577389	0.0143968	0.0233933		0.048766	0.0248636	0.0477617	0.0641748
492	0.0139495	0.00546405	0.0136232	0.0221357		0.0461404	0.0235293	0.0451935	0.0607172
493	0.0144311	0.00565344	0.0140954	0.0229013		0.047733	0.0243471	0.0467574	0.0628118
494	0.0145895	0.00571357	0.0142492	0.0231557		0.0482638	0.0246054	0.0472739	0.0635149
495	0.0147402	0.00577377	0.0143977	0.0233944		0.0487516	0.0248636	0.0477617	0.0641748
496	0.0148606	0.00581927	0.0145134	0.0235842		0.0491534	0.0250645	0.0481491	0.0646913
497	0.0151418	0.00593022	0.0147845	0.0240251		0.0500716	0.0255523	0.0490386	0.0658821
498	0.0144883	0.00567406	0.0141428	0.0229792		0.0479051	0.0244476	0.0469008	0.0629984
499	0.0147175	0.00576008	0.0143636	0.023342		0.0486655	0.0248206	0.0476469	0.0640027
500	0.01433	0.0056037	0.0139779	0.0227241		0.0473887	0.0241606	0.0463844	0.062324
501	0.014093	0.00550189	0.0137382	0.0223477		0.0466283	0.0237445	0.0456096	0.0613197
502	0.0139236	0.00542532	0.0135422	0.0220541		0.0461118	0.0234433	0.0450214	0.060588
503	0.0145236	0.00564722	0.0140914	0.0229715		0.0481347	0.0244189	0.0469152	0.0631849
504	0.014254	0.00552425	0.0136293	0.0222888		0.0473026	0.0239311	0.0455522	0.0615349
505	0.0147075	0.00570652	0.0142626	0.0232694		0.0487803	0.0247058	0.0475178	0.0640457
506	0.0152563	0.00592466	0.0147524	0.0240677		0.0505737	0.0256384	0.0491534	0.0662408
507	0.0145618	0.00566025	0.0140608	0.0229389		0.0482495	0.0244906	0.0468435	0.0631275
508	0.0141279	0.00549974	0.0136692	0.0222803		0.0467861	0.0237732	0.0454948	0.0612624
509	0.0145273	0.00565864	0.0140848	0.0229446		0.0480917	0.0244476	0.0468435	0.0630557
510	0.014462	0.00563682	0.0140415	0.0228655		0.0478621	0.0243471	0.0466713	0.0627975
511	0.0148738	0.00580127	0.0144743	0.0235547		0.0491964	0.0250501	0.0480773	0.0646483
512	0.015067	0.00587958	0.0146751	0.0238753		0.0498277	0.0253801	0.0487229	0.0654948
513	0.0143032	0.00558421	0.0139334	0.0226632		0.0472882	0.0241032	0.0462409	0.0621519
514	0.0142424	0.00556227	0.0138747	0.0225644		0.047073	0.0240028	0.0460257	0.0618506
515	0.0141354	0.00552079	0.0137689	0.0223922		0.0467143	0.0238306	0.0456813	0.0613771
516	0.0141353	0.00552007	0.0137668	0.0223912		0.0467143	0.0238306	0.045667	0.0613771
517	0.0125887	0.00491713	0.0122604	0.0199391		0.0415924	0.0212194	0.0406598	0.0546483
518	0.0132559	0.00517532	0.0129081	0.0209952		0.0438019	0.0223385	0.0428263	0.0575464
519	0.0139216	0.00543273	0.0135561	0.0220529		0.0460113	0.0234576	0.0449783	0.0604589
520	0.0144556	0.00563891	0.0140739	0.0228998		0.0477904	0.0243615	0.0467	0.0627831
521	0.0146284	0.00570515	0.0142424	0.0231736		0.0483499	0.0246484	0.0472595	0.0635292
522	0.0146762	0.00572039	0.0142842	0.0232487		0.0485221	0.0247201	0.0474173	0.0637444
523	0.0144462	0.00562827	0.0140568	0.0228838		0.0477617	0.0243328	0.0466713	0.0627545
524	0.0150009	0.00583768	0.0145806	0.0237466		0.0496125	0.025251	0.048436	0.0651504
525	0.015188	0.00589889	0.0147567	0.0240542		0.0502724	0.0255379	0.0490673	0.0660543
526	0.0145388	0.00564088	0.0141323	0.0230425		0.0481347	0.0244332	0.0470013	0.063271
527	0.013741	0.00532477	0.0133428	0.0217671		0.0455092	0.0230846	0.0444044	0.0597989
528	0.0145598	0.00563371	0.0141438	0.0230842		0.0482495	0.0244332	0.0470874	0.0634431
529	0.0153811	0.0059466	0.0149332	0.024383		0.0509898	0.0258105	0.0497416	0.0670299
530	0.0151945	0.00587127	0.0147497	0.0240898		0.0503729	0.0254949	0.049139	0.0662408
531	0.0154569	0.00596907	0.0149988	0.0245052		0.051248	0.0259253	0.0499711	0.0673886
532	0.0149565	0.00577312	0.0145132	0.0237143		0.0495981	0.0250788	0.0483643	0.0652222
533	0.0145515	0.00561625	0.0141195	0.02307		0.0482495	0.0243902	0.0470443	0.0634431
534	0.0150206	0.00579996	0.0145732	0.023808		0.0497846	0.0251936	0.0485508	0.0654517
535	0.0153809	0.0059445	0.014925	0.024375		0.0509611	0.0258105	0.0496985	0.0669869
536	0.0155503	0.00601212	0.0150892	0.0246386		0.0515063	0.0260975	0.0502294	0.0676899
537	0.0149669	0.00578997	0.0145239	0.0237092		0.0495694	0.0251219	0.0483356	0.0651217
538	0.0152568	0.00590242	0.0147991	0.0241611		0.0505163	0.0256097	0.0492538	0.0663699
539	0.0151613	0.00586625	0.0147009	0.0240023		0.0502007	0.0254519	0.0489238	0.0659252
540	0.0145799	0.00564082	0.0141129	0.0230483		0.0482782	0.0244762	0.0469869	0.0633283
541	0.0147298	0.00569361	0.0141954	0.0232054		0.0487803	0.0247201	0.0473169	0.0638305
542	0.0152123	0.00587265	0.0146544	0.0239661		0.0504016	0.0255092	0.0488808	0.0659539
543	0.0150668	0.00581891	0.0145733	0.0238152		0.0499138	0.0252653	0.0485508	0.0654661
544	0.0153796	0.00593434	0.0148236	0.0242448		0.0509611	0.0257818	0.0494259	0.0667143
545	0.0153422	0.00591605	0.0148113	0.0242216		0.0508463	0.0257101	0.0493829	0.0666282
546	0.015451	0.00595383	0.0148646	0.0243291		0.0512193	0.0258823	0.0496125	0.0670012
547	0.0154468	0.00595293	0.0149123	0.024396		0.051205	0.0258823	0.0497272	0.0671303
548	0.0152766	0.00588688	0.0147694	0.0241564		0.0506311	0.0255953	0.0492394	0.0664417
549	0.015356	0.00591976	0.0148555	0.0242934		0.0508894	0.0257388	0.049512	0.0668004
550	0.0155857	0.00601146	0.0150789	0.0246544		0.0516354	0.0261262	0.0502437	0.067776
551	0.0154344	0.00595485	0.0149389	0.0244202		0.0511189	0.0258823	0.0497559	0.0671016
552	0.0155705	0.00600608	0.015075	0.0246439		0.0515637	0.0260975	0.050215	0.0677186
553	0.0153138	0.00590421	0.0148282	0.0242438		0.0507315	0.0256671	0.0493973	0.0666282
554	0.0157125	0.00605534	0.0152147	0.0248781		0.0520515	0.026327	0.0506885	0.0683642
555	0.0157763	0.00607763	0.0152745	0.0249813		0.0522667	0.0264275	0.0508894	0.0686655
556	0.0156015	0.00600656	0.015103	0.0247054		0.0516928	0.0261262	0.0503298	0.0679051
557	0.0151456	0.00582758	0.0146591	0.0239857		0.0502007	0.0253514	0.0488664	0.0659539
558	0.0150579	0.00578645	0.0145697	0.0238525		0.0499281	0.0251936	0.0485938	0.0656095
559	0.0148091	0.0056841	0.0143248	0.0234634		0.0491247	0.0247632	0.0477904	0.0645622
560	0.0150308	0.00576439	0.0145349	0.0238138		0.0498707	0.0251219	0.0485077	0.0655378
561	0.0152642	0.00584868	0.0147536	0.0241831		0.0506598	0.0255092	0.0492538	0.0665708
562	0.0151855	0.00581143	0.014674	0.0240638		0.0504159	0.0253658	0.0490099	0.0662695
563	0.0156335	0.00597463	0.0150992	0.0247754		0.0519367	0.0260975	0.0504733	0.0682638
564	0.0152306	0.00581209	0.0147079	0.0241449		0.0506168	0.0253945	0.049182	0.0665565
565	0.0151349	0.00577037	0.0146122	0.0239947		0.0503155	0.0252366	0.0488808	0.0661691
566	0.0149554	0.00569917	0.0144346	0.0237087		0.0497272	0.024921	0.0482925	0.06538
567	0.0152735	0.00581401	0.0147299	0.0242053		0.0508033	0.0254375	0.0493112	0.066786
568	0.0151826	0.00576522	0.0145727	0.0239844		0.050545	0.0252653	0.0488951	0.0663125
569	0.0149155	0.00564435	0.0141326	0.0233325		0.0497416	0.0247775	0.0476039	0.0647631
570	0.0149106	0.00564106	0.0142169	0.0234538		0.0497272	0.0247632	0.0478334	0.0650213
571	0.0148073	0.00560041	0.0142358	0.0234545		0.0493686	0.024591	0.0478191	0.0649065
572	0.0152263	0.00574448	0.0145456	0.0240097		0.050832	0.025251	0.0489812	0.0665995
573	0.0154205	0.00581329	0.0147497	0.0243471		0.0514919	0.0255666	0.0496555	0.0675321
574	0.0153985	0.00580121	0.014746	0.0243419		0.0514345	0.0255236	0.0496555	0.0675177
575	0.0151414	0.00569743	0.0144972	0.0239383		0.0506024	0.0250788	0.0488377	0.0664417
576	0.0150224	0.00565427	0.0144071	0.0237844		0.0502007	0.0248923	0.0485221	0.0659969
577	0.0152045	0.00572499	0.014596	0.0240883		0.0508033	0.0251936	0.049139	0.0668147
578	0.0149896	0.00565105	0.0144296	0.0237931		0.0500572	0.0248493	0.0485221	0.0659252
579	0.0150634	0.00569182	0.0145219	0.0239215		0.0502437	0.0250071	0.048766	0.0661978
580	0.0153721	0.00583062	0.0148214	0.0243836		0.0511906	0.0255666	0.0496842	0.0673742
581	0.0154766	0.00588843	0.0149321	0.0245372		0.0514776	0.0257818	0.0499855	0.0677042
582	0.0158036	0.00602939	0.0152426	0.0250238		0.0524962	0.0263557	0.0509611	0.0689668
583	0.0158767	0.00607201	0.0153115	0.0251174		0.0526828	0.0265135	0.0511333	0.0691676
584	0.0160439	0.00614519	0.0154604	0.0253511		0.0531992	0.0268148	0.0516067	0.0697702
585	0.0156744	0.00600745	0.0150991	0.0247512		0.051951	0.0261979	0.0503872	0.0681059
586	0.0153799	0.0058965	0.0147825	0.0242394		0.0509754	0.0257101	0.0493542	0.0667286
587	0.0157565	0.0060331	0.0150575	0.0247217		0.0522523	0.026327	0.0503585	0.0681777
588	0.0154877	0.00590708	0.0144668	0.0238642		0.0514632	0.0258249	0.0486942	0.0662265
589	0.0139009	0.00524873	0.0125076	0.0207979		0.046413	0.0230559	0.0425393	0.0583212
590	0.0145429	0.00549394	0.0131008	0.0217818		0.0485364	0.0241319	0.0445623	0.0610615
591	0.015329	0.00582333	0.0140596	0.0232853		0.0510185	0.0255092	0.0475752	0.0649496
592	0.0152239	0.00576265	0.0138348	0.0229546		0.0507459	0.025294	0.0469152	0.0641748
593	0.0154097	0.00585424	0.0142457	0.0235504		0.0512767	0.0256384	0.0480773	0.0655091
594	0.0153898	0.00583851	0.0141472	0.0234131		0.0512337	0.0255953	0.0477904	0.0652078
595	0.0150976	0.005711	0.0137034	0.022753		0.0503298	0.0250788	0.0464991	0.0636153
596	0.0155672	0.00592304	0.0145429	0.024004		0.0517358	0.0259253	0.0489525	0.0665995
597	0.0154503	0.00586601	0.014386	0.0237732		0.0513915	0.0257101	0.0484934	0.06604
598	0.0154182	0.00586697	0.0144463	0.023841		0.0512193	0.0256814	0.0485938	0.0660973
599	0.0154484	0.00588329	0.014548	0.0239859		0.0512911	0.0257388	0.0488664	0.0663986
600	0.0154602	0.00589662	0.0146928	0.0241825		0.0512911	0.0257818	0.0492394	0.0667717
601	0.0153266	0.00585053	0.014671	0.0241131		0.050832	0.0255666	0.0490673	0.066456
602	0.0152337	0.00581377	0.014609	0.0240073		0.0505163	0.0254088	0.0488377	0.066126
603	0.0154946	0.00591617	0.0148977	0.0244647		0.0513772	0.0258536	0.0497559	0.0673455
604	0.0157611	0.00601995	0.0151714	0.02491		0.0522523	0.0262983	0.0506598	0.0685507
605	0.0157083	0.00600482	0.015135	0.0248381		0.0520658	0.0262123	0.050502	0.0683212
606	0.0156924	0.00601116	0.0151215	0.0247959		0.0519654	0.0262266	0.0504159	0.068149
607	0.0158958	0.00610358	0.0153187	0.0250999		0.0525823	0.0265853	0.0510185	0.0689237
608	0.0157584	0.00606191	0.0151894	0.0248703		0.0520802	0.0263844	0.050545	0.0682494
609	0.0158161	0.00609366	0.0152508	0.024954		0.0522523	0.0264992	0.0507172	0.0684359
610	0.0157139	0.0060606	0.0151561	0.0247864		0.0518937	0.0263414	0.0503729	0.0679481
611	0.0158243	0.00611201	0.0152702	0.0249592		0.052238	0.0265422	0.0507315	0.0683929
612	0.0157888	0.00610196	0.0152417	0.0249034		0.0521089	0.0264992	0.0506168	0.0682351
613	0.0156072	0.00603561	0.0150723	0.0246189		0.0514919	0.0261979	0.0500429	0.0674316
614	0.0154198	0.00597164	0.0148951	0.0243158		0.0508463	0.0258966	0.0494259	0.0665708
615	0.0157878	0.00612468	0.0152534	0.0248857		0.0520228	0.0265422	0.0505737	0.0680916
616	0.0152908	0.00593924	0.0147762	0.0240976		0.0503729	0.0257244	0.0489668	0.0659108
617	0.0152792	0.00593865	0.0147686	0.0240769		0.0503155	0.0257101	0.0489238	0.0658391
618	0.0158878	0.00617992	0.015361	0.0250328		0.0523097	0.0267431	0.050875	0.0684359
619	0.0157489	0.00612881	0.0152308	0.0248145		0.0518363	0.0265135	0.0504302	0.0678333
620	0.0158514	0.00616665	0.015336	0.0249853		0.0521949	0.0266857	0.0507889	0.0683212
621	0.0158549	0.00615648	0.0153466	0.0250153		0.0522523	0.0266714	0.0508607	0.0684503
622	0.0155445	0.00600381	0.015055	0.0245779		0.0513628	0.0260831	0.0500142	0.0674173
623	0.0151873	0.00583648	0.0147172	0.0240639		0.0503155	0.0254232	0.0490099	0.0661547
624	0.0150204	0.00579045	0.0145516	0.0237686		0.0496842	0.0251793	0.048393	0.0652652
625	0.0151298	0.00585663	0.0146546	0.0239052		0.0499424	0.0254088	0.0486369	0.0655235
626	0.0154141	0.00597302	0.0149093	0.0243163		0.0508607	0.025911	0.0494833	0.0666425
627	0.0156506	0.00605821	0.0150587	0.0245831		0.0516641	0.026284	0.0500572	0.067489
628	0.0147097	0.00552575	0.014072	0.0232108		0.0492394	0.0243615	0.0474891	0.0646339
629	0.0153723	0.00589722	0.0147541	0.0241599		0.0509754	0.0257101	0.0492825	0.0666425
630	0.0150375	0.00576439	0.014513	0.0237511		0.0498851	0.0251506	0.048436	0.0654661
631	0.0154115	0.00597272	0.014909	0.0243043		0.0508607	0.025911	0.0494833	0.0666425
632	0.015316	0.00596106	0.0146926	0.0239489		0.0504589	0.0257962	0.048766	0.0656669
633	0.0158298	0.0061948	0.015238	0.0247826		0.0520228	0.0267287	0.0504159	0.0677473
634	0.0156958	0.0061636	0.015152	0.0246026		0.0514919	0.0265422	0.0500142	0.067116
635	0.0159717	0.00628609	0.0154038	0.0249968		0.0523528	0.02703	0.0508033	0.068149
636	0.0157676	0.0062165	0.0152218	0.024684		0.0516498	0.0267144	0.0501577	0.0672451
637	0.0160389	0.00633176	0.0154808	0.0250932		0.0525106	0.0271879	0.0509898	0.0683355
638	0.0162041	0.00641127	0.0156837	0.025391		0.0529984	0.0274891	0.051578	0.0690385
639	0.0160642	0.00636798	0.0155431	0.0251492		0.0524962	0.0272739	0.0510759	0.0683355
640	0.0159448	0.00633487	0.0154352	0.0249546		0.0520515	0.0271018	0.0506598	0.0677473
641	0.0159683	0.006354	0.0154556	0.0249729		0.0520945	0.0271592	0.0507028	0.0677616
642	0.0159171	0.00634419	0.0154211	0.024901		0.0518937	0.0271018	0.050545	0.0675177
643	0.0161656	0.00644827	0.0156258	0.0252341		0.0526971	0.0275322	0.0512193	0.0684359
644	0.0161365	0.00644546	0.0156123	0.0251954		0.052568	0.0274891	0.0511333	0.0682781
645	0.0162104	0.00647613	0.0156186	0.0252187		0.0528119	0.0276183	0.051205	0.0684072
646	0.0159272	0.00635364	0.0151228	0.0244814		0.0519224	0.0271161	0.0497703	0.0666712
647	0.0158764	0.00630115	0.0147442	0.0239785		0.0518793	0.0269727	0.0488521	0.0657243
648	0.0159734	0.00634539	0.0147062	0.0239355		0.0521949	0.0271448	0.048766	0.0656813
649	0.0156867	0.00622643	0.0144742	0.0235483		0.0512624	0.026657	0.0479912	0.0646052
650	0.0156469	0.00625978	0.0148474	0.0240091		0.0509467	0.0266714	0.0487947	0.0653082
651	0.01632	0.00654039	0.015564	0.0251366		0.0530988	0.0278478	0.0510759	0.0682781
652	0.0158702	0.00631885	0.0145387	0.023657		0.0518076	0.026987	0.0482064	0.0649352
653	0.0161667	0.00648527	0.0153917	0.0248527		0.0525823	0.0275896	0.0504876	0.067489
654	0.0159913	0.00641999	0.0152596	0.0246292		0.0519941	0.0273026	0.0500285	0.0668577
655	0.0155057	0.00620012	0.0145595	0.0235657		0.0505163	0.0264275	0.0479195	0.0642322
656	0.0137012	0.00549825	0.0129784	0.0209688		0.0445623	0.0233859	0.0426254	0.0570299
657	0.0140828	0.00565445	0.0133255	0.0215277		0.0457961	0.0240458	0.0437588	0.0585364
658	0.0157459	0.00633319	0.0150471	0.0242571		0.051162	0.0269009	0.0492681	0.0657674
659	0.0158063	0.00635579	0.0151741	0.0244538		0.0513772	0.0270157	0.0496698	0.0662839
660	0.0157793	0.00632656	0.0151844	0.0244805		0.0513485	0.0269296	0.0497416	0.066413
661	0.0156949	0.00625333	0.0152173	0.0245546		0.0512337	0.0267144	0.0499138	0.0666999
662	0.0155833	0.00616372	0.0151827	0.0245361		0.0510472	0.0264275	0.0499138	0.0668004
663	0.0153935	0.00611512	0.0149828	0.024184		0.0503298	0.0261692	0.049182	0.0657387
664	0.015763	0.00631364	0.0153426	0.0246978		0.0513341	0.0268866	0.0501577	0.0668864
665	0.0158891	0.00640027	0.015469	0.0248569		0.0516067	0.0271735	0.0504446	0.0671447
666	0.0160137	0.0064769	0.0155968	0.0250295		0.0519224	0.0274318	0.0507602	0.067489
667	0.0160808	0.00652538	0.0156649	0.0251096		0.0520515	0.0275896	0.0509037	0.0676038
668	0.0161351	0.00656209	0.0157323	0.0251971		0.0521806	0.0277044	0.0510472	0.0677616
669	0.0164233	0.00668823	0.0160108	0.02563		0.0530845	0.0282209	0.0519224	0.068895
670	0.0163866	0.00667908	0.015978	0.0255696		0.052941	0.0281635	0.0517932	0.0687085
671	0.0164088	0.00669576	0.0160034	0.0256027		0.052984	0.0282209	0.0518506	0.0687659
672	0.016296	0.00665355	0.0158962	0.025421		0.052611	0.0280343	0.0514919	0.0682638
673	0.0165678	0.00677	0.0161632	0.025841		0.0534718	0.0285078	0.0523384	0.0693685
674	0.0165334	0.00676187	0.0161303	0.0257838		0.0533427	0.0284648	0.0522093	0.0691963
675	0.016408	0.00671566	0.0160103	0.0255846		0.0529267	0.0282495	0.0518076	0.0686368
676	0.0165443	0.00677455	0.0161441	0.0257927		0.0533427	0.0284934	0.0522236	0.069182
[truncated: 124 more rows]

## Sheet: 50degN
50 degrees N latitude	Daily Irradiance (mE cm-2 d-1 nm-1)					Solar Noon Irradiance (mE cm-2 d-1 nm-1)
[truncated: 522 more rows]

[truncated: 5 more sheets: 50degS, 60degN, 60degS, 70degN, 70degS]
